# Supplementary material for: Dislocation and disclination densities in experimentally deformed polycrystalline olivine
Source: Copernicus journal article supplement (doi:10.5194/ejm-35-219-2023), 2023-03-31

# Dislocation and disclination densities in polycrystalline olivine experimentally deformed at high temperatures

Sylvie Demouchy\*, Manuel Thieme, Fabrice Barou, Benoit Beausir,  
Vincent Taupin & Patrick Cordier

**Supplementary Figure S2:** Selection of overlay maps showing both  $\theta_{33}$  distribution with internal misorientation a)  $\theta_{33}$  and general misorientation ; b)  $\theta_{33}$  and misorientation in direction 1 ; c)  $\theta_{33}$  and misorientation in direction 2; d)  $\theta_{33}$  and misorientation in direction 3: and e)  $\theta_{33}$  and entrywise norm of GND. All maps are from sample CMT16-9\_SII. See main text for the experimental and data acquisition. *Nota Bene:* Zoom into the document to decipher selected area.

Fig. S2a

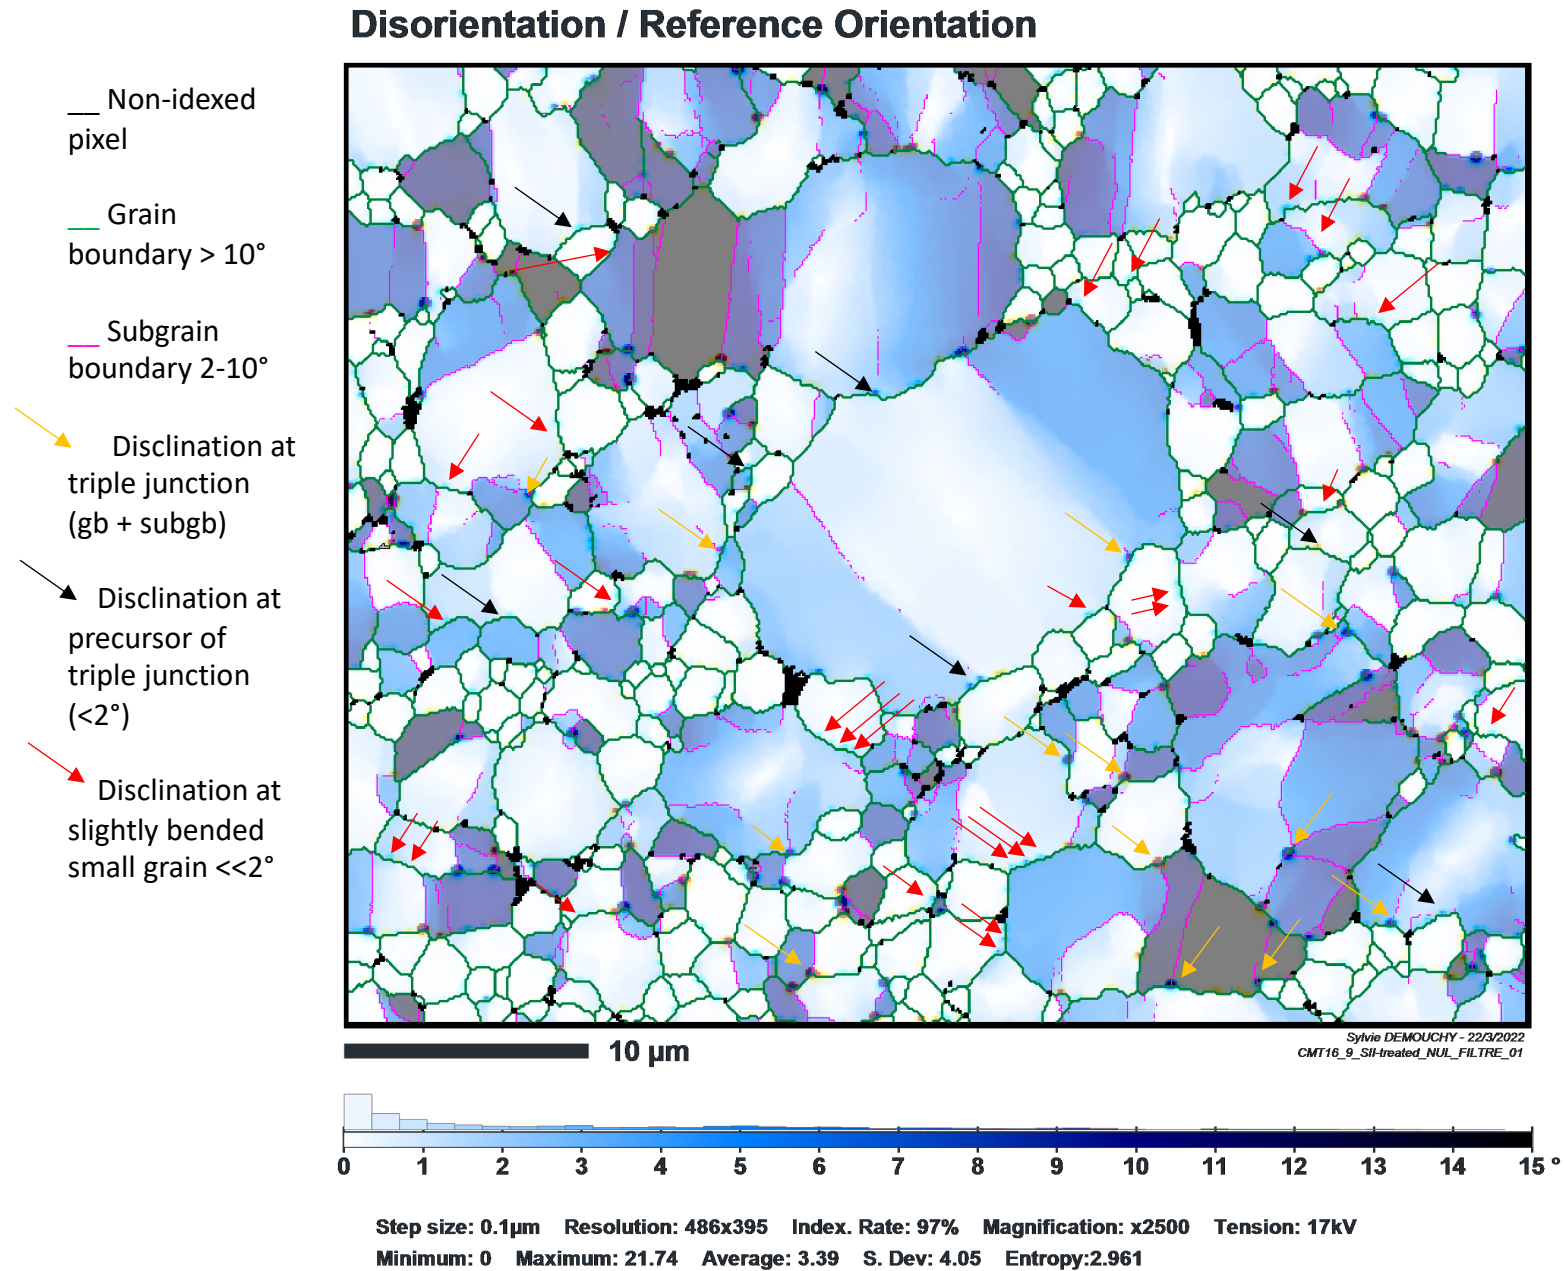

Fig. S2b

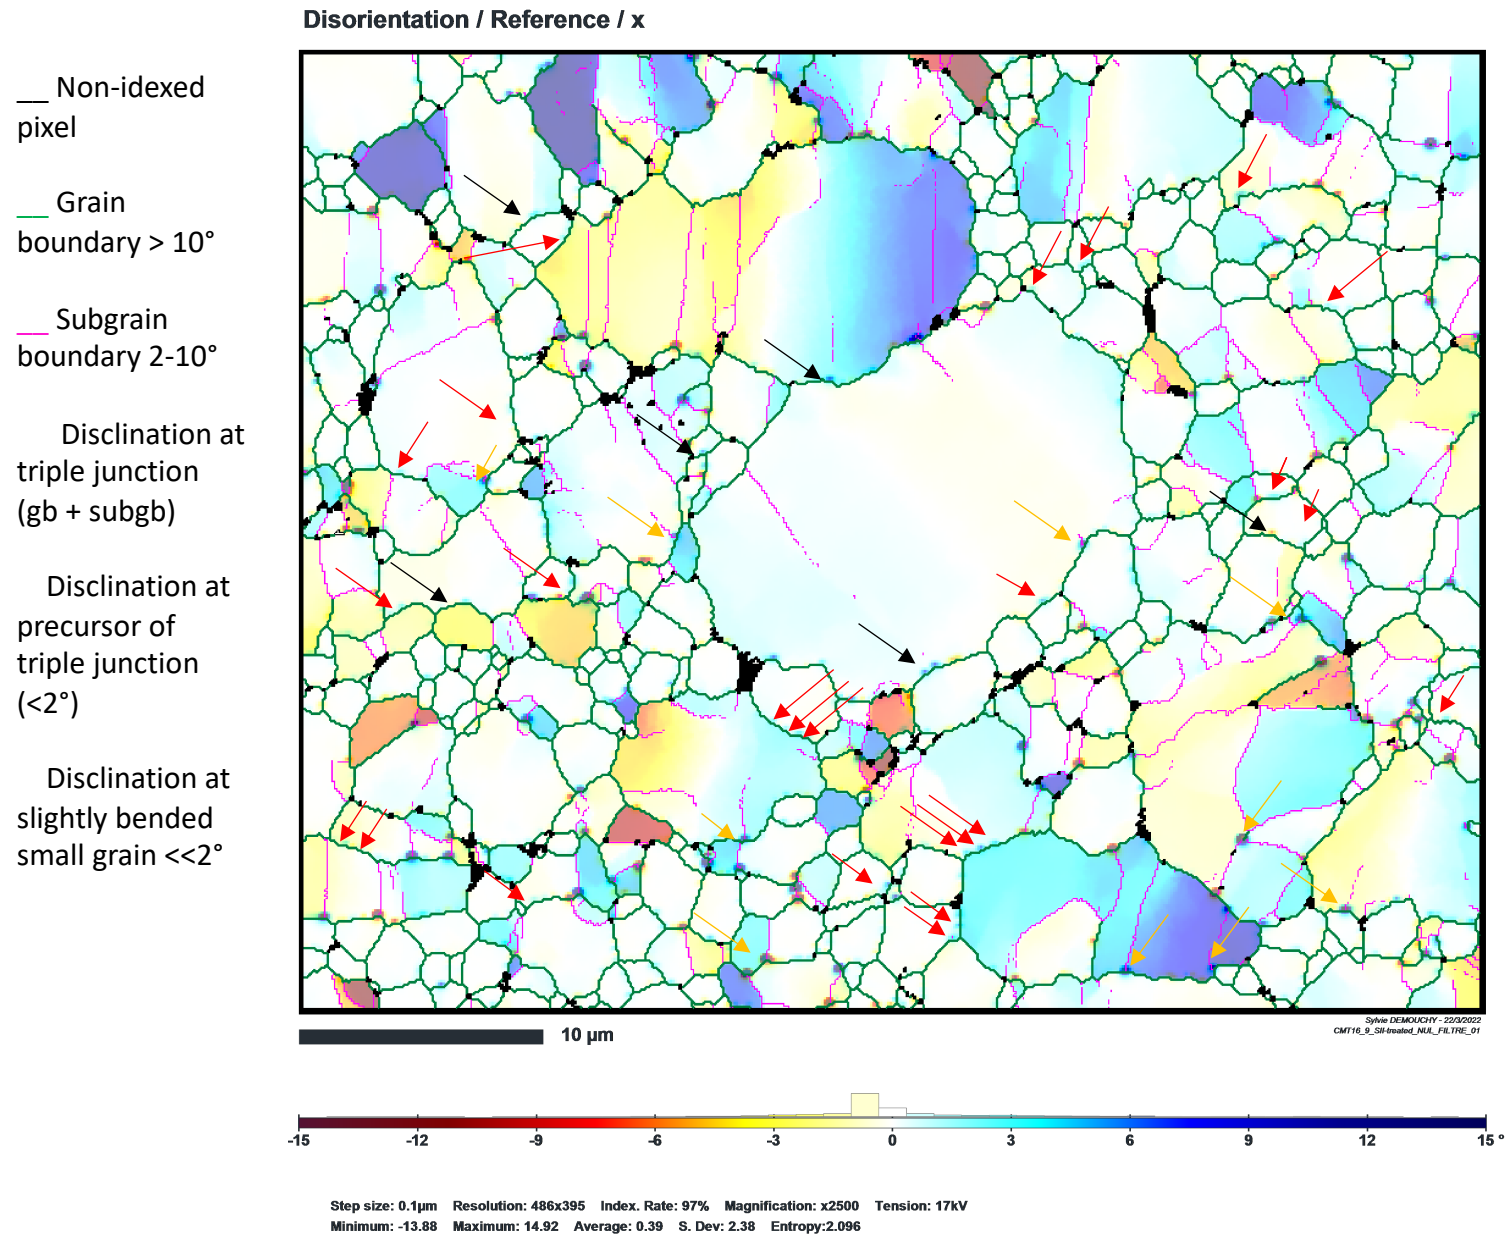

Fig. S2c

### 33 component Of Disclination Tensor

- Non-indexed pixel
- Grain boundary  $> 10^\circ$
- Subgrain boundary  $2-10^\circ$
- Disclination at triple junction (gb + subgb)
- Disclination at precursor of triple junction ( $< 2^\circ$ )
- Disclination at slightly bended small grain  $< 2^\circ$

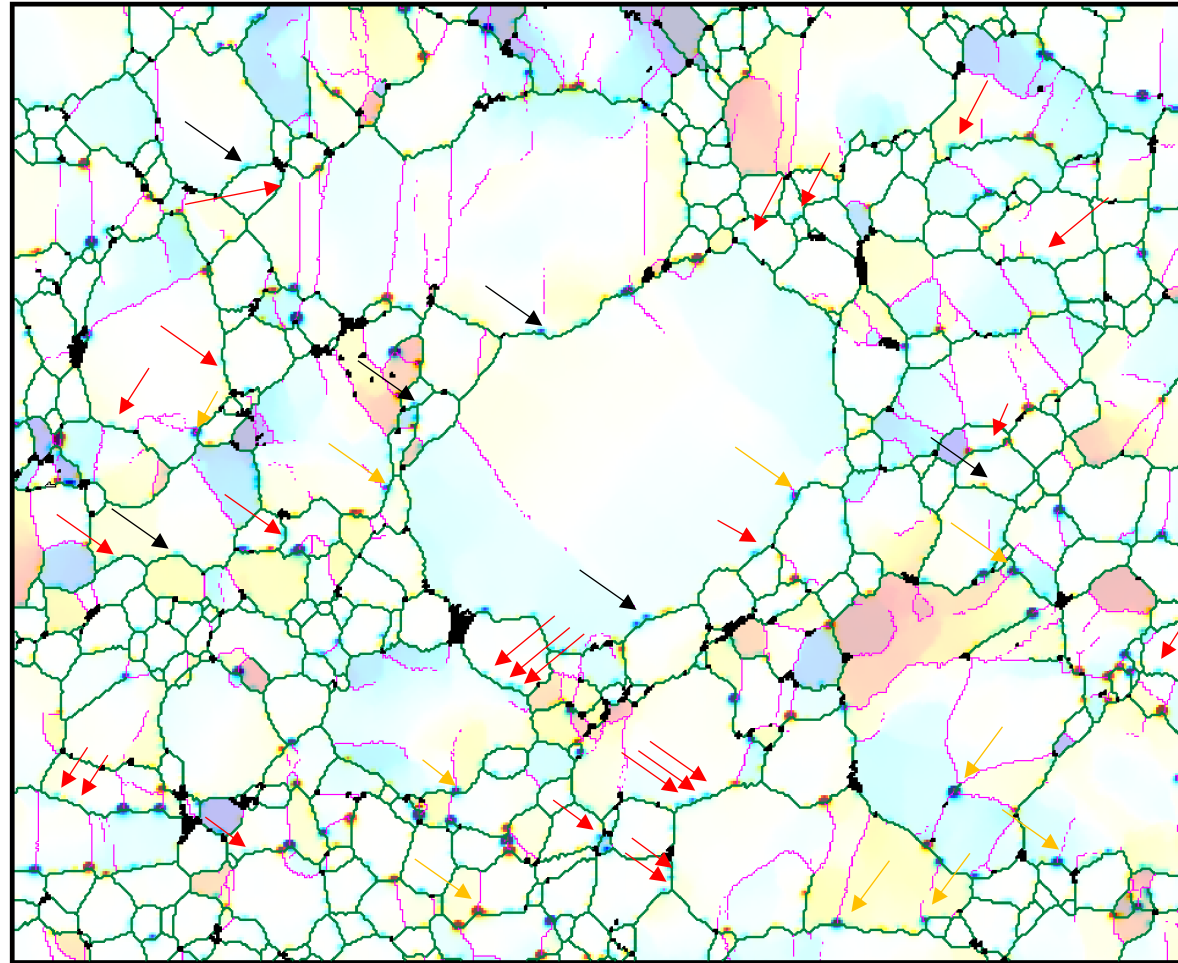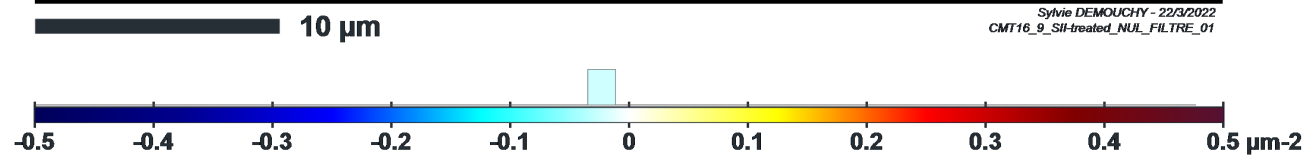

Step size: 0.1μm Resolution: 486x395 Index. Rate: 97% Magnification: x2500 Tension: 17kV  
 Minimum: -19.05 Maximum: 16.75 Average:  $-6.5 \times 10^{-4}$  S. Dev: 0.22 Entropy: 0.183

Fig. S2d

### 33 component Of Disclination Tensor

- Non-indexed pixel
- Grain boundary  $> 10^\circ$
- Subgrain boundary  $2-10^\circ$
- Disclination at triple junction (gb + subgb)
- Disclination at precursor of triple junction ( $< 2^\circ$ )
- Disclination at slightly bended small grain  $< 2^\circ$

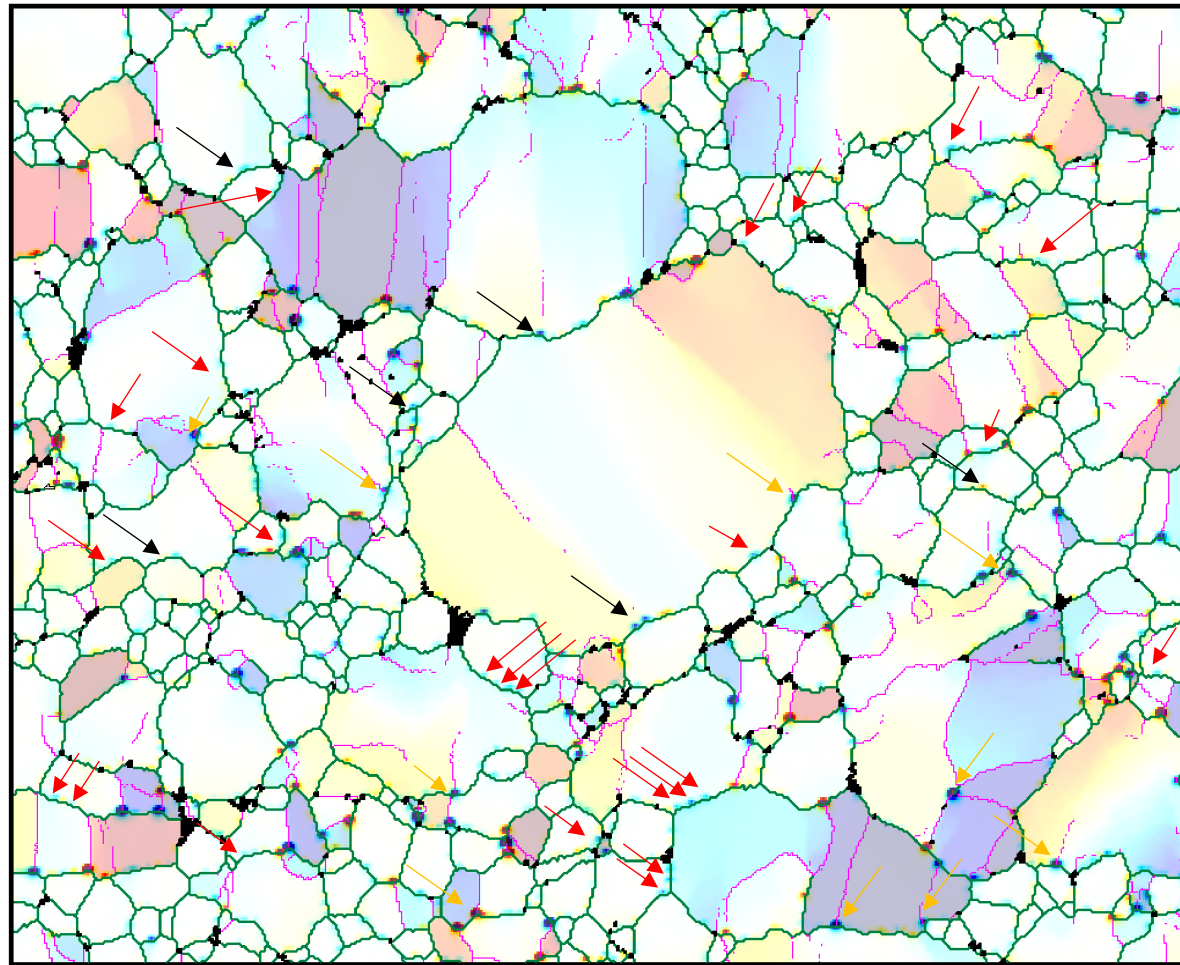

Sylvie DEMOUCY - 22/3/2022  
CMT16\_9\_SiH-treated\_NUL\_FILTRE\_01

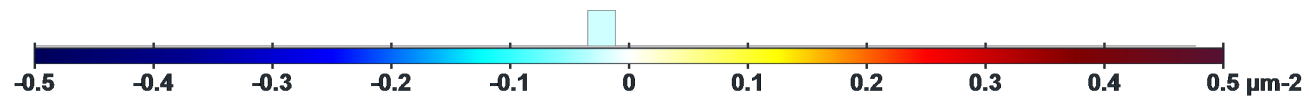

Step size: 0.1μm Resolution: 486x395 Index. Rate: 97% Magnification: x2500 Tension: 17kV  
Minimum: -19.05 Maximum: 16.75 Average:  $-6.5 \times 10^{-4}$  S. Dev: 0.22 Entropy: 0.183

Fig. S2e

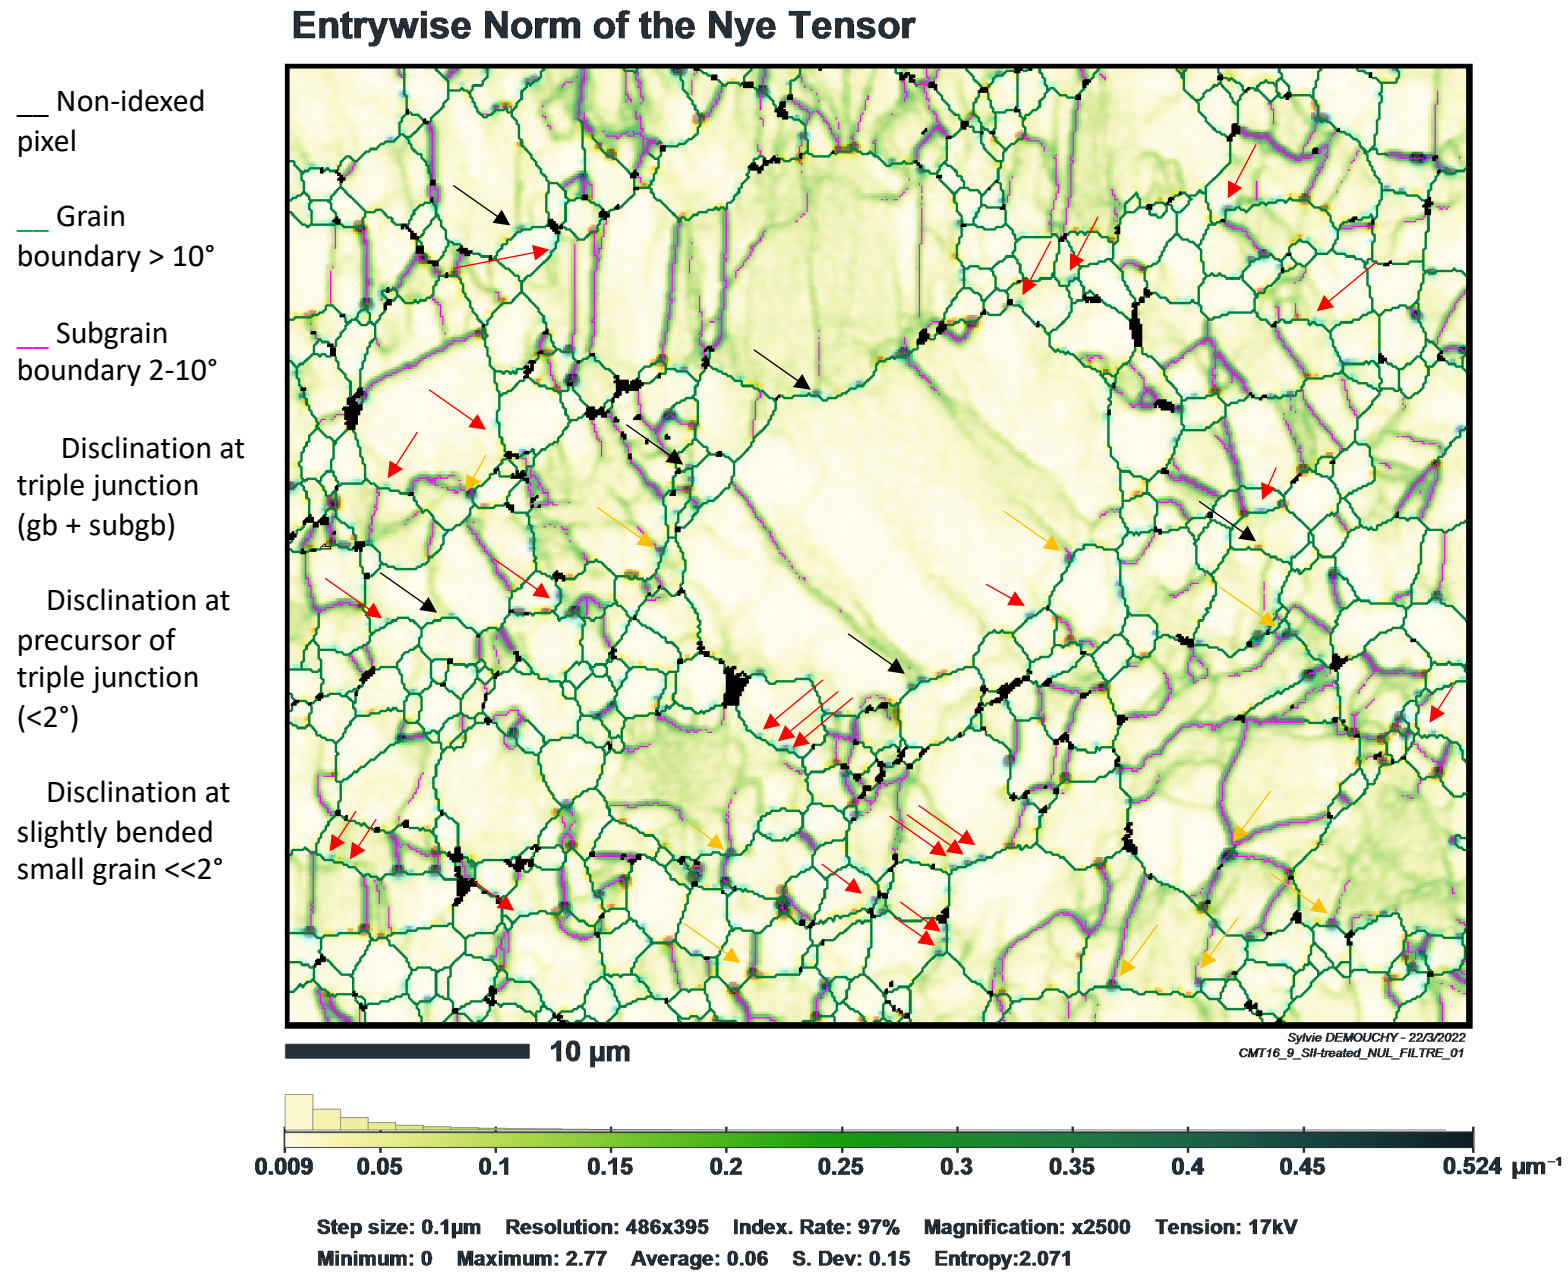

Supplement: Supplementary file 1 [file ejm-35-219-2023-supplement.zip › Fig_S2_jan2023.pdf]
