# Supplementary material for: Dislocation and disclination densities in experimentally deformed polycrystalline olivine
Source: Copernicus journal article supplement (doi:10.5194/ejm-35-219-2023), 2023-03-31
Supplement: Supplementary file 1 [file ejm-35-219-2023-supplement.zip]

Archive with 4 entries (4 files):
- ejm-35-219-2023-supplement-title-page.pdf
- Fig_S1_jan2023.pdf
- Discli_investigations_jan2023.xlsx
- Fig_S2_jan2023.pdf
