# Supplementary material for: Dislocation and disclination densities in experimentally deformed polycrystalline olivine
Source: Copernicus journal article supplement (doi:10.5194/ejm-35-219-2023), 2023-03-31
Supplement: Supplementary file 1 [file ejm-35-219-2023-supplement.zip › Discli_investigations_jan2023.xlsx]

## Sheet: Table S1
Table S1: Dislocation densities (a) and disclination densities (q) for each investigated EBSD map from average pixel values, but for different step size (from acquisition or resampling using ATEX)
Mean angular deviations are reported we recall that for all maps MAD_min=0 and MAD_max = 2° during acquisition)
	step size	Nb of grain	X size	Y size	Map Surface	MAD	MAD
	mm	check	cell	cell	mm2	average	median
Starting Material						0.37	0.63
CMT16-7_SII	0.1	202	412	311	12813.2	0.37	0.35
Axial Deformation
CMT16-6_SIII	0.1	385	472	384	18124.8	0.42	0.37
CMT16-8_SV	0.1	122	437	177	7734.9	0.38	0.34
CMT16-8_SVI	0.07	105	468	230	7534.8	0.37	0.33
CMT16-8_SVI	0.1	105
CMT17-2_SI	0.1	82	480	164	7872	0.4	0.36
CMT16-12_SIII	0.06	48	343	280	5762.4	0.37	0.34
CMT16-12_SIII	0.1	48
CMT16-13_SII	0.05	45	225	333	3746.25	0.46	0.4
CMT16-13_SII	0.1	45
CMT16-13_SII	0.2	45
CMT16-13_SIII	0.1	268	252	392	9878.4	0.38	0.33
CMT16-13_SIV	0.1	121	249	294	7320.6	0.41	0.36
CMT16-9_SII	0.1	315	486	395	19197	0.47	0.43
Torsion
PI0546-III	0.1	772	476	738	35128.8	0.63	0.56
PI0546-VII	0.1	285	486	366	17787.6	0.58	0.53
PI0546-XVII	0.07	179	418	570	16678.2	0.46	0.42
PI0546-XVII	0.1	179
PI0546-V	0.062	189	687	399	16995	0.6	0.54
PI0546-V	0.1	189
PI0546-VIII	0.1	276	542	449	24335.8	0.56	0.52
PI0546-XVI	0.07	185	473	410	13575.1	0.45	0.42
PI0546-XVI	0.1	185			13575.1
PI0546-IX	0.1	277	526	449	23617.4	0.57	0.53
PI0546-XIV	0.07	42	174	271	3300.78	0.51	0.47
PI0546-XIV	0.1	37
PI0546-XVIII	0.07	170	521	627	20253.4	0.54	0.5
PI0546-XVIII	0.1	170

## Sheet: CMT16-7_SII
																	Min	19980295400
	CMT-16-7	One point per grain	Average	0.00982367													Average	2.56255e+11
	nb grains =	202	Median	0.00408364													Median	146771887000
Grain	q13	q23	q33	rqtotal	ac11	ac12	ac13	ac21	ac22	ac23	ac31	ac32	ac33	rac1j	rac2j	rac3j	rac total	rac total	grain size	grain surface	grain perimeter
ID	(in mm-2)	(in mm-2)	(in mm-2)	(in mm-2)										(in mm-2)	(in mm-2)	(in mm-2)	(in mm-2)	(in m-2)	mm	mm2	mm
1	-0.000363685	0.00041011	0.000360239	0.000655919	0.00166224	0.00475314	-0.00378647	0.00110934	0.00366075	0.00441679	0.00328609	-0.00219193	0.00032861	0.102019	0.0918688	0.0580663	0.251954	2.51954e+11	7.72089	46.8182	24.256
2	-0.0231414	0.0269112	-0.0143544	0.0382856	0.000344663	-0.00212336	-0.00079589	0.0027427	-0.000535126	-0.000263336	-0.000678082	0.00114049	-0.0034957	0.0326391	0.0354116	0.0531427	0.121193	1.21193e+11	0.895622	0.63	2.81369
3	-0.000550402	0.000413583	0.000573298	0.000895914	0.000443966	0.000995528	0.000899852	0.000451607	-0.000448133	-0.00434769	-0.00382855	-0.000120243	0.00461044	0.0233935	0.0524743	0.0855923	0.16146	1.6146e+11	7.68604	46.3982	24.1465
4	0.0010364	0.000998084	-0.00145832	0.00204865	0.00213656	0.00231561	-0.00347593	0.00237477	0.000172518	-0.00292528	0.00736871	-0.000696525	-0.00726263	0.0792809	0.0547256	0.153279	0.287285	2.87285e+11	4.80466	18.1303	15.0943
5	0.00262646	-0.0020879	-0.00315956	0.00460873	0.00378159	0.00364725	0.000534519	-0.00372097	-0.00215631	-0.00181321	-0.00213614	-0.00101081	-0.000924292	0.0796336	0.0769048	0.0407125	0.197251	197250887000	0.930485	0.68	2.92321
6	-0.00231255	0.00548548	0.00845234	0.0103383	-0.000857071	0.00164446	-0.00129752	0.000629137	-8.43652e-05	-0.000799623	0.000317752	-0.00103541	-0.000279669	0.0379905	0.0151313	0.0163283	0.06945	69450038100	0.805824	0.51	2.53158
7	-4.51132e-05	-0.00053946	0.00185732	0.00193461	-0.0172224	0.000215084	-0.030906	0.00801577	0.00494992	0.011511	0.0105962	0.00127047	0.0185482	0.483435	0.244766	0.304149	1.03235	1032349934000	1.97708	3.07	6.21118
8	-0.00330232	0.00321433	0.000570039	0.00464351	7.96613e-05	-0.0012316	0.00120757	0.00120331	-0.000563087	0.000149025	-0.00195151	-0.00117778	-0.00024213	0.0251884	0.0191543	0.0337142	0.0780568	78056783200	3.10459	7.57008	9.75339
9	0.00121047	-0.000157405	-0.00133801	0.00181116	0.00095733	-5.90597e-06	-0.000213148	-0.000690815	0.00145345	-7.88189e-06	-0.000319288	-0.000984451	-0.00118829	0.0117638	0.0215215	0.0249203	0.0582056	5.82056e+10	2.29035	4.12	7.19536
10	-0.00024351	0.00257033	0.00268837	0.00372736	-0.00150661	-0.00087316	-0.000768047	-0.000440079	0.000785534	0.00148842	-0.00112126	0.000693615	-5.70576e-05	0.0314782	0.0271403	0.0187194	0.0773378	77337827200	3.07785	7.44008	9.66939
11	-0.00226153	0.00408121	-0.000356588	0.00467953	0.00397402	-0.0017171	-0.00100718	-0.000760104	0.000650234	-0.00443466	0.000820881	-0.00153515	1.71687e-05	0.066983	0.05845	0.023732	0.149165	149165071400	1.80893	2.57	5.68293
12	-8.79154e-05	-0.00237027	0.00279399	0.00366501	-4.71076e-05	0.000314696	0.000261995	0.000508895	0.00246662	0.000744595	0.000753549	0.00304506	-0.00252261	0.00623798	0.0372011	0.0632121	0.106651	106651204900	1.77338	2.47	5.57126
13	-0.00352602	0.00134129	-0.00120243	0.00395951	0.00180025	-0.00104933	-0.00278031	-0.00223065	0.00183181	-0.000150845	-0.00174298	0.00227573	0.00135616	0.056299	0.042133	0.0537487	0.152181	1.52181e+11	1.91825	2.89	6.02636
14	0.00142362	-0.001096	0.00111771	0.00211593	-0.00135943	0.00384297	-0.000685734	0.000824375	8.04305e-05	0.00183421	-0.000144657	0.00288872	0.00122554	0.0588813	0.0273902	0.0425892	0.128861	128860679900	2.45406	4.73001	7.70968
15	-0.00386112	0.000670001	0.00362312	0.00533705	-0.000497804	0.00105644	0.00130792	-0.000247727	-0.00335899	0.00156778	-0.00106421	-0.0035015	0.0017129	0.0286216	0.0517449	0.062786	0.143153	1.43153e+11	1.60373	2.02	5.03828
16	0.00041851	0.0016274	0.00131226	0.00213204	0.00255213	0.00387371	0.0133679	-0.00616218	-0.0139826	-0.00405652	0.00419306	-0.00291902	-2.91867e-05	0.197937	0.242013	0.0714126	0.511363	511362846900	8.54785	57.3864	26.8539
17	-0.00574702	-0.00595899	0.00271827	0.0087136	0.000905013	0.000407596	0.00345205	0.000640339	-0.00237136	0.00208021	0.00405349	0.000512745	-0.000974761	0.0476466	0.0509191	0.0554099	0.153976	153975630000	1.26157	1.25	3.96334
18	-0.000159408	0.00211923	-0.00159822	0.00265911	-0.00119563	0.000537537	-0.00226019	-0.000812334	-0.00278366	0.00195078	-0.00103192	-0.000257005	0.0014855	0.0399335	0.0554677	0.0277443	0.123146	1.23146e+11	1.028	0.83	3.22957
19	-0.000106726	0.00691009	0.0137365	0.015377	0.00376958	-0.00113948	-0.00456773	-0.00351792	0.00478001	-0.000794403	0.000612572	0.0114934	-0.0100939	0.0947678	0.0909233	0.221999	0.40769	407689748000	0.836829	0.55	2.62898
20	-0.00207955	-0.00193887	0.0023107	0.00366375	0.00250008	0.00110452	-0.000328646	-2.17689e-05	-0.000444422	0.00162552	0.0012206	0.00217892	-0.00125384	0.0393325	0.0209171	0.0465335	0.106783	1.06783e+11	2.34529	4.32	7.36796
21	0.00185047	-0.00285461	-0.000247353	0.0034109	-0.00125146	-0.00024696	7.05994e-05	0.000441386	-0.00164376	-0.000838617	-0.00236856	0.00175021	0.00146238	0.0156902	0.0292376	0.0558115	0.100739	1.00739e+11	1.65067	2.14	5.18576
22	0.000346188	3.36964e-05	0.000889601	0.000955181	2.04841e-05	0.00211535	-0.000700432	-0.00275677	-7.94112e-05	0.00011717	0.00104928	-0.000202393	0.000701964	0.0283627	0.0295335	0.0195364	0.0774326	77432572100	9.0868	64.8555	28.5471
23	-0.00119867	-6.64807e-05	0.000326001	0.00124399	0.0011411	-0.000686569	0.00268725	-0.00169291	2.58526e-05	0.0011726	0.00220063	0.00106696	-0.000244735	0.0451491	0.0289136	0.0351233	0.109186	109185948400	0.902703	0.64	2.83593
24	0.00384326	-0.00114949	0.0152222	0.0157419	-0.000480824	0.00177325	0.00415536	-0.000500191	0.00343989	0.00205466	-0.000528361	-0.000472714	-7.82088e-05	0.0640943	0.0599474	0.0107928	0.134835	1.34835e+11	1.88477	2.79	5.92118
25	0.00411778	-0.00425831	0.000392782	0.00593663	-0.00340668	-0.00223789	0.000456492	0.000101203	0.00187123	-0.00188409	0.000282307	-0.00308549	-0.0013518	0.0610106	0.0385653	0.0471959	0.146772	146771887000	1.69257	2.25	5.31737
26	-0.000571665	-0.00663691	-0.000523495	0.00668202	-0.00127392	-0.00174514	0.000173467	-0.00204605	0.00100868	0.00184304	-0.0023824	0.00574985	-0.00159295	0.0319252	0.0489777	0.097252	0.178155	178154933000	1.71127	2.3	5.37614
27	0.00319705	0.0143635	-0.007817	0.0166625	-0.000598714	0.00683348	0.00196017	0.00471014	-0.00966496	-0.00683583	0.00068391	-0.000447938	-0.0026695	0.0939236	0.212109	0.0380135	0.344046	344046415000	0.451352	0.16	1.41797
28	0.000678671	-0.000624338	-0.000449821	0.00102603	-0.00331285	-0.00227188	-0.00295891	0.00452297	0.00198345	-0.0115985	-0.00037911	0.00470203	-0.00309615	0.0854364	0.181049	0.081773	0.348258	348258162000	2.8923	6.57005	9.08645
29	0.00230808	0.000534682	-0.0032878	0.0040525	0.020267	0.015845	0.0295205	-0.00378072	-0.00881907	-0.00428212	-0.0141886	-0.009406	-0.024819	0.656324	0.168819	0.484136	1.30928	1309280120000	1.26157	1.25	3.96334
30	-0.000519708	-0.000921164	0.00515307	0.00526049	-0.000492664	-0.000501552	-0.00315131	-0.000967185	-0.00237859	8.82657e-05	-0.000659966	0.000472538	0.00162741	0.0414553	0.0343404	0.0275991	0.103395	103394790700	1.80188	2.55	5.66078
31	0	0	0	0	0.00143918	0.00111664	0.000147299	-0.000108736	0.000969416	-0.00188404	-0.00208229	-0.00189566	-0.001888	0.0270312	0.0296219	0.0586595	0.115313	1.15313e+11	0.677027	0.36	2.12695
32	-0.00216088	-0.00425093	0.00573261	0.00745672	0.00685551	-1.02982e-05	-0.00070552	-0.00223938	-0.0110556	0.00314991	0.00188152	0.00141964	-0.00788163	0.0757133	0.164448	0.111828	0.35199	3.5199e+11	1.14518	1.03	3.5977
33	-0.000492905	-0.00184462	-0.000427019	0.0019565	-0.00196481	0.00216913	-0.000319961	0.000655408	0.00239329	0.00117568	-0.000838203	0.000246582	0.00167866	0.044539	0.0422438	0.0276345	0.114417	114417259000	2.68924	5.68004	8.44852
34	-0.00277575	0.0011639	0.000883729	0.00313695	0.00197932	-0.00413088	0.00178801	0.00523471	-0.00333994	6.8826e-06	0.00145363	-0.00268737	-0.000850982	0.0789822	0.0858153	0.0499198	0.214717	2.14717e+11	3.03824	7.25007	9.54495
35	0.00103271	-0.00248839	-0.000468442	0.00273459	-0.000355471	0.000659411	0.00239024	0.000246177	-0.0022527	-0.000949967	0.000931698	0.000861752	0.000799561	0.0340512	0.0344885	0.0259301	0.0944699	94469852000	2.17926	3.73	6.84636
36	0.000100598	0.000214132	-0.00187285	0.00188774	-0.000921217	-0.000925551	-0.000300226	0.000205026	0.00137213	0.000535662	-0.000529016	-0.000336155	0.000696783	0.0214699	0.0211282	0.0156195	0.0582177	58217664000	3.00879	7.11007	9.45241
37	0	0	0	0	-6.31114e-05	-0.00306825	0.000239164	0.00323949	-0.00016176	-0.00458702	-0.00508081	0.00393702	-0.003019	0.0337052	0.0798827	0.120368	0.233956	233956160900	0.422201	0.14	1.32639
38	-0.000372943	-0.0001034	-0.000231701	0.00045107	0.00142484	0.000138678	-0.000437596	-0.00052571	0.000611333	0.000180557	-0.000724212	-0.000712029	-0.000660758	0.0200112	0.013176	0.02097	0.0541571	5.41571e+10	6.8439	36.7898	21.5008
39	-0.0653707	0.0819325	0.0589735	0.120267	0.00624169	0.00299504	0.000978726	0.00670893	0.000335819	0.00449199	-0.0109279	-0.00179653	-0.00704444	0.102155	0.115367	0.197688	0.41521	415210256000	0.338514	0.09	1.06347
40	0.00105162	-0.00283095	-0.000520435	0.00306448	-0.00184151	0.00130858	-0.00133442	-0.000273885	-0.000232176	-0.000208642	-0.00016341	0.00141097	0.00160258	0.044845	0.00714703	0.0317696	0.0837616	8.37616e+10	1.29149	1.31	4.05734
41	-0.01433	0.00513218	0.00247311	0.0154209	0.000591903	0.00296943	-0.00211206	0.00159153	0.00016221	-0.00281126	0.00155469	0.00131762	-0.00321142	0.0567339	0.0456501	0.0608373	0.163221	163221274000	0.881292	0.61	2.76867
42	0.000452704	-0.000737884	-0.000340749	0.000930336	0.000294126	-0.00148687	0.000621667	-0.0003947	0.000974253	0.000253365	0.000704553	0.000776026	-0.000971401	0.0240266	0.0162232	0.0245198	0.0647696	64769624000	3.94135	12.2002	12.3822
43	0	0	0	0	0.00632169	0.00264031	0.00279522	-0.00200531	-0.000598636	0.00181082	-0.0100929	-0.00486719	-0.00480322	0.117572	0.0441476	0.197633	0.359353	3.59353e+11	0.374241	0.11	1.17572
44	0.00324103	-0.00442819	0.00449036	0.0070906	-0.000109695	0.00217518	-0.00257303	-0.00232459	-0.000219678	-0.00386743	0.00150015	5.26425e-05	-0.00215322	0.0485791	0.064117	0.0370602	0.149756	149756234500	2.8119	6.21005	8.83386
45	0.000524841	-0.00229973	-0.00258056	0.00349621	0.0112159	0.00964674	-0.011615	0.00777666	0.000399934	-0.0165292	0.00122808	0.000745453	-0.0161686	0.324776	0.247058	0.181422	0.753256	753255821000	1.72239	2.33	5.41106
46	0.000580492	-0.00403827	-0.000535468	0.00411477	-0.00171589	-4.21157e-05	0.000973608	-8.77408e-06	-0.000513457	0.00128943	0.000374317	0.00159797	0.00103433	0.0273161	0.0181166	0.0300662	0.0754989	75498931090	4.19482	13.8202	13.1785
47	-0.00126646	0.00084525	0.00112421	0.00189267	9.56648e-05	0.00138289	-0.00676187	0.000858672	0.00290403	0.00062833	0.00504203	-0.00311737	0.000212179	0.0824042	0.0439103	0.0837157	0.21003	2.1003e+11	5.82305	26.6305	18.2937
48	0.00036239	-0.00056191	0.00266925	0.00275172	0.00244572	0.000223774	0.000696554	0.00221587	-0.00287457	0.000262726	0.00122119	-0.000113937	0.00106074	0.0336605	0.0535318	0.0239587	0.111151	1.11151e+11	0.821472	0.53	2.58074
49	0.00124014	-0.0211085	0.00263185	0.0213081	0.00117545	-0.00117248	0.00315925	-0.000957643	-6.87438e-05	0.00275256	0.000486048	0.000596221	0.00155958	0.0550718	0.0377895	0.0264185	0.11928	119279806400	3.03198	7.22007	9.52527
50	-0.00337695	-0.0199987	0.0419141	0.0465633	-0.0080551	0.00017745	0.00343368	-0.0080701	-2.36072e-05	0.00158632	-0.000479258	0.00357449	-0.00104671	0.116662	0.0968002	0.0510046	0.264467	2.64467e+11	0.225676	0.04	0.708983
51	-0.0016935	0.000196169	0.000423944	0.00175675	0.000103709	0.000398363	-0.000125269	-0.000281928	-0.00156635	-0.00010759	0.000774902	0.000447645	-9.96241e-06	0.0062734	0.0195586	0.0123251	0.0381571	38157132060	3.3833	8.99011	10.629
52	0.00138108	-0.00139014	-9.98773e-05	0.0019621	-0.00159914	0.00113884	-2.60026e-06	0.000212013	-0.000309008	-0.000809173	0.000134053	-0.000218956	0.00172165	0.0274058	0.0133019	0.0207466	0.0614543	61454348640	2.10193	3.47	6.60343
53	0.000282009	-0.00062403	-0.00189567	0.00201557	-0.000268962	0.00103658	0.000390281	0.00102552	0.000563254	0.000167395	-0.00120271	-0.000788091	-0.00215638	0.0169582	0.0175617	0.0414717	0.0759916	75991628000	2.32348	4.24	7.29945
54	-0.00720038	-0.00295088	0.00540269	0.00947324	1.47213e-05	0.00152404	0.00652133	-0.000462255	-0.00200599	-0.00243893	0.00115047	-0.000435035	0.000641947	0.080601	0.0490717	0.0222746	0.151947	151947242400	1.55127	1.89	4.87346
55	6.12397e-05	0.00281977	0.000451689	0.00285638	-0.00881911	0.000897244	0.00450338	-0.00156307	-0.00124192	-0.00609033	0.00154017	-0.00527121	0.00463242	0.142197	0.0889531	0.114438	0.345588	345588353000	6.40415	32.2106	20.1193
56	0.00211543	-0.000737819	-0.00126046	0.00257064	0.000200778	0.00235079	-0.000516649	0.00179701	0.000253802	-0.000167621	-0.000739779	0.000620872	0.00198504	0.0306821	0.0221843	0.0334569	0.0863233	8.63233e+10	1.53891	1.86	4.83463
57	-0.00350865	0.00277694	-0.000436454	0.00449584	0.000616736	0.00235933	0.00291255	0.00142383	-0.000124055	-0.000989984	0.00246193	0.00116418	-0.000865695	0.0588862	0.0253787	0.044918	0.129183	129182934000	1.62737	2.08	5.11255
58	0.000743047	0.0369095	-0.0050065	0.0372549	-0.0202509	-0.0208631	0.00770989	-0.00453708	0.0195788	0.0035788	-0.0314668	-0.0141655	0.0229265	0.488239	0.276946	0.685587	1.45077	1450772620000	2.00903	3.17	6.31156
59	0.00116519	0.000256349	0.00187732	0.00222435	0.00627134	0.00121122	0.00551308	-0.00026431	-0.00507391	-0.00190898	-0.000250444	-0.00548317	0.00257749	0.129956	0.072472	0.083111	0.285539	285539407000	4.23405	14.0802	13.3017
60	0.00103176	-0.000495291	-0.00135491	0.00177359	-0.000617171	-0.00201923	-0.00347187	-0.00232726	0.000446664	-0.000403504	0.00481935	-0.00319796	-0.000656524	0.0610827	0.0317743	0.0867384	0.179595	179595353000	5.05891	20.1004	15.8931
61	0.000326715	0.00110596	0.0102714	0.010336	-0.00460584	0.00536054	-0.00458819	0.00146922	-0.00184283	0.00137818	0.00822195	-0.0111189	0.00789115	0.145546	0.0469023	0.27232	0.464768	464767760000	2.82545	6.27005	8.87643
62	0.000454906	0.000292271	-0.000315305	0.000625923	-0.00259717	-0.000759985	2.57823e-05	-0.00120162	0.00223152	-0.000726201	0.000625093	-0.00230693	-0.00219885	0.0338294	0.0415934	0.0513087	0.126731	126731479300	0.789865	0.49	2.48144
63	-0.00669473	0.0114983	5.16679e-05	0.0133053	-0.000250342	-0.000477861	0.0024512	0.00116607	0.00143378	-0.00244694	0.000626913	0.000142112	-0.000252937	0.031794	0.050468	0.0102196	0.0924816	92481634000	1.17806	1.09	3.701
64	0.0129442	0.0055836	-0.000763684	0.0141178	-0.000278554	-0.000461912	0.00120988	0.000324421	0.000262353	0.000577615	0.000544168	-0.00168036	-0.00364283	0.0195035	0.0116439	0.0586736	0.089821	8.9821e+10	0.836829	0.55	2.62898
65	-0.00220878	0.0118494	0.00179963	0.0121871	-0.00111086	-0.000866143	-0.00061288	-0.000890036	0.000487319	2.85847e-05	-0.00036361	0.000447155	0.00126826	0.0258989	0.0140594	0.0207902	0.0607485	6.07485e+10	2.36421	4.39001	7.4274
66	0.00841475	0.00377293	0.015114	0.0177052	-0.0032785	0.00907826	0.00473219	0.0216926	0.0200999	-0.00842266	-0.0209117	-0.00930945	0.0132368	0.17089	0.502152	0.43458	1.10762	1.10762e+12	2.0248	3.22	6.36112
67	0.000958498	-0.000730193	0.0035083	0.00370946	-0.000701944	0.00229663	-0.00236885	-0.00470018	0.000431812	-0.00553585	0.00053368	0.000502196	0.000336252	0.0536743	0.106678	0.0137213	0.174074	174073933000	1.28159	1.29	4.02625
68	-0.00110873	0.00583091	-0.000312859	0.00594363	0.00162163	0.00226492	-0.000399346	0.000119445	0.00218123	-0.00112478	0.00147549	0.00753761	-0.00277748	0.042859	0.0342546	0.117906	0.195019	195019330000	2.23693	3.93	7.02755
69	0.00134107	-0.000221332	0.00603482	0.00618599	0.0021552	-0.00275554	-0.00141385	-0.00440547	0.00362148	0.00161232	-0.00201791	0.000632995	0.00130425	0.0632459	0.0963928	0.0395515	0.19919	199190282000	2.21405	3.85	6.95565
70	-0.0133338	0.0181062	-0.0239206	0.0328302	0.000104346	-0.00230974	0.00969362	0.000741176	0.0026288	-0.00831696	-0.0065097	-0.0010065	-0.00219023	0.121077	0.116869	0.0970644	0.335011	3.35011e+11	1.0823	0.919999	3.40017
71	0.000472427	0.000973268	-0.00142472	0.00178893	-6.65812e-05	0.00101739	3.25101e-05	0.00191689	0.000186381	-9.04088e-05	0.000850008	-0.000940209	-0.000615058	0.0111648	0.0219368	0.0240528	0.0571544	5.71544e+10	3.39453	9.05011	10.6643
72	-6.66166e-05	0.00122024	0.00124508	0.0017446	-0.000810604	-0.000259779	0.000170153	-0.000692994	0.000179995	-0.000803071	0.000896124	-0.00145437	-0.000337548	0.0124054	0.0167606	0.0268804	0.0560464	5.60464e+10	3.68239	10.6502	11.5686
73	0.000446994	-0.000461386	-0.000117176	0.000653002	0.00114205	0.000803964	-0.00093344	0.000305466	0.000950716	-0.000167421	-0.00132424	-0.000849737	-0.00150104	0.0287946	0.014236	0.0367502	0.0797808	7.97808e+10	3.28784	8.4901	10.3291
74	-0.00210819	3.48929e-05	-0.00180861	0.0027779	-0.00150372	0.000554783	-0.000561838	-7.45108e-05	0.00028591	-0.0025647	-0.001252	-0.00127052	-0.00134781	0.0262034	0.0292512	0.0387033	0.0941579	9.41579e+10	1.92487	2.91	6.04716
75	-0.000583545	-0.00423417	-0.00102168	0.00439461	0.000258472	0.00295525	-0.00237397	0.00250772	-0.0103701	-0.00397546	0.0229786	0.00280084	-0.00148293	0.0558769	0.168533	0.272624	0.497034	4.97034e+11	7.33552	42.2589	23.0453
76	0.00255761	-0.00521612	0.00585393	0.00824729	0.0024539	7.38659e-05	-0.00135778	0.000268	-0.000447011	0.00215864	0.0001957	0.00109165	-0.00104871	0.0388554	0.0287365	0.0233605	0.0909525	90952456100	2.14095	3.6	6.726
77	-0.00189376	0.00213239	0.00168279	0.00331137	-0.000774285	0.000621712	-0.00243838	0.000899757	0.00383401	0.000912772	9.92968e-05	0.00109639	0.00105624	0.0383438	0.0564654	0.0225192	0.117328	1.17328e+11	1.70007	2.27	5.34095
78	0.00122313	-0.01033	0.00237681	0.0106702	-0.000778346	-0.00863707	0.000984217	0.00369424	0.0114484	-0.00063738	-0.00353117	-0.00509114	-0.00308227	0.103996	0.1578	0.117046	0.378842	3.78842e+11	0.851907	0.57	2.67635
79	0.00370519	-0.000812172	-0.00200842	0.00429207	-2.27819e-05	-0.000141895	0.000428566	0.000446958	-0.000476537	-0.000206684	9.68207e-05	-0.000152799	-2.49887e-05	0.00593243	0.0113018	0.00274608	0.0199803	19980295400	2.05291	3.31	6.44943
80	0.000112411	-0.00622987	-0.00241663	0.00668311	0.00131956	0.00450168	-0.00633876	-0.00262849	0.0154137	0.00270302	-0.00429631	-0.000613664	-0.0027795	0.1216	0.207453	0.0768948	0.405947	405947309000	3.02566	7.19007	9.5054
81	0	0.000878131	-0.00174941	0.00195743	-0.000588539	-0.000360994	0.000213706	-0.0020598	-0.000386004	0.00176248	0.00209332	0.00013733	-0.00141849	0.0116324	0.0420829	0.0364914	0.0902066	9.02066e+10	0.930485	0.68	2.92321
82	0.0180953	-0.00147958	-0.0284566	0.0337551	0.00246306	0.00166553	-0.00135415	-0.00138485	-0.000471245	0.00109426	-0.0105066	-0.00272623	0.0050994	0.0548275	0.0295036	0.183322	0.267653	2.67653e+11	2.72452	5.83004	8.55934
83	-0.000725778	-0.00133987	0.000871124	0.00175524	-0.00133388	-0.000309715	-0.000641353	0.000450317	0.00018302	0.00173803	-0.000711607	-0.000156245	0.0012306	0.0228495	0.0237136	0.0209845	0.0675477	6.75477e+10	1.7662	2.45	5.54868
84	0.000663849	-0.00148906	8.81043e-05	0.00163271	-0.000662355	0.00145358	-0.00032703	0.00175357	0.000327688	-0.000806505	-0.000461135	-0.000506383	0.000123823	0.0244297	0.0288776	0.0109134	0.0642207	6.42207e+10	2.29315	4.13	7.20415
85	0.000559778	0.000805684	-0.000425768	0.00106947	-0.000162922	0.000587029	-0.00350769	-0.00593714	-0.0018631	0.0070247	0.000473855	0.00320744	-0.00491229	0.0425764	0.148249	0.0859359	0.276762	2.76762e+11	5.25649	21.7004	16.5138
86	0.000995269	-0.00358038	0.0023838	0.004415	-0.00173112	0.00142885	-0.00038019	-0.000298876	0.00177648	0.000844099	-0.00270271	0.000514079	0.00309412	0.0354016	0.0291945	0.0631091	0.127705	127705190000	1.20478	1.14	3.78494
87	0.000634874	0.000594128	0.000960993	0.00129598	-0.000270688	-0.000708849	-4.84006e-05	0.000550283	-0.000479289	-0.000507199	-0.00048136	-0.00180407	-0.000816598	0.0102794	0.0153677	0.0310203	0.0566674	56667396300	2.2652	4.03	7.11635
88	0.000389402	0.00091829	0.00414872	0.00426694	0.00168364	-0.00307425	0.00267056	-0.00433471	0.0010582	0.000268641	-0.00874699	0.000338814	-0.000598126	0.0742846	0.0566155	0.0968393	0.227739	2.27739e+11	4.79794	18.0803	15.0732
89	-0.0360225	0.0252242	-0.00917268	0.0449224	-0.000533093	0.00104752	-0.00106101	0.00178991	0.0029638	0.000219573	-0.000603102	0.00128268	-0.00293677	0.0264162	0.0497328	0.0482255	0.124375	1.24375e+11	1.13961	1.02	3.58019
90	0.00220744	-0.00389598	0.000211385	0.00448287	0.00107812	0.00364707	-0.000633882	0.0022635	-8.87406e-05	0.000818816	-0.00307497	0.000597561	0.00166264	0.0535908	0.0317106	0.0533517	0.138653	1.38653e+11	1.43619	1.62	4.51194
91	0.00280998	-0.00337882	-0.00329783	0.00549437	0.000864553	0.00225408	0.00256028	-0.00014783	0.00203731	-0.0015473	-0.0033488	0.00619154	-0.000995812	0.0567892	0.0373244	0.105362	0.199475	199475108000	3.42816	9.23012	10.7699
92	-0.00400637	0.0259258	-0.0189904	0.0323858	-0.00302924	-0.0024347	-0.00239114	0.00296255	0.00240117	3.21171e-05	-0.00199198	-0.000281171	0.0021568	0.0785507	0.0539585	0.0442996	0.176809	176808775400	0.422201	0.14	1.32639
93	0.00126287	-0.00262185	2.35134e-05	0.00291024	0.000557522	-0.00456316	-0.000336897	-0.00253363	-0.000729242	0.00370011	0.000307129	0.00114991	0.0020807	0.0545758	0.0696298	0.0353774	0.159583	159583015000	1.72608	2.34	5.42267
94	0.000543939	-0.00152726	0.00339121	0.00375881	0.00130241	-5.01455e-06	-0.00105217	-0.00164604	0.00117766	0.000566978	-0.000644192	0.000403495	-0.000475324	0.0235959	0.0339067	0.0152301	0.0727328	72732774510	3.05289	7.32007	9.59096
95	-2.7577e-05	0.00056841	0.000553813	0.000794078	-0.00400258	0.00208226	-0.00174298	-0.00393707	0.000797987	-0.00336139	0.00128279	0.00186071	0.00201363	0.0782783	0.0809645	0.0515714	0.210814	2.10814e+11	10.2572	82.6192	32.224
96	0.00163637	5.40915e-05	-0.000281092	0.00166122	-0.00533277	0.00333193	-0.00531614	-0.00162547	2.6178e-05	-0.00189596	0.00482495	0.00161541	0.00627347	0.139808	0.0354761	0.127138	0.302423	302422869600	2.41222	4.57001	7.57822
97	-0.00100494	0.000781372	0.00153184	0.00199173	0.00432332	0.000878709	0.000177303	0.000622481	-0.000255443	-0.000860437	-0.00439942	0.000946076	0.000355249	0.0537933	0.0173836	0.0570074	0.128184	1.28184e+11	7.33057	42.2089	23.0297
98	-0.00712526	-0.00192427	0.018676	0.0200814	-0.00136704	-0.00374508	-0.00258012	0.00364507	0.00108328	0.0019032	-0.00249256	-0.000292092	-0.00291483	0.0769224	0.0663154	0.0569949	0.200233	200232750000	0.607651	0.29	1.909
99	0.000736718	0.000607702	0.00065704	0.0011592	-0.00742526	0.00369418	-0.00116507	0.00289652	0.0003789	0.00441238	6.08391e-05	-0.00322034	-0.00120591	0.122845	0.076878	0.0448709	0.244594	244593942400	6.44275	32.6005	20.2405
100	0.000609747	-0.000674666	0.000330689	0.000967637	0.00129023	0.000549883	0.000967361	0.0025786	0.00129205	-2.67825e-05	8.87236e-06	-0.00139882	-0.000992901	0.0280747	0.0389744	0.0240059	0.091055	91054994980	2.49268	4.88002	7.83099
101	-0.00100174	0.00296331	-0.0012029	0.00335137	0.00323627	0.00657121	-0.0074037	-0.0042886	0.0187398	-0.00878588	-0.00293354	0.00402342	-0.00631284	0.172112	0.318143	0.132698	0.622952	6.22952e+11	3.02357	7.18007	9.49884
102	0.00357901	-0.00349807	0.00146725	0.00521523	-0.00243067	0.00360435	0.000182438	0.00190556	-0.0013001	-0.00298045	-0.00165443	-0.00452344	-0.00187295	0.0621745	0.0618611	0.0805082	0.204544	204543715000	1.26157	1.25	3.96334
103	-0.00300745	0.000659678	0.000789584	0.00317858	-0.000583556	-0.000520662	0.00113316	-0.0014404	0.000993209	-0.00132256	9.64114e-06	-0.00127299	-0.00188291	0.0223738	0.0375617	0.0316554	0.091591	91590960390	0.829186	0.54	2.60497
104	0.000944722	0.00223891	-0.00298015	0.00384533	0.00187978	0.00108982	-0.000996633	0.000210388	-0.00166556	-0.00218512	0.000193662	4.77169e-05	0.000212277	0.0396623	0.0406107	0.00453656	0.0848095	84809539400	1.33511	1.4	4.19439
105	0.000116129	-0.00136029	-0.00153412	0.00205363	-0.000948109	0.000733037	-0.00113832	0.000189411	-0.0011324	-0.000356285	-0.000820049	-0.00123753	0.000768476	0.0281947	0.0167809	0.0282606	0.0732362	73236192000	3.3492	8.81011	10.5219
106	0.000247406	0.000461002	-0.00273368	0.0027833	-0.000379674	-0.000853745	0.00139843	0.000123901	0.000278724	-0.000198597	-0.000289568	4.27699e-05	0.000276543	0.0263185	0.00601223	0.00608881	0.0384195	3.84195e+10	2.67977	5.64003	8.41877
107	0.000743411	-0.0012961	-0.000467723	0.00156566	-0.000538317	-0.00156851	0.00184527	0.00071164	0.000421179	0.000234555	-0.00173203	0.00125772	0.00151561	0.039521	0.0136737	0.0450535	0.0982482	9.82482e+10	1.01554	0.809999	3.19042
108	0.0159751	0.00292086	-0.016594	0.0232184	-0.00485299	-0.00130838	0.0016368	0.00712718	0.00294477	-0.000557283	-0.00474454	-0.00230123	0.000709013	0.0779818	0.106292	0.0775478	0.261822	2.61822e+11	2.75475	5.96004	8.65433
109	-0.0007202	0.000802525	-0.000525794	0.00119966	0.00147249	0.00160391	-0.00260429	0.00619994	0.00230349	-0.000968327	0.00414298	-0.00366687	0.00233645	0.0568069	0.0947176	0.101463	0.252987	252987466000	4.79536	18.0603	15.0651
110	-8.26315e-05	0.00112136	-0.00150929	0.00188208	-0.00206815	0.00239429	-0.000129517	0.00110093	0.00089666	-0.000997298	-0.000478509	0.000963178	-0.00135752	0.0459196	0.0299489	0.027992	0.103861	1.03861e+11	2.95325	6.85006	9.27794
111	-0.00559681	-0.00043817	0.0017725	0.00588711	0.000539403	-0.000830923	0.00232004	-0.00170612	0.00204711	0.000724516	0.00193578	-0.000186726	-0.00154062	0.0369037	0.0447775	0.0366313	0.118312	118312433000	1.09981	0.949999	3.45516
112	0.0050474	0.00344347	0.0155135	0.0166734	0.000345336	-0.00121885	-0.000598701	-0.0114231	-0.0141702	0.00432901	0.00794296	-0.0120015	0.00170252	0.0216288	0.299222	0.216469	0.537321	5.37321e+11	2.15576	3.65	6.77254
113	0.000559602	0.000506793	0.00219854	0.00232456	0.000986892	0.000883607	-0.000322516	0.000427484	0.000517275	-0.000828934	0.000144608	5.73266e-05	-0.000184094	0.0219301	0.0177369	0.00386028	0.0435274	43527368300	1.90158	2.84	5.974
114	-0.00187532	0.00123978	0.00283099	0.00361502	-0.000271452	0.00108546	0.00186218	0.00030998	0.00193807	-0.000966282	0.00111883	-0.000566852	-0.000570053	0.0321909	0.0321433	0.0225574	0.0868916	86891585000	0.937302	0.69	2.94463
115	-0.00132491	0.00172527	-0.00142665	0.0026014	-0.000923003	0.00272959	-0.000897315	0.000573277	0.000583267	0.00158666	-0.00819655	-0.000196588	0.00496297	0.0454991	0.0274321	0.133561	0.206492	2.06492e+11	3.53242	9.80013	11.0974
116	0.000283825	-0.00219444	0.000381222	0.00224532	0.00094608	0.000210468	0.000389213	-6.37417e-05	-0.000634326	-0.000284396	0.000775075	1.7742e-05	0.00154762	0.0154576	0.00982464	0.0234043	0.0486866	4.86866e+10	1.65453	2.15	5.19787
117	9.83743e-05	-0.00369684	0.00348308	0.00508017	-0.00179198	0.00794091	0.0030952	-0.00168316	0.00211247	-0.000981535	-0.000183299	1.80674e-05	-0.000774219	0.128281	0.0477716	0.00975585	0.185808	1.85808e+11	0.944069	0.7	2.96589
118	-0.00183498	-0.00348422	-0.00232693	0.00457401	-0.00172854	-0.00088354	0.0011265	-0.00112282	0.00149286	-0.000596523	-0.000517343	0.000662514	-0.00117448	0.0373858	0.032122	0.0235433	0.0930512	9.30512e+10	1.5676	1.93	4.92476
119	0.000813961	-0.000408906	-6.64587e-05	0.00091332	6.86219e-05	0.000356616	0.00101709	4.20766e-05	0.00132654	-0.000306404	0.0011145	-0.000169416	-0.000378143	0.0144233	0.0167502	0.0166206	0.0477941	4.77941e+10	2.38567	4.47001	7.49481
120	-0.00621466	-6.32677e-05	0.00399347	0.00738741	0.00667825	-0.00904922	0.00182775	0.0020545	-0.000949728	-0.0104622	-0.00249088	-0.0160165	0.0056566	0.175552	0.134664	0.24164	0.551856	551856043000	3.74243	11.0002	11.7572
121	0.000890181	0.000446504	0.000777804	0.00126363	-2.02054e-05	-0.00111115	-0.000503002	-0.000138606	0.00117114	3.25324e-05	-0.00127508	-0.00145441	9.60059e-05	0.0163436	0.0134228	0.0282549	0.0580213	5.80213e+10	2.22265	3.88	6.98269
122	-0.000287698	-0.000709089	0.000323569	0.000830827	0.00296702	0.0010637	0.00159449	0.00254338	0.00186524	-0.000124016	0.00126389	0.00158444	-8.04767e-05	0.056252	0.0453263	0.0292881	0.130866	130866294100	2.65589	5.54003	8.34373
123	0.00997867	0.00654882	0.00418088	0.0126468	0.00687981	0.00575784	-0.0115735	-0.00181375	0.00825048	-0.013404	-0.00600332	-0.00185467	0.000541721	0.242111	0.234682	0.0839971	0.560791	560790571000	6.14735	29.6806	19.3125
124	0.00271219	-0.00104205	0.00536945	0.00610515	-0.0050822	-0.00487213	0.00161471	0.00657961	0.00204614	-0.00626472	-0.00077713	-0.00565904	-0.00411694	0.11569	0.148905	0.105531	0.370126	370126048000	1.57973	1.96	4.96288
125	-0.0196062	-0.00156692	0.000749907	0.0196831	0.00208586	-0.00260985	-0.00584072	-0.0031953	0.0013181	0.00221283	0.00154332	-0.000489756	-0.00107749	0.105364	0.0672623	0.0311057	0.203732	203732303000	0.406843	0.13	1.27814
126	-0.00571263	-0.00338129	0.00379654	0.00764729	0.000817363	-7.38668e-05	0.0015939	-5.48093e-05	0.00120748	-0.00369323	0.000671621	-0.000925863	-0.00118027	0.0248513	0.0495552	0.0277775	0.102184	102184024500	0.881292	0.61	2.76867
127	0.00506047	0.00119324	-0.00186918	0.00552504	0.00191331	0.00152715	-0.000623733	-0.000469862	4.67521e-05	-0.00164036	-0.000428041	0.00149019	6.00775e-05	0.040642	0.0215698	0.0197831	0.0819949	81994858500	2.73852	5.89004	8.60333
128	-0.00522172	0.0135168	-0.0111251	0.0182684	0.000186356	0.00102487	0.00247193	-0.00113679	-0.00227279	-0.00159623	-0.000981534	-0.00186642	0.00042598	0.0368316	0.0500581	0.0327394	0.119629	119629076000	1.53476	1.85	4.8216
129	-0.0012924	0.000260975	-0.00266379	0.00297224	0.00267261	0.00392625	-0.00118727	0.000674949	0.00103499	-0.00064522	0.00179055	0.000574496	-0.000885814	0.0778612	0.0235516	0.0325086	0.133921	1.33921e+11	1.34935	1.43	4.23911
130	0.00122857	-4.50012e-06	-0.00186235	0.00223109	0.00108614	-0.000597771	0.000444517	0.000159152	0.00186122	-0.00081197	0.0016736	0.000536199	-0.00186037	0.0212843	0.0283234	0.0407017	0.0903094	90309432000	1.43175	1.61	4.49799
131	-0.0050183	-0.0118006	0.00518874	0.0138333	0.0030316	0.000674331	0.00100168	0.001988	-0.00188226	0.000221839	-0.000575063	-0.00160676	0.00107573	0.0470762	0.040921	0.0325756	0.120573	120572776000	0.686366	0.37	2.15629
132	-0.00533302	-0.00594846	-0.00184758	0.00819993	0.0056232	0.00189046	-0.00209415	-0.00193701	-0.00467929	0.00232852	-0.00292594	0.000589403	-0.00383663	0.0960781	0.0894481	0.0735198	0.259046	259045955000	0.983697	0.76	3.09038
133	-0.0230643	0.000293603	-0.00177686	0.0231345	0.00392653	-0.0136847	-0.00661352	0.0030473	0.00251075	0.0124165	-0.00292334	-0.000964609	0.00389103	0.242248	0.179746	0.0777898	0.499783	499783119000	2.79148	6.12005	8.7697
134	-0.00673715	0.000284446	-0.000132824	0.00674446	-0.00440379	-0.00111215	-0.000104485	-0.00386778	0.00039033	-0.00147139	0.00537251	-0.00283296	-0.000791565	0.0562042	0.057295	0.0899704	0.20347	2.0347e+11	0.657953	0.34	2.06702
135	-0.00290742	-0.00102692	0.00183004	0.00358563	-1.57919e-05	-0.00116419	0.00181616	4.71799e-06	0.000895854	-8.76617e-05	0.000615794	-0.000475534	-0.000180602	0.0299614	0.00988233	0.0127193	0.052563	52562994260	2.22552	3.89	6.99169
136	-0.000934614	0.000303892	0.00150794	0.00179993	-0.000124155	0.00141436	-0.000544493	0.000774178	-0.000902161	-0.00112386	-0.000420796	0.000391421	-8.89804e-05	0.0208301	0.028002	0.00901197	0.0578441	5.78441e+10	1.66985	2.19	5.246
137	0.00460784	-0.00264863	0.00446523	0.0069416	-0.000250309	0.000644827	0.00273641	-0.00450129	0.00463533	-0.00318165	-0.00418839	0.00179644	-0.00659772	0.0363155	0.123183	0.125826	0.285324	285323658000	3.7356	10.9602	11.7358
138	-0.00627011	0.0433863	0.00757997	0.0444875	0.00669705	-0.00208445	0.00898421	0.0224396	-0.00680204	0.0286001	-0.00412078	0.00130992	-0.00379701	0.177657	0.578417	0.092277	0.848351	8.48351e+11	1.82993	2.63	5.74889
139	-0.000564118	0.000249906	-1.5784e-05	0.000617196	0.00144377	-0.000433391	0.00138347	-0.00112642	0.000478387	0.000610597	0.00160833	0.00157911	-0.000597985	0.0326063	0.0221541	0.0378542	0.0926145	92614531000	2.0745	3.38	6.51726
140	0.0017488	0.00206405	0.000788293	0.0028178	-0.00109658	-0.000999227	0.000981254	-0.00156578	0.00246385	0.00125733	0.000563728	-0.000201085	-0.00242071	0.0307706	0.0528697	0.0318552	0.115495	115495435000	1.12272	0.989999	3.52715
141	0.0133481	0.00308647	-0.000624133	0.0137145	0.0107453	0.00335119	0.00398185	0.00377495	0.00505556	-0.0172814	0.00311002	-0.00888526	-0.00444474	0.180783	0.261119	0.1644	0.606302	606302480000	3.11074	7.60008	9.7727
142	-0.00192558	0.00423548	0.0828844	0.0830149	0.0289859	-0.00933899	0.00882381	0.00474675	-0.0179848	0.00530661	0.0107427	-0.00937237	0.0241048	0.471487	0.280381	0.442199	1.19407	1194067620000	0.71365	0.4	2.242
143	-0.00311074	0.0028838	-0.00229795	0.00482427	0.00260344	-0.000104672	-0.00137379	0.00407491	-0.00350771	-0.000466475	-0.00342126	0.00375328	0.00243205	0.0408191	0.080491	0.0960659	0.217376	217375976000	1.96091	3.02	6.1604
144	0.000292918	0.00215365	0.00185019	0.00285433	0.000682678	-0.000876818	5.39085e-05	-0.000976169	-0.000562475	-1.19449e-05	-0.000232553	-0.00142024	0.0013768	0.016134	0.0155059	0.0302959	0.0619358	6.19358e+10	2.30421	4.17	7.23891
145	0.00463677	-0.00103038	0.00263447	0.00543155	0.0244272	-0.00141936	0.00480576	-0.0104132	0.0022009	-0.000953442	0.00829067	-0.0144371	0.00100881	0.306523	0.135675	0.237366	0.679563	679563480000	0.930485	0.68	2.92321
146	-0.016976	0.0123913	0.0169759	0.0270169	0.00109157	-0.00108371	-0.00162674	-0.00300992	-0.000131395	0.00239762	-0.00372784	0.000872095	-0.00245983	0.0380201	0.0553894	0.0705977	0.164007	164007179000	2.0185	3.2	6.34132
147	0.000678581	0.00139673	-0.000427092	0.00161051	0.00131033	0.00120607	0.000324927	0.000300544	-0.000252767	-0.000238084	-0.000143881	-0.000459819	-0.001426	0.0284133	0.00791395	0.020297	0.0566242	5.66242e+10	1.43175	1.61	4.49799
148	-0.00539691	-0.00419788	-0.004481	0.00817485	0.0027796	0.000119437	0.00103457	0.000827723	0.00323508	-0.00133047	0.00355964	-0.000632598	-0.00265249	0.039336	0.0539327	0.0684473	0.161716	1.61716e+11	1.2666	1.26	3.97916
149	0.000247753	-0.00246869	0.0157372	0.0159316	-0.00487483	-0.00591356	0.000524519	0.0268875	0.00887626	0.0263794	-0.00740016	-0.00337711	-0.0259191	0.113129	0.621432	0.366964	1.10152	1.10152e+12	2.8367	6.32005	8.91177
150	-1.48011e-05	-0.000407271	-0.00147629	0.00153151	0.00110175	0.000444714	0.00158336	-0.00166476	0.00121125	-0.00078794	-0.00281852	-0.000456048	-0.000988727	0.0312982	0.0366396	0.0426329	0.110571	1.10571e+11	1.43175	1.61	4.49799
151	-0.0109182	-0.00289533	0.00399361	0.0119808	0.00183755	0.00442494	-0.00192619	-0.000934775	0.00204294	-0.00104788	-0.00431024	-0.000547014	0.000562097	0.0818869	0.0402559	0.0541935	0.176336	1.76336e+11	0.881292	0.61	2.76867
152	0.000668854	0.000408896	0.00106392	0.00132154	0.000676653	-0.000895703	0.00105089	-0.000763646	0.000918796	0.00182245	-0.000460392	0.00198859	-0.00101888	0.0262324	0.0350489	0.0346786	0.09596	9.596e+10	3.42816	9.23012	10.7699
153	0.00421015	0.00221131	0.00347546	0.00589017	-0.00437249	0.0103467	0.00448245	0.00621326	-0.0114485	-0.000477987	-0.00169505	-0.00439349	-0.00122473	0.192016	0.181397	0.0731327	0.446546	4.46546e+11	3.46697	9.44012	10.8918
154	0.00151755	-0.000940847	-0.000916916	0.00200721	-0.000493535	0.00134733	0.0011538	-0.000288173	-1.62946e-05	-0.000187682	0.000535873	-0.000424929	-0.00105212	0.0299467	0.00492149	0.0201292	0.0549974	54997408200	1.66604	2.18	5.23402
155	-0.00400634	0.00391198	-0.000251668	0.00560515	0.00445729	0.00197	-0.00323682	0.0022221	0.00508682	-6.86542e-05	-0.00395531	0.00444699	-0.00303247	0.0966412	0.0737758	0.114348	0.284765	284764622400	2.38299	4.46001	7.48641
156	-0.00404967	0.0029919	-0.00271735	0.00572147	0.00321652	-0.00278236	-0.00302689	-0.00634366	0.00613087	0.00387779	0.00464284	0.00400432	0.000623725	0.0902578	0.163523	0.0927088	0.34649	3.4649e+11	1.49696	1.76	4.70286
157	0.00060799	0.0110755	0.0168861	0.0202034	0.00370175	0.0199793	0.0249437	0.00458059	-0.00747848	0.00754246	0.00432314	0.00948594	-0.0393285	0.486247	0.196015	0.531376	1.21364	1213637760000	0.504627	0.2	1.58533
158	5.64954e-05	-9.31966e-05	-0.00131988	0.00132437	0.00110178	0.000819641	-0.00025301	-0.000339006	0.000247204	0.000576191	-0.00150484	-0.00262875	-0.00112988	0.0217443	0.011624	0.0526348	0.0860031	8.60031e+10	3.00669	7.10007	9.4458
159	0.00112725	-0.0089436	0.00510012	0.0103571	-0.00681216	-0.0187174	0.00437025	-0.00246919	0.00138962	0.00982644	0.0150901	-0.00983369	0.0323769	0.298998	0.136852	0.573007	1.00886	1.00886e+12	2.09587	3.45	6.58439
160	-0.0514149	0.00217119	-0.00116741	0.0514739	-0.00217664	-0.00364584	0.0137191	0.00361471	0.0090054	-0.0042891	0.00346342	0.00280229	0.00136876	0.195416	0.169092	0.0763447	0.440853	440852920000	1.88814	2.8	5.9318
161	0	0	0	0	-0.000678982	-0.00137971	0.00215819	-0.00318926	-0.000892139	-0.000241435	0.000857053	0.00108361	-0.00273534	0.0421689	0.0432283	0.04676	0.132157	1.32157e+11	0.356825	0.1	1.121
162	-0.00030288	0.000402684	-0.000209105	0.000545542	6.27685e-05	0.00515029	-0.00438934	-0.00407602	0.00212983	0.000224202	-0.00681498	-0.000134076	0.00727822	0.096024	0.0643005	0.142273	0.302597	302597280300	5.38192	22.7504	16.9078
163	0.035287	0.0193569	0.00763957	0.0409661	-0.00205378	0.00498678	0.00107199	0.00467234	0.00239124	-0.00391425	0.00494062	-0.00287474	0.00556666	0.0811255	0.109778	0.13382	0.324724	324724110000	0.937302	0.69	2.94463
164	0.000171501	0.00278712	0.000768622	0.00289625	-0.00211031	3.12336e-05	-0.00121348	-0.000487889	0.000459552	0.00152668	0.000246179	-4.92754e-05	0.0021519	0.0335502	0.0247412	0.0244736	0.082765	82765005100	1.93148	2.93	6.06793
165	0.00121338	-0.0054909	0.0249142	0.0255409	-0.00808869	-0.00284799	0.00256652	-0.0162928	0.00314258	-0.00596027	0.00480736	0.000716671	-0.00766314	0.135032	0.253956	0.131872	0.52086	5.2086e+11	1.98672	3.1	6.24146
166	-0.0015643	0.00121083	0.00371784	0.00421135	0.00147781	-0.00273257	-0.00486492	-0.00554992	0.00372694	-0.00262512	-0.00409105	0.00165062	0.00290422	0.090753	0.11902	0.0864588	0.296232	296231760000	3.39453	9.05011	10.6643
167	0.00029449	0.0119589	0.00367522	0.0125144	-0.000311828	0.00340623	0.00211367	-0.00192041	-0.00282865	-0.000444863	-0.003521	0.00345814	0.00452932	0.0583173	0.0519392	0.115085	0.225341	225341187000	1.33034	1.39	4.17939
168	0.00210985	-0.0244068	0.000378075	0.0245008	-0.000425396	0.000694874	-0.00228522	0.000272875	0.000677644	-0.00168866	-0.0018583	-0.000956045	-0.000371172	0.0340549	0.0263918	0.0318552	0.0923018	92301844000	0.895622	0.63	2.81369
169	0.00366754	-0.00219145	0.00384793	0.00574977	0.00136654	0.000259207	-9.52386e-05	-2.01945e-05	-0.00100836	0.000670794	-0.000324238	-0.000174951	0.00102264	0.0172099	0.0169935	0.0152183	0.0494217	49421673500	2.06219	3.34	6.47859
170	0.00331948	-0.00223436	0.00160589	0.00431163	0.000348699	0.00103416	-0.00208982	-0.000368651	-0.00106164	0.000415149	-0.000477242	-0.000360762	-0.000129054	0.0347268	0.0184544	0.00967059	0.0628518	6.28518e+10	1.71869	2.32	5.39944
171	-0.00543634	-0.00266688	0.000540651	0.00607934	0.0121788	0.0251184	-0.0258732	-0.00364107	-0.00935024	0.00853768	0.000308539	0.00267748	-0.00404189	0.631704	0.21529	0.0702791	0.917273	9.17273e+11	1.58777	1.98	4.98814
172	0.00160596	0.00128167	-0.00243135	0.00318328	0.00133446	0.000380609	-0.000782082	-0.000601753	-0.00167121	-5.99002e-06	-0.000143065	-0.000145597	-0.00133007	0.0249715	0.0227896	0.0161873	0.0639483	6.39483e+10	2.22265	3.88	6.98269
173	-0.0113416	0.000548524	-0.00479753	0.0123268	0.00116367	-0.00113271	-0.00122485	-0.00018843	-0.000514164	-0.00366047	-0.00103429	-0.000821496	0.00137078	0.0352122	0.0436307	0.0322657	0.111109	1.11109e+11	0.859348	0.58	2.69973
174	0.00045053	-0.000359578	-0.000420495	0.000713505	0.00222373	0.00104109	-0.000784313	0.00550244	-0.00333245	-0.00148749	-0.000511478	0.00245299	-0.00166105	0.0404913	0.103224	0.0462551	0.18997	189970313000	3.41327	9.15011	10.7231
175	-0.00494436	-0.00287338	-0.00160246	0.00593893	-0.000140247	-0.000741072	-0.00123497	-0.00150508	0.00045968	0.000576825	-0.0027503	-0.00168791	0.00132023	0.0211629	0.0254159	0.0575845	0.104163	104163200000	0.356825	0.1	1.121
176	-0.0185454	0.00197314	-0.0249028	0.0311123	-0.000561419	-0.000464826	-0.000670764	0.000488947	-0.00032533	-0.00123572	-0.00064217	-0.00242508	0.000155522	0.0169701	0.0205	0.0322277	0.0696978	69697797000	1.18345	1.1	3.71794
177	-0.00112765	0.0136569	0.0548252	0.0565118	0.00326446	0.0123286	-0.022484	-0.00612518	-0.0126389	0.00804241	-0.00777517	0.00353193	-0.00932188	0.38077	0.268065	0.20629	0.855125	8.55125e+11	1.95115	2.99	6.12973
178	-0.000897388	-0.00170523	-0.0049756	0.0053357	0.00247699	-0.00129716	-0.001007	-0.000413831	-0.00186215	-0.00142711	0.000306852	-0.00102383	0.000979024	0.0478115	0.0370309	0.023097	0.107939	107939396000	1.36342	1.46	4.28333
179	-0.0103307	0.0165343	0.0196358	0.0276707	-5.38439e-05	0.000909906	0.0045396	-0.000761871	0.00328482	0.000292267	0.00517321	0.00532561	0.00181452	0.0550335	0.0433896	0.123133	0.221557	221556518600	1.72239	2.33	5.41106
180	-0.00160922	0.0204815	-0.0296291	0.036055	-0.000515684	0.0015457	9.75809e-05	0.00246824	0.00255998	0.000797808	-0.00407719	-0.00258424	-2.79371e-05	0.0215896	0.0582603	0.0668937	0.146744	146743556600	1.2153	1.16	3.81799
181	0.00368384	0.0042517	-0.00467238	0.00731291	-0.00118391	0.00154152	-0.000464367	0.00423881	0.00201354	0.00254003	-0.00137699	-0.000274931	0.000394202	0.031898	0.0879238	0.0204612	0.140283	1.40283e+11	1.40028	1.54	4.39913
182	-0.00358382	0.0344559	0.00814601	0.0355866	0.000928622	0.000177773	0.00192639	-0.00121222	-0.00314839	0.00129858	0.00170669	-0.000440073	0.000869851	0.0303279	0.0565919	0.0301661	0.117086	1.17086e+11	1.18345	1.1	3.71794
183	0.001979	0.0246465	0.00913667	0.0263599	-0.000650401	0.000229601	-0.000208263	7.45242e-05	0.00102099	0.00135172	-0.000357587	-0.000935305	-0.00178451	0.0108827	0.0244724	0.030774	0.0661291	6.61291e+10	0.789865	0.49	2.48144
184	0.00226543	-0.00385717	0.00896576	0.0100197	-0.000513443	0.000183227	0.000656868	-0.000539821	-0.00231418	0.00156792	0.0020319	0.0023004	0.00204927	0.0135354	0.0442192	0.0638157	0.12157	121570243000	1.33034	1.39	4.17939
185	-0.0030808	0.000981396	0.000498098	0.00327148	-0.00563396	-0.00181203	-0.00119693	0.0127817	0.00179159	-0.00121287	-0.00258379	0.00118667	0.00179563	0.0864291	0.157862	0.0556609	0.299952	299951810000	2.2511	3.98	7.07206
186	0.000784594	-0.000289373	0.00114288	0.00141616	0.00478714	-0.00310601	0.00422493	0.00445029	-0.00335521	0.006084	-0.0026544	0.00317502	0.0033579	0.121181	0.138895	0.0918732	0.351949	351948970000	1.63907	2.11	5.1493
187	-0.000733457	0.000700916	-0.000551798	0.00115487	0.000914921	0.00277977	0.00405701	0.00125083	-0.00282137	0.00102292	0.00221593	0.000834805	-0.00200033	0.077517	0.0509511	0.0505107	0.178979	1.78979e+11	1.57165	1.94	4.93751
188	0	0	0	0	0.000837245	-0.0038679	-0.00387777	-0.00208828	0.00707728	0.000635119	-0.000209881	0.00281231	0.000800056	0.0858291	0.0980068	0.0382225	0.222058	222058407000	0.504627	0.2	1.58533
189	0.0244465	-0.00577526	0.00217228	0.0252132	-0.0424226	0.0369731	0.0227591	0.0460004	-0.0413039	0.00266557	0.0530265	0.0418393	-0.00108132	1.02155	0.899699	0.95947	2.88072	2880717100000	0.607651	0.29	1.909
190	-0.000610637	0.000445694	0.000648643	0.000996122	-0.000760519	0.000722268	0.000720148	-0.0101586	-0.00759914	-0.00152729	0.00525891	0.00683822	0.00194937	0.0220293	0.19285	0.140465	0.355345	355344638000	1.42283	1.59	4.46997
191	0	0	0	0	0.000124407	0.00089044	-0.00231303	0.00088664	-0.00206102	0.00148293	-0.0010979	0.000301903	-0.00137435	0.0332788	0.0443059	0.0277416	0.105326	1.05326e+11	0.628255	0.31	1.97373
192	0.0275072	-0.0995471	-0.0675775	0.123422	-0.000723644	-0.00156984	0.00113052	-0.00113038	0.000875228	-0.00202002	-0.00278195	0.000602068	-0.00194312	0.03424	0.0402563	0.0532714	0.127768	127767667000	0.374241	0.11	1.17572
193	-0.00157205	0.000588865	0.00192862	0.00255689	-0.00501852	-0.00221563	-0.00519215	0.00478238	0.0065763	0.00142055	-0.00273546	-0.000608151	0.00285652	0.124263	0.127792	0.0620014	0.314057	314056724000	1.06451	0.889999	3.34427
194	0.00381978	0.0141701	-0.00880597	0.0171151	0.0104628	0.0252324	-0.00496723	-0.00257258	-0.0105167	0.0047668	-0.000214104	0.00348826	0.00850854	0.406623	0.17856	0.122109	0.707293	707292879000	0.618039	0.3	1.94163
195	-0.00120212	0.000326113	0.000651776	0.00140579	0.000238078	0.000202213	0.000665267	-0.00131091	0.000976254	0.000233587	-6.7669e-05	-0.000634513	-0.000140796	0.0110556	0.0252075	0.00842978	0.0446929	44692893800	1.24634	1.22	3.91549
196	0.00366818	0.00138034	0.00376506	0.00543475	0.00411254	0.002388	0.00225949	0.00352611	0.00246943	-0.00493457	0.0055371	-0.000961047	-0.0011963	0.0876003	0.109301	0.0769445	0.273846	2.73846e+11	0.552791	0.24	1.73665
197	0.000734231	-0.00076105	0.000453124	0.00115048	-0.00796311	-0.00148822	-0.0061613	0.00248306	0.00259471	0.00624164	0.0152985	-0.00142658	0.01638	0.156126	0.113194	0.33105	0.600371	600370510000	1.22573	1.18	3.85076
198	-0.00021078	-0.0133507	-0.0168285	0.0214821	0.00545767	0.00163454	-0.00339769	-0.0321349	-0.00811601	0.009723	0.00094145	0.00602371	-0.0115874	0.104899	0.499739	0.185526	0.790164	7.90164e+11	0.71365	0.4	2.242
199	0	0	0	0	-0.000305722	0.000495849	0.000273539	-0.00148831	0.000333288	0.000307893	0.00155173	0.000641086	0.000173341	0.0107511	0.0212949	0.0236616	0.0557076	5.57076e+10	0.276395	0.06	0.868323
200	0	0	0	0	0.00328592	-0.00316713	0.000856515	0.0012471	0.000476581	-0.0019241	0.00403543	0.000163152	0.00102351	0.0730956	0.0364779	0.0522209	0.161794	161794362000	0.252313	0.05	0.792667
201	0	0	0	0	0	0	0	0	0	0	0	0	0	0	0	0	0		0.195441	0.03	0.613997
202	0	0	0	0	0.00274982	0.00475916	0.00173443	-0.00150571	-0.00250357	-0.00086502	-0.00202908	-0.00393127	-0.00162638	0.0924341	0.0487429	0.0758673	0.217044	217044372000	0.195441	0.03	0.613997

## Sheet: CMT16-6_SIII
																	Min	2.02236e+10
	CMT-16-6_SIII	One point per grain	Average	0.0333378													Average	4.83541e+11
	nb grains =	385	Median	0.0121832													Median	288222211000
Grain	q13	q23	q33	rqtotal	ac11	ac12	ac13	ac21	ac22	ac23	ac31	ac32	ac33	rac1j	rac2j	rac3j	rac total	rac total	grain size	grain surface	grain perimeter
ID	(in mm-2)	(in mm-2)	(in mm-2)	(in mm-2)										(in mm-2)	(in mm-2)	(in mm-2)	(in mm-2)	(in m-2)	mm	mm2	mm
1	0.000214919	-0.00148856	0.00166439	0.00224326	-0.00641605	-0.000735942	-0.0115054	0.00314149	-0.000749416	0.00595252	0.00516817	0.00259558	0.00810036	0.186574	0.0984343	0.158641	0.44365	443649690000	2.59253	5.27882	8.14469
2	-0.000820881	0.000884247	0.0123964	0.012455	0.00946827	-0.0152527	-0.0316791	-0.0243754	0.00214646	0.0230683	-0.00906061	-0.0122086	0.00343735	0.564	0.495901	0.247065	1.30697	1306966520000	2.25506	3.99396	7.0845
3	-0.00316574	0.00810845	-0.00762505	0.011572	0.00685215	-0.00598027	-0.00347658	0.00451564	-0.0119384	-0.00659427	-0.00724103	-0.00376577	-0.0137964	0.16309	0.230483	0.248032	0.641604	641604120000	2.47747	4.82065	7.78321
4	-0.00430728	-0.0185758	-0.0197096	0.027424	0.0067373	-0.00701358	0.00453252	-0.0028057	0.000796438	-0.00282942	-0.000522034	0.0133575	-0.00136376	0.182834	0.0643155	0.152433	0.399582	3.99582e+11	0.819829	0.527882	2.57558
5	0.0020897	-0.00368827	-0.000729518	0.00430144	0.00260932	0.000249881	-0.00231314	-0.00134518	0.000700386	0.00972763	0.00541847	-0.000451265	-0.000387505	0.0517234	0.117732	0.0625724	0.232028	232027787000	8.01444	50.4482	25.1782
6	-0.00745807	-0.309473	-0.0694078	0.317249	-0.00198339	-0.0017511	-0.00255242	0.0349566	0.00518544	-0.00672423	0.0422368	0.00667389	-0.00125646	0.062869	0.468663	0.501672	1.0332	1.0332e+12	0.666223	0.348601	2.09301
7	0.00557936	-0.0348895	0.0805864	0.0879919	0.000527733	-0.00440517	0.00286019	-0.00652447	-0.00543229	-0.00148839	0.00548398	0.000406896	-0.00404004	0.0779309	0.134451	0.0993091	0.311691	311691425000	0.712222	0.398401	2.23752
8	0.2333	-0.0553653	-0.153233	0.28456	0.0054463	-0.00811646	-0.000987343	0.00338255	-0.010357	-0.00951317	-0.00186894	0.00866829	0.00954038	0.145501	0.232527	0.200776	0.578804	578803907000	0.7802	0.478082	2.45108
9	0.0215714	-0.00596363	-0.01609	0.027564	0.0037841	-0.00503872	-0.00277521	-0.024289	-0.00249082	-0.0371338	-0.0149875	0.00472094	-0.00607979	0.11598	0.639136	0.257882	1.013	1.013e+12	3.04468	7.28081	9.56518
10	0.0561126	-0.163773	-0.0510026	0.180476	-0.00677658	0.00322081	-0.0116656	0.00421736	0.00642984	0.00675209	0.00585652	0.00527687	0.0216493	0.21663	0.173993	0.327827	0.71845	7.1845e+11	0.356111	0.0996004	1.11876
11	0.0499758	0.0487596	-0.137249	0.153988	0.000142061	-0.00334759	0.000497363	0.0107926	-0.000559005	0.00567259	0.0025886	-0.00357564	-0.00214249	0.0398702	0.170242	0.0830673	0.293179	293179054000	0.406029	0.12948	1.27558
12	0.00600377	-0.0223281	0.0612544	0.0654729	-0.00488394	-0.00158056	-0.00331269	-0.00471704	-0.00038975	-0.00271766	0.0124546	-0.00106306	0.00679664	0.0977719	0.0782445	0.203143	0.37916	379159801000	1.48118	1.72309	4.65329
13	0.0308466	0.00481456	0.00407431	0.0314849	-0.000326101	-0.00291941	-0.00322387	0.00542213	0.0246845	-0.00180446	0.00184104	-0.0108171	0.00082851	0.0646938	0.319111	0.134867	0.518672	5.18672e+11	1.24384	1.21513	3.90766
14	0.00339994	-0.00259381	0.0080922	0.00915266	-0.00339301	-0.000269451	0.00297772	0.000715853	0.00169725	-0.00264165	-0.0043392	0.000493351	0.00219961	0.0664017	0.0505475	0.0703216	0.187271	187270866000	5.37238	22.6693	16.8779
15	0.0179534	0.0108865	0.00514215	0.0216168	-0.00214662	-0.000474281	-0.00103127	0.000824361	0.00421057	-0.000892739	-0.00332512	0.000738164	0.00135978	0.0365217	0.0592767	0.0542306	0.150029	150029001000	0.738447	0.428281	2.31991
16	0.0254896	0.0832567	-0.392529	0.402071	0.0445859	0.0163177	-0.00661599	0.0331441	0.0095211	0.00713749	-0.0416772	-0.0150462	0.00523379	0.675195	0.498027	0.619573	1.79279	1.79279e+12	0.275842	0.0597602	0.866587
17	-0.00398021	0.00268648	-0.00038874	0.00481772	-0.00872515	0.00438051	-0.0345031	-0.00315783	-0.00860368	0.00385985	-0.0106685	0.00505001	-0.0122755	0.476087	0.156214	0.27994	0.912241	9.12241e+11	1.79828	2.53981	5.64947
18	-0.000555461	-0.00175645	0.00561705	0.00591142	-0.00192397	-0.00424971	-0.00298449	0.00124841	0.000344248	-0.00124464	0.00794213	0.000156125	0.010827	0.0915817	0.0283729	0.189253	0.309207	309207357000	5.97069	27.998	18.7575
19	0.0118132	-0.0195953	-0.0087368	0.024492	-4.95195e-05	0.0031454	-0.00107729	-0.00151244	-0.000401326	-0.00409883	0.000575141	-0.000594068	-0.00646063	0.0427221	0.0601259	0.0762984	0.179146	179146399200	0.406029	0.12948	1.27558
20	0.0134379	-0.0119022	-0.00198061	0.01806	0.00577343	0.00273377	0.00581279	-0.000531948	-0.00117228	0.00202003	0.00106992	0.00208557	0.00247157	0.1432	0.0372426	0.0562706	0.236713	236713198000	0.656637	0.338641	2.06289
21	0.000820795	-0.0138976	-0.0215417	0.0256488	0.00163198	0.00292846	0.00127122	0.000549713	-0.00321623	-0.00229895	-3.88674e-05	0.00216815	0.00126372	0.0583167	0.0606489	0.0347074	0.153673	1.53673e+11	1.15393	1.04581	3.62519
22	-0.0663599	-0.0625103	-0.42117	0.430924	-0.00186272	0.00208285	-0.000140995	0.00219915	-0.00236761	0.00580931	0.000929713	0.00122666	0.00308924	0.0408656	0.103761	0.0524561	0.197082	197082449000	0.616802	0.298801	1.93775
23	-0.00905172	0.00240377	0.015794	0.018362	0.0503836	0.0138796	-0.0286474	-1.46383e-05	0.000769017	-0.0281531	0.00743537	0.0222624	-0.00353781	0.929105	0.289367	0.332356	1.55083	1.55083e+12	2.70972	5.76687	8.51285
24	0.000371844	-0.0303985	-0.0234413	0.0383888	-0.00985533	-0.0197284	0.00242736	0.0123342	0.00455385	-0.0102167	-0.00516075	0.00776462	-0.000318587	0.320111	0.271047	0.13244	0.723598	7.23598e+11	1.77341	2.47009	5.57136
25	0.00504636	0.264644	-0.214537	0.340717	0.00757197	-0.00192744	0.0214137	0.0219247	-2.31767e-05	0.0291478	-0.00761815	0.00177561	-0.0205738	0.309132	0.510957	0.299676	1.11976	1119764156600	0.318516	0.0796803	1.00065
26	-0.0458161	0.00100579	-0.00576412	0.0461882	0.00220925	0.000618716	0.00143425	0.00205683	-0.000180869	0.00529392	-0.00045873	-0.000639451	-0.00011752	0.0426222	0.0753163	0.012157	0.130095	130095497000	1.24384	1.21513	3.90766
27	-0.282904	0.0286111	-0.0390423	0.287015	0.0034114	-0.0045164	-0.000581734	-0.000229828	-0.00166251	0.00370827	0.00200864	0.00886102	0.003515	0.0850953	0.0560061	0.143847	0.284948	284948063000	0.421356	0.139441	1.32373
28	-0.0130843	0.00185263	0.00446861	0.0139499	0.00460593	-0.00158465	-0.00112542	-0.00326728	0.000481962	-0.00792611	-0.0100061	0.00271518	-0.00288275	0.07316	0.116754	0.15604	0.345953	345953356000	1.23361	1.19521	3.8755
29	0.000725522	-0.000795989	-0.00631322	0.00640443	0.00217407	-0.00531902	-0.00637765	0.0042587	0.00597399	0.00912812	-0.00371353	-0.000616219	-0.00303165	0.138707	0.193608	0.073614	0.405929	4.05929e+11	2.14555	3.61548	6.74047
30	-0.00172276	0.00134744	0.00656574	0.00692044	-0.000498257	-0.0224728	-0.0236677	0.000511905	0.016584	0.0250425	-0.00351675	-0.0108747	-0.0050202	0.466387	0.421384	0.194117	1.08189	1.08189e+12	3.13906	7.73898	9.86166
31	0.0529906	0.0111226	-0.0374776	0.0658504	0.00101095	-0.00154104	0.00948296	0.00297582	-0.00294307	0.000462274	0.00236305	-0.000263961	-0.00104275	0.120349	0.0638117	0.0366977	0.220859	220858838000	1.07425	0.906364	3.37487
32	-0.0114914	-0.00403209	-0.00808197	0.014616	0.00388611	-0.00763346	0.0119939	0.00746829	0.0223395	-0.00943728	0.00370443	0.00623865	-0.0179541	0.235135	0.39245	0.278972	0.906556	9.06556e+11	0.835155	0.547802	2.62372
33	0.00879027	-0.0103974	-0.0274381	0.0306305	-8.06984e-05	0.00194731	0.00201442	-1.48807e-05	-0.00424033	-0.0023553	-0.000435548	-0.000826787	-0.000246496	0.0404243	0.0661051	0.0150883	0.121618	121617735900	0.694188	0.378481	2.18086
34	-0.000782712	-0.0026848	-0.00277932	0.00394277	0.00785148	0.00999765	-0.00463121	-0.0146926	0.00011086	-0.00182189	-0.0223889	0.00368878	0.0076907	0.224803	0.166253	0.337684	0.728741	728740642000	4.85408	18.5059	15.2496
35	0.0224371	-0.00684675	-0.0061406	0.0242489	0.00127092	0.00440113	0.00211541	0.00281141	0.00753503	0.000852084	0.000884492	-7.1302e-05	0.000427227	0.0778745	0.111985	0.0138302	0.20369	2.0369e+11	1.82279	2.60953	5.72646
36	-0.00690607	0.00746246	-0.00837682	0.013174	-0.00108518	0.000159555	0.00142976	-0.00335644	0.00310079	0.00457887	0.00154642	2.22394e-05	-0.00201951	0.026745	0.110361	0.0358817	0.172988	172987616500	1.24384	1.21513	3.90766
37	-0.000339291	0.00379357	0.00174659	0.00419009	-0.00709943	-0.00681305	-0.00439497	0.0136552	0.00213981	-0.00204152	-0.0175934	-0.007284	-0.00431375	0.183074	0.178365	0.291912	0.653352	6.53352e+11	5.04494	19.99	15.8492
38	0.0266412	-0.0252746	-0.0146958	0.0395541	0.00249916	0.000234764	-0.00308438	-0.00132914	-0.000496243	0.00566141	0.000173005	0.00178461	-0.000473753	0.058183	0.0748679	0.0243137	0.157365	157364559000	1.27406	1.27489	4.0026
39	0.0200323	-0.02257	-0.0288841	0.041773	0.000946021	0.00225439	-0.000513158	0.00388238	0.00274114	-0.000614429	-0.00219425	0.00218979	0.00106019	0.0371357	0.0723795	0.0544424	0.163958	1.63958e+11	0.464312	0.169321	1.45868
40	0.0254771	-0.010684	0.0268985	0.0385585	-0.00354209	0.0140365	0.0149263	-0.00852691	0.0218347	0.0231325	-0.000443744	0.00390437	0.00212802	0.325049	0.534941	0.0647613	0.924752	924751511000	1.89777	2.82864	5.96203
41	-0.000374823	0.000411098	0.000966529	0.0011152	-0.000970046	0.000786394	0.00316139	-0.00099772	7.72277e-05	0.00196153	9.79093e-06	0.000432168	-0.000945839	0.0491783	0.0303648	0.013878	0.093421	9.3421e+10	1.27903	1.28485	4.01819
42	-0.00324915	7.21e-05	0	0.00324995	-0.00240939	0.000739191	-0.00241233	-0.00161862	-0.00181029	0.00211429	-0.00259928	0.000387203	0.00203136	0.0556091	0.055432	0.0501785	0.16122	161219646000	0.872291	0.597602	2.74039
43	0.041695	-0.0522707	0.00173481	0.0668858	0.00159276	-0.00289134	-0.00181221	-0.00020319	0.00251298	0.00204862	-0.000510931	-0.00114656	-0.00117671	0.0629631	0.0476478	0.0283421	0.138953	138952990000	0.225224	0.0398402	0.707565
44	0.00642625	0.000931724	-0.00342894	0.00734319	-0.00247863	0.0113673	-0.0030799	-0.00580372	-0.00849909	0.0163201	-0.00241409	0.00145865	0.000711555	0.169258	0.306229	0.0458429	0.52133	5.2133e+11	5.1654	20.9561	16.2276
45	-0.0012789	-0.000981458	-0.00216777	0.0027015	0.00645207	0.00107536	-0.00162992	0.000501159	0.00562895	-0.00589793	-0.00164671	-0.00394933	-0.00651752	0.0915734	0.12028	0.121136	0.332989	332989466000	2.11279	3.50592	6.63755
46	-0.00228998	-0.00300197	-0.00122335	0.00396893	-0.00469495	-0.0212913	-0.00134438	-0.00309205	-0.00235981	-0.00362197	-0.00472981	-0.0016466	-0.00783188	0.273306	0.0907384	0.142083	0.506127	5.06127e+11	2.73767	5.88639	8.60066
47	0.0379964	0.0532301	0.151888	0.16537	-0.00482689	0.0105138	0.00290879	-0.000664341	0.00471402	-0.00153633	0.00665929	-0.0203261	0.000314969	0.182495	0.0691468	0.273004	0.524646	5.24646e+11	0.450449	0.159361	1.41513
48	-0.0056713	0.000203795	-0.00729983	0.00924622	0.00286418	0.00192564	0.00268245	-0.00136229	-0.000482883	-0.000853423	-0.000205174	-0.000202789	-0.000897308	0.0747227	0.0269859	0.0130527	0.114761	114761359000	1.13733	1.01592	3.57303
49	0.00637117	-0.00774073	0.0117751	0.0154649	-0.000621994	-0.0014793	0.000572167	-0.000287118	0.00101689	0.00625768	-0.000989969	0.000920162	-0.00257077	0.0267346	0.0756169	0.0448091	0.147161	147160549000	1.03823	0.846604	3.26171
50	-0.00513198	0.006144	-0.00209309	0.00827448	-0.00385942	0.00204422	0.0210055	0.00382847	-0.0256623	0.00045851	-0.0045118	-0.00465833	0.00325793	0.269092	0.299493	0.124281	0.692865	6.92865e+11	2.41002	4.56169	7.57132
51	-0.00150394	0.0130139	0.00770662	0.0151992	-0.00141195	-0.000539838	-0.00208377	0.00101739	0.0119898	0.0199007	-0.000717199	-0.00574823	-0.0117189	0.0403556	0.329079	0.181843	0.551278	551277921000	1.12048	0.986044	3.52009
52	0	0	0	0	0	0	0	0	0	0	0	0	0	0	0	0	0		0.225224	0.0398402	0.707565
53	-0.000217566	0.00494139	-0.00256309	0.00557083	0.0034662	-0.0130057	-0.0231324	-0.0184106	-0.0328194	0.0186634	0.0166838	0.00948396	-0.0122354	0.396043	0.698934	0.384031	1.47901	1479008630000	1.41103	1.56373	4.43288
54	0	0	0	0	-0.000195128	-0.00165558	-0.00486374	0.000360954	0.00106811	-0.00139133	-0.000146435	-0.000360373	0.0009444	0.0671445	0.0282039	0.0145121	0.109861	1.09861e+11	0.225224	0.0398402	0.707565
55	0.0458177	0.0899601	0.0839021	0.131269	-0.00524298	0.0285953	-0.0150775	0.00029593	-0.0319827	0.0536537	-0.0271371	-0.00890772	-0.0118037	0.489158	0.859323	0.478485	1.82697	1826966510000	0.827527	0.537842	2.59976
56	-0.0112047	0.0117412	0.0123723	0.0204077	0.000437131	0.00101113	-0.00125585	-0.00159138	-0.00019639	0.000651847	-0.000386617	9.03664e-05	0.00134679	0.0270411	0.0243962	0.0182377	0.069675	69674982200	1.13733	1.01592	3.57303
57	0.00325968	-0.00142497	0.00217634	0.00417043	-0.00117582	-0.00653925	0.0132503	0.00321957	-0.00174732	-0.00477746	-0.00149656	1.25015e-05	0.00276642	0.209654	0.0974436	0.0427548	0.349852	349852275300	3.70942	10.8067	11.6535
58	-0.0159483	0.00430876	0.00227205	0.0166756	0.00414213	-0.00219839	0.000884533	-0.00619541	0.000406349	-6.31487e-05	-0.00622173	0.00283333	0.000507794	0.0722506	0.0666491	0.0956285	0.234528	2.34528e+11	0.666223	0.348601	2.09301
59	-0.0354703	0.0445875	0.0256182	0.0624698	0.00112337	0.00079261	0.00638932	-0.00151128	0.00316264	-0.000271688	0.000921519	-0.000672243	-0.000757468	0.083053	0.0494561	0.0235123	0.156021	1.56021e+11	0.516054	0.209161	1.62124
60	0.000124282	-0.00110583	0.00164921	0.00198953	-0.000849952	-0.00161316	0.000794473	-0.00140351	0.000354082	0.00188607	-0.000345282	0.000774735	0.000132198	0.0325758	0.0364366	0.0125222	0.0815346	8.15346e+10	10.0631	79.5459	31.6144
61	0	0	0	0	0.000401223	0.000593527	-0.000273166	0.000820241	0.00107103	0.000467867	0.000556584	-0.00154562	-8.59164e-05	0.0126792	0.0235914	0.0218812	0.0581517	5.81517e+10	0.225224	0.0398402	0.707565
62	0.000709944	-0.00402962	-0.00146507	0.00434606	0.000112148	0.000360072	-0.00131542	-0.00256135	0.000868035	-0.000321563	0.00070647	0.000348425	-5.20905e-05	0.0178764	0.0375094	0.0110699	0.0664557	66455693700	1.63578	2.10157	5.13898
63	-0.0241973	-0.0286475	-0.0251496	0.0451519	0.00679289	0.000973016	0.00982694	0.0055073	-0.0156713	0.00238102	-0.00180113	0.000288971	-0.00704653	0.175928	0.235596	0.0913663	0.502891	502890953000	0.373493	0.10956	1.17336
64	0.00195973	0.000420595	0.000118786	0.00200787	0.00184359	-0.00300137	0.00301362	-0.00268999	0.00543033	-0.00393239	0.00238835	-0.00133415	0.00131986	0.0785858	0.120527	0.0504237	0.249537	249536600000	2.2182	3.86448	6.9687
65	0.00319967	0.00648048	0.0350057	0.035744	0.00135917	0.00308841	0.00125245	0.000644943	0.00155709	-0.000224712	0.000504945	0.00130265	-0.00288683	0.0570003	0.0242675	0.0469443	0.128212	128211979000	1.50665	1.78285	4.7333
66	0	0	0	0	0.00193179	0.00463436	0.000559452	0.000528637	0.00272737	-0.00729663	-0.000202587	-0.010008	0.0139083	0.071256	0.105526	0.241189	0.417971	4.17971e+11	0.225224	0.0398402	0.707565
67	0.0148915	0.00629269	-0.117509	0.118615	-0.00985045	0.0030961	0.00109172	-0.0725103	0.0349839	0.0285993	0.0117671	-0.00715192	-0.00343659	0.140383	1.36094	0.223556	1.72487	1724873710000	0.935428	0.687243	2.93874
68	-0.0197749	0.00319801	0.0186375	0.0273611	0.00366071	0.00212441	0.00125205	0.00292616	-0.000837629	-0.00217907	3.27038e-05	0.00196393	0.00205173	0.0703716	0.0594285	0.0404836	0.170284	1.70284e+11	0.490865	0.189241	1.5421
69	-0.00376427	0.000686679	-0.000373641	0.00384459	0.000231307	-0.00159042	0.000125378	0.0011773	-0.000413399	-7.1537e-05	-9.85745e-05	-0.00222393	-0.00109717	0.0194711	0.0166223	0.0341968	0.0702902	7.02902e+10	2.03638	3.25692	6.39748
70	0.00205839	-0.0102701	-0.00857878	0.0135391	-0.00100233	0.00524848	-0.00538728	0.00239981	0.00420676	-0.000277915	-0.00209696	-0.00753607	0.00736247	0.116381	0.0688449	0.169955	0.355181	355180907000	0.574212	0.258961	1.80394
71	0.0294389	-0.0439831	0.230573	0.23657	0.00138863	0.00292443	0.00504875	-0.00129787	0.000312843	0.00197216	0.00191526	-0.000764413	-0.00234533	0.093618	0.0358287	0.05025	0.179697	1.79697e+11	0.646908	0.328681	2.03233
72	0.000153739	0.000243385	-0.00273078	0.00274591	0.000565513	0.000833343	-0.00115825	-0.00624584	-0.000966627	0.00295261	-0.00101364	0.00171695	-0.0185632	0.025571	0.101651	0.212938	0.340159	340159396000	4.46777	15.6772	14.036
73	0.000752593	-0.00719138	-0.00152118	0.00738893	-0.00251269	0.00256021	-0.00191948	0.00289293	0.00228536	-0.00383456	-6.62249e-05	-0.000296695	-0.00246177	0.0699239	0.0901285	0.0282469	0.188299	1.88299e+11	0.88671	0.617522	2.78569
74	-0.00242244	0.001376	0.00739024	0.00789793	-0.000473892	-0.0050912	0.0278504	0.00525986	-0.0302283	0.0134558	-0.0229514	0.0142766	-0.00319213	0.334155	0.48944	0.404201	1.22779	1.22779e+12	4.74174	17.6593	14.8966
75	0.00141083	0.0013558	0.00182985	0.00267899	0.00161306	0.00416102	0.00214377	-0.00225211	0.000566474	-0.00101884	-0.00404837	-0.000356972	-0.00198566	0.0791786	0.0383743	0.06391	0.181463	181462878000	3.205	8.06767	10.0688
76	0.00746318	-0.0655248	-0.103551	0.122768	0.00130774	-0.0192503	0.0236066	-0.0132191	-0.0156849	0.021106	-0.0149209	-0.0105883	0.0386882	0.441646	0.5001	0.641973	1.58372	1583719300000	1.49397	1.75297	4.69346
77	0.00910624	-0.0183138	-0.00491015	0.021034	7.8744e-05	-0.000174956	1.93484e-05	0.000102597	-0.000214546	0.000182676	0.000864467	-0.00174836	0.00223644	0.00273049	0.0049982	0.0484927	0.0562214	56221361700	0.225224	0.0398402	0.707565
78	0	0	0	0	0.00182689	0.00249488	9.94982e-05	-0.00094973	-0.00131473	0.00346001	-0.00153705	-0.00254444	-0.00015396	0.0442127	0.0572446	0.0423545	0.143812	1.43812e+11	0.297944	0.0697203	0.936021
79	0	0	0	0	0.0037716	-0.00104798	0.0105233	-0.000521948	-0.023504	0.00759065	0.00322164	0.00730385	-0.00688212	0.153429	0.316166	0.174076	0.643671	643671284000	0.251809	0.0498002	0.791082
80	0.000767943	0.0265609	0.0363705	0.0450431	0.00581644	0.0303569	-0.0105538	0.00705597	-0.00193263	0.00101914	0.00201492	-0.006827	0.0139679	0.467271	0.100077	0.228098	0.795447	795447260000	1.34193	1.41433	4.21581
81	0.00565255	0.00242336	-0.00695473	0.00928398	0.000133825	-0.000542429	0.000339331	-0.00295555	-0.000474771	-0.000493991	-0.0114852	-0.00614863	0.0025593	0.0101559	0.0392431	0.201931	0.25133	2.5133e+11	1.94724	2.97804	6.11746
82	-0.000482123	-0.000573939	0.00156784	0.00173781	-0.000895327	0.00122711	-0.00012557	-0.00245152	0.00087923	0.000347991	-0.000334692	-0.000737813	-0.00231442	0.02248	0.0367874	0.0338692	0.0931367	9.31367e+10	0.796288	0.498002	2.50162
83	-0.00826925	-0.000596498	0.00344576	0.00897829	0.00224993	0.00394067	0.00367586	0.00125076	-0.00277305	-0.000484193	0.00147023	0.000824865	-0.00248735	0.0986646	0.0450801	0.0478245	0.191569	191569123000	1.01975	0.816723	3.20364
84	-0.0804023	0.0331744	-0.0250214	0.090505	1.61026e-05	0.000762527	0.00710832	-0.0515113	-0.0488038	-0.0284445	-0.0308153	-0.0249148	-0.0152429	0.0788695	1.2876	0.70973	2.0762	2.0762e+12	1.22328	1.17528	3.84306
85	0.0422116	0.00648682	0.0170474	0.0459838	-0.00244186	0.000667913	0.00355068	-0.00573713	0.0053983	0.00390868	0.00473367	0.00140836	0.00457054	0.0666045	0.150441	0.107126	0.324171	324171269000	0.684994	0.368521	2.15198
86	0.00316065	0.00317848	-0.00787463	0.00906103	-0.000136009	0.000926055	0.000919629	0.00308024	-0.000116642	-0.000559964	-0.00240063	-0.00390394	-0.00637307	0.0198169	0.0375685	0.126776	0.184162	184161798000	1.48118	1.72309	4.65329
87	-0.00925434	-0.009661	-0.0194747	0.0236271	0.0219011	-0.0129634	-0.0105109	-0.0262072	0.036491	0.0296489	-0.0120857	0.00962012	-0.0023515	0.453754	0.923471	0.240573	1.6178	1617798250000	3.07786	7.44018	9.6694
88	-0.00373751	0.00145294	0.00290692	0.0049528	-0.00100238	0.000407712	0.000392486	0.00404188	8.05835e-05	0.00146482	0.000421003	0.000514195	-0.000865621	0.0180257	0.0558728	0.0180082	0.0919068	9.19068e+10	0.490865	0.189241	1.5421
89	0.00684301	-0.00465614	-0.00478749	0.00956172	0.00180173	0.00210169	-0.000223259	0.000261735	0.00139417	0.00360364	0.00261364	0.000493466	0.00119711	0.0412667	0.0525954	0.0430421	0.136904	136904313000	1.88772	2.79876	5.93047
90	0.00140895	0.0039864	0.00762698	0.00872052	0.00434765	0.00471745	0.00786032	-2.27466e-05	0.00382733	0.00133565	-0.00185234	-0.00520147	-0.00503459	0.169254	0.0518573	0.120884	0.341995	341995475800	0.914867	0.657362	2.87414
91	0.005191	-0.0089152	-0.000684065	0.010339	0.0040523	0.000412719	0.0112461	-0.00515949	0.00857342	0.00269514	0.00539902	-0.00123405	-0.00237029	0.157112	0.164281	0.0900337	0.411426	4.11426e+11	1.00092	0.786843	3.14449
92	0.0564316	0.0662223	0.0642427	0.108153	-0.0109593	0.00939769	-0.00764677	0.00282534	-0.00705514	0.00965229	-0.00842552	0.0136153	-0.00838137	0.280037	0.195328	0.304222	0.779587	7.79587e+11	1.56851	1.93225	4.92763
93	0.00413332	0.00932944	-0.0171302	0.0199391	0.0205538	0.00977144	0.00769726	0.00678003	0.00456592	0.00294737	-0.0368837	-0.0107395	-0.0139069	0.380225	0.142933	0.6153	1.13846	1.13846e+12	1.22846	1.18525	3.85931
94	-0.00503746	0.0121964	-0.00910372	0.0160314	0.00232877	-0.000296055	-0.00224014	-0.0048923	-0.00327641	0.001718	-0.00264882	0.000897474	-0.00317508	0.0486496	0.0988671	0.0672138	0.21473	214730479000	0.3901	0.119521	1.22554
95	0.0103302	-0.00770786	0.00487555	0.0137802	0.00127163	0.000939326	0.00081001	-0.00194585	-0.00269541	-0.00110799	0.00195361	0.000524909	0.00146721	0.0302097	0.0574925	0.0394573	0.127159	1.27159e+11	0.755426	0.448201	2.37325
96	-0.00358491	-0.000976507	0.0105	0.011138	0.0014698	0.000344668	0.000382239	-0.000314567	0.000699754	0.000256544	0.00452509	0.00186982	-0.00135841	0.0219671	0.0127087	0.0775332	0.112209	1.12209e+11	0.955547	0.717123	3.00195
97	-0.00724463	0.000914922	0.000109541	0.007303	-0.000124302	-0.00123441	-0.00200616	2.81668e-06	-0.000909613	-0.00158033	0.000828569	0.00224467	0.000978995	0.0336487	0.0249276	0.0405224	0.0990987	99098747760	0.872291	0.597602	2.74039
98	0.00578264	0.00550621	0.00550094	0.00969627	0.00173564	0.00224004	0.00917921	-0.00230657	0.00331837	-0.00221111	0.0033666	-0.000730288	-0.000108565	0.131549	0.0783605	0.0420545	0.251964	2.51964e+11	1.05038	0.866524	3.29986
99	-0.0214894	0.00503413	0.00842404	0.0236242	0.000235898	0.00606645	0.000661276	-0.00517678	-0.000466435	-0.000830559	-0.0109628	0.000961549	0.00914023	0.0696362	0.0647377	0.210646	0.34502	3.4502e+11	0.694188	0.378481	2.18086
100	-0.374063	0.327154	0.20738	0.538479	4.43897e-05	-0.0016225	-0.000342306	0.000343413	-0.000630852	0.00026505	7.02428e-05	0.000978948	5.18514e-07	0.020092	0.0123931	0.0104971	0.0429822	42982191038	0.337837	0.0896404	1.06135
101	-0.00170834	0.000162219	-0.000449715	0.00177398	-0.00295053	0.00190694	-5.04986e-05	-0.000899889	0.000951381	0.000442876	-0.00418033	0.0096382	0.000841038	0.0490797	0.0229415	0.146596	0.218617	218616916800	0.464312	0.169321	1.45868
102	0.0225308	0.0198654	0.0100375	0.0316705	0.0111567	-0.00719768	-0.0117156	-0.0013445	-0.00275157	0.00269292	0.00492334	0.0115307	-0.00617654	0.3007	0.0678899	0.226306	0.594896	5.94896e+11	1.39748	1.53385	4.39032
103	0.00319091	0.00236885	0.000805325	0.00405486	-0.000714258	0.000621737	0.00519489	-0.000240979	0.00524279	0.00084112	0.00299497	-0.000560852	0.000604072	0.0653089	0.0632489	0.0415989	0.170157	170156683000	1.59258	1.99201	5.00325
104	-0.00379547	0.00511543	0.00677585	0.00929975	-0.00681077	-0.00251689	-0.000150695	0.00481908	0.000809704	0.00789092	-0.0044175	-0.00289075	0.00266335	0.0947836	0.135197	0.099716	0.329697	3.29697e+11	3.04468	7.28081	9.56518
105	0.00332869	-0.0138086	0.00406588	0.0147746	0.0132895	0.0251261	-0.00534034	-0.00921784	0.0090078	-0.0279255	-0.0261993	0.020357	0.00272465	0.437559	0.461511	0.492809	1.39188	1.39188e+12	4.83702	18.3764	15.196
106	0.00290344	0.00148352	-0.00355835	0.00482624	0.00212389	-5.76751e-05	0.00309702	7.49348e-05	0.0013726	-8.39702e-05	0.00235472	0.00567682	-0.00230482	0.0527858	0.0153151	0.103364	0.171465	171464530800	2.54314	5.07962	7.98952
107	-0.00320737	-0.00509044	-0.00329371	0.00685918	-0.00229151	-0.0029503	0.00695626	-0.00682497	0.00250091	0.000149445	0.000501549	0.00129163	0.019124	0.121981	0.0947532	0.209172	0.425906	4.25906e+11	2.27745	4.07364	7.15483
108	0.0143571	-0.00257574	0.000911978	0.0146148	-0.00710819	0.00319914	-0.000558696	0.000502727	-0.00630165	0.0135287	-0.00218667	-0.00974749	0.00553452	0.10866	0.203331	0.174687	0.486678	486678014000	1.70041	2.27089	5.342
109	-0.00803341	0.0102851	-0.0414273	0.0434343	-0.00543641	0.00199402	0.000155876	0.00641868	-0.00147417	-0.00374233	-0.00293749	-0.000565619	-0.000255175	0.0758631	0.116352	0.0375829	0.229798	229797684000	0.318516	0.0796803	1.00065
110	-0.0103124	0.360937	-0.0363148	0.362906	0.00274094	0.00311725	0.0031375	0.00278613	-0.0035582	-0.00748549	-1.92673e-05	0.001216	0.00473139	0.0899568	0.138298	0.0596665	0.287922	2.87922e+11	0.337837	0.0896404	1.06135
111	0.00414685	-0.00395672	0.00586832	0.008203	-0.000152597	0.000942975	0.000175478	-0.00154709	0.000893597	-0.000869795	0.00122509	-0.00189371	0.00173007	0.0127105	0.0331048	0.0484888	0.0943042	94304162000	1.01351	0.806763	3.18405
112	0.00326719	0.0118155	-0.00397222	0.0128864	0.00207432	0.00467231	-0.0149396	0.00162041	-0.00371021	0.000365397	-0.000604294	-0.0154421	-0.0182447	0.216862	0.0569601	0.342911	0.616733	6.16733e+11	4.03057	12.7589	12.6624
113	3.94485e-05	-0.00134787	0.000851707	0.0015949	0.00159747	0.00126566	-0.000516135	0.00183406	-0.000135445	0.000130352	-0.00646741	-0.0024398	0.00300535	0.0337926	0.0209986	0.119126	0.173917	173916868000	2.42052	4.60153	7.6043
114	0.00940194	-0.00182609	0.00320762	0.0101005	-0.00216645	0.00179192	0.00323049	0.00158795	-0.0014204	-0.00114904	-0.000725829	0.00181712	0.00185284	0.0718886	0.0415739	0.0439579	0.15742	157420345000	1.24893	1.22509	3.92364
115	0.00344893	-0.0114374	-0.00788737	0.014315	-0.000173456	0.00204929	0.00222855	-0.00151634	0.000880549	-0.00254788	-0.000959125	-0.00242339	-0.00298765	0.044513	0.0494476	0.0637016	0.157662	1.57662e+11	0.666223	0.348601	2.09301
116	0	0	0	0	1.43717e-05	-0.003079	-0.000630242	0.00378423	-0.000350984	-0.000517469	-0.00453771	-0.00262731	-0.000629937	0.0372361	0.0465269	0.0779496	0.161713	161712566100	0.477773	0.179281	1.50097
117	0.0313998	-0.0104303	0.00647603	0.0337147	0.000409891	0.0020754	-0.00333341	0.000951679	-0.00308391	-0.000793544	-0.00353911	-0.00100997	-0.00109587	0.058187	0.0482913	0.0564495	0.162928	162927822000	0.595888	0.278881	1.87204
118	0.00153878	-0.00131509	-0.00379955	0.00430511	-0.000770743	0.00197767	-2.41122e-05	0.000356783	-0.000658016	0.000296416	-0.00293789	0.000862301	0.00198564	0.0277253	0.0131122	0.0578584	0.0986958	98695797600	1.23873	1.20517	3.89161
119	-0.00777268	0.00761599	0.0174203	0.0205398	0.00550455	0.000236292	-0.00815561	-0.000128815	-0.0051084	0.00308212	-0.000416443	0.000799183	-0.00265871	0.138965	0.0831934	0.0387433	0.260901	2.60901e+11	0.656637	0.338641	2.06289
120	-0.0254097	0.00348316	0.0720262	0.0764563	0.00598307	0.000488739	0.00127092	0.00618885	-0.000259228	0.00263063	0.00120687	0.00316994	0.00179592	0.0774273	0.0907871	0.0617273	0.229942	2.29942e+11	0.373493	0.10956	1.17336
121	-0.000642791	0.000885046	0.000333286	0.00114349	0.000878011	0.00221452	-0.000222036	0.00184597	-0.00146828	0.000431955	0.000772316	-0.00213286	0.00266439	0.0331457	0.037462	0.0556957	0.126303	126303362000	2.44655	4.70113	7.68607
122	-0.000124111	0.0021381	0.0016619	0.00271086	0.000752764	-0.000718516	-0.000893151	-0.00281637	-0.00104619	-0.00295281	-0.000904124	0.000404897	0.00150421	0.0236443	0.0681536	0.0281323	0.11993	119930278000	1.56851	1.93225	4.92763
123	-0.0100623	0.00984823	0.00374297	0.0145687	-0.000619078	0.00574796	-0.00320027	-0.00387798	-0.00139692	-0.00204114	0.0019607	-0.00153635	0.00284282	0.0956731	0.0731603	0.0633986	0.232232	232232098000	1.27903	1.28485	4.01819
124	-3.12778e-05	0.0018923	0.000431773	0.00194119	-0.00156037	-0.000868697	0.000914488	0.0028765	-0.000236914	0.00772676	0.00148319	-0.0021428	-0.000491559	0.0334355	0.108402	0.0411754	0.183013	183012679000	11.1557	97.7262	35.0467
125	0.000639816	-0.00879317	-0.00492979	0.0101011	0.00409807	-0.00143805	0.00445426	0.00533281	-0.00242356	0.000361049	-0.0110717	0.000591078	-0.00395455	0.0999037	0.0811742	0.156173	0.337251	337251195000	1.08014	0.916324	3.39336
126	-0.0182701	0.0230625	-0.00767405	0.0304067	-0.0211926	-0.00986539	0.00218154	-0.0215522	-0.0366982	0.0413102	0.00213555	0.0351435	-0.00971572	0.332395	0.995606	0.469948	1.79795	1.79795e+12	2.34059	4.30272	7.35319
127	-0.0262923	-0.0490958	0.0277475	0.0622223	-0.00352238	0.00115974	0.0075757	0.00954559	-0.00210336	-0.000534579	0.00261984	-0.00868905	-0.0107923	0.122578	0.121835	0.221012	0.465425	4.65425e+11	0.251809	0.0498002	0.791082
128	-0.000239271	0.00120506	0.000726222	0.00142717	0.000358251	-7.07755e-05	-0.000315992	-0.000762244	0.000921394	0.00333915	-0.000491264	0.000161501	0.00027846	0.00745018	0.0502279	0.00931225	0.0669903	66990332300	2.0457	3.2868	6.42676
129	0.000467867	-0.0080971	0.0242194	0.0255413	0.00219932	-0.000453184	0.00359697	-0.00177888	0.00302051	-0.00954074	-0.000500785	0.00133104	-0.00413992	0.0624947	0.143401	0.0597174	0.265613	265613473000	0.72107	0.408361	2.26531
130	0	0	0	0	0.00427437	-0.00143341	0.00100257	0.00231468	-0.00482145	0.000756267	-0.00778492	0.00854721	-0.00756489	0.0671034	0.078924	0.23897	0.384998	384997534000	0.490865	0.189241	1.5421
131	-3.75516e-05	0.0464581	0.0158078	0.0490738	-0.00576398	0.00819091	0.0131822	0.0170766	-0.0189084	0.00326018	0.000892052	-0.0164036	-0.00457522	0.271371	0.392453	0.218709	0.882533	8.82533e+11	2.0426	3.27684	6.41704
132	-0.00361743	0.00159386	-0.00157457	0.00425505	0.000249984	0.00222524	0.000683921	-0.00126354	-0.000471711	-0.000421354	0.000295343	0.000555951	0.000282902	0.0315914	0.0215661	0.011342	0.0644995	6.44995e+10	1.63191	2.09161	5.1268
133	0.00524441	0.00101011	-0.0019807	0.00569626	0.0161335	0.0115126	0.0126726	-0.00328346	-0.0105467	-0.0065833	-0.0164685	-0.00181779	-0.0337763	0.403186	0.204135	0.520626	1.12795	1.12795e+12	1.83665	2.64937	5.77
134	0.138269	-0.0788031	0.0829824	0.179484	0.000649957	-0.00117823	-0.00192888	0.00343804	-0.00307995	-0.0063237	0.00336268	0.00426358	0.0138145	0.0375706	0.128417	0.214407	0.380395	380394602000	0.225224	0.0398402	0.707565
135	-0.00197164	-0.00390397	0.0018653	0.00475475	-0.00132496	-0.000325942	-0.00122646	0.0027924	-0.00133246	0.00139921	-0.00163408	0.0010781	-0.000144619	0.0287736	0.0552407	0.028568	0.112582	112582262000	0.914867	0.657362	2.87414
136	-0.00623948	0.00394017	0.000684909	0.00741115	-0.00137563	0.000515098	0.00199755	-0.000113676	0.00150778	0.000389039	0.000301843	0.00432327	-0.000451439	0.0388828	0.0201049	0.0507655	0.109753	109753231000	2.31883	4.22304	7.28485
137	-0.00237034	-0.000241535	-0.00206949	0.00315589	0.00555819	0.0107774	0.00913649	0.00146173	0.00951011	0.00559777	-0.000864387	-0.00414783	-0.00577291	0.254721	0.165696	0.107851	0.528268	528268026000	5.69233	25.4482	17.883
138	-0.0128578	0.0205398	-0.0137977	0.0278851	0.000660261	-4.25724e-05	0.000805444	-0.00378714	-0.011641	-0.00675519	0.00148573	0.00167196	0.000326761	0.0150828	0.221833	0.0348446	0.271761	271760703200	0.421356	0.139441	1.32373
139	0.000622611	0.00662885	-0.00114857	0.00675637	-0.000213671	0.000539226	5.34731e-05	0.00062583	0.00035051	-0.000471809	-0.00153721	3.10146e-05	-0.00231157	0.00806371	0.0144815	0.0387979	0.0613431	61343104600	3.19709	8.02783	10.044
140	-0.00465757	0.0084504	-0.0208666	0.0229895	0.0109981	0.00478524	0.0117944	0.0089181	-0.000570909	0.0052451	-0.0167438	-0.000994435	-0.018573	0.275777	0.147341	0.363112	0.786231	7.86231e+11	1.62021	2.06173	5.09005
141	-0.0104124	0.00160644	0.00679676	0.0125377	0.00310509	0.00238503	-0.000684638	0.00919847	-0.00123483	-0.00471536	-0.00381719	0.00362897	0.00380284	0.0617476	0.151487	0.11249	0.325724	325724195000	1.3607	1.45417	4.27478
142	0	0	0	0	-0.00107149	0.000649128	0.00140702	0.00148354	0.00152242	-0.001195	0.000406907	0.000410925	-0.00102929	0.0312764	0.0420097	0.0184712	0.0917573	9.17573e+10	0.318516	0.0796803	1.00065
143	0.0015903	0.00355595	-0.0041173	0.00566798	0.00279866	0.000270913	0.00149877	9.86956e-05	-0.00108175	0.00118996	-0.000776626	0.00112552	-0.00176723	0.0456834	0.0237041	0.0366938	0.106081	106081212600	0.656637	0.338641	2.06289
144	-0.00193045	0.00371791	-0.00291169	0.00510171	0.00090165	-0.000382792	0.0016863	-0.000513964	-0.000614638	0.000873339	0.00379339	0.00300076	-5.44354e-05	0.0297074	0.0200194	0.0684858	0.118213	118212644900	1.65506	2.15137	5.19953
145	-0.00174694	0.00171985	0.00454231	0.00516162	-0.000725155	-0.00353135	-0.000837993	-0.00220994	0.00182559	-0.000161165	-0.00044981	-0.0002864	0.00253413	0.0509449	0.041967	0.0327034	0.125615	1.25615e+11	1.28398	1.29481	4.03375
146	0.00238588	-0.00117292	-0.00244868	0.00361445	-0.00269291	0.000485387	-0.00400412	0.00707323	-0.00370867	3.40919e-05	-0.000653418	0.000178982	0.000934546	0.0718242	0.10816	0.0176695	0.197654	197653635900	0.942181	0.697203	2.95996
147	-0.0028128	-0.203914	0	0.203933	-0.0223218	-0.00750824	-0.00479987	0.0124533	0.00875617	0.0205163	0.00986404	0.00126013	-0.00591677	0.346299	0.417258	0.170409	0.933967	9.33967e+11	0.251809	0.0498002	0.791082
148	0	0	0	0	0.000657442	-0.00280145	-0.00820856	0.00116652	-0.00507275	-0.0148857	-0.000337484	0.00150342	0.00443852	0.116675	0.21125	0.0627942	0.390718	390718247000	0.337837	0.0896404	1.06135
149	-0.000664932	-0.000731646	0.000307916	0.0010355	-0.00357685	-0.00275546	0.00101164	-0.00108879	-8.77624e-06	-0.00191624	-0.000649373	-0.000611475	-0.000744447	0.0734395	0.030138	0.020053	0.123631	123630525360	2.66015	5.5577	8.35711
150	-0.00202365	0.000464135	0.00100148	0.00230511	0.00540801	-0.000371677	0.000542169	0.00336812	0.0174624	-0.0147401	-0.00205243	-0.00699619	-0.0013794	0.0632185	0.355706	0.10428	0.523205	5.23205e+11	11.3755	101.649	35.7371
151	-0.00037615	0.00288743	-0.00340504	0.00448029	0.00299142	-0.00148583	0.00356054	-0.00106656	0.00465684	-0.0004606	0.00215664	0.00174827	-0.00244558	0.0803779	0.06184	0.0635049	0.205723	205722794000	1.56851	1.93225	4.92763
152	-0.00116918	0.00291042	-0.000203268	0.00314306	0.0291896	0.0170431	-0.0195668	0.0168383	0.0309309	0.0286587	0.00492605	-0.0246257	-0.0143374	0.657995	0.764278	0.438892	1.86116	1861164940000	1.23873	1.20517	3.89161
153	0.0020103	-0.000935207	-0.00596904	0.00636752	0.000938137	-0.00231379	-0.00155506	-0.0027148	-0.00186572	0.00153044	-0.00158213	-0.000843197	0.000693149	0.0480698	0.0611096	0.0311847	0.140364	140364112000	0.827527	0.537842	2.59976
154	-0.000166082	0.00589674	0.0109488	0.0124368	0.000981376	0.00424473	3.11202e-05	0.00142358	0.00449043	0.000282589	-0.000462995	-0.00313768	0.000128476	0.0525722	0.061966	0.0372915	0.15183	151829679900	1.18109	1.0956	3.7105
155	0.0177336	-0.00974353	0.0234058	0.0309394	0.00355952	-0.00258926	0.002397	0.00138604	-0.000195347	0.00406872	-0.00149871	0.00185035	-0.000339574	0.0854577	0.0565011	0.0368863	0.178845	178845213000	0.921771	0.667323	2.89584
156	0.00276986	-0.0011939	-0.000174337	0.00302124	-0.00431687	-0.00346555	0.0179061	-0.00679448	0.000997642	0.00875263	0.00287327	-0.00285086	-0.010757	0.256885	0.165448	0.164811	0.587144	587143664000	7.51798	44.3924	23.6185
157	0.000109314	0.000318874	0.00238018	0.00240393	-0.00438424	0.00455908	0.000366499	-0.0106541	0.00291432	-0.000636724	0.0114168	0.00275176	0.00248286	0.0930982	0.142052	0.166514	0.401664	4.01664e+11	7.5838	45.1693	23.8253
158	-0.0343598	0.0154689	-0.0232666	0.0442856	-0.00159955	-0.00549412	0.00128746	0.00275036	-0.00284831	0.0255161	0.0137331	-0.0206291	-0.00117339	0.0838112	0.311147	0.355357	0.750315	7.50315e+11	3.29859	8.54576	10.3628
159	0.000875571	0.000383377	-0.0117944	0.0118331	5.28042e-05	0.00890157	-0.00377455	0.00252023	0.0105728	-0.0105204	-0.00480074	0.00157452	0.00330908	0.127289	0.236134	0.0968435	0.460267	4.60267e+11	1.11481	0.976084	3.50227
160	-0.0287694	-0.00902293	-0.00196114	0.0302148	-0.00447051	6.6936e-05	-0.0137461	0.014893	-0.0181312	0.0183766	0.00821405	0.00728823	-0.00297306	0.182836	0.514007	0.184754	0.881597	881596780000	0.755426	0.448201	2.37325
161	-0.000369186	-0.0015753	0.00204475	0.00260746	0.000457314	-0.000326536	-0.000518637	-0.00236242	0.00120483	-6.94407e-05	-0.000863397	0.000408935	0.000350816	0.0130249	0.0363669	0.0162315	0.0656233	6.56233e+10	1.83665	2.64937	5.77
162	-0.00209866	0.00127982	0.00327222	0.00409264	0.000652878	0.0030052	0.000517641	0.0030603	-0.00104812	0.00159879	0.000605086	-0.000183215	-0.00126576	0.0417572	0.0570721	0.0205406	0.11937	1.1937e+11	1.36535	1.46413	4.28939
163	0.00309005	-0.0172412	0.0213392	0.0276074	-0.0036258	0.00161736	-0.00153956	-0.00473661	-0.000645566	-0.0117682	-0.00122764	0.0019748	0.00548754	0.0678271	0.171504	0.0868997	0.326231	3.26231e+11	1.42444	1.59361	4.47503
164	0	0	0	0	0.00161231	-0.00314905	-0.000611294	0.00524274	-0.00635616	-0.00135414	0.000928988	-0.00416895	0.00291222	0.0537265	0.129531	0.0801016	0.263359	263358620000	0.356111	0.0996004	1.11876
165	0.011977	-0.00450282	-0.00856841	0.0153994	0.00947777	0.0039939	-0.0276367	-0.00433299	-0.00739385	0.00548231	0.000417725	0.00227398	-0.0106469	0.411084	0.172092	0.133386	0.716561	7.16561e+11	2.22675	3.89436	6.99556
166	-0.000337986	0.00275919	-1.27457e-05	0.00277984	-0.00263177	-0.00225497	0.00522119	4.04763e-05	-0.00215531	0.00224769	-0.000492206	-0.00516367	0.00539064	0.101079	0.0444348	0.110465	0.255979	255979061400	0.893832	0.627482	2.80806
167	4.44128e-05	0.000172028	-0.00109359	0.00110793	0.000737099	0.00268983	-0.000775713	0.000438187	-0.000564847	0.00145463	0.000700828	0.00348285	0.000315417	0.0420264	0.0245767	0.044991	0.111594	111594051000	2.42835	4.63141	7.62889
168	-0.000488196	0.0243246	-0.0375954	0.044781	-0.000397018	0.0034773	0.00077336	0.00191302	-0.000341176	0.00150347	0.000757403	0.00131445	-9.46568e-05	0.0464768	0.0375766	0.0216651	0.105718	105718497700	1.10337	0.956164	3.46635
169	-0.0385064	-0.00211382	-0.0603305	0.071603	-0.00288671	-0.000699195	0.000768583	0.00398695	-0.000438993	-0.00542246	-0.00695856	-0.00275177	-0.00171944	0.0435449	0.098484	0.114298	0.256327	256326681000	0.450449	0.159361	1.41513
170	0.00480519	0.0108416	0.00129842	0.0119296	-0.00096479	-0.00452735	0.00310128	-0.00327273	-0.0143171	-0.00302088	-0.00389651	-0.00183667	-0.000480693	0.0859342	0.206107	0.0621387	0.35418	3.5418e+11	0.712222	0.398401	2.23752
171	0.00343523	-0.00320828	-0.00531745	0.00709713	0.00215264	-0.00125806	-0.000308621	-0.00146516	-0.00213145	0.000211602	0.000148849	0.000183684	-0.000675388	0.0371932	0.0380821	0.0100792	0.0853545	8.53545e+10	1.25904	1.24501	3.95541
172	0.00221006	-0.00053185	-0.0109212	0.0111553	-0.00531769	0.000827132	-4.72383e-05	0.000592158	-0.00220823	-0.00251268	0.00317985	-0.000101835	0.00568318	0.0619206	0.0531307	0.0896487	0.2047	204699915700	0.746985	0.438242	2.34673
173	0	0	0	0	0.000208437	-0.000618832	0.000419907	0.00133677	0.000531157	-9.02833e-05	0.00102342	0.00101002	-0.00010824	0.0124718	0.0195821	0.0214168	0.0534707	5.34707e+10	0.297944	0.0697203	0.936021
174	0.0510859	-0.0207231	0.0553018	0.0780866	0.00139039	-0.0067319	-0.0120646	0.00462131	-0.00737944	0.00884956	-0.00230618	0.0032978	-0.00625555	0.201869	0.208503	0.118595	0.528967	5.28967e+11	0.703263	0.388441	2.20937
175	-2.8088e-05	-0.0183664	-0.00656534	0.0195046	-0.0197137	0.0288512	-0.0150811	-0.0112716	0.0204368	-0.0122011	0.0232902	-0.0235423	0.0212644	0.636461	0.439094	0.680969	1.75652	1756524200000	3.32542	8.6852	10.4471
176	0.00447823	-0.0593763	-0.0642272	0.0875827	0.00897925	-0.0115912	0.00495134	0.00680237	-0.0242054	-0.0129658	-0.00942187	0.0213838	0.00644673	0.255218	0.439736	0.372524	1.06748	1067478830000	1.33245	1.39441	4.18601
177	-0.00229763	-0.00110995	0.0023732	0.0034847	-0.0160349	-0.0139497	0.0191856	0.000600539	0.00294545	-0.0109633	0.00179792	0.0106932	-0.00287539	0.491701	0.145093	0.153666	0.79046	790459946000	3.30631	8.5856	10.3871
178	0	0	0	0	-0.0172122	-0.0164155	-0.00720907	0.0194284	-0.00280973	-0.00773331	-0.0302089	0.0105519	-0.00416383	0.408367	0.299715	0.449247	1.15733	1157329040000	0.275842	0.0597602	0.866587
179	-0.00672397	0.00473324	0.00452983	0.00938801	-0.00701685	0.00305209	0.0211063	-0.00692753	-0.00610088	0.00126554	-0.000478211	0.00529904	0.000842361	0.311753	0.142939	0.0661961	0.520888	520888319000	2.82205	6.25492	8.86575
180	0.000396292	-0.000147638	0.000112426	0.000437589	-0.00184269	-0.000320723	0.00495085	0.00836069	-0.00348518	0.00164346	0.000475982	-0.00212197	-0.000987534	0.0711426	0.134893	0.0358549	0.241891	241890795000	5.016	19.7609	15.7583
181	0	0	0	0	-0.0014329	0.009537	0.00033336	0.00436917	-0.0021771	-0.00629286	-0.00508675	0.00882837	0.0132044	0.113033	0.128391	0.271195	0.512619	5.12619e+11	0.337837	0.0896404	1.06135
182	-0.0127351	0.0136102	-0.0158171	0.0244459	0.00537169	0.000557506	-0.0022381	-0.000449989	0.0046208	0.00151453	0.000125689	0.0051543	-0.00411229	0.081673	0.0658532	0.0939227	0.241449	241448943000	0.656637	0.338641	2.06289
183	-0.00668248	0.00568239	0.000440069	0.00878287	-0.0203807	-0.00285791	0.00808586	-0.0106436	-0.00553351	0.00680962	-0.0029445	0.0164375	0.000931015	0.313244	0.229868	0.20313	0.746242	746242035000	2.03015	3.237	6.37791
184	-0.00231143	0.0021181	0.00221614	0.00383932	0.00194408	2.25796e-05	0.0016621	0.00124994	0.00252264	-0.00542014	0.00124152	-0.00301917	0.0017809	0.0362876	0.0919272	0.0604159	0.188631	188630715800	1.09182	0.936244	3.43005
185	0.0435333	-0.00433392	-0.0478978	0.0648701	-0.00298084	0.00159947	-0.000876534	-0.00578944	0.00304199	0.0003211	0.000802151	-0.000387994	0.000173227	0.0545685	0.0915253	0.0136337	0.159728	159727515000	0.275842	0.0597602	0.866587
186	-0.00332339	-0.000517717	-0.00056671	0.00341088	-0.00194154	0.00350425	-0.0172598	-0.00625727	0.0102036	-0.00922648	-0.00580291	0.00345565	0.00170818	0.227056	0.256873	0.109667	0.593597	5.93597e+11	2.48512	4.85053	7.80725
187	0.0195148	0.013124	-0.0334696	0.0409058	-0.00264182	0.00391808	0.00535841	-0.00802745	0.000681211	-0.00240006	-0.00193341	0.00459079	-0.00321361	0.119183	0.111087	0.0973781	0.327648	327648370000	0.3901	0.119521	1.22554
188	-0.0140676	-0.00335681	0.00324114	0.0148213	0.019409	-0.00637633	-0.00272341	0.0156871	-0.00316805	-0.0183026	-0.0173477	0.00272386	-0.0105954	0.285088	0.371577	0.30667	0.963335	9.63335e+11	2.96667	6.91229	9.32008
189	0.00533433	-0.00145902	0.00932324	0.0108401	0.000702147	-0.000502546	0.000279874	0.00169872	-0.00158626	0.000490623	-0.000487866	0.000381711	-0.000323357	0.0148457	0.037756	0.0119293	0.064531	6.4531e+10	1.41999	1.58365	4.46103
190	0.00290544	-0.00545939	0.00132267	0.00632424	-0.00156749	-0.00143247	0.00433077	-0.00139722	0.00235954	0.00314876	0.00413954	0.0035851	0.00135431	0.0733072	0.0690552	0.0907895	0.233152	233151980000	0.86499	0.587642	2.71745
191	-0.00316012	0.00469369	0.00436468	0.00714616	0.00586288	-0.0101181	0.010999	-2.4484e-05	0.0039966	-0.0068912	0.00186176	-0.000487181	0.000944223	0.2698	0.109123	0.0329316	0.411854	4.11854e+11	2.19521	3.7848	6.89646
192	0.000559914	-0.00417802	-0.00842525	0.00942094	0.00309563	-0.000550434	-0.00228719	0.00113309	-0.00309355	0.000864687	0.000203332	-0.00129324	0.00333579	0.0593325	0.0509133	0.0483236	0.158569	158569390000	0.464312	0.169321	1.45868
193	-0.000454164	-0.000836873	-0.0113982	0.0114379	-0.00115965	5.30631e-05	8.015e-05	2.45023e-05	-0.00215329	-0.00110042	-0.000405968	0.00135297	0.00161262	0.0129287	0.0327821	0.0337155	0.0794263	79426301600	0.477773	0.179281	1.50097
194	0.000731989	4.95342e-05	7.44866e-05	0.000737434	-0.000696219	-0.00374028	-0.00100125	-0.00106098	0.00255659	0.00506088	6.01916e-05	0.00357593	-0.00366206	0.0543775	0.0867844	0.0729818	0.214144	214143770400	8.4961	56.6932	26.6913
195	0.000310828	-0.00252762	0.000409151	0.00257931	0.0177901	-0.00657115	0.00302629	0.034762	-0.0171914	-0.00110386	-0.029536	0.0137976	0.000115735	0.273875	0.530573	0.434493	1.23894	1238940731000	2.27185	4.05372	7.13726
196	0.00180219	0.000220362	0.00218523	0.00284107	0.0125773	0.0161113	0.0030113	-0.0107834	-0.00668282	0.00364893	0.0072086	0.000683245	-0.00727671	0.316999	0.211152	0.151685	0.679836	679835718000	4.59092	16.5537	14.4228
197	0.341519	0.00110055	-0.0146778	0.341836	0.0153515	0.0261992	-0.00231192	0.00298884	-0.00539405	0.000862568	-0.0092756	-0.0235932	0.0101053	0.438626	0.0924546	0.429741	0.960821	9.60821e+11	0.356111	0.0996004	1.11876
198	0.000998155	0.00198609	-0.00137506	0.00261374	-0.000191101	-0.00145407	0.00163571	-0.000664185	0.000139688	0.00135946	0.000751812	0.00130064	0.000963363	0.0328088	0.0216333	0.0301582	0.0846003	84600307000	1.42889	1.60357	4.489
199	0.00243196	-0.00197243	0.00339029	0.00461508	0.00290127	-0.00835224	0.000665545	-0.00437512	0.00156053	0.0011431	-0.0167712	0.00381246	0.00546069	0.119191	0.0707874	0.260443	0.450421	4.50421e+11	7.47119	43.8446	23.4715
200	0.0112796	-0.0241892	0.00785027	0.0278204	0.000126612	3.88855e-05	-0.00047086	0.00056732	0.000566404	0.000184709	-0.000421239	-0.00158401	0.000308362	0.00636357	0.0131843	0.0231361	0.042684	42683988400	0.450449	0.159361	1.41513
201	0.00769282	0.0091515	-0.0103717	0.0158272	-0.00536417	-0.00258645	-0.00624577	0.00301564	0.00127169	-0.0026023	-0.00272176	-0.000926227	-0.00490009	0.141964	0.0688963	0.0854808	0.296341	296340992000	1.45962	1.67329	4.58555
202	-0.014188	0.00146956	-0.0080333	0.0163705	0.00534875	-0.010649	0.00251502	0.00251847	-0.00273163	0.000992867	0.00123349	0.009464	0.00305932	0.185128	0.0624296	0.137568	0.385126	385125607000	1.03823	0.846604	3.26171
203	0	0	0	0	0.00152056	0.00625815	-0.00494871	0.00368803	-0.000447039	-0.00196074	0.00321558	-0.0103416	0.0130647	0.127274	0.0609582	0.266219	0.454451	454451053000	0.225224	0.0398402	0.707565
204	0	0	0	0	-0.00018121	-0.00143501	-0.000376854	0.000363021	0.00130487	-0.00124607	0.00196723	-0.000212196	0.0012002	0.0199308	0.0291396	0.0337963	0.0828667	82866740000	0.251809	0.0498002	0.791082
205	-0.00821546	0.0128914	0.00308639	0.0155951	0.0180971	0.00510842	4.44406e-05	0.0015332	0.000740109	0.00368494	-0.00248681	-0.0126758	-0.000409818	0.232499	0.0595826	0.155724	0.447806	4.47806e+11	4.43505	15.4482	13.9332
206	-0.000726955	0.0111764	0.0150496	0.0187599	0.000821654	-0.00423146	-0.00099647	-0.00386881	-0.00725173	-0.00757048	0.000900385	-0.00604934	0.00827246	0.0604958	0.18691	0.152222	0.399628	3.99628e+11	1.27903	1.28485	4.01819
207	-0.0182864	0.0261083	0.0155374	0.0354605	0.00429652	-0.0047791	0.00176807	0.00183733	-0.00227354	0.00166242	-0.0026031	0.00402096	-0.00128929	0.108437	0.0577329	0.0791335	0.245303	2.45303e+11	0.738447	0.428281	2.31991
208	-0.000112369	0.0124649	0.0117834	0.0171533	-0.00102445	-0.00180208	-3.37833e-06	0.000157663	-0.00248427	-0.00203813	-0.00212818	-0.00217907	0.00307942	0.0282991	0.0468006	0.0738668	0.148967	1.48967e+11	1.08014	0.916324	3.39336
209	-0.0030075	-0.0326458	-0.00173937	0.0328301	-0.000667919	-0.00725042	-0.0135957	-0.00513835	0.0115323	0.0159827	-0.000831777	0.0123271	0.0236304	0.215141	0.326533	0.367893	0.909567	9.09567e+11	2.01131	3.17724	6.31874
210	0.000750606	0.0106859	0.00199205	0.0108958	0.00113664	-0.000664925	0.000689772	-0.000393289	0.000946261	-0.00107997	5.71855e-05	-0.000578381	-0.000280079	0.0249134	0.0241952	0.00915646	0.058265	5.8265e+10	0.675673	0.358561	2.12269
211	-0.00286997	0.00276856	-0.00124973	0.00417893	-0.00229781	0.00200557	0.000675827	0.00142839	0.00290837	-0.00210902	-0.00010751	-0.00206693	-0.00299946	0.0497921	0.0644579	0.051739	0.165989	165988933000	1.80882	2.56969	5.68257
212	-0.07229	0.16404	-0.162164	0.241727	-0.00107765	0.00206445	0.00703822	0.000422165	0.00403805	0.00601506	3.6201e-05	-0.00883751	-0.016106	0.101803	0.104753	0.249797	0.456353	456353030700	0.225224	0.0398402	0.707565
213	0.00374083	-0.0138612	-0.119683	0.120541	-0.00369988	0.080378	0.0896841	-0.00337932	-0.0346704	-0.0202525	0.0114383	-0.0127041	-0.0165579	1.73762	0.583022	0.407003	2.72764	2727644300000	1.21809	1.16532	3.82674
214	-0.00624245	-0.00561175	0.00253093	0.00876729	-0.006805	-0.00130642	-0.00782871	-0.00238032	0.00447959	-0.000497411	-0.00427374	0.00244498	0.00646659	0.159401	0.0735732	0.131853	0.364828	3.64828e+11	0.528198	0.219121	1.65939
215	-0.00551987	-0.0454702	0.282869	0.286553	-0.00937273	0.0129903	-0.0114317	-0.000368208	0.00442997	-0.00577198	0.0292132	-0.0297652	0.0265262	0.337947	0.105702	0.855046	1.29869	1298694823000	0.337837	0.0896404	1.06135
216	0	0	0	0	-0.00162006	0.00368652	-0.0014285	0.000573679	-0.000682726	0.000162886	0.00045854	-3.53877e-05	-0.000150958	0.0673508	0.0141929	0.00644886	0.0879926	87992550200	0.251809	0.0498002	0.791082
217	0.00222141	-0.000525748	0.00587823	0.00630592	0.00519239	-0.00136849	0.00382882	-0.000369138	0.00390522	0.00111653	0.00132746	0.00491675	-0.00348262	0.103897	0.0539088	0.0972683	0.255074	255074085000	0.746985	0.438242	2.34673
218	0.00201316	0.0053686	0.00293278	0.00644017	0.000918571	0.00300715	0.00107657	0.0116818	-0.00368948	-0.00928349	0.00828702	0.000422651	-0.0104001	0.050023	0.246548	0.191098	0.487669	487668600000	1.74458	2.39041	5.48076
219	0.00617235	0.0074743	-0.00493957	0.0108794	0.00853107	0.00521995	-0.00218203	0.0188361	0.00276254	0.0108126	0.00372591	-0.00482363	0.00447668	0.159331	0.324113	0.130262	0.613706	613705680000	2.64819	5.5079	8.31956
220	-0.00610664	0.0262624	-0.0368106	0.0456292	0.0484432	-0.0271211	0.0292477	0.00361832	-0.00696414	0.015063	-0.056531	0.0101955	-0.0183555	1.04812	0.256455	0.850821	2.1554	2.1554e+12	1.89443	2.81868	5.95155
221	-0.0341526	-0.016802	-0.0208184	0.0433833	0.00135108	-0.00559012	-0.00634321	0.00647418	0.000262813	-0.000794256	-0.00130845	-0.00267377	0.00883258	0.132844	0.0753125	0.128148	0.336305	336304640000	0.251809	0.0498002	0.791082
222	0	0	0	0	0.0035361	-0.00109891	-0.00468551	-0.0124115	0.00667781	-0.00116261	-0.00197402	0.00339034	0.000916724	0.0932052	0.202519	0.0628108	0.358535	3.58535e+11	0.297944	0.0697203	0.936021
223	0.00161959	-0.000164977	0.00534356	0.00558604	8.85255e-05	-0.00150515	-0.000636931	0.00253635	-0.00159271	0.00321908	0.00138459	-0.000807654	0.00284118	0.0223061	0.0734815	0.0503343	0.146122	146121826400	1.22328	1.17528	3.84306
224	0	-0.0970267	-0.0217514	0.099435	-0.00367985	-0.0190984	0.00424174	0.0047237	-0.00150334	0.00982523	0.000869327	0.0150978	-0.0204857	0.2702	0.160523	0.364528	0.79525	795250403000	0.225224	0.0398402	0.707565
225	0	0	0	0	0.00085412	0.000670641	-0.00010182	-0.00101995	-0.00153011	-0.00132012	0.000870046	0.000121203	-0.000808617	0.0162658	0.0387019	0.0179987	0.0729664	72966351000	0.275842	0.0597602	0.866587
226	0.00481165	0.00200475	-0.00355408	0.00630892	-0.00126699	0.000683096	0.00429794	0.00187266	-0.00137315	0.000292664	0.00311271	-0.00342929	-0.00510909	0.0624802	0.0353848	0.116511	0.214376	214375838000	0.755426	0.448201	2.37325
227	0.00144299	0.00215989	-0.00224503	0.0034333	-0.00438988	-0.000394881	-0.0027049	1.24529e-05	-0.00262959	0.00335014	0.000761137	0.00142236	0.00299024	0.0748966	0.0599218	0.0517373	0.186556	186555759000	1.27903	1.28485	4.01819
228	0.00288373	0.0252052	-0.00985422	0.0272162	-0.00191746	0.00300436	-0.00557705	0.00849421	0.00557981	0.00885539	-0.00431046	0.00351199	0.000505513	0.104989	0.229294	0.0832797	0.417563	4.17563e+11	1.15942	1.05577	3.64242
229	0.000686301	0.000285583	0.000575948	0.000940363	0.00279355	0.00219058	0.000724411	-0.000441467	-0.00217767	-0.000359222	-0.00234987	-0.00205888	-0.00121254	0.0570854	0.0297836	0.056213	0.143082	143082034000	1.43774	1.62349	4.5168
230	-0.00102822	0.00148608	-0.0123467	0.0124782	-0.00515377	0.00703842	-0.0338672	-0.0162829	0.00750924	-0.0107728	0.00226338	-0.00306417	-0.00379894	0.460594	0.34565	0.0912648	0.897508	8.97508e+11	3.77712	11.2051	11.8662
231	-0.000308788	-0.00201082	0.00548088	0.00584627	0.00319074	0.00394365	-0.0133835	0.00127852	0.00204202	-0.00492135	0.00155213	0.00417816	-0.00834128	0.205179	0.0824189	0.140716	0.428314	4.28314e+11	5.74995	25.9661	18.064
232	-0.0103612	0.00389794	0.0227358	0.0252877	-0.000582305	0.00129899	-0.000192463	0.0029597	0.000480361	-0.00099996	-0.000607543	0.00025648	0.00121657	0.0207376	0.0444002	0.020806	0.0859437	85943732000	0.935428	0.687243	2.93874
233	-0.00387467	-0.00115065	0.00149896	0.00431091	-0.00187913	-0.00110106	-0.000177681	0.000889898	0.00185329	-5.75155e-05	-1.55695e-05	-6.41856e-06	0.00160438	0.0315787	0.028007	0.0162637	0.0758494	75849404310	0.796288	0.498002	2.50162
234	-0.00654572	-0.00877469	-0.000519874	0.0109596	0.00318802	0.00162636	0.0105191	0.000298293	0.000697045	0.00234353	0.00668303	-0.0057748	0.0145614	0.153334	0.0333887	0.270192	0.456915	4.56915e+11	0.796288	0.498002	2.50162
235	0	0	0	0	-0.00561528	0.00829967	0.00470706	0.000728286	-0.00531257	-0.00332049	0.0020154	0.0032372	0.00228716	0.18622	0.0936135	0.0753976	0.355231	355231252000	0.275842	0.0597602	0.866587
236	-0.00103767	0.0019016	-0.0124733	0.0126601	-0.00147823	0.00272132	-0.00143687	-0.00481845	-0.000568727	0.000514858	0.00215742	-0.00453944	0.00380054	0.0563642	0.0590203	0.104974	0.220359	2.20359e+11	0.646908	0.328681	2.03233
237	0.00560535	-0.00550529	-0.00947972	0.0123123	0.000711142	-0.000767576	0.00186742	-0.00172673	0.00255103	-0.000350533	-0.00127344	0.0024729	-0.00267038	0.0334613	0.046283	0.0641672	0.143912	1.43912e+11	0.746985	0.438242	2.34673
238	-0.00906543	0.000570316	-0.0134449	0.0162257	-0.00630884	-0.000332991	0.00514138	0.000506845	0.000911028	0.000113053	-0.0059279	0.000151747	0.00497656	0.117832	0.0153093	0.110562	0.243704	243703509000	1.32768	1.38445	4.17104
239	0.00213213	-0.0194711	-0.00917574	0.0216302	0.00637387	-0.0125847	0.0199998	-0.00791554	-0.0159466	0.0190636	-0.00931179	0.0214488	-0.040615	0.389583	0.429257	0.713755	1.5326	1.5326e+12	1.01351	0.806763	3.18405
240	0.000259155	-0.000189311	-0.000568503	0.000652837	-0.00178997	-0.000404698	-0.00253377	-0.00122232	-0.00125174	0.00197865	-0.00695892	0.000497418	-0.00427917	0.0472845	0.0445271	0.117355	0.209167	2.09167e+11	9.50285	70.9137	29.8542
241	0.000196577	0.00148568	0.000638389	0.00162894	-0.00184954	0.00260146	0.00194222	0.000185812	0.00168354	0.00108542	0.00166256	0.000826532	1.91951e-05	0.0639322	0.0295477	0.0250828	0.118563	1.18563e+11	1.13733	1.01592	3.57303
242	0.00821549	0.000229721	0.0239791	0.0253485	0.00102153	0.000453821	0.00231066	0.0347105	-0.00785905	0.0107556	0.0013823	-0.000171509	-0.00248222	0.0378601	0.533252	0.0403604	0.611473	611472620000	1.81582	2.58961	5.70458
243	0	0	0	0	-0.00213686	-0.00141575	-0.00149398	-0.000859109	0.00159602	-0.0018931	-0.00243142	-0.000362841	0.00289187	0.0504659	0.0434823	0.0568614	0.15081	150809549000	0.907909	0.647402	2.85229
244	0	0	0	0	-0.000430154	0.000836691	0.000142273	-8.73546e-05	0.000469634	6.66806e-05	0.000103753	-0.000828847	-0.000576827	0.0140912	0.0062367	0.0150943	0.0354221	35422144400	0.275842	0.0597602	0.866587
245	0.00127882	0.00104952	0.00440205	0.00470265	-0.00181478	-0.00105911	-0.000762295	-0.00139809	0.00191074	-0.00015789	-0.00132331	-0.00119158	0.00272866	0.0363618	0.0346672	0.0524355	0.123465	1.23465e+11	1.05038	0.866524	3.29986
246	0.00431946	0.00357743	-0.0210712	0.0218048	0.0217823	-0.0280113	-0.00052648	0.0189281	-0.016741	-0.00558854	0.0113292	0.00443585	0.0195304	0.503202	0.412576	0.352955	1.26873	1268732563000	3.40826	9.12345	10.7074
247	0.00816283	-0.0176261	0.0434811	0.0476226	0.000685485	0.000281725	-0.000459459	-0.000967136	-0.000848209	0.000158183	-0.000905323	2.66969e-05	-0.00167459	0.0142667	0.0197353	0.0260661	0.060068	60068031400	0.225224	0.0398402	0.707565
248	-0.0044141	-0.0477169	-0.00253843	0.0479878	0.0157688	0.0131886	-0.000222278	-0.00293958	0.0104917	-0.0245883	-0.0180857	-0.0155835	0.00866527	0.291797	0.380195	0.423345	1.09534	1.09534e+12	0.551685	0.239041	1.73317
249	0.00240506	-0.0191489	0.00951568	0.0215177	0.00249573	0.000816324	0.000331779	-0.0017715	-0.00281253	0.000539521	-0.00128298	-0.00209372	0.00454447	0.0364384	0.0512355	0.0792117	0.166886	166885501000	0.666223	0.348601	2.09301
250	0.00229656	0.190194	0.00710789	0.190341	-0.00349208	-0.00111151	0.000583887	-0.00060917	-0.000720987	0.00559239	0.000840303	0.00296912	-0.00162642	0.0518747	0.0692255	0.0543584	0.175459	175458585000	0.251809	0.0498002	0.791082
251	0.000424005	0.000426165	-0.00194552	0.00203628	-0.0011457	-0.000901972	-0.00169618	0.00408963	0.00310911	0.0010118	-0.000574797	-0.000426307	0.000214774	0.0374386	0.0821055	0.0121588	0.131703	1.31703e+11	1.64352	2.12149	5.16329
252	-0.00984795	0.00279574	-0.00136683	0.0103279	-6.27224e-05	0.00065714	-0.000305846	-0.00433623	0.000574424	-0.000885391	0.000917897	0.00128175	-0.000694468	0.0102571	0.0579604	0.0289412	0.0971587	97158685000	0.616802	0.298801	1.93775
253	-0.00925506	0.0392688	-0.00104932	0.0403583	0.000863048	-0.00348942	0.000909625	-0.00124332	0.00146588	0.000213908	0.00384631	0.00139241	0.00132477	0.0526209	0.0292311	0.065635	0.147487	147486970000	0.928624	0.677283	2.91736
254	0.00724891	-0.00236699	-0.017854	0.0194143	-0.00462302	0.0016027	0.0013502	-1.04433e-05	0.000548161	0.000630316	0.00226017	0.000203176	-0.0012017	0.0757591	0.0118892	0.0366504	0.124299	1.24299e+11	0.3901	0.119521	1.22554
255	-0.0145613	0.00822226	-0.0227561	0.0282397	-0.00313715	-0.00203526	-4.94382e-05	-0.00230469	0.00419984	0.00205147	0.00273646	0.00320784	-0.00377466	0.0522185	0.08556	0.0971895	0.234968	2.34968e+11	1.51923	1.81273	4.7728
256	0.00661144	0.00215728	0.00544396	0.00883186	0.000563152	0.00351559	-0.00142637	-0.0023217	4.28824e-06	0.00291464	0.00298374	0.000234446	0.00600864	0.0550512	0.0524064	0.0922682	0.199726	1.99726e+11	3.98628	12.48	12.5233
257	0.000181642	-0.00207378	0.00405851	0.00456125	0.00268092	-0.000183402	0.00131078	8.57912e-05	-0.00257087	-0.00305795	9.5461e-05	-5.35515e-05	0.00401634	0.041751	0.057146	0.0416535	0.140551	140550539000	1.61629	2.05177	5.07774
258	0.0178606	-0.0143754	0.0139598	0.0268427	0.00947005	0.0105111	-0.00168532	0.00480285	-0.0170343	-0.0112704	0.00239401	-0.00888414	-0.0243969	0.216665	0.331076	0.356751	0.904491	904491310000	0.356111	0.0996004	1.11876
259	-8.77657e-05	0.00147436	0.000522504	0.00156667	-0.000919726	-0.000532401	0.00563232	-2.31339e-05	-0.000516589	0.0113755	-0.000581258	-0.00111537	0.00076782	0.0708445	0.119153	0.0246445	0.214642	214641547200	6.05078	28.755	19.0091
260	-0.000547726	-0.00186173	0.00732516	0.00757786	0.0010817	-0.00156325	0.00278253	0.00296667	0.00453876	0.00068471	-0.00309715	0.00893061	0.00101998	0.0542747	0.0819014	0.130477	0.266654	2.66654e+11	1.26407	1.25497	3.9712
261	0.000188228	0.00312298	-0.000880529	0.00325019	-0.0111234	-0.00495112	-0.00774103	-0.00554948	-0.00101618	0.00286646	-0.00591187	0.00370432	-0.00353217	0.238155	0.0943212	0.131484	0.46396	463960120000	4.25992	14.2529	13.383
262	-0.000930414	-0.00990553	-0.0163674	0.019154	0.00033633	0.00129703	0.002702	-0.000805991	-0.00249502	-0.0115994	0.00183918	0.000391088	-0.00161156	0.0433536	0.149004	0.0384182	0.230776	230775884000	1.08599	0.926284	3.41176
263	0	-0.0131778	0	0.0131778	0.0238254	0.0210775	-0.00468074	-0.00183472	0.00390839	0.0198026	0.012272	0.0197544	0.00348585	0.495836	0.255457	0.355122	1.10641	1106414880000	0.3901	0.119521	1.22554
264	0.00177339	0.00617144	0.0192849	0.0203258	-0.0107793	0.00767903	-0.0160822	-0.00672764	0.00633375	-0.0185439	0.0116638	-0.00675339	0.00988721	0.345405	0.316053	0.283044	0.944503	9.44503e+11	1.96668	3.0378	6.17852
265	0.0117089	-0.0370029	0.00199383	0.0388625	0.00315788	0.00769406	0.000747187	-0.0013813	-8.6417e-05	-0.00345715	-0.00132785	0.00114239	-3.13604e-05	0.115991	0.0492487	0.025016	0.190256	1.90256e+11	0.595888	0.278881	1.87204
266	-0.00680784	-0.026899	-0.0169695	0.0325249	0.0106014	0.0128905	0.000513081	0.00540629	0.00403389	0.0014936	0.00674841	0.0115326	0.00282115	0.240051	0.109338	0.211022	0.56041	560410273000	0.788285	0.488042	2.47648
267	0.00169771	-0.00107745	-0.00095169	0.0022246	-0.00159135	0.000861456	-0.00572886	-0.00288072	-0.00145486	-0.00045051	0.00235854	-0.000547569	0.0014276	0.0818167	0.047861	0.0433371	0.173015	173014667000	1.03823	0.846604	3.26171
268	0.0125938	-0.0423452	0.0336936	0.0555607	-0.00671843	0.00461971	0.00570946	-0.00694092	-0.0118212	-0.010821	0.0277907	0.0561084	0.00606474	0.170476	0.295831	0.899639	1.36595	1365945620000	1.37921	1.49401	4.33293
269	-0.0163322	-0.0143386	0.043255	0.048408	0.00248298	0.00134515	0.0019934	0.00486055	-0.00100813	0.00793793	-0.000270737	0.00040774	-0.00239152	0.0582152	0.138066	0.0307	0.226981	2.26981e+11	0.703263	0.388441	2.20937
270	-0.0016386	0.0101038	0.012325	0.0160212	-0.00731906	0.00509499	-0.000102122	-0.00658494	0.00170193	-0.0155404	-0.00802393	0.00711938	0.0084721	0.125162	0.238273	0.236154	0.599589	5.99589e+11	2.41002	4.56169	7.57132
271	0.00313917	-0.00180244	0.0374583	0.0376328	-0.00353676	0.00367492	-0.00401342	0.00469942	0.0157376	-0.0210221	-0.00301892	0.00656925	-0.00697696	0.112251	0.414591	0.165651	0.692494	692493820000	2.60229	5.31866	8.17537
272	-0.00219129	0.000675332	0.00201777	0.00305438	-0.01136	0.0100351	0.00230212	-0.0302958	0.00343858	-0.0161296	0.00906508	0.00193049	0.0047246	0.236972	0.49864	0.157202	0.892814	892813820000	2.2182	3.86448	6.9687
273	0.00609409	0.0029227	0.000501342	0.00677728	-0.00773971	0.00118153	-0.00134495	0.00282478	0.00134468	0.000721943	0.00324416	-0.0017403	-0.000906963	0.102662	0.048914	0.0589143	0.21049	2.1049e+11	1.34665	1.42429	4.23063
274	-0.0041175	-0.00252245	-0.000475246	0.00485206	0.00399099	-0.0222485	-0.0107682	-0.00146375	0.0229211	8.81306e-05	0.00667254	-0.00383624	-0.00269433	0.370077	0.24473	0.132031	0.746838	7.46838e+11	0.225224	0.0398402	0.707565
275	0.0023095	-0.00271159	-0.00214439	0.00415751	0.00251672	0.00185835	0.000633076	0.00018088	0.0145141	0.0176256	0.0112698	0.00298455	0.00200454	0.0500815	0.323206	0.162589	0.535876	5.35876e+11	2.24377	3.95412	7.04904
276	0.00203427	0.00589144	-0.0566953	0.0570369	0.0165565	-0.00622791	0.00964594	0.0111031	-0.0535041	0.0382504	0.00788116	-0.00813815	-0.00982768	0.324303	1.02858	0.25847	1.61135	1.61135e+12	1.90777	2.85852	5.99346
277	0.000359365	0.0115092	0.0106831	0.0157074	-0.000498444	0.00686615	-0.00221183	0.00330174	0.00115646	0.000483749	-0.00087777	0.000776168	-0.00207101	0.0957643	0.0494195	0.0372495	0.182433	1.82433e+11	1.48118	1.72309	4.65329
278	-0.00355034	0.0013813	-0.0033779	0.00509147	-0.00446614	0.000469036	-0.00015344	-0.00638388	0.00356247	0.00100102	-0.000340521	0.00263934	-0.000146695	0.0508862	0.109474	0.0312655	0.191625	1.91625e+11	1.80531	2.55973	5.67155
279	0.00281298	0.00707955	0.00994021	0.0125236	0.00946255	0.0196712	-0.0176864	0.0305191	0.0438516	0.0182068	0.00690876	0.00721381	0.00431356	0.468202	0.925775	0.184361	1.57834	1578338420000	2.93872	6.78281	9.23229
280	-0.0145944	-8.84948e-05	0.00351826	0.0150128	0.0134475	-0.0095784	0.00715712	-0.00335172	-0.0171667	-0.0024425	0.0136258	-0.00524481	-0.00832435	0.30183	0.229609	0.271949	0.803388	8.03388e+11	1.19177	1.11553	3.74408
281	0.00868112	-0.00303993	-0.010629	0.0140563	-0.00271897	0.00627842	0.00236882	-0.00798145	0.00127069	0.00256202	-0.0141739	0.00754555	0.0208078	0.113662	0.118142	0.425272	0.657076	657076080000	3.07786	7.44018	9.6694
282	-0.00645552	-0.000495346	-0.00507045	0.00822366	-0.00373145	-0.000731897	0.00105891	-0.000820462	0.00143262	-0.00360835	0.000264069	-0.00143371	0.00148502	0.0552226	0.0586143	0.0318279	0.145665	145664764000	0.988168	0.766923	3.10443
283	-0.00210808	0.0153573	0.0681952	0.0699348	-0.00388615	0.00104458	0.00159998	0.00853437	-0.00100417	0.00176644	0.0278707	0.0043979	-0.00682052	0.0653071	0.11305	0.390891	0.569248	5.69248e+11	1.27903	1.28485	4.01819
284	-0.000638581	-0.00315836	-0.00273705	0.00422782	0.000869757	0.000767724	-0.00129686	-0.003333	-0.000840835	0.000177826	0.00173727	0.000452265	-1.37238e-06	0.0293434	0.0435166	0.021909	0.0947691	9.47691e+10	8.52473	57.0817	26.7813
285	-0.00216457	-0.000755294	-0.0156533	0.0158203	0.00777896	-0.00113393	-3.02002e-05	0.00378243	-0.000613	-4.62985e-06	0.00882332	-0.00168431	0.000228986	0.0894309	0.0440006	0.107366	0.240798	2.40798e+11	1.24384	1.21513	3.90766
286	-0.00237385	0.00178113	0.0107315	0.0111343	-0.00231448	-0.000755428	-0.000666116	-0.00171456	-0.00264444	-0.0043192	-0.00584913	-0.00401197	-0.00299138	0.0373602	0.0867821	0.128525	0.252667	252667178000	1.48118	1.72309	4.65329
287	-0.00371058	-0.00448949	0.0123341	0.0136401	-0.00646302	-0.00293542	0.00529047	0.0241653	-0.00924366	-0.00234247	0.013739	-0.0114876	-0.000548039	0.146889	0.357514	0.257746	0.76215	762149564000	3.12486	7.66926	9.81706
288	-0.057421	-0.00483322	0.0325882	0.0662006	-0.00740739	-5.05947e-05	0.00558229	0.00249907	-0.00785072	-0.0100727	-0.00214813	-7.90963e-05	0.0074042	0.130403	0.204225	0.0963143	0.430942	430942140700	0.477773	0.179281	1.50097
289	0.000814539	3.50494e-05	0.00647985	0.00653094	0.0014184	0.000281625	0.00301866	-0.00594571	0.00018454	-0.00539259	0.000911623	-9.51192e-05	-0.000691318	0.0471868	0.115228	0.0169806	0.179396	179395843000	1.62802	2.08165	5.11458
290	0.00788212	0.0281032	0.00954674	0.0307093	0.0065	-0.0134266	0.00174827	0.0179959	-0.0084123	0.0126046	-0.0161714	0.0132556	-0.0177967	0.216749	0.390128	0.472237	1.07911	1079113550000	1.04432	0.856564	3.28085
291	0.00358483	0.0169948	0.0221254	0.0281284	-0.0156744	0.0108408	-0.0027302	-0.0144646	0.0033858	-0.00388798	0.0491508	-0.0184039	0.0118783	0.292454	0.217383	0.794331	1.30417	1304168100000	1.33245	1.39441	4.18601
292	0.00205512	-0.00193696	0.0104003	0.0107769	-0.00185794	-0.016513	0.00334165	0.0107728	0.00367181	0.00680362	-0.0156635	0.00265824	0.0160229	0.217126	0.212483	0.343447	0.773056	7.73056e+11	3.33112	8.71508	10.465
293	0.0575887	-0.0112915	0.0210626	0.0623505	-0.00320914	0.00294511	-0.00534446	0.0035528	-0.00153658	0.00276377	0.00531839	-0.00322027	0.00520229	0.114987	0.0785315	0.137409	0.330928	330928000000	0.528198	0.219121	1.65939
294	0.000587717	0.000800209	-0.00987217	0.00992197	-0.000611419	-0.000526491	-0.000382561	0.000923255	0.00262316	0.000337081	0.00132599	0.00168507	0.00061643	0.0152047	0.038835	0.0362749	0.0903146	9.03146e+10	0.850204	0.567722	2.671
295	0.00885652	-0.0146257	0.000179599	0.0170991	0.0031014	0.00306623	0.00434126	0.00491724	-0.00172627	0.00346491	-0.00208793	-0.00142532	-0.00463967	0.105089	0.101084	0.0815292	0.287702	287702280000	1.09761	0.946204	3.44825
296	-0.00862226	-0.00895083	-0.011782	0.0171253	0.00950202	0.00952613	0.0158596	0.0292476	0.0134549	9.36384e-05	-0.0190732	0.00682416	0.00379152	0.348878	0.427961	0.296889	1.07373	1.07373e+12	1.13174	1.00596	3.55547
297	0	-0.00643125	0.0163748	0.0175925	-0.00327404	-0.00737229	0.000442193	-0.00169124	0.00071357	-0.00601513	0.00402057	0.00842732	0.00178332	0.110885	0.0841995	0.142312	0.337397	337396802000	1.08014	0.916324	3.39336
298	-0.0165816	0.019833	-0.0117691	0.0284044	0.00395565	0.00187116	-0.00598721	-0.00393971	-0.00262493	0.00572997	-0.000220876	0.00276743	-0.00172528	0.11814	0.122946	0.0471359	0.288222	288222211000	1.72998	2.35057	5.43491
299	0.00262318	0.0058731	0.0102489	0.0121001	0.00269501	0.00411949	-0.0017584	0.00168516	-0.00166346	0.000888877	-0.000252832	-0.00109161	0.00335351	0.085729	0.042375	0.0469796	0.175084	1.75084e+11	0.893832	0.627482	2.80806
300	-0.0208892	0.0211017	-0.0209865	0.0363603	-0.0057236	0.0123547	-0.00405317	0.0294317	0.0388293	-0.00464459	-0.00188086	0.00617139	0.0116571	0.221315	0.729055	0.197093	1.14746	1147463040000	0.406029	0.12948	1.27558
301	-0.00214867	0.0201801	-0.00635089	0.0212647	-0.0041857	-0.00227237	0.00471908	-0.00160125	-0.00102033	-0.00323963	0.00232336	0.000274291	-0.0011521	0.111771	0.0586121	0.0374976	0.207881	207881115000	1.84009	2.65933	5.78084
302	-0.0130617	-0.0001504	0.00100147	0.0131009	-0.00300869	-0.00300163	-0.00280219	0.0100849	-0.0123645	-0.0110961	-0.0169159	-0.00282259	0.000154526	0.0881251	0.335455	0.19893	0.622511	622510864000	1.93745	2.94816	6.08668
303	-0.00469227	7.53342e-05	0.0181997	0.018795	-0.00102964	-0.0152359	0.0210013	0.0228605	-0.0447045	0.0246276	-0.0156775	-0.0156715	0.0141793	0.372669	0.921926	0.455284	1.74988	1.74988e+12	1.88436	2.7888	5.91991
304	-0.0108229	0.00149924	0.0149974	0.0185554	0.000458208	-0.00268771	-0.00524455	-0.00184928	-0.00111781	0.000291903	-0.00153964	0.00141666	-0.00841775	0.0839047	0.0325899	0.11374	0.230235	230235048000	2.11878	3.52584	6.65635
305	-0.0104494	0.0105345	-0.00297932	0.0151341	0.0049374	-0.00312176	-0.00043911	0.00296617	-0.000321758	-0.00149999	0.00692263	-0.00103133	-0.000671038	0.0849827	0.0478791	0.0862501	0.219112	2.19112e+11	1.40653	1.55377	4.41874
306	0.0215953	0.000587228	0.000900985	0.0216221	-0.00371603	-0.0124867	0.00906328	0.0014544	0.00215212	0.0197061	0.000117769	-0.0238296	-0.00265581	0.25266	0.233126	0.266031	0.751817	7.51817e+11	3.06752	7.39038	9.63693
307	0.00234411	0.00748204	-0.058242	0.0587674	0.0350246	0.0249198	-0.0444584	-0.0187581	-0.0256554	0.0405593	0.00515154	0.00164781	0.00283459	1.04403	0.849727	0.0963394	1.99009	1990094920000	1.23361	1.19521	3.8755
308	-0.0351364	0.00262031	0.000433851	0.0352366	0.00419821	0.00123685	0.00224626	0.00201003	-0.0106738	0.00148449	0.00218038	-0.0028481	-0.00381601	0.0768132	0.141684	0.0884449	0.306942	306941710000	0.373493	0.10956	1.17336
309	-0.0227572	0.00352985	0.043063	0.0488342	-0.000153857	0.00335615	-0.000641655	-0.00164028	0.000483184	0.00120209	0.000307829	0.000343924	2.84446e-05	0.0415166	0.0332555	0.00680197	0.0815741	8.15741e+10	0.436145	0.149401	1.37019
310	-0.0170303	-0.0200465	0.0016982	0.0263586	0.00370343	0.0022794	0.0019898	0.00350751	-0.0033965	1.06368e-05	-7.95086e-05	0.00212865	0.00779817	0.0797262	0.0691465	0.100063	0.248936	2.48936e+11	0.585151	0.268921	1.83831
311	-0.0244509	0.00253644	0.0057779	0.0252521	0.000626196	0.00225405	0.000442507	-0.00152289	-0.000434395	0.000531039	0.00113654	0.00134137	0.000142893	0.0332275	0.0248832	0.0262081	0.0843188	8.43188e+10	0.684994	0.368521	2.15198
312	0.00318154	0	0	0.00318154	0.0165441	-0.0147686	0.0122638	0.0136991	-0.00702498	0.00976216	-0.0128793	0.0167675	-0.00990996	0.435764	0.304862	0.395568	1.13619	1136193980000	0.755426	0.448201	2.37325
313	0.000778724	-0.000956819	-0.00043477	0.00130803	0.000692978	0.00332473	-0.000459635	-9.72828e-07	0.00243172	-0.000844997	-0.00064911	0.0034948	-0.00279722	0.0447734	0.0327769	0.0694113	0.146962	1.46962e+11	9.02235	63.9243	28.3446
314	-0.15962	0.0595949	-0.0398806	0.174988	0.00165483	0.00918116	-0.014721	-0.00562147	0.00534793	-0.0122619	-0.000483827	0.00388077	-0.0079448	0.25557	0.232313	0.123094	0.610976	6.10976e+11	0.684994	0.368521	2.15198
315	0	0	0	0	0.0014981	-0.000671207	0.00238339	0.00226664	-0.00167483	0.00153479	0.000322976	-0.000221112	-3.73635e-05	0.045527	0.0547626	0.00581451	0.106104	1.06104e+11	0.606436	0.288841	1.90518
316	-0.0480031	0.00501292	-0.0024085	0.0483242	0.0312853	0.0018214	-0.00146534	-0.0172484	-0.00858186	0.0181	0.0198493	0.0151133	0.00709623	0.34572	0.439303	0.420589	1.20561	1205611480000	1.41999	1.58365	4.46103
317	0	0	0	0	-0.0115605	0.000823515	0.0094668	0.0366384	-0.000185379	0.00711555	-0.00141525	-0.016351	-0.0136569	0.218509	0.439393	0.314231	0.972133	972133479000	0.3901	0.119521	1.22554
318	0.00885396	0.0132249	-0.00829145	0.0179454	0.00181854	-0.000604259	0.000371453	-0.00068045	-0.00169988	0.000229947	0.000302108	-0.00048898	0.00267966	0.0279426	0.0261028	0.0347075	0.0887528	88752844000	1.02595	0.826684	3.22312
319	-0.00212529	0.00602077	0.00944993	0.0114047	-0.00325219	-0.0229308	0.000879219	0.0143393	0.000390142	-0.00696576	-0.00284558	-0.0142873	-0.00143188	0.270623	0.216952	0.185648	0.673222	673222497000	1.15393	1.04581	3.62519
320	-0.0104714	-0.0028089	0.00513812	0.0119975	-0.00881113	0.0480272	-0.0130137	0.0511777	0.0330063	-0.0154288	0.00869002	-0.039558	0.0660401	0.69852	0.996129	1.14288	2.83753	2.83753e+12	1.62021	2.06173	5.09005
321	-0.00378262	-0.00143012	-0.000558109	0.00408227	-0.00782358	5.02488e-05	0.00563216	0.0125266	-3.22935e-05	0.0325389	0.00414698	-0.00717576	-0.00261297	0.13506	0.450978	0.139357	0.725395	7.25395e+11	4.67722	17.1812	14.694
322	-0.011444	-0.00656884	0.0228498	0.0263861	0.000735852	0.00354621	0.00130646	-0.00158915	-0.0013856	0.000252208	0.00105262	0.00335988	-0.00400091	0.0558853	0.0322695	0.0841342	0.172289	172289010000	0.540069	0.229081	1.69668
323	-0.00022456	-0.00301324	0.00238239	0.00384784	0.0175038	0.000840434	-0.0124485	-0.0174132	-0.00493183	0.00189133	-0.00775117	-0.0032701	0.0103318	0.307928	0.242363	0.213531	0.763822	763821804000	1.93418	2.9382	6.07641
324	0.0014377	0.00220144	-0.00833584	0.00874069	0.00213004	0.000358919	0.0018926	-0.000867808	-0.000537301	-0.00155987	0.00267438	0.00110563	0.00273591	0.0438156	0.0296498	0.0651592	0.138625	138624544000	0.763773	0.458161	2.39947
325	-0.00666038	-0.00564971	0.00683711	0.0110917	-0.00475872	0.00195209	-0.00457105	-0.0068843	0.000848884	-0.00873758	0.00277044	0.00545838	0.00278999	0.112819	0.164708	0.110188	0.387714	387714248000	1.64737	2.13145	5.17538
326	-0.00290551	0.0090185	-0.00274456	0.00986448	0.00153823	0.00481806	-0.00173985	-0.000465137	0.000217247	0.00051426	0.00145162	0.0030196	-0.00156204	0.0809614	0.0119664	0.0603326	0.15326	153260438000	0.373493	0.10956	1.17336
327	0	0	0	0	0.00311662	0.000810811	-0.00169975	3.09794e-05	-0.00148217	-0.0021198	0.00102361	0.00254937	-0.00674316	0.0562718	0.0363295	0.103161	0.195763	195762731300	0.464312	0.169321	1.45868
328	0.00728685	-0.0124471	0.00415394	0.0150095	-0.0273129	0.00560793	0.0250541	-0.000549914	-0.0313689	0.0131043	-0.0101666	0.00124063	0.0260398	0.579749	0.450232	0.374471	1.40445	1.40445e+12	0.948887	0.707163	2.98102
329	0.000773025	-0.00109691	-0.00209137	0.00248488	-0.0221789	0.00798785	-0.0198324	-0.0198371	0.00200841	-0.0103072	0.0407697	0.0242591	0.0427982	0.499991	0.321527	1.07827	1.89979	1899788310000	3.65944	10.5179	11.4965
330	0	0	0	0	-0.00280205	0.00615061	0.0105687	0.00672451	0.00650618	-0.0124761	-0.00642471	0.00385186	0.00572177	0.195214	0.257068	0.159984	0.612265	6.12265e+11	0.516054	0.209161	1.62124
331	0.0246547	-0.00933853	0.0510427	0.0574493	0.00308963	-0.00330139	-0.00052686	-0.00238689	-0.00341408	-5.2123e-05	-0.00410521	0.00162259	-0.00447617	0.0691788	0.058531	0.10204	0.229749	2.29749e+11	1.1703	1.07569	3.67662
332	-0.0040458	-0.0337643	0.0248528	0.0421196	0.0190534	0.00492792	-0.00943015	-7.85864e-05	-0.00268357	-0.00984488	0.000137082	0.00945873	0.00288107	0.334115	0.12607	0.124769	0.584954	5.84954e+11	1.57657	1.95217	4.95295
333	-0.0120054	0.0219576	0.00127622	0.0250579	0.00294006	-0.00987492	-0.000357983	-0.000764709	0.0237564	-0.00183602	-0.00421138	-0.00655473	-0.00228034	0.13173	0.263571	0.130465	0.525765	5.25765e+11	0.88671	0.617522	2.78569
334	-0.00228848	0.0018737	-0.00119891	0.00319144	0.00245649	-0.00170948	-0.00482345	-0.00296403	0.00399707	0.00828646	-0.00256855	-0.00247546	-0.00232554	0.0898942	0.152476	0.0736954	0.316065	316065240000	0.968727	0.737043	3.04335
335	0.0117787	-0.00296936	0.000934929	0.0121832	-0.0107808	-0.00481244	0.0187775	0.00877413	-0.00662489	0.0128589	0.0139709	0.0118314	-0.0105462	0.343708	0.28258	0.363485	0.989772	989772070000	0.738447	0.428281	2.31991
336	-0.0162053	-4.83237e-05	-0.011922	0.0201183	-0.00249335	-0.00160458	0.000168987	0.000374085	-0.00110354	-0.000909011	-0.00151176	-0.00659927	0.000780393	0.0426692	0.0238663	0.0889141	0.15545	1.5545e+11	0.516054	0.209161	1.62124
337	-0.0110496	0.00674057	0.0126927	0.0181283	-2.54171e-06	0.00622353	0.00259341	-0.00869221	0.00117891	-0.000870776	0.0125778	-0.00747442	0.0305563	0.0881948	0.107419	0.506085	0.701699	701699204150	2.13072	3.56568	6.69388
338	0.0313886	0.00786896	0.0139418	0.0352355	1.53232e-05	-7.09425e-05	-0.000112155	0.000236649	0.000329364	0.000558133	-0.000325693	-0.000181263	-0.000192839	0.0019842	0.0112415	0.00699796	0.0202236	2.02236e+10	0.318516	0.0796803	1.00065
339	-0.00583465	-0.0155715	0.00795462	0.0184334	-0.00197209	0.00187714	0.012203	-0.00394396	-0.000398173	0.00486297	-0.00165049	0.0043687	-0.0075889	0.160522	0.092051	0.136081	0.388654	388654198000	1.17571	1.08564	3.6936
340	-0.00169644	0.000887812	0.00109767	0.00220704	-0.000198827	0.00313209	0.00137074	0.00146301	-0.00185923	0.00141558	0.00140342	0.00212222	0.00126489	0.0470166	0.0473782	0.0479053	0.1423	142300133000	0.72107	0.408361	2.26531
341	0.0174341	-0.00279259	0.00520071	0.0184064	-0.00663402	-0.00531674	0.000922235	-0.00133566	0.000530066	0.00392857	0.00373792	-0.0123127	-0.00147892	0.12873	0.0579429	0.175295	0.361968	3.61968e+11	2.15144	3.6354	6.75898
342	0.00171499	-0.000445778	-0.00115468	0.00211499	-0.0311912	0.031688	-0.0144969	-0.0121245	0.0087021	0.00024809	-0.00720646	0.000912853	-0.000227969	0.773761	0.210747	0.0834728	1.06798	1.06798e+12	0.968727	0.737043	3.04335
343	-0.000382912	0.000139056	-0.000561977	0.000694101	-0.00302744	-0.00237592	-0.00219551	-0.000353187	0.00187965	-0.00495475	-0.00102504	0.0101976	-0.00222201	0.0759887	0.0718759	0.134447	0.282311	282311485000	10.2578	82.6423	32.2259
344	-0.000886515	-0.00302307	0.00906737	0.00959907	0.00353946	0.00253083	-0.00368473	0.00102572	0.000515952	-1.34069e-05	-0.000129721	-0.00126267	0.000536317	0.0975502	0.0155508	0.0192871	0.132388	132388117600	0.7802	0.478082	2.45108
345	0.103168	-0.0906485	0.205098	0.246832	3.76721e-06	-0.00127876	0.0016911	-0.00192045	-0.000192289	-0.00203031	-0.000329005	-0.000842742	-0.00125734	0.0297363	0.0414305	0.0242909	0.0954576	9.54576e+10	0.907909	0.647402	2.85229
346	-0.0778508	-0.0304024	0.0612278	0.103604	-0.0224739	0.0280334	-0.0183468	0.00233238	-0.001584	-0.015058	0.0484144	-0.026845	-0.00101286	0.688541	0.189744	0.762723	1.64101	1641007890000	0.666223	0.348601	2.09301
347	-0.0543804	0.0155808	0.0429718	0.0710392	-0.000324298	0.00160294	0.00452561	-0.00431996	-0.00226656	-0.00212178	-0.00128507	0.00163452	0.000111168	0.0645285	0.0870831	0.0303076	0.181919	1.81919e+11	0.251809	0.0498002	0.791082
348	0.00101961	-0.0035676	-0.00103918	0.00385321	0.00274915	0.00174821	0.00119538	0.00620418	-0.00205128	-0.00300666	-0.00565144	-0.00032367	0.00237495	0.0569273	0.112621	0.0835007	0.253049	2.53049e+11	1.53169	1.84261	4.81197
349	0	-0.0757801	-0.199212	0.213138	-0.0072149	0.0127665	-0.000143363	-0.00425355	0.00753283	-9.18265e-05	0.00680745	-0.0125237	0.00069036	0.201248	0.118782	0.200216	0.520246	520245635100	0.225224	0.0398402	0.707565
350	0.0084264	0.00403139	0.00410016	0.0102014	0.00157066	0.00258117	-0.00503299	0.00346674	0.00572157	-0.000156144	-0.00229368	-0.00114922	0.000836417	0.0918482	0.0934445	0.0427932	0.228086	2.28086e+11	1.1703	1.07569	3.67662
351	0	0	0	0	0.00101975	-0.00295973	0.00156084	0.00419279	-0.000828706	-0.00120211	-0.000711062	0.000586587	-0.000857449	0.0554032	0.062236	0.021551	0.13919	139190149000	0.464312	0.169321	1.45868
352	-0.0157115	0.0617686	-0.00902321	0.064371	0.0017954	-0.00037051	-0.00643764	0.00285907	0.0107616	-0.0189689	-0.000122738	0.0119429	-0.0142755	0.0860355	0.325896	0.263412	0.675344	6.75344e+11	0.606436	0.288841	1.90518
353	-0.00219623	-0.00225978	0.0015034	0.00349145	-0.00149854	-0.0111664	0.00151939	-0.00162088	-0.0155093	-0.0132458	-0.00094434	-0.0115627	-0.0085919	0.141843	0.30376	0.210989	0.656593	656592937000	2.39417	4.50193	7.52151
354	-0.000574963	0.00441544	0.000250859	0.00445978	0.00784878	0.0199262	-0.0185303	-0.00297845	0.0306866	-0.00221441	0.0147788	0.02493	-0.0109626	0.463052	0.358794	0.506714	1.32856	1328560140000	2.22106	3.87444	6.9777
355	0.00135127	0.0259834	-0.026577	0.0371927	-0.00439023	-0.0123841	0.00218507	0.00387491	0.0057301	-0.0104045	-0.0275572	-0.0196487	0.0199949	0.189594	0.200095	0.672008	1.0617	1.0617e+12	1.26407	1.25497	3.9712
356	-0.00239069	-0.00772744	-0.00936737	0.0123764	-0.00385779	-0.000493666	0.000745549	0.0010677	-0.00199157	-0.00333287	0.00082882	-0.00381545	0.00184529	0.05097	0.0639214	0.0648956	0.179787	179787029000	1.07425	0.906364	3.37487
357	-0.000985757	-9.37609e-06	-0.000820947	0.00128287	-0.00784324	0.00305359	0.00177263	0.0015875	0.00326135	0.000326127	0.000636229	-0.000721796	-0.00394751	0.126695	0.0517498	0.0530553	0.2315	231499645000	1.27406	1.27489	4.0026
358	-0.0117066	-0.00545616	-0.00773876	0.0150566	0.0050487	0.00688925	-0.000475276	0.00368977	-0.00443605	0.000210551	0.00621437	-0.00646614	0.00522781	0.124132	0.0833638	0.179083	0.386579	3.86579e+11	1.16487	1.06573	3.65956
359	0.0131029	-0.0116251	-0.00850085	0.0194704	0.000966177	0.000859586	-0.00244188	0.00221522	-0.000173692	-0.00181516	-0.0016298	0.00130937	-0.000830482	0.0426764	0.0420408	0.0376965	0.122414	122413725000	0.528198	0.219121	1.65939
360	0.0142434	-0.0065068	-0.00428485	0.0162349	0.0185402	-0.0087312	0.00490775	0.00163788	-0.00794416	-0.000371792	0.00384891	-0.00152988	0.00922234	0.321791	0.0995383	0.146011	0.567341	5.67341e+11	1.83665	2.64937	5.77
361	0.000470727	0.000717393	0.00585972	0.00592221	0.00187245	-0.000509358	0.00119644	0.00319916	0.000323849	0.00122206	-0.00180069	0.00126809	-0.00060682	0.0357825	0.0474506	0.036756	0.119989	1.19989e+11	1.37461	1.48405	4.31847
362	0	0	0	0	-0.00541958	0.007528	0.00106394	-0.011514	-0.00247978	0.00785958	-0.012277	0.00703793	-0.00224358	0.140115	0.218534	0.215585	0.574234	5.74234e+11	0.406029	0.12948	1.27558
363	0.000897347	0.00161842	-0.000973	0.00209075	0.00336924	0.00188394	-0.00299398	-0.00247145	-0.000953083	0.00375124	0.00584141	-0.00261978	-0.00101517	0.0824716	0.0717577	0.0947637	0.248993	2.48993e+11	3.16116	7.84854	9.93109
364	-0.00814055	0.00802731	-0.0136691	0.01782	-0.0030424	0.000871893	-0.00300952	0.00263338	-0.000911258	0.000202131	0.00227356	0.000633679	0.000964059	0.0692381	0.0374677	0.038713	0.145419	1.45419e+11	0.490865	0.189241	1.5421
365	0.00534633	-0.00181944	0.00794826	0.00975031	-0.0120753	0.00179871	-0.0148355	0.00298915	-0.0137209	0.0286982	0.00379859	0.00299637	0.0158422	0.287095	0.454083	0.226372	0.96755	967550050000	2.93872	6.78281	9.23229
366	0.000680456	0.000477472	0.0116969	0.0117264	0.00836574	0.0146638	0.0119313	-0.0159834	-0.00185275	-0.00984419	0.0187871	-0.000835076	0.0213183	0.349608	0.276803	0.409404	1.03582	1035815844000	3.51996	9.73102	11.0583
367	0.00828381	0.00320196	-0.0276714	0.0290617	-0.0101118	-0.000183909	0.00858102	-4.38757e-05	0.00251514	-0.00083922	-0.0140453	0.00348745	0.00898791	0.188767	0.0339823	0.265207	0.487956	4.87956e+11	1.07425	0.906364	3.37487
368	-1.52239e-05	0.00121904	-0.000610768	0.00136357	0.00188807	-0.00146775	0.00232503	-0.000752634	-0.000382224	-0.00741326	0.00590294	0.000502139	0.0107217	0.0568085	0.0854812	0.171268	0.313558	3.13558e+11	2.03015	3.237	6.37791
369	0.0238819	0.000693905	0.00185469	0.0239639	-0.00134998	-0.000206534	-0.00140748	-0.0012325	0.000256794	0.00524053	-0.000418427	0.000677555	-0.000437384	0.0296399	0.0672983	0.0153337	0.112272	112271848000	0.450449	0.159361	1.41513
370	0	0	0	0	0.00110998	0.00243212	-0.000961376	7.96918e-05	-0.00423614	0.00329116	-0.00417771	0.00173348	-0.00467582	0.0450347	0.0760699	0.10587	0.226975	2.26975e+11	0.225224	0.0398402	0.707565
371	0.00352538	0.00229606	0.000927126	0.0043081	0.00108402	0.0061735	-0.00216925	-0.0035694	-0.000191087	-0.0043917	-0.000797749	0.000768337	0.00232167	0.0942676	0.0815219	0.0388776	0.214667	214667100000	1.67789	2.21113	5.27125
372	0.00119062	-0.00264817	-0.0160142	0.0162753	0.0029394	-0.00251364	0.00170462	-0.00414724	-0.00202368	0.00785239	-0.00109361	0.00196886	0.00120171	0.0715766	0.140233	0.0426417	0.254452	254451510000	0.574212	0.258961	1.80394
373	-0.0614549	-0.00242491	-0.0127742	0.0628154	0.00547995	0.000988085	-0.00173954	-0.000241378	0.00579102	-0.0019273	-0.00137152	-0.00930978	-0.00554621	0.0820758	0.079597	0.162275	0.323948	3.23948e+11	0.948887	0.707163	2.98102
374	0	0	0	0	0.00212241	-0.00642843	0.000784202	0.00138972	-0.000867437	0.00861148	-0.000300169	0.00138732	0.00832319	0.0933504	0.108686	0.100107	0.302144	302143524000	1.83319	2.63941	5.75915
375	0.000594474	0.0205028	0.0124244	0.0239809	-0.000287637	-0.000174836	0.000247604	0.000789371	-1.62857e-06	-0.000691682	-0.00037964	7.06959e-06	0.000168383	0.00710077	0.0148268	0.00555093	0.0274785	2.74785e+10	0.275842	0.0597602	0.866587
376	-0.00834173	-0.000184467	-0.0108104	0.0136559	-0.0165618	0.0195795	-0.00779816	-0.0533273	0.0486504	-0.0320482	-0.0500598	0.0406272	-0.0298896	0.439395	1.34026	1.20577	2.98542	2985419790000	1.07425	0.906364	3.37487
377	0.0224317	-0.0185036	0.00126509	0.0291061	-0.00398912	0.000373899	0.00313177	-0.00367683	-0.00326287	0.00174573	0.00579503	-0.000338961	0.0027563	0.0749478	0.0868543	0.088903	0.250705	2.50705e+11	0.738447	0.428281	2.31991
378	0	0	0	0	0.0121164	-0.00275646	0.00332489	0.00798472	-0.0063682	-0.000682619	-0.00571293	0.00316962	0.00253192	0.181978	0.150355	0.114145	0.446478	4.46478e+11	0.297944	0.0697203	0.936021
379	0	0	0	0	0.00301889	0.0209571	0.00751616	-0.000406934	-0.00909781	-0.00118112	-0.00442123	-0.0103633	-0.00273139	0.314922	0.106859	0.175159	0.596939	5.96939e+11	0.850204	0.567722	2.671
380	0.0528272	0.0565781	0.320649	0.32986	0.0145365	-0.000558789	-0.00485759	0.00015644	0.010139	0.000171527	0.033353	-0.0191638	-0.0162726	0.199529	0.10467	0.687894	0.992093	9.92093e+11	0.275842	0.0597602	0.866587
381	0	0	0	0	0.0194519	-0.0104379	-0.0238783	0.0012957	-0.00225201	-0.00779807	0.00641187	-0.00273115	-0.00577447	0.537682	0.113458	0.149175	0.800314	8.00314e+11	0.421356	0.139441	1.32373
382	0	0	0	0	0	0	0	0	0	0	0	0	0	0	0	0	0		0.159258	0.0199201	0.500324
383	0	0	0	0	0.00154249	0.0001326	0.0100336	-0.000633843	-4.21773e-05	-0.00396303	-0.00105298	-8.87677e-05	-0.00682695	0.117087	0.0463905	0.079687	0.243165	243164555500	0.297944	0.0697203	0.936021
384	0	0	0	0	0	0	0	0	0	0	0	0	0	0	0	0	0		0.19505	0.0298801	0.612769
385	0	0	0	0	0	0	0	0	0	0	0	0	0	0	0	0	0		0.159258	0.0199201	0.500324

## Sheet: CMT16-8_SV
																	Min	48537008000
	CMT-16-8_SV	One point per grain	Average	0.0153544													Average	4.05349e+11
	nb grains =	122	Median	0.00641972													Median	245783090000
Grain	q13	q23	q33	rqtotal	ac11	ac12	ac13	ac21	ac22	ac23	ac31	ac32	ac33	rac1j	rac2j	rac3j	rac total	rac total	grain size	grain surface	grain perimeter
ID	(in mm-2)	(in mm-2)	(in mm-2)	(in mm-2)										(in mm-2)	(in mm-2)	(in mm-2)	(in mm-2)	(in m-2)	mm	mm2	mm
1	-0.00162368	-0.00031159	0.00527503	0.00552805	2.52701e-05	-7.74738e-05	-0.000291792	0.000977403	0.00203289	0.000479065	-0.000428734	-0.00295903	-0.000519102	0.00394536	0.0348936	0.0390687	0.0779076	7.79076e+10	1.63128	2.09	5.12482
2	-0.00201912	0.00748927	0.0576581	0.0581775	-0.00105846	0.00134949	0.000205371	0.00125455	-0.00131874	-0.000225955	0.00820071	-0.0040794	-0.00123184	0.0261332	0.0279924	0.135119	0.189245	1.89245e+11	0.451352	0.16	1.41797
3	0.00128686	0.00111285	0.00182587	0.00249565	-0.00915678	0.00102656	-0.011699	-0.00933851	-0.00494778	-0.0143874	0.0015256	-0.0102212	-0.00685773	0.218824	0.286737	0.186046	0.691606	691606290000	6.30669	31.2406	19.8131
4	0.00195828	-0.0145747	0.0061856	0.0159536	0.000648449	-0.000843283	-0.00101412	0.000115671	-0.000245655	-0.000225083	0.000492371	-0.000591403	-0.000756701	0.0250585	0.00586409	0.0184047	0.0493274	4.93274e+10	0.252313	0.05	0.792667
5	-0.00984628	0.00624162	0.0132554	0.0176525	0.00342673	0.0023173	0.00239233	0.00066337	0.000605133	0.000538957	0.00276072	0.00194009	0.00175694	0.0813635	0.0180746	0.0645776	0.164016	164015733000	1.34462	1.42	4.22426
6	-0.00447927	0.00679747	0.00663605	0.0105027	-0.00260974	0.000361165	-0.00104248	0.000775766	-0.000586397	0.00146505	0.00215301	0.0011789	0.00171311	0.0401339	0.0282721	0.0504502	0.118856	1.18856e+11	1.89151	2.81	5.94236
7	0.00577426	0.033789	0.0356626	0.0494657	0.00433917	-0.00682506	-0.00867747	-0.0041477	0.0047278	0.00280891	0.0085705	-0.00528476	-0.0132128	0.198417	0.116844	0.270681	0.585942	5.85942e+11	1.15073	1.04	3.61512
8	0.00209359	-0.00250763	-0.00666447	0.00742203	-1.91436e-05	0.000642707	0.000175813	-0.000107577	0.0041021	-0.00105371	0.00639651	0.00393189	-0.00176011	0.00837664	0.0526338	0.120885	0.181896	181895567400	1.9963	3.13	6.27158
9	-0.00123158	3.86854e-05	0.00142749	0.00188574	-0.00113309	0.00171152	0.000348462	-0.000108824	0.00078758	0.00031102	-0.00197003	0.000815793	0.00209174	0.0319306	0.0120742	0.0487756	0.0927804	9.27804e+10	2.10193	3.47	6.60343
10	0.0131525	-0.00274605	0.0158614	0.0207873	-0.00711824	-0.0020293	0.00114343	0.0231867	0.00694949	-0.00543567	-0.0115171	-0.00263041	0.00311865	0.10291	0.355719	0.172662	0.63129	631290060000	3.06956	7.40007	9.64332
11	0.00366119	0.0377251	-0.00173602	0.0379421	0	0	0	0	0	0	0	0	0	0	0	0	0		0.159577	0.02	0.501327
12	-0.00399993	0.0063398	0.0208131	0.0221219	0.00487996	-0.00181762	0.0171177	-0.00291151	-0.0014799	-0.0120103	-0.00176547	0.00443198	-0.00346659	0.238153	0.164018	0.0966404	0.498811	4.98811e+11	1.81595	2.59	5.70499
13	-0.00565307	-0.0232157	-0.000326037	0.0238962	5.91983e-05	0.0013055	0.00372884	0.00474702	-0.00306085	-0.00907155	0.000276438	0.00252228	0.00482	0.0509355	0.168794	0.0761872	0.295917	2.95917e+11	3.28589	8.4801	10.323
14	0.00248637	0.0014434	0.000431971	0.00290724	0.00340529	0.00662963	-0.000579587	-0.00585797	-0.00164798	0.00878544	-0.008086	-0.0101764	-0.00561266	0.106145	0.162914	0.238751	0.50781	5.0781e+11	3.7151	10.8401	11.6714
15	0.00050191	0.00894957	0.00440952	0.00998953	-0.00254927	0.00180325	0.000113057	0.0041312	-0.000756199	-8.79799e-05	-0.00156933	-0.000644111	-0.00119325	0.0446558	0.0497538	0.0340669	0.128476	128476494400	0.422201	0.14	1.32639
16	0	0	0	0	0	0	0	0	0	0	0	0	0	0	0	0	0		0.159577	0.02	0.501327
17	0.00991198	0.00972988	0.00504493	0.0147773	-0.00915322	-0.000242808	-0.00373044	0.00145344	-0.00949977	0.000687658	-0.0108119	-0.00102453	0.00848941	0.131265	0.116409	0.203258	0.450931	4.50931e+11	1.27661	1.28	4.01061
18	-0.00485613	0.00156199	-0.0160197	0.0168123	-0.000462807	-0.000430797	0.000702831	-0.000941447	0.00115302	1.28268e-05	0.000518301	0.000567525	0.000325333	0.0159644	0.021073	0.0141116	0.0511489	5.11489e+10	0.930485	0.68	2.92321
19	-0.000921687	0.00136719	-0.00030669	0.00167713	0.0145338	2.31713e-05	-0.0149764	0.000465893	0.00562038	0.0139101	-6.4845e-05	0.00689477	-0.00629458	0.295334	0.199963	0.132542	0.627839	627839307200	3.90234	11.9602	12.2596
20	-0.00466396	-0.0838747	-0.0339992	0.0906237	0.00024326	-0.00107124	-0.0013597	-0.00548491	-0.000456653	0.00331727	-0.00159338	-0.000838641	0.00301865	0.0267419	0.0925883	0.0545067	0.173837	173836954000	1.16174	1.06	3.64971
21	-0.00619482	0.0140088	0.0101732	0.0183879	0.000480495	-0.0037907	-0.00839183	-0.00226289	-0.00562298	0.00587565	-0.00221952	-0.000241139	0.000527162	0.12663	0.137615	0.0298782	0.294124	2.94124e+11	0.859348	0.58	2.69973
22	0.00317452	-0.00329544	-0.0142049	0.0149237	0.00341659	-0.00138467	-0.00110519	-0.0028836	-0.00238087	0.00429054	-0.0011254	5.46718e-05	0.00492535	0.0590646	0.0955502	0.0610541	0.215669	2.15669e+11	0.765304	0.46	2.40428
23	0.002479	-0.000194367	-3.97114e-05	0.00248692	-0.000801464	-0.00359515	0.018371	-0.00561665	-0.00972082	-0.00878952	0.00409449	0.00120517	0.00537	0.227676	0.24127	0.106697	0.575643	575642533000	4.6387	16.9003	14.5729
24	-0.0146058	0.0218886	0.00912017	0.0278499	-0.00493796	-0.00362646	-0.00432179	-7.86219e-05	-0.000750432	0.00392793	-0.00143613	-0.000878343	0.000412855	0.128862	0.0475699	0.0272733	0.203705	203705267000	0.575363	0.26	1.80756
25	-0.00208226	-0.00283072	-0.0026722	0.00441469	-0.00512005	0.00163625	-0.00669924	0.00338543	0.00460904	0.00245039	0.00168509	0.0046825	-0.00386734	0.134555	0.104449	0.102349	0.341353	341353190000	2.27362	4.06	7.1428
26	0.0287075	0.0105872	-0.0164291	0.0347293	0.0101231	0.0101636	-0.00179927	0.00231954	-0.000715361	0.00175001	0.0032122	-0.00947509	0.0024971	0.220859	0.0478491	0.151844	0.420552	4.20552e+11	0.789865	0.49	2.48144
27	-0.00458327	-0.00293199	-0.00981467	0.0112219	-7.1675e-05	-0.00138701	0.000640197	0.000661797	-0.00174706	-0.000531951	-0.00138261	0.00188614	0.00178161	0.0209888	0.0294081	0.0505037	0.100901	100900570100	0.529257	0.22	1.66271
28	-0.00187816	0.00051234	0.00185816	0.00269123	-0.0011438	-0.00175974	0.00319455	-0.00182784	0.00426553	-0.00121484	0.00114375	-0.00158152	0.00301615	0.0609809	0.0730822	0.0574142	0.191477	191477230000	1.48843	1.74	4.67606
29	-0.00490355	0.00303385	-0.000856293	0.00582944	0.0020626	0.00126193	0.00948019	-0.000388215	-0.000526506	0.00106463	0.000711799	0.00705683	0.00202562	0.128047	0.0197935	0.0979424	0.245783	245783090000	1.38197	1.5	4.34161
30	-0.00554321	-0.00195664	-0.000520818	0.00590143	-0.00284904	-0.00102448	-0.00241823	-0.00360907	-0.00254514	0.00150069	0.00294925	-0.000171476	0.00111497	0.0629175	0.0765489	0.042357	0.181823	181823392000	1.41385	1.57	4.44176
31	0.00178307	0.00322546	0.000935916	0.00380248	6.46427e-05	-0.0044063	-0.00182525	0.00188255	0.000108285	0.00214686	0.000671927	-0.00290718	0.000178783	0.0629619	0.0413769	0.0375789	0.141918	141917690700	2.39897	4.52001	7.53661
32	-0.000262799	0.0099388	0.000587421	0.00995961	-0.00282588	0.000472595	0.003887	-0.000317908	-0.00141075	-0.00127181	0.00129067	0.000913159	0.000242507	0.0718548	0.0300047	0.0244634	0.126323	126322879000	2.3669	4.40001	7.43585
33	0.00182464	-0.00635727	-0.0156815	0.0170192	-0.00318928	-0.00192417	0.000119952	0.00182322	0.00272658	0.00100615	0.00270996	0.00452184	-0.00115379	0.052334	0.0555595	0.0838558	0.191749	1.91749e+11	1.45819	1.67	4.58104
34	-0.00184512	-0.00150353	-0.00230156	0.00331092	-0.000456513	0.00647927	-0.00012676	0.00331254	0.00124599	0.000202859	-0.00151425	0.00126938	0.00426509	0.0706255	0.0476138	0.0704872	0.188726	188726436000	1.06451	0.889999	3.34427
35	0.000346389	-0.00662517	-0.00794421	0.01035	0.00250996	0.00294055	0.000190005	0.00138022	-0.00121817	0.00130263	-0.00128118	0.00057411	0.00111951	0.0564051	0.0390102	0.029748	0.125163	125163258000	1.40028	1.54	4.39913
36	-0.00910364	0.0163398	-8.43227e-05	0.0187049	0.00548249	-0.00815106	0.00496165	-0.00337822	0.00313279	0.00433216	0.015637	0.00886596	0.00149206	0.185952	0.108432	0.25995	0.554334	554333690000	0.95079	0.71	2.987
37	0.00360404	-0.0029245	0.00267481	0.0053569	-0.000562854	0.000857459	-0.00104818	0.00122267	-0.00120051	-0.000359723	-5.05394e-06	0.00220531	-0.000521166	0.0246849	0.0278291	0.0273154	0.0798293	79829332380	1.19416	1.12	3.75158
38	-0.0246853	-0.0183425	-0.0404358	0.0508022	0.00906546	0.00350059	-0.00298174	-0.00328335	0.00826755	-0.0113398	-0.00382867	0.00468935	-0.00815109	0.155478	0.228907	0.166691	0.551076	5.51076e+11	0.451352	0.16	1.41797
39	-0.000988656	0.00204241	0.00508099	0.00556465	0.00240859	-0.00125515	0.000173373	-0.00329529	-0.00126356	-0.00297648	-0.00225317	0.000123835	-0.00130329	0.0383711	0.0753532	0.0368029	0.150527	1.50527e+11	3.31102	8.6101	10.4019
40	0.000169591	0.000388854	0.00011133	0.000438592	-0.0251483	-0.0147174	0.000250942	0.00602382	-0.00666912	0.00038814	0.0135098	0.00552124	0.0157549	0.401166	0.130811	0.34786	0.879836	8.79836e+11	0.319154	0.08	1.00265
41	0.00284651	0.000132759	0.000704069	0.00293529	-0.00746111	0.00103036	0.00258286	0.000437394	0.00369618	-0.00101017	0.0015239	-0.00427468	-0.00534676	0.110743	0.0514375	0.111453	0.273634	273634147000	8.55052	57.4164	26.8623
42	0.0020593	-0.000671891	0.0020887	0.00300912	-0.00250506	0.00255342	0.00226598	0.000481524	0.000402207	0.000996701	-0.0113229	0.00327293	0.011722	0.0732446	0.0188043	0.263177	0.355226	355226318000	10.5677	87.7003	33.1995
43	0.000426037	0.000219419	0.00526042	0.00528221	-0.00435313	0.000842843	-0.00286374	0.00306274	-0.00292583	0.00391376	0.0062006	0.00285642	0.00511696	0.0805971	0.0990233	0.14174	0.32136	3.2136e+11	2.85461	6.40005	8.96806
44	-0.00692952	0.000652421	0.00163309	0.00714919	-0.000141283	-0.0122977	-0.000300189	0.00519321	0.00133685	-0.00144919	0.0118898	-0.0122541	-0.00993928	0.127391	0.0797925	0.340832	0.548016	5.48016e+11	5.30696	22.1204	16.6723
45	0.151114	-0.00894825	0.0515432	0.159913	-0.00468034	0.00134767	0.00101895	0.00149127	-0.00120498	0.00265963	-0.00438781	0.00228368	0.000794942	0.0704696	0.0535588	0.0746644	0.198693	198692753000	1.02179	0.819999	3.21006
46	0.00514838	-0.0127699	0.0111695	0.0177295	0.00321974	0.00184297	-0.00522369	-0.000964558	-0.000434591	-0.00383498	-0.00271512	0.00597921	0.00381839	0.102864	0.0523413	0.125127	0.280332	2.80332e+11	0.422201	0.14	1.32639
47	0.00669202	0.00319269	0.0053364	0.00913529	-0.0136969	-0.000649215	-0.0341518	0.0151746	-0.00165721	-0.00530603	0.0100955	0.0177349	-0.00500728	0.48498	0.221378	0.328376	1.03473	1.03473e+12	6.49279	33.1105	20.3977
48	0.000907265	0.000883814	0.00098914	0.00160706	0.000441297	0.000272749	0.00426734	-0.00653743	-0.00185247	-0.0109388	-0.00239618	-7.04641e-05	0.00286806	0.0498139	0.193288	0.053347	0.296448	2.96448e+11	3.15139	7.80008	9.9004
49	0.00345512	-0.00648941	0.00584159	0.00939013	-0.0588737	0.0350066	0.112533	-0.00881955	-0.0186672	-0.0401656	0.0343917	0.0475659	-0.0281698	2.06413	0.676524	1.10127	3.84193	3841931730000	0.504627	0.2	1.58533
50	-0.0514444	-0.03352	0.00216575	0.0614394	0.00993895	0.00417538	0.00433246	0.0136781	0.0322296	0.00930655	-0.00797491	0.00961102	-0.00559273	0.184468	0.552143	0.231787	0.968397	968397160000	0.356825	0.1	1.121
51	0.000785547	-0.00157025	-0.00193838	0.00261536	-0.00215214	9.4668e-05	0.000910421	-0.00287217	-0.00179774	-0.00108017	0.000278243	0.000684572	0.00153948	0.0315723	0.0575008	0.0250229	0.114096	1.14096e+11	1.53891	1.86	4.83463
52	0.0243719	0.000551583	0.000537828	0.024384	-0.00405612	0.000507403	-0.000227437	0.0061933	0.000866205	0.00412219	0.00275799	0.000727702	0.00346923	0.0479096	0.111817	0.0695492	0.229276	229275827000	1.12272	0.989999	3.52715
53	0.00202756	-0.00169037	0.00191708	0.00326244	0.000474641	-0.00452627	0.0115757	-0.00105007	0.000235269	-0.00427508	-0.00113687	-0.00202781	0.000652358	0.165766	0.0556042	0.0381703	0.259541	2.59541e+11	2.82095	6.25005	8.8623
54	-0.000915992	0.00345681	0.0016842	0.00395286	-0.000214264	-0.000398776	-0.000146817	-0.00596632	0.000751501	-0.00223359	-0.00015916	-0.00046845	-0.00114353	0.00759857	0.0895141	0.0177114	0.114824	1.14824e+11	0.338514	0.09	1.06347
55	0.000102405	-0.00101276	-0.00145809	0.00177826	-0.00358835	0.00224022	-0.000105446	0.00179482	-0.001005	-0.000252809	0.000331143	0.00114685	-0.000100493	0.0593402	0.0305263	0.0157848	0.105651	105651292000	3.05289	7.32007	9.59096
56	-0.00229877	-0.0011435	0.000942174	0.00273489	0.00209075	0.0026884	-0.00371137	0.00101545	0.000767852	0.0022762	-0.00150049	0.003331	0.000234225	0.0849051	0.0405951	0.0506571	0.176157	176157310000	1.35875	1.45	4.26865
57	0.0012403	-0.000520566	0.00141538	0.0019526	-0.010391	0.0126531	-0.0194525	-0.00235659	-0.00864356	0.00875208	0.00172544	0.0174901	0.0018666	0.424966	0.197522	0.210821	0.833309	833309190000	4.10432	13.2302	12.8941
58	-0.00230371	-0.000976907	0.00177131	0.00306577	-0.0112105	0.00677385	0.00338359	-0.000946147	-0.00628117	-0.00646737	0.0171305	-0.00373872	-0.0013842	0.21368	0.136947	0.222534	0.573161	573160610000	2.05291	3.31	6.44943
59	-0.00956718	-0.056698	-0.0960234	0.111923	-8.61702e-05	-0.00172898	0.000267227	-0.000960013	0.00555457	-0.00713607	0.00202836	0.00397133	-0.00304198	0.0208238	0.136507	0.0904167	0.247747	247746955900	1.11132	0.969999	3.49133
60	0.00455205	-0.00507506	-0.00470154	0.00828142	-1.24342e-05	0.00292565	0.000454821	-0.00304341	-0.000665307	0.000687114	0.00109002	0.00354204	-0.0026568	0.033929	0.0439583	0.0728887	0.150776	1.50776e+11	2.1734	3.71	6.82797
61	-0.000346696	0.000459884	-0.000687806	0.000897089	0.00661387	0.0035622	-0.00426225	-0.00482982	-0.00315237	-0.000356857	-0.000409401	-0.000495297	-0.00355509	0.144383	0.0833904	0.0445979	0.272371	2.72371e+11	8.82446	61.1657	27.7229
62	0.000882701	0.0276038	0.0325438	0.0426832	0.0004532	-0.0114993	0.000563671	0.00311093	0.00708615	0.00790923	-0.00701801	-0.00965548	-0.00169704	0.125162	0.181063	0.183705	0.48993	489930380000	0.821472	0.53	2.58074
63	0.000468694	0.00513578	0.0150863	0.0159434	-0.00268848	0.00176799	0.00284026	0.00100179	-0.000719756	-0.000985241	-0.00248512	0.00199547	0.00274683	0.0729672	0.0270679	0.0722742	0.172309	172309286000	1.48415	1.73	4.6626
64	0	0	0	0	-0.00429949	-0.00910707	0.00106332	0.00645007	0.00302917	-0.000854183	-0.00623298	-0.0166491	0.00320047	0.144699	0.103334	0.260825	0.508858	508858347000	0.276395	0.06	0.868323
65	0	0	0	0	0.00151346	0.00312635	-2.49976e-05	-0.00301166	-0.00152968	2.34301e-05	-0.001901	-0.00144652	-0.00155308	0.046648	0.0456477	0.049006	0.141302	1.41302e+11	0.517088	0.21	1.62448
66	0.00568177	-0.00448858	0.000375344	0.00725057	-0.00177573	0.00104523	-0.00195354	0.00170767	-0.00277521	-0.000936473	0.00278794	0.00159767	0.000829004	0.047745	0.0541935	0.0521462	0.154085	154084622000	1.24634	1.22	3.91549
67	-0.000745703	-0.000885441	0.0021859	0.00247351	0.00588729	-0.00243	0.00171509	-0.0040243	0.00663921	-0.00271159	-0.00210593	-0.00326381	-0.00274397	0.100324	0.133751	0.081137	0.315212	315211900000	1.65453	2.15	5.19787
68	-0.000580799	0.00207608	0.000888195	0.00233159	0.00271661	-0.00675299	0.00251618	0.00100621	0.00916006	0.00763762	-0.00945404	-0.00225496	-0.00210065	0.119858	0.178039	0.138096	0.435993	435993270000	6.19709	30.1606	19.4688
69	0.00202288	0.00194307	0.0175792	0.0178016	-0.000430383	-0.00203321	0.00101823	0.000311037	0.00278694	-0.00111598	-0.000174241	-0.000268968	0.000283238	0.0348182	0.0421396	0.00726447	0.0842223	84222254000	0.406843	0.13	1.27814
70	-6.108e-05	0.00041289	0.00398657	0.00400836	-0.00226811	0.00638814	0.000989512	-8.72902e-05	0.000138225	2.46111e-05	-0.00972173	-0.000353312	0.00352833	0.0964576	0.00250126	0.136034	0.234993	2.34993e+11	2.65589	5.54003	8.34373
71	-0.00169793	-0.00612969	-0.00161037	0.00656119	0.000238037	-0.00265475	0.00196946	-0.00234668	-0.000713687	-0.00225166	-9.06262e-05	-0.000576866	0.00129082	0.0486225	0.0531203	0.0195832	0.121326	121325930400	1.23092	1.19	3.86705
72	0.000358146	-0.00186258	0.00103696	0.00216166	0.000620413	-0.000636811	0.0123687	-1.20256e-05	-0.00100099	0.00269468	-0.000251999	0.00222788	-0.00948558	0.13626	0.0370769	0.119655	0.292991	2.92991e+11	6.42579	32.4306	20.1873
73	0.000783964	-0.0258589	0.0468547	0.0535225	-0.00233724	0.0035711	0.00132242	-0.0233804	0.0108692	-0.00817858	-0.00784331	-1.4966e-05	-0.00144957	0.0723077	0.424283	0.0930784	0.589669	5.89669e+11	1.98672	3.1	6.24146
74	0.00138319	0.00337761	-0.000971038	0.00377682	0.00510993	0.000919866	-0.000974359	-0.00381385	-0.0049161	0.00405893	-0.0032435	0.00223255	0.00244856	0.0700416	0.127889	0.079246	0.277176	2.77176e+11	1.35875	1.45	4.26865
75	-0.00953919	-0.00572411	-0.0109859	0.0156349	-0.00126121	0.00155588	-0.000933596	0.00660788	-0.0016696	-0.00189277	-0.00931467	0.00217779	-0.00131575	0.0375069	0.101703	0.128082	0.267292	267291555000	1.28655	1.3	4.04182
76	-0.000629917	-0.00272369	0.000451142	0.00283175	0.00714664	0.00998376	-0.0023276	0.00416622	-0.00287205	7.56285e-05	-0.00503691	0.00515733	0.00761512	0.19458	0.0711391	0.178094	0.443813	4.43813e+11	2.49779	4.90002	7.84706
77	-0.0092972	-0.000425387	-0.016663	0.019086	0.00700845	0.0146506	0.0404381	-0.00342358	-0.00879932	-0.00471823	0.00232095	0.00824333	-0.0343857	0.620972	0.169411	0.4495	1.23988	1239883100000	2.98972	7.02007	9.39249
78	0.00042566	0.00947427	0.00766179	0.012192	-0.0207382	-0.0200606	0.0154057	-0.0242949	0.0243621	0.00374479	-0.0356317	-0.0135729	0.0305139	0.562044	0.524018	0.797185	1.88325	1.88325e+12	2.86573	6.45005	9.00297
79	-0.00412417	0.00257474	0.0015801	0.00511222	0.00104718	-0.000873101	-0.000993656	0.000100338	-0.000208642	0.00385077	-0.00111734	0.00283741	-0.000215161	0.0291393	0.0415975	0.0416991	0.112436	1.12436e+11	1.63907	2.11	5.1493
80	-0.120582	-0.00404958	0.00678912	0.120841	-5.45274e-05	0.00151016	-0.00237056	-0.00196903	-0.00157912	-0.00113879	0.00150741	-0.00216593	-0.00174529	0.0393525	0.0468693	0.0541863	0.140408	140408163800	0.356825	0.1	1.121
81	-0.00219559	0.00177298	0.00349168	0.00448953	0.00563356	-0.00113974	-0.00644498	-0.00227119	-0.000956276	0.00284974	-0.00500297	0.000252893	0.00859554	0.132183	0.0607721	0.138514	0.331469	331468817000	2.2511	3.98	7.07206
82	0.000156962	-0.00142283	0.0016269	0.002167	-0.00164864	-0.000119477	-0.000908587	-0.000320816	0.000571323	0.00158494	-0.00234157	0.00305823	7.44361e-05	0.026767	0.0247707	0.0547424	0.10628	106280109800	3.48162	9.52012	10.9378
83	0.00529311	-0.000107763	0.00147376	0.0054955	0.000415268	-0.000472887	-0.000725702	-0.00791679	0.00179009	2.89642e-05	0.0127251	-0.000755953	-0.00414457	0.0161386	0.0973584	0.176256	0.289753	2.89753e+11	4.04643	12.8602	12.7123
84	0.00129411	0.00245016	0.00101227	0.00295003	-0.000665499	0.000733559	-0.00351652	-0.00181826	0.0020441	-0.00149103	-0.00156579	0.000669856	0.00199532	0.0491557	0.0535339	0.0423096	0.144999	1.44999e+11	1.7698	2.46	5.55999
85	-0.00157291	0.000146825	-0.00299924	0.00338984	0.00177586	0.00145584	0.00484842	-0.000191977	-0.00358997	0.00301526	0.00324392	0.000782125	-0.00637508	0.0808013	0.0679721	0.104011	0.252785	252784666000	1.23092	1.19	3.86705
86	-0.021714	-0.0106846	0.00780896	0.0254291	-0.00178036	-0.000988778	-0.000123412	-0.0107739	0.00388554	0.00648158	0.00368642	0.00430385	-0.00375164	0.0289255	0.21141	0.117419	0.357755	357754707000	3.11686	7.63008	9.79194
87	-0.00147803	-0.0102591	-0.000973151	0.0104107	-0.0259074	0.00431909	-0.0019833	0.0185119	0.0117494	-0.00315408	-0.00340522	-0.000517254	-0.0140771	0.322098	0.334155	0.179995	0.836248	836248326000	1.29641	1.32	4.07279
88	-0.0110535	-0.0160989	-0.024179	0.0310802	0.00155655	-0.00262728	-0.00374418	0.00302544	-0.00291117	-0.0022599	0.00126859	-9.98e-05	0.00139113	0.0792802	0.0819651	0.0275951	0.18884	1.8884e+11	1.20478	1.14	3.78494
89	-0.00475815	0.00149108	0.00287364	0.00575509	-0.00450385	0.000834106	-4.8951e-05	0.0022031	0.00177463	-0.00286197	0.00202275	0.0042463	-0.00202789	0.053869	0.068397	0.0829695	0.205235	205235488900	2.64628	5.50003	8.31356
90	0.000861477	0.0155604	0.0112795	0.0192379	-0.00238738	-0.0257447	-0.0330256	0.0220506	0.0215673	-0.000891059	0.0102968	-0.0294622	0.0136666	0.611576	0.44509	0.534257	1.59092	1.59092e+12	1.28655	1.3	4.04182
91	-0.00352286	0.00154727	0.000694286	0.00390981	-0.000575589	0.000847202	0.00335834	-0.00264016	0.00460712	0.00410302	-0.000162285	-0.000332957	-0.00440627	0.0478113	0.113503	0.0490151	0.210329	210329382000	1.72977	2.35	5.43424
92	-0.00369707	0.0114112	-0.00512915	0.0130457	0.00355373	-0.00321328	-0.000369526	0.000129453	0.000891639	0.000587665	-0.00429266	-0.00169855	-0.000174672	0.0713653	0.0160876	0.0616588	0.149112	149111691000	0.657953	0.34	2.06702
93	0.00263662	-0.00180318	-0.0176477	0.0179344	0.00189036	-0.0191036	-0.0218188	0.0117963	-0.00122856	-0.0162151	0.00164466	-0.00740576	-0.0231814	0.428127	0.2924	0.322318	1.04285	1042845510000	3.5683	10.0001	11.2102
94	-4.21501e-05	-0.000709389	-0.000769585	0.00104751	-0.0016927	-0.00106359	0.00132449	0.00082759	0.000180906	0.0030083	0.000656474	0.00286142	-0.000304524	0.0408078	0.0401679	0.0382242	0.1192	119199936000	3.60204	10.1901	11.3162
95	0.00149077	-0.006767	0.000469204	0.00694513	-0.00991306	-0.0211121	-0.021319	2.25619e-05	3.54743e-05	-0.0069567	-0.00184152	-0.000537179	-0.00676184	0.523441	0.0701474	0.0914054	0.684994	6.84994e+11	1.05248	0.87	3.30648
96	0.000130316	0.00172676	-0.00176751	0.00247443	-0.00862844	0.0023556	0.012509	0.00166919	-0.00208585	0.0084353	0.00577491	0.00890843	-0.00744792	0.23493	0.121903	0.221313	0.578146	5.78146e+11	5.79569	26.3805	18.2077
97	0.000112229	-0.00135213	0.00125932	0.00185114	-0.000493945	0.000944884	0.00127382	0.00015249	-0.000169735	0.000704229	0.000332308	-0.000669429	-0.000112864	0.0271265	0.0102645	0.011146	0.048537	48537008000	3.88765	11.8702	12.2134
98	-0.00196557	0.0458197	-0.00819243	0.0465878	-0.000364491	-0.00150203	-0.00111341	-0.00436672	-0.000250482	-0.000441573	0.00370837	-0.000183003	-0.000201205	0.0297992	0.0505878	0.0409258	0.121313	1.21313e+11	0.677027	0.36	2.12695
99	3.00953e-05	-0.020609	0.0238853	0.0315474	0.00020517	0.000770641	-0.000239746	0.00845964	0.00272707	0.00320369	-0.0181296	0.00437263	-0.000138178	0.0121556	0.143904	0.226404	0.382464	382463903000	2.0745	3.38	6.51726
100	-0.00121282	0.00625267	-8.66942e-05	0.0063698	-0.00845818	-0.00789741	-0.00332662	0.00853263	0.00401433	0.00587566	0.0257208	0.00408837	0.0221397	0.196822	0.184226	0.519489	0.900538	9.00538e+11	3.08814	7.49008	9.70169
101	0	0	0	0	0.0031807	0.000707059	-0.000137569	0.0033143	0.00197447	0.000794089	-0.00159852	-0.00626587	-0.00110681	0.0402533	0.0608287	0.089712	0.190794	1.90794e+11	4.93011	19.0903	15.4884
102	-0.00563849	0.00835759	0.00535352	0.011415	0.00182333	0.00596104	0.025815	-0.00133817	-0.00449208	-0.00974384	-0.00104319	-0.00896013	-0.021265	0.335993	0.155741	0.312683	0.804418	804417510000	1.70382	2.28	5.35271
103	0.00310718	0.0040573	-0.00310854	0.00598158	-0.00273307	0.00118828	0.00114052	0.000688283	-0.000195318	0.00873647	0.000122789	0.000922037	0.000649156	0.0506186	0.0962007	0.0169398	0.163759	163759163000	2.16754	3.69	6.80955
104	-0.00158006	-0.0023661	0.00099842	0.00301528	-0.00106829	0.00124469	0.00490311	-0.000453016	-0.0021967	0.000131123	0.00170161	0.000811508	-0.00034423	0.0721609	0.0278084	0.0285735	0.128543	1.28543e+11	1.28159	1.29	4.02625
105	0.00831721	0.000143631	-7.63302e-05	0.0083188	0.00109382	0.00145541	0.00139704	0.000594763	-0.00153192	0.000359602	0.000469353	0.000118704	0.000152506	0.0394627	0.0248628	0.00740564	0.0717311	71731137000	2.75475	5.96004	8.65433
106	-0.0038737	0.00440416	0.00576386	0.00822339	0.0016878	-0.000298593	0.00033004	0.000355901	-0.00105858	0.00248161	-0.00294592	-0.00301675	0.000955597	0.0231644	0.0389609	0.0691827	0.131308	1.31308e+11	1.82645	2.62	5.73796
107	-0.000110899	0.00116214	-0.00279775	0.00303155	0.00370475	0.00193302	0.000873972	0.00266979	-0.00200687	-0.000267871	-0.000478166	0.0016305	0.00287509	0.0651174	0.0494453	0.0498376	0.1644	164400237000	0.902703	0.64	2.83593
108	0.00185246	0.00672162	0.00590608	0.00913748	0.00602984	-0.00571556	-5.24943e-05	-0.0020792	0.00218996	0.00212787	-0.00248979	0.000195427	0.000302651	0.117979	0.0639702	0.0298787	0.211828	211827948000	1.32073	1.37	4.14922
109	0.023437	-0.0207907	-0.021116	0.0377813	0.00328187	-0.0191912	0.00625522	0.0282859	-0.00768207	0.00366596	0.0326062	-0.00437477	-0.00158383	0.287283	0.396339	0.385648	1.06927	1.06927e+12	2.2511	3.98	7.07206
110	-0.00173255	-0.00618334	0.000787943	0.00646964	0.0011322	-0.001101	0.000261681	0.000655634	-0.000379048	0.00166701	0.000566006	-0.00199675	-5.75448e-05	0.0249488	0.027017	0.0262031	0.0781688	78168822400	1.41835	1.58	4.45589
111	0.000719629	0.000125964	0.00211993	0.00224229	0.00643341	-0.00427324	0.000759768	-0.0022783	0.00182296	-0.00508712	-0.00313036	-0.00207615	-0.00166571	0.114664	0.0918838	0.0687222	0.27527	2.7527e+11	1.98992	3.11	6.25154
112	0.00146371	-0.0228647	0.00649961	0.0238156	-0.010617	0.00159068	0.0084744	-0.0102576	0.00428573	0.0128113	-0.00655505	0.00175609	0.00518209	0.206821	0.273546	0.134932	0.615299	615299370000	2.5879	5.26003	8.13014
113	-0.0167516	0.00204865	-0.0103563	0.0198006	-0.0194482	-0.0118243	-0.00552458	0.00426228	-0.00706526	0.00442692	-0.0297125	0.0119537	0.00810656	0.36797	0.157545	0.497728	1.02324	1023242770000	2.55823	5.14002	8.03692
114	0	0	0	0	-0.000501569	0.0016529	-0.00159871	0.00402518	-0.00140441	0.000472266	-0.00437453	-0.000982605	-0.00330921	0.0375318	0.0590186	0.0866634	0.183214	183213793000	0.225676	0.04	0.708983
115	0.0031835	-0.000901567	0.0014572	0.00361538	-0.000180616	0.00192308	0.000221434	0.00195671	0.00300085	0.00242952	-0.0026353	-0.00184826	-0.00175596	0.0232513	0.0738709	0.0623952	0.159517	159517464000	1.3159	1.36	4.13404
116	4.72521e-05	-0.000345897	0.00622516	0.00623495	3.69125e-05	0.000957977	0.00311302	0.0022218	-0.00131207	-0.000605559	0.00196805	-7.19333e-05	0.000770872	0.0410791	0.0413942	0.0281086	0.110582	110581876000	1.36809	1.47	4.29798
117	-0.00310068	0.0220962	-0.0292733	0.0368074	-0.00246842	0.0126719	0.00361554	-0.0206595	0.00369166	-0.010149	-0.00301202	0.00145297	-0.0249235	0.187559	0.345002	0.293885	0.826446	826445760000	1.45381	1.66	4.5673
118	0	0	0	0	0.0299294	0.0140587	-0.00490299	0.00898712	0.00517922	-0.0379367	-0.00987644	-0.0368868	0.0236672	0.48891	0.52103	0.704304	1.71425	1.71425e+12	0.356825	0.1	1.121
119	0.000846959	-0.000293076	-0.00198336	0.00217645	-0.000633303	-0.00365694	-0.00284808	0.00272942	0.00279516	-0.00231858	0.00228949	0.000479821	-7.92893e-05	0.0713832	0.0784317	0.028486	0.178301	178300886600	0.781764	0.48	2.45599
120	0.000837986	-1.20027e-05	0.0018629	0.00204273	-0.00105097	-0.000848584	-0.00128514	0.000324957	-0.00194118	0.000126513	-0.00499798	0.00179519	-0.000166044	0.0318469	0.0239265	0.0695921	0.125366	1.25366e+11	0.356825	0.1	1.121
121	0	0	0	0	0	0	0	0	0	0	0	0	0	0	0	0	0		0.252313	0.05	0.792667
122	0	0	0	0	0.00568243	0.0135929	-0.043642	0.00538839	-0.00319727	0.0279295	0.000947996	-0.00115558	0.00746791	0.629173	0.365152	0.0957148	1.09004	1090039966000	0.225676	0.04	0.708983

## Sheet: CMT16-8_SVI_0.07
																	Min	41877429600
	CMT-16-8_SVI 0.07 step size	One point per grain	Average	0.0252373													Average	3.27866e+11
	nb grains =	105	Median	0.00867058													Median	2.69304e+11
Grain	q13	q23	q33	rqtotal	ac11	ac12	ac13	ac21	ac22	ac23	ac31	ac32	ac33	rac1j	rac2j	rac3j	rac total	rac total	grain size	grain surface	grain perimeter
ID	(in mm-2)	(in mm-2)	(in mm-2)	(in mm-2)										(in mm-2)	(in mm-2)	(in mm-2)	(in mm-2)	(in m-2)	mm	mm2	mm
1	0.0198831	-0.0106716	-0.00954168	0.0245003	0.0189823	-0.00775503	-0.0184774	-0.00347351	-0.0022163	-0.0235013	-0.00362031	0.0279348	0.00529417	0.452147	0.291911	0.368493	1.11255	1.11255e+12	1.23127	1.1907	3.86817
2	0.0721466	-0.000387791	-0.00585476	0.0723848	0.00102374	0.00211326	-0.00319981	0.00124992	-0.00170663	0.00236684	0.000362158	-0.00107904	0.00269299	0.063368	0.0532339	0.0413418	0.157944	1.57944e+11	0.193477	0.0294	0.607826
3	-0.0113078	-0.00480586	-0.0198642	0.023357	0.0240902	0.00167894	-0.0154879	0.00443476	-0.00398006	-0.0103915	-0.00532359	0.00677966	0.00720385	0.412571	0.188063	0.193071	0.793705	793704970000	1.59153	1.98939	4.99996
4	-0.00013092	-2.38774e-05	0.00302418	0.0030271	0.000771933	-0.00190443	0.000281474	-0.00501035	-0.00950356	-0.00578017	-0.00522616	-0.00768782	-0.007417	0.0295784	0.202941	0.20331	0.435829	435828962000	5.79258	26.3521	18.198
5	0.000416937	0.00275863	0.00318185	0.00423179	-5.52816e-05	-0.00210514	0.000209553	-0.000219368	0.00052435	-0.000439184	0.00105591	-0.00147389	-0.00134733	0.0236997	0.011829	0.0387713	0.0743	7.43e+10	4.01825	12.6812	12.6237
6	0.00117852	-0.00475506	-0.00857183	0.00987298	0.00905765	0.00381166	-0.0167586	-0.0103888	-0.003589	0.0154572	-0.000317945	0.00552444	-0.00659132	0.296279	0.29435	0.124337	0.714966	7.14966e+11	0.425356	0.1421	1.3363
7	0	0	0	0	-0.0264482	-0.0162934	-0.0307521	-0.0256304	-0.0227723	-0.0182871	-0.0140584	-0.0398377	-0.0227149	0.734937	0.666898	0.76611	2.16795	2167946300000	0.249777	0.049	0.784701
8	-0.001003	-0.00106361	0.00373378	0.00400979	-0.00276419	0.00262591	0.00110541	-0.00315293	0.00256178	0.00616769	-0.00430009	0.000352083	-0.0138499	0.0649551	0.118824	0.18502	0.3688	368799500000	6.48967	33.0802	20.3879
9	-0.000415821	0.00451883	0.0126512	0.0134404	0.0115444	-0.00236804	0.00418776	0.0089818	-0.00621061	0.000690978	-0.0032794	-0.00111617	-0.00927743	0.181002	0.158834	0.13673	0.476565	4.76565e+11	3.28715	8.48677	10.3269
10	-0.00512269	0.00199191	-0.00515805	0.00753759	-0.00346085	-0.00414603	-0.00248362	-0.00405825	0.000421884	-0.00180112	0.0068484	0.00412044	0.00517523	0.100905	0.0628126	0.161441	0.325158	3.25158e+11	1.55184	1.89139	4.87526
11	-0.00175216	-0.00376033	-0.00162946	0.00445705	0.00162075	-0.00566914	-0.00345292	-0.0037139	0.00205458	-0.0011758	-0.00627017	-0.00181454	0.0049757	0.107428	0.0694427	0.130604	0.307475	307474920000	1.11144	0.970198	3.49169
12	-0.00618851	-0.0129055	0.0135771	0.0197278	0.00666612	-0.00106662	-0.00758007	0.004497	-0.00193778	-0.00377569	-0.00437202	0.00690885	0.00225981	0.153128	0.102105	0.135407	0.39064	3.9064e+11	0.886621	0.6174	2.78541
13	-0.00426792	0.00205765	0.000557083	0.00477068	0.00224067	-0.00114907	0.000300256	0.000602735	-0.000290901	0.000883048	-0.000528155	0.000880802	1.32504e-05	0.0368999	0.0177669	0.0142221	0.0688888	68888813200	1.97938	3.07719	6.21843
14	0.0179478	-0.00344362	0.02067	0.0275904	-0.000803445	0.00371799	0.000671584	0.00672662	-0.00435288	0.00329826	-0.0101556	-0.00410833	-0.00303074	0.0519302	0.143778	0.172946	0.368654	368654241000	0.693104	0.3773	2.17746
15	-0.00101624	0.000281519	0.00420017	0.00433053	0.00119134	0.00717949	-0.00119344	-0.00639331	-0.000935942	-0.00421741	0.0023912	0.00310526	-0.00354993	0.0956427	0.115467	0.0904639	0.301573	3.01573e+11	7.09738	39.5556	22.2971
16	-0.00175557	-0.00388268	0.00854974	0.00955276	-0.00298131	-0.000638156	0.00149871	-0.000163112	-0.000234469	0.000989514	-0.00360719	-0.000569972	0.00238294	0.0511817	0.0138709	0.065601	0.130654	130653724000	2.04147	3.27319	6.41347
17	-0.00151127	0.0143044	0.0120543	0.0187672	-3.26374e-05	-0.00163159	0.000995381	0.00665381	0.000620225	0.00496217	-0.00175648	-0.00827841	-0.0017602	0.026596	0.122362	0.117951	0.266909	2.66909e+11	0.749332	0.441	2.3541
18	-0.00047212	-0.00032548	0.00356827	0.00361406	-0.00283289	0.00117404	0.00097497	0.0013275	0.00205674	0.00254579	0.000310527	0.00201	-0.0031686	0.049819	0.0593002	0.0548913	0.16401	164010461000	1.66435	2.17559	5.22873
19	0.000617238	-0.00352355	0.00151839	0.00388612	-0.000555956	0.00247863	0.000375252	0.000884407	0.000372836	1.16324e-05	-0.000956832	0.00116929	0.00165774	0.0340984	0.0126888	0.0378387	0.0846258	84625817100	0.601544	0.2842	1.88981
20	-0.0134843	0.0084989	0.0109285	0.0193258	-0.00525636	-0.00584244	0.000207358	-0.000484819	-0.00578365	-0.00503614	-0.000257918	-0.00159884	0.00317887	0.113062	0.113046	0.0503563	0.276464	2.76464e+11	0.596335	0.2793	1.87345
21	-0.0145029	0.0147048	0.0207588	0.029283	-0.0190475	-0.00717158	-0.000774033	-0.0384939	0.000277441	-0.0334104	-0.000559153	0.0163104	-0.00508464	0.269931	0.721817	0.219542	1.21129	1.21129e+12	1.96199	3.02329	6.16377
22	0.01193	0.00287991	0.0324265	0.0346713	-0.000365566	-7.19268e-05	-0.000181327	0.000563061	-0.00118436	-0.00140987	0.00111394	0.00208295	0.00109273	0.0061882	0.0315729	0.0428961	0.0806572	80657247500	0.611827	0.294	1.92212
23	-0.0446329	0.0365449	0.00388491	0.0578162	-0.00189235	0.00291859	-0.00212135	0.00188792	-0.000789443	-0.000595425	-0.00104909	-0.00388773	0.000304284	0.0693229	0.0327278	0.052411	0.154462	1.54462e+11	0.740959	0.4312	2.3278
24	-0.00815591	-0.0270085	-0.00319949	0.028394	0.00112226	-0.00580118	-0.00456655	-0.00677236	-0.00564048	0.000144802	0.0110626	-0.00377166	-0.00425483	0.1149	0.125576	0.190891	0.431367	4.31367e+11	0.535713	0.2254	1.683
25	-0.000487163	0.000381215	0.000776873	0.000993069	-0.00306718	0.000933364	0.000129181	-0.00200737	0.0016887	-0.00150003	-0.000616814	0.000449395	-0.00112334	0.0412973	0.051961	0.0218955	0.115154	1.15154e+11	2.69135	5.68888	8.45513
26	0.0262605	-0.00140317	-0.00984433	0.0280802	-0.00950387	-0.000802259	-0.0119656	5.91142e-05	0.0055895	-0.00151805	-0.00379982	0.00947433	0.0118967	0.222717	0.0716666	0.251708	0.546092	5.46092e+11	0.832176	0.5439	2.61436
27	0.00869983	-0.00809736	0.000812196	0.0119128	0.00846228	0.00882469	-0.000468814	0.00849438	-0.00333126	-0.00322165	0.0063406	0.00242338	0.00530995	0.177558	0.150473	0.140739	0.46877	468770067000	0.547235	0.2352	1.71919
28	0.000133422	0.00750153	0.00828431	0.0111768	-0.0142076	0.00380165	0.0026016	-0.00430906	-0.00474714	0.00375153	-0.000697593	3.22542e-05	0.00703286	0.206108	0.128077	0.077627	0.411813	411812562400	2.15735	3.65539	6.77753
29	-0.00370202	-0.00482365	0.00222407	0.00647449	-0.00106108	-0.00407664	-0.00142772	-0.00141635	-0.00121876	0.000330973	-0.00135628	0.00167213	0.00252748	0.0656545	0.0296608	0.0555588	0.150874	150874089000	2.08532	3.41529	6.55123
30	-0.0146354	0.006303	-0.00704985	0.0174248	-9.02289e-05	0.00105916	-0.000421779	-0.000285277	-8.84008e-05	0.00921864	-0.00706423	0.00628001	0.00120811	0.0157117	0.0959231	0.145523	0.257158	2.57158e+11	1.27362	1.274	4.0012
31	0.00325423	-0.00430654	0.00442725	0.00698118	-0.00137445	0.000818468	0.00593187	0.00250907	-0.00148975	0.00421131	0.00127551	-0.00107008	-0.0015938	0.0812479	0.0821014	0.0393939	0.202743	202743154000	1.68669	2.23439	5.29891
32	-0.0552233	-0.0125653	0.00883867	0.0573203	-0.00149927	-0.00050899	0.0002042	0.000394888	-0.00053436	0.00284259	-0.00690212	0.00474726	-0.00154103	0.0221246	0.0377183	0.131904	0.191747	191746968000	0.28479	0.0637	0.894696
33	0.005054	0.00871149	-0.000339266	0.0100771	-0.000472317	-0.00446884	0.00539073	-0.00376928	-0.000487415	-0.00152168	-0.00025428	-0.000735592	0.00232255	0.103319	0.0577838	0.0331242	0.194227	194226835000	1.16622	1.0682	3.66379
34	0.0124382	0.0542476	-0.100742	0.115094	0.00173249	-0.00182402	-9.82573e-05	0.00238051	-7.05859e-05	0.000964242	-0.0033256	-0.00307775	3.28097e-05	0.0365476	0.0341534	0.0643615	0.135063	135062565400	1.28338	1.2936	4.03186
35	0.00057133	0.00602634	0.00620771	0.00867058	-0.00436552	0.00126127	0.00276912	0.000452568	-0.00161455	0.0038095	-0.00609491	0.00331595	0.00324697	0.0839591	0.0587662	0.126578	0.269304	2.69304e+11	0.805509	0.5096	2.53059
36	0.00941816	0.00204987	-0.00586818	0.0112845	0.00354924	-0.00555202	0.00153164	-0.00455218	-0.00447337	-0.00308424	-0.000533059	-0.00316372	0.00545778	0.106329	0.121098	0.0915456	0.318972	318972466000	0.820854	0.5292	2.57879
37	0.00104863	0.000961402	-0.00113716	0.00182128	-0.00722394	0.00264684	0.00336593	0.00754755	0.00085359	0.00307841	-0.00855136	-0.00301222	-0.000910348	0.132367	0.114796	0.124739	0.371902	371901894000	7.60643	45.4427	23.8964
38	-0.00107473	0.0015075	0.00395701	0.0043687	0.00205508	-0.000759919	-0.0042919	-0.00956576	0.00622561	0.00154537	-0.00723006	0.00517775	0.00436776	0.071069	0.173367	0.167756	0.412192	412191967000	4.56348	16.3561	14.3366
39	-0.00249034	0.00193952	0.00501774	0.005928	-0.000269122	-0.00127556	-0.000763039	-0.00301663	-8.18096e-05	0.00409719	-0.00131801	-0.00150757	0.000577396	0.0230772	0.0719564	0.0340297	0.129063	1.29063e+11	1.97938	3.07719	6.21843
40	-0.138829	0.0209528	-0.808778	0.820875	0.00736121	0.00295117	0.00378326	0.000593881	0.00215129	-0.00294449	0.0264677	0.0163793	0.00392744	0.140956	0.0568966	0.467744	0.665597	665597362000	0.176619	0.0245	0.554867
41	-0.00577628	0.000897783	0.00613066	0.00847091	-0.00016625	0.000228706	0.00729092	0.00308214	-0.00429084	0.00492304	0.00507714	0.000152369	1.75727e-06	0.0768588	0.12296	0.0523127	0.252132	2.52132e+11	1.5377	1.85709	4.83084
42	-0.00290894	-0.0269602	-0.00959863	0.0287654	-0.00294994	-0.00653342	0.00132584	-0.00392336	0.00443475	0.00127751	0.00112193	0.00254944	-0.00471051	0.108092	0.0963562	0.0838188	0.288267	2.88267e+11	1.03891	0.847699	3.26383
43	-0.00200404	-0.00306817	-0.000342119	0.00368061	0.00959899	-0.00254705	0.00103926	-0.00380542	-0.00613021	-0.000839512	-0.000155734	0.00143014	0.00656939	0.131853	0.107751	0.0815526	0.321157	3.21157e+11	2.03226	3.24379	6.38456
44	0.00405789	0.0099636	0.0222821	0.0247433	0.00592116	-0.00422564	-0.00688107	-0.00411154	-0.000238624	0.00305125	0.00868065	0.00188652	-0.00947791	0.170279	0.0740142	0.200451	0.444744	444743672000	0.517949	0.2107	1.62719
45	0.00136407	0.000409799	0.00327499	0.0035713	0.000328361	-0.00205087	-0.000667947	0.00195507	-1.29896e-05	-0.00018984	0.00181592	0.00290796	-0.00367701	0.0304717	0.021579	0.0840089	0.13606	136059626400	9.64107	73.0235	30.2884
46	0.000792772	-0.00032912	0.00230603	0.00246061	0.000212165	-0.00350832	0.000566654	0.00182832	0.00593022	-0.00112858	5.50285e-05	-0.00137623	-0.00147152	0.0428714	0.0888711	0.0290277	0.16077	1.6077e+11	5.90671	27.4056	18.5565
47	0.0125699	0.00210437	0.0198277	0.0235705	0.00220623	0.000596863	0.00497642	-0.00291151	0.0035314	0.00267751	0.00637818	0.00671669	0.00221005	0.0777951	0.0912042	0.153049	0.322048	322048446000	0.773907	0.4704	2.43131
48	0.0182684	0.0355381	-0.247159	0.250369	0.000250681	0.00139968	-0.000595127	0.000208947	-0.000598832	-9.70156e-05	0.000140212	0.000378282	-0.000518963	0.0224549	0.00904795	0.0103746	0.0418774	41877429600	0.208979	0.0343	0.656528
49	0	0	0	0	0.0044384	-0.00302282	-0.00142804	-0.00879693	-0.00289205	0.0037397	0.00298785	0.00228572	-0.00230116	0.0888927	0.154287	0.0757473	0.318927	318926810000	0.723923	0.4116	2.27428
50	-0.00244209	0.00237831	0.00140302	0.00368627	-0.00239932	0.000312167	-0.0015599	-0.00442652	-0.00219127	-0.00294619	-0.00231165	-0.00564847	0.00343142	0.0427139	0.0956398	0.113915	0.252269	2.52269e+11	1.17687	1.0878	3.69725
51	0	-0.00321649	0.00125185	0.00345151	-0.00400896	0.000908638	-0.0152304	-0.00266263	-0.00818322	0.0116443	-0.00308258	-0.000937136	0.00454461	0.20148	0.224901	0.0856433	0.512025	5.12025e+11	0.23696	0.0441	0.744433
52	0.000877425	-0.00352485	0.00319139	0.00483522	-0.00555426	0.000525195	-0.00295109	-6.78389e-05	0.00344726	-0.00293141	-0.000151463	-0.00229659	0.00248658	0.0903054	0.0644651	0.0493463	0.204117	2.04117e+11	0.858015	0.5782	2.69554
53	-0.00721174	0.00361085	-0.00153047	0.00820912	-0.00022717	0.00171976	0.000362324	-0.00146359	8.80372e-05	0.000930952	0.000190538	0.000464452	-0.00139038	0.0230925	0.0248258	0.0204537	0.068372	68372014200	2.80932	6.19848	8.82577
54	0.00897124	0.00305348	-0.00386798	0.0102356	0.0046737	-0.000333754	-0.00244657	-0.00210171	0.0014142	0.000985939	0.00118095	0.000297839	-0.00159775	0.0745402	0.0450185	0.0307653	0.150324	150324038000	0.65134	0.3332	2.04625
55	0.0635768	0.0283253	0.00862941	0.0701341	0.00195187	-0.00804616	0.00586455	0.00266868	0.00625736	0.0126246	0.00146308	0.00616122	0.0059667	0.158626	0.215506	0.13591	0.510042	5.10042e+11	0.85437	0.5733	2.68409
56	-0.00485345	0.00101471	-0.00247158	0.00554025	0.00282666	-0.00608704	0.00241858	0.00177857	0.000391306	4.06602e-05	0.000774266	0.00643336	-0.00127287	0.113323	0.0221054	0.084805	0.220233	220233148900	1.44569	1.64149	4.54176
57	0.00659814	0.00470599	-0.00530265	0.00968503	-0.00474538	-1.4334e-05	0.00118912	0.00750876	-0.00499675	0.00161207	-0.00962886	-0.0116834	0.00291435	0.0594883	0.141176	0.242266	0.44293	442930339900	1.56185	1.91589	4.90672
58	0.000982546	-0.00484342	-8.52807e-06	0.00494209	0.0008664	-0.00222558	-0.00040876	-0.0016276	0.000698778	0.000944461	-9.22048e-05	-0.00202888	0.000489912	0.0350074	0.0327084	0.0261099	0.0938257	93825724800	1.63599	2.10209	5.13962
59	-0.0010644	-0.00449939	-0.000644427	0.00466827	-0.000422134	-0.00180933	-0.000947081	0.000296188	0.000711812	-0.00049169	0.000145534	-0.000268895	0.0010897	0.0317854	0.0149969	0.0150413	0.0618236	6.18236e+10	5.35889	22.5546	16.8355
60	-0.00947996	0.00514353	0.00317863	0.0112441	-0.00278856	0.000112634	-0.00508344	-0.000347466	-0.00121724	-0.00102564	-0.00225656	0.00787448	0.000699622	0.0798464	0.0259034	0.108307	0.214056	214056441000	0.777927	0.4753	2.44394
61	0.0263158	0.00777303	0.00186197	0.0275029	-0.00484545	0.000444062	0.00688189	0.00257247	-0.00282685	0.0058125	0.00235366	0.00190133	0.00117184	0.121714	0.112118	0.0542683	0.288101	288100556000	0.702048	0.3871	2.20555
62	-0.00841854	-0.009449	-0.00434703	0.013381	0.00174433	0.00408015	0.00440473	0.0121903	0.00964129	-0.00129998	-0.00719929	-0.0042889	0.00110427	0.102292	0.231316	0.125925	0.459533	4.59533e+11	1.6379	2.10699	5.14561
63	-0.0693572	-0.00512677	0.00398921	0.0696607	0.00808859	-0.00328189	-0.000498207	-0.00222827	0.0197566	-0.00360398	-0.00225462	-0.00233109	-0.00729802	0.118687	0.255888	0.118837	0.493412	493412325000	0.417957	0.1372	1.31305
64	-0.00171317	0.000957365	-0.00422214	0.00465596	0.00190235	-0.00724659	-0.00219284	-0.00127382	-0.00166968	0.00430023	-0.00117392	0.000163849	-0.0085388	0.113418	0.0724373	0.0987656	0.284621	2.84621e+11	1.53364	1.84729	4.81807
65	0	0	0	0	-0.00276267	0.00179003	0.00197505	0.00854759	-0.00178551	0.000242014	0.00839547	0.000373012	0.00472166	0.0652775	0.105751	0.134901	0.30593	305930036000	0.473919	0.1764	1.48886
66	-0.000311778	-0.000462504	-0.000893169	0.00105303	-0.00290337	0.00160391	0.000484521	-0.00596705	0.0137014	0.00238824	4.03939e-05	0.00407119	0.00320146	0.049918	0.220567	0.0731305	0.343615	343615307100	4.06062	12.9506	12.7568
67	-0.00297061	-0.00212088	0.00349461	0.00505321	-0.00816666	0.00194798	0.00597986	5.34573e-06	0.00187324	3.6499e-05	0.00142884	0.00421564	-0.0032288	0.160945	0.0191508	0.0887328	0.268829	2.68829e+11	3.04487	7.28137	9.56576
68	-0.00261576	0.00192906	-0.00100831	0.00340297	-0.00127744	0.000528638	-0.00213399	0.000698148	-0.000523457	0.000368998	-0.00195973	-0.00182507	-0.00118002	0.0394006	0.015906	0.0496482	0.104955	1.04955e+11	2.83691	6.32097	8.91245
69	0.00358362	0.00619406	-0.0100427	0.0123315	-0.0131863	0.0110396	0.00496994	0.00849291	-0.0257634	-0.00136436	-0.00434429	0.00523154	0.00888914	0.291958	0.356207	0.18465	0.832815	832814540000	3.30326	8.57006	10.3775
70	0.00655621	-0.00661908	0.00703584	0.0116747	-0.000219353	-0.00248637	0.000841805	0.000389131	-0.000763368	-0.000110102	-0.00067106	-0.00232793	3.75835e-05	0.0354752	0.012626	0.0303657	0.0784669	7.84669e+10	1.39741	1.5337	4.3901
71	0.00319319	0.00212876	0.00658376	0.00762063	0.015103	0.00475249	0.00666963	-0.00536989	-0.0068895	0.0076337	0.00863203	0.00325412	0.0147115	0.265251	0.198931	0.265976	0.730158	730158050000	1.07723	0.911399	3.38423
72	0.00269489	-0.00430663	0.00778311	0.00929442	-0.00311879	0.000638599	0.00218882	-0.00186033	0.0037345	0.000583728	0.000378636	0.000925313	-0.000830285	0.0594621	0.0617856	0.0213423	0.14259	142590002000	2.17176	3.70439	6.82279
73	0.00884435	-0.00131778	-0.00976477	0.0132405	-0.00561608	-0.00011745	0.00141428	0.00167393	0.00356199	-0.00053717	-7.04591e-05	0.00426738	-0.00299559	0.0714781	0.0577309	0.0733343	0.202543	2.02543e+11	0.58578	0.2695	1.84028
74	-0.000420121	0.00166097	-0.00290457	0.00337222	0.00105986	0.00124138	0.00317362	8.80304e-05	0.00120893	-0.000641317	0.000721841	0.00163256	-0.000778867	0.0547486	0.0193828	0.0313327	0.105464	1.05464e+11	2.99316	7.03637	9.40332
75	-0.00163601	-0.0202729	0.00237235	0.0204767	-0.00467643	0.000294326	0.00451074	-0.000134463	-0.0013447	0.00404578	0.00191163	0.00164326	0.00398688	0.094815	0.0552495	0.0754177	0.225482	225482161000	1.35664	1.4455	4.26201
76	-0.00122359	-0.000115129	-0.00122083	0.0017323	0.00269756	-0.0034081	0.000702312	0.00474556	-0.00210576	-0.000220529	0.00886235	-0.0130121	0.00552002	0.0680797	0.0707185	0.273945	0.412743	4.12743e+11	1.76088	2.43529	5.53197
77	0.00311108	-0.0012402	0.00110977	0.00352824	0.00018928	0.0010522	-3.41167e-05	0.000267718	-3.72795e-05	-0.000912655	-0.00292184	-0.000519635	-0.00288797	0.012756	0.0121765	0.0632944	0.0882269	88226882300	1.44354	1.6366	4.53501
78	0.00412199	0.00209099	0.0183685	0.0189411	-0.0191648	-0.00891053	0.0248478	-0.00720496	-0.00597965	-0.00823074	0.0180341	-0.00227769	-0.01193	0.529231	0.214154	0.322419	1.0658	1065803270000	2.42812	4.63048	7.62817
79	0.00369332	-0.00312165	0.00336991	0.0058942	-0.000323642	0.00245005	0.000301558	0.000221643	0.000190155	0.00146949	0.000173806	-0.000380983	0.000864749	0.0307525	0.0188129	0.0141954	0.0637607	6.37607e+10	2.14139	3.60149	6.72738
80	-0.0034756	0.00440904	0.00214751	0.00601092	-0.0027135	-0.000146568	0.000316044	0.000224667	-0.00202384	7.88174e-05	0.00365842	0.00269809	0.00259867	0.0317611	0.0232733	0.0895518	0.144586	144586145600	2.13992	3.59659	6.72279
81	-0.000235824	0.00709591	0.00255454	0.00754541	0.00956719	-0.000613453	0.0122757	-0.00214221	0.00579733	0.000298662	-0.00300712	0.000298922	-0.00817559	0.224564	0.082382	0.114816	0.421762	4.21762e+11	2.20739	3.82689	6.93475
82	-0.0122435	0.0121302	-0.00461502	0.0178422	0.00183071	-0.0024882	-0.00437521	0.00214234	-0.00174785	-0.00229334	0.000451356	0.00230375	-0.0019149	0.0869412	0.0618354	0.0467001	0.195477	195476639000	0.467291	0.1715	1.46804
83	-0.00275555	0.00266958	0.00480049	0.00614528	-0.00748957	-0.000457807	-0.0142185	-0.00145656	-0.000492884	0.00205718	-0.00125576	0.00227992	-0.00125125	0.221659	0.0400663	0.0478693	0.309595	3.09595e+11	1.64361	2.12169	5.16357
84	-0.000422173	-0.000881988	0.0053979	0.00548575	-0.000223496	-0.00706357	0.0185597	0.00246334	-0.00364687	0.0104845	0.00254885	-0.000534369	-0.0103744	0.258467	0.165947	0.134577	0.558991	558990884000	5.65276	25.0977	17.7587
85	-0.00218831	-0.000932807	0.00165463	0.0028977	-0.00169948	0.000463686	-0.000685446	0.000536243	-0.00245965	0.00297477	-0.0020948	-0.00042259	0.00115849	0.0284862	0.0597067	0.0367588	0.124952	1.24952e+11	1.85071	2.69009	5.81418
86	0.0196831	0.0323738	-0.00815748	0.038756	-0.00488702	-0.0012431	-0.00415674	-0.00105074	-0.000513108	0.0112542	0.000502155	-0.00874098	0.000178176	0.102869	0.128181	0.0942132	0.325263	325262508000	1.01767	0.813399	3.19711
87	0.0143806	-0.00418763	0.0184045	0.023729	0.00267914	0.00277434	-0.00325034	0.00544354	-0.00122878	0.00392061	-0.00410884	0.00786556	0.00445281	0.0870382	0.105929	0.164272	0.35724	3.5724e+11	0.702048	0.3871	2.20555
88	-0.00696907	-0.0129221	-0.00658656	0.0160913	0.00122102	-0.00583952	0.00296799	-0.00695108	0.00337202	0.00148782	0.00273148	0.0014547	0.00428945	0.100285	0.118109	0.0847563	0.303151	303150860000	0.983374	0.759499	3.08937
89	0.00011366	-0.0364058	0.108088	0.114054	-0.000548876	0.00381213	-0.00122095	-0.000735776	0.000959901	-2.54021e-05	-0.000716936	0.00139231	0.00141341	0.0558195	0.0172108	0.0352265	0.108257	108256864600	0.781927	0.4802	2.4565
90	0.00327804	0.000270444	0.00139124	0.00357131	-0.000593744	0.00407604	0.00391787	-0.00096819	0.000785642	0.00396233	-0.00475063	-0.00288738	-0.00215864	0.0858765	0.0571616	0.0979665	0.241005	2.41005e+11	1.46285	1.6807	4.5957
91	0.000950834	-0.000529333	-0.0083721	0.00844253	0.0066005	0.00432325	0.00241881	0.00194784	-0.0031324	-0.00355576	0.00128336	-0.00791114	0.00369469	0.133426	0.08636	0.128892	0.348678	3.48678e+11	1.04489	0.857499	3.28263
92	-0.0037229	-0.000484453	-0.000378388	0.00377331	0.00181093	-0.00415541	0.00112706	-0.00862991	-0.00084096	0.00452397	-0.00117195	0.00679929	0.0320204	0.070934	0.139948	0.399916	0.610799	6.10799e+11	3.26811	8.38877	10.2671
93	0.01215	0.00696125	-0.0216704	0.0258009	0.00217365	0.00160805	0.000275367	-0.00150819	-0.00106054	0.000909939	4.30369e-06	-0.000160803	-0.00129441	0.0405706	0.0347867	0.0145952	0.0899525	8.99525e+10	1.0359	0.842799	3.25438
94	0	0	0	0	0.000512709	0.000925114	-0.00446347	0.00154191	0.0018884	0.00265494	-0.000377492	-0.00153493	0.000426405	0.059013	0.0608525	0.0233882	0.143254	143253696000	0.208979	0.0343	0.656528
95	-0.000534643	-0.0311126	0.00863927	0.0322942	-0.00257558	0.00395196	0.00255951	8.44744e-05	-0.0034696	-0.000805088	0.000682077	0.0033005	0.00375326	0.0908705	0.0435916	0.0773583	0.21182	211820496400	0.904043	0.6419	2.84014
96	-0.000332219	-0.000156042	0.000155748	0.000398718	-0.00429445	0.00627015	-0.0086329	0.00535655	-0.00271539	-0.009647	0.00466114	0.00499648	-0.0024315	0.191975	0.177189	0.120891	0.490056	4.90056e+11	3.0815	7.45777	9.68085
97	0.00095425	-0.0077078	0.0174411	0.0190922	-0.00107865	0.000457868	-0.0134431	-0.00326504	-0.00671699	0.00595001	0.000463345	0.00236514	0.00342097	0.149796	0.15932	0.0624945	0.371611	371610762000	1.43485	1.61699	4.50773
98	7.63654e-05	0.00156837	0.0114101	0.0115177	0.00377693	0.000221902	0.000598865	-0.000458357	-0.00166308	-0.000954372	-0.0121584	0.000174425	-0.00440386	0.045977	0.0307581	0.167367	0.244102	2.44102e+11	1.03288	0.837899	3.24491
99	-0.00734027	-0.00682039	-0.00018539	0.0100216	0.00950421	0.00873839	-0.00728054	0.00464374	-0.00160178	-0.00338909	-0.00492244	0.00189218	0.00863921	0.255231	0.0963461	0.154538	0.506116	5.06116e+11	0.820854	0.5292	2.57879
100	0.00818086	-0.00164474	-0.00241996	0.00868837	-0.00393217	-0.0026043	-0.00143166	0.001278	0.000955974	0.00115194	-0.00108067	-0.00123576	-0.000345943	0.0796812	0.0338592	0.0266237	0.140164	1.40164e+11	1.44569	1.64149	4.54176
101	-0.00319489	-0.000263521	0.00398488	0.0051143	0.00423225	0.00138293	-0.000903062	-0.00204449	-0.000716557	-0.00341352	-0.000704416	0.00114857	0.000658512	0.0651824	0.0617457	0.0251149	0.152043	152043075000	1.06851	0.896698	3.35683
102	-0.00903017	0.00108305	0.0067743	0.0113406	0.00306787	0.00262616	0.00264256	-0.000583078	-0.00517412	0.00209347	0.00713384	0.00638155	0.000419259	0.0833659	0.0785067	0.139347	0.301219	301219097000	1.20049	1.1319	3.77146
103	0.000158187	-0.00401227	-0.00137033	0.00424277	0.00327435	-0.00233996	0.00383001	0.00175359	-0.00287302	0.00103956	0.000188916	-0.000776024	-0.00207796	0.0944432	0.0566618	0.030429	0.181534	181534020000	0.983374	0.759499	3.08937
104	0.000653617	0.00215265	0.00441406	0.00495429	-0.000579882	0.00147397	0.0014093	0.00153367	0.0018139	-0.000903845	2.9358e-05	0.00333527	0.00100405	0.0346314	0.0425141	0.0436868	0.120832	120832319500	0.883095	0.6125	2.77433
105	0	0	0	0	-0.000536449	0.00722969	-0.000841291	-0.00374383	0.00074469	-0.000377284	-0.00160305	0.00203071	-0.00332809	0.0860743	0.0486581	0.0696185	0.204351	204350920000	0.157973	0.0196	0.496288

## Sheet: CMT16-8_SVI_0.1
																	Min	29314198200
	CMT-16-8_SVI 0.07 step size	One point per grain	Average	0.0176661													Average	2.29506e+11
	nb grains =	105	Median	0.00606941													Median	188512528000
Grain	q13	q23	q33	rqtotal	ac11	ac12	ac13	ac21	ac22	ac23	ac31	ac32	ac33	rac1j	rac2j	rac3j	rac total	rac total	grain size	grain surface	grain perimeter
ID	(in mm-2)	(in mm-2)	(in mm-2)	(in mm-2)										(in mm-2)	(in mm-2)	(in mm-2)	(in mm-2)	(in m-2)	mm	mm2	mm
1	0.0139182	-0.00747012	-0.00667917	0.0171502	0.0132876	-0.00542852	-0.0129342	-0.00243146	-0.00155141	-0.0164509	-0.00253421	0.0195544	0.00370592	0.316503	0.204338	0.257945	0.778786	778785530000	1.23127	1.1907	3.86817
2	0.0505026	-0.000271454	-0.00409833	0.0506693	0.000716617	0.00147928	-0.00223987	0.000874941	-0.00119465	0.00165679	0.000253511	-0.000755325	0.00188509	0.0443576	0.0372637	0.0289392	0.110561	110560608000	0.193477	0.0294	0.607826
3	-0.00791544	-0.0033641	-0.013905	0.0163499	0.0168631	0.00117526	-0.0108415	0.00310433	-0.00278604	-0.00727406	-0.00372651	0.00474576	0.00504269	0.288799	0.131644	0.13515	0.555593	5.55593e+11	1.59153	1.98939	4.99996
4	-9.16438e-05	-1.67144e-05	0.00211692	0.00211897	0.000540353	-0.0013331	0.000197032	-0.00350725	-0.00665251	-0.00404612	-0.00365832	-0.00538148	-0.00519188	0.0207049	0.142059	0.142317	0.30508	3.0508e+11	5.79258	26.3521	18.198
5	0.000291856	0.00193104	0.00222729	0.00296225	-3.86961e-05	-0.0014736	0.000146687	-0.000153556	0.000367045	-0.000307429	0.000739133	-0.00103172	-0.000943128	0.0165898	0.0082803	0.0271398	0.05201	5.201e+10	4.01825	12.6812	12.6237
6	0.000824965	-0.00332854	-0.00600028	0.00691109	0.00634036	0.00266816	-0.011731	-0.00727215	-0.0025123	0.01082	-0.000222561	0.00386711	-0.00461392	0.207395	0.206045	0.087036	0.500476	5.00476e+11	0.425356	0.1421	1.3363
7	0	0	0	0	-0.0185138	-0.0114053	-0.0215265	-0.0179413	-0.0159406	-0.012801	-0.00984091	-0.0278864	-0.0159004	0.514456	0.466829	0.536277	1.51756	1517562380000	0.249777	0.049	0.784701
8	-0.000702102	-0.00074453	0.00261365	0.00280685	-0.00193493	0.00183814	0.000773787	-0.00220705	0.00179325	0.00431738	-0.00301006	0.000246459	-0.00969493	0.0454686	0.0831768	0.129515	0.25816	258159888000	6.48967	33.0802	20.3879
9	-0.000291075	0.00316318	0.00885581	0.00940829	0.00808105	-0.00165763	0.00293143	0.00628726	-0.00434742	0.000483685	-0.00229558	-0.000781319	-0.0064942	0.126701	0.111184	0.095711	0.333596	333595780000	3.28715	8.48677	10.3269
10	-0.00358589	0.00139434	-0.00361064	0.00527631	-0.00242259	-0.00290222	-0.00173853	-0.00284077	0.000295319	-0.00126078	0.00479388	0.00288431	0.00362266	0.0706335	0.0439688	0.113008	0.227611	227610662000	1.55184	1.89139	4.87526
11	-0.00122651	-0.00263223	-0.00114062	0.00311993	0.00113452	-0.0039684	-0.00241704	-0.00259973	0.0014382	-0.000823057	-0.00438912	-0.00127017	0.00348299	0.0751996	0.0486099	0.0914229	0.215232	2.15232e+11	1.11144	0.970198	3.49169
12	-0.00433196	-0.00903385	0.00950394	0.0138095	0.00466629	-0.000746636	-0.00530605	0.0031479	-0.00135645	-0.00264298	-0.00306041	0.00483619	0.00158187	0.10719	0.0714733	0.0947847	0.273448	2.73448e+11	0.886621	0.6174	2.78541
13	-0.00298754	0.00144036	0.000389958	0.00333948	0.00156847	-0.000804347	0.000210179	0.000421915	-0.000203631	0.000618134	-0.000369709	0.000616561	9.27525e-06	0.0258299	0.0124368	0.00995545	0.0482222	4.82222e+10	1.97938	3.07719	6.21843
14	0.0125634	-0.00241053	0.014469	0.0193133	-0.000562412	0.00260259	0.000470109	0.00470864	-0.00304702	0.00230878	-0.00710891	-0.00287583	-0.00212152	0.0363511	0.100644	0.121063	0.258058	258058004000	0.693104	0.3773	2.17746
15	-0.000711371	0.000197063	0.00294012	0.00303137	0.00083394	0.00502563	-0.000835408	-0.00447533	-0.000655159	-0.00295219	0.00167384	0.00217368	-0.00248496	0.0669498	0.0808268	0.0633248	0.211101	211101361000	7.09738	39.5556	22.2971
16	-0.0012289	-0.00271787	0.00598482	0.00668694	-0.00208692	-0.000446708	0.0010491	-0.000114179	-0.000164128	0.00069266	-0.00252503	-0.00039898	0.00166806	0.0358272	0.00970967	0.0459207	0.0914576	91457602000	2.04147	3.27319	6.41347
17	-0.00105789	0.0100131	0.00843803	0.013137	-2.28457e-05	-0.00114211	0.000696766	0.00465766	0.000434157	0.00347352	-0.00122953	-0.00579488	-0.00123214	0.0186172	0.0856534	0.0825656	0.186836	186836221200	0.749332	0.441	2.3541
18	-0.000330484	-0.000227837	0.00249779	0.00252984	-0.00198302	0.000821828	0.000682479	0.000929249	0.00143972	0.00178205	0.000217369	0.001407	-0.00221802	0.0348733	0.0415102	0.0384239	0.114807	114807352000	1.66435	2.17559	5.22873
19	0.000432066	-0.00246649	0.00106288	0.00272028	-0.000389169	0.00173504	0.000262676	0.000619085	0.000260985	8.14329e-06	-0.000669783	0.000818505	0.00116042	0.0238689	0.00888213	0.0264871	0.0592381	59238068920	0.601544	0.2842	1.88981
20	-0.009439	0.00594923	0.00764992	0.0135281	-0.00367945	-0.00408971	0.000145151	-0.000339373	-0.00404855	-0.00352529	-0.000180543	-0.00111919	0.00222521	0.0791431	0.0791322	0.0352494	0.193525	193524694000	0.596335	0.2793	1.87345
21	-0.0101521	0.0102934	0.0145311	0.0204981	-0.0133333	-0.00502011	-0.000541824	-0.0269457	0.000194209	-0.0233873	-0.000391407	0.0114173	-0.00355925	0.188952	0.505272	0.15368	0.847904	8.47904e+11	1.96199	3.02329	6.16377
22	0.00835101	0.00201594	0.0226986	0.0242699	-0.000255896	-5.03487e-05	-0.000126929	0.000394143	-0.000829051	-0.000986911	0.000779756	0.00145806	0.000764911	0.00433173	0.0221011	0.0300273	0.0564601	56460079900	0.611827	0.294	1.92212
23	-0.031243	0.0255814	0.00271944	0.0404713	-0.00132464	0.00204301	-0.00148495	0.00132154	-0.00055261	-0.000416798	-0.000734362	-0.00272141	0.000212999	0.048526	0.0229095	0.0366877	0.108123	1.08123e+11	0.740959	0.4312	2.3278
24	-0.00570913	-0.018906	-0.00223964	0.0198758	0.000785585	-0.00406082	-0.00319658	-0.00474065	-0.00394834	0.000101361	0.0077438	-0.00264016	-0.00297838	0.0804299	0.0879035	0.133623	0.301957	301956868000	0.535713	0.2254	1.683
25	-0.000341014	0.000266851	0.000543811	0.000695148	-0.00214703	0.000653355	9.04268e-05	-0.00140516	0.00118209	-0.00105002	-0.00043177	0.000314576	-0.000786337	0.0289081	0.0363727	0.0153268	0.0806076	80607641700	2.69135	5.68888	8.45513
26	0.0183824	-0.000982217	-0.00689103	0.0196561	-0.00665271	-0.000561581	-0.00837592	4.13798e-05	0.00391265	-0.00106263	-0.00265987	0.00663203	0.00832766	0.155902	0.0501666	0.176196	0.382264	382264437500	0.832176	0.5439	2.61436
27	0.00608988	-0.00566815	0.000568537	0.00833893	0.0059236	0.00617728	-0.000328169	0.00594607	-0.00233188	-0.00225516	0.00443842	0.00169637	0.00371696	0.12429	0.105331	0.0985175	0.328139	3.28139e+11	0.547235	0.2352	1.71919
28	9.3395e-05	0.00525107	0.00579902	0.00782375	-0.0099453	0.00266115	0.00182112	-0.00301634	-0.003323	0.00262607	-0.000488315	2.25779e-05	0.004923	0.144276	0.0896541	0.0543389	0.288269	288268779300	2.15735	3.65539	6.77753
29	-0.00259142	-0.00337655	0.00155685	0.00453215	-0.000742759	-0.00285365	-0.000999407	-0.000991444	-0.00085313	0.000231681	-0.000949393	0.00117049	0.00176923	0.0459582	0.0207625	0.0388911	0.105612	105611847000	2.08532	3.41529	6.55123
30	-0.0102448	0.0044121	-0.0049349	0.0121974	-6.31603e-05	0.000741413	-0.000295245	-0.000199694	-6.18807e-05	0.00645305	-0.00494496	0.00439601	0.000845675	0.0109982	0.0671463	0.101866	0.180011	1.80011e+11	1.27362	1.274	4.0012
31	0.00227796	-0.00301457	0.00309908	0.00488682	-0.000962115	0.000572928	0.00415231	0.00175635	-0.00104283	0.00294792	0.000892858	-0.00074906	-0.00111566	0.0568735	0.057471	0.0275757	0.14192	141920212000	1.68669	2.23439	5.29891
32	-0.0386563	-0.00879571	0.00618707	0.0401242	-0.00104949	-0.000356293	0.00014294	0.000276422	-0.000374052	0.00198981	-0.00483148	0.00332308	-0.00107872	0.0154872	0.0264028	0.0923328	0.134223	1.34223e+11	0.28479	0.0637	0.894696
33	0.0035378	0.00609804	-0.000237487	0.00705398	-0.000330622	-0.00312819	0.00377351	-0.00263849	-0.000341191	-0.00106518	-0.000177996	-0.000514915	0.00162579	0.0723232	0.0404486	0.023187	0.135959	135958782000	1.16622	1.0682	3.66379
34	0.00870671	0.0379733	-0.0705197	0.0805655	0.00121274	-0.00127681	-6.87802e-05	0.00166636	-4.94101e-05	0.000674969	-0.00232792	-0.00215442	2.29665e-05	0.0255833	0.0239074	0.0450531	0.0945438	94543807500	1.28338	1.2936	4.03186
35	0.000399931	0.00421844	0.0043454	0.00606941	-0.00305586	0.000882889	0.00193838	0.000316798	-0.00113018	0.00266665	-0.00426644	0.00232116	0.00227288	0.0587714	0.0411364	0.0886048	0.188513	188512528000	0.805509	0.5096	2.53059
36	0.00659271	0.0014349	-0.00410772	0.00789913	0.00248447	-0.00388641	0.00107215	-0.00318652	-0.00313136	-0.00215897	-0.000373141	-0.0022146	0.00382045	0.0744303	0.0847685	0.0640819	0.223281	2.23281e+11	0.820854	0.5292	2.57879
37	0.00073404	0.000672981	-0.000796012	0.00127489	-0.00505675	0.00185279	0.00235615	0.00528328	0.000597512	0.00215489	-0.00598595	-0.00210856	-0.000637245	0.0926569	0.0803568	0.0873175	0.260331	2.60331e+11	7.60643	45.4427	23.8964
38	-0.000752313	0.00105525	0.0027699	0.00305809	0.00143856	-0.000531945	-0.00300433	-0.00669603	0.00435792	0.00108176	-0.00506104	0.00362442	0.00305743	0.0497483	0.121357	0.117429	0.288534	2.88534e+11	4.56348	16.3561	14.3366
39	-0.00174324	0.00135766	0.00351242	0.0041496	-0.000188386	-0.000892889	-0.000534127	-0.00211164	-5.72668e-05	0.00286804	-0.000922604	-0.0010553	0.000404177	0.016154	0.0503694	0.0238208	0.0903443	9.03443e+10	1.97938	3.07719	6.21843
40	-0.0971806	0.0146669	-0.566145	0.574612	0.00515284	0.00206581	0.00264828	0.000415717	0.0015059	-0.00206114	0.0185274	0.0114655	0.00274921	0.0986694	0.0398276	0.327421	0.465918	465918053000	0.176619	0.0245	0.554867
41	-0.00404339	0.000628448	0.00429146	0.00592964	-0.000116375	0.000160095	0.00510364	0.0021575	-0.00300359	0.00344612	0.003554	0.000106658	1.23009e-06	0.0538011	0.0860721	0.0366189	0.176492	176492079890	1.5377	1.85709	4.83084
42	-0.00203626	-0.0188721	-0.00671904	0.0201358	-0.00206496	-0.00457339	0.000928091	-0.00274635	0.00310433	0.000894257	0.000785352	0.00178461	-0.00329736	0.0756644	0.0674494	0.0586731	0.201787	201786894000	1.03891	0.847699	3.26383
43	-0.00140283	-0.00214772	-0.000239484	0.00257643	0.00671929	-0.00178293	0.000727485	-0.0026638	-0.00429114	-0.000587659	-0.000109014	0.0010011	0.00459858	0.0922971	0.075426	0.0570869	0.22481	224809943000	2.03226	3.24379	6.38456
44	0.00284052	0.00697452	0.0155975	0.0173203	0.00414481	-0.00295795	-0.00481675	-0.00287808	-0.000167037	0.00213588	0.00607646	0.00132057	-0.00663454	0.119195	0.0518099	0.140316	0.311321	311320531000	0.517949	0.2107	1.62719
45	0.000954846	0.00028686	0.00229249	0.00249991	0.000229852	-0.00143561	-0.000467562	0.00136855	-9.0929e-06	-0.000132888	0.00127114	0.00203557	-0.00257391	0.0213302	0.0151053	0.0588063	0.0952418	95241813980	9.64107	73.0235	30.2884
46	0.000554941	-0.000230384	0.00161422	0.00172243	0.000148515	-0.00245582	0.000396655	0.00127982	0.00415115	-0.000790001	3.85204e-05	-0.000963358	-0.00103006	0.0300099	0.0622097	0.0203194	0.112539	112539023600	5.90671	27.4056	18.5565
47	0.00879894	0.00147306	0.0138794	0.0164994	0.00154436	0.000417804	0.00348349	-0.00203805	0.00247198	0.00187426	0.00446473	0.00470168	0.00154704	0.0544566	0.0638429	0.107134	0.225434	225433922000	0.773907	0.4704	2.43131
48	0.0127879	0.0248766	-0.173012	0.175258	0.000175476	0.000979777	-0.000416589	0.000146263	-0.000419183	-6.79109e-05	9.81487e-05	0.000264798	-0.000363274	0.0157184	0.00633356	0.0072622	0.0293142	29314198200	0.208979	0.0343	0.656528
49	0	0	0	0	0.00310688	-0.00211598	-0.000999629	-0.00615785	-0.00202444	0.00261779	0.00209149	0.00160001	-0.00161081	0.0622249	0.108001	0.0530231	0.223249	2.23249e+11	0.723923	0.4116	2.27428
50	-0.00170946	0.00166481	0.000982117	0.00258039	-0.00167953	0.000218517	-0.00109193	-0.00309856	-0.00153389	-0.00206234	-0.00161816	-0.00395393	0.00240199	0.0298997	0.0669479	0.0797408	0.176588	176588371000	1.17687	1.0878	3.69725
51	0	-0.00225154	0.000876297	0.00241606	-0.00280627	0.000636046	-0.0106613	-0.00186384	-0.00572825	0.00815098	-0.00215781	-0.000655995	0.00318123	0.141036	0.157431	0.0599503	0.358417	358417293000	0.23696	0.0441	0.744433
52	0.000614198	-0.0024674	0.00223397	0.00338466	-0.00388798	0.000367636	-0.00206576	-4.74873e-05	0.00241308	-0.00205199	-0.000106024	-0.00160761	0.0017406	0.0632138	0.0451256	0.0345424	0.142882	142881754200	0.858015	0.5782	2.69554
53	-0.00504821	0.0025276	-0.00107133	0.00574639	-0.000159019	0.00120383	0.000253627	-0.00102451	6.16265e-05	0.000651668	0.000133376	0.000325117	-0.000973266	0.0161648	0.0173781	0.0143176	0.0478604	4.78604e+10	2.80932	6.19848	8.82577
54	0.00627987	0.00213743	-0.00270759	0.00716494	0.00327159	-0.000233628	-0.0017126	-0.0014712	0.000989941	0.000690157	0.000826663	0.000208487	-0.00111842	0.0521781	0.0315129	0.0215357	0.105227	105226830000	0.65134	0.3332	2.04625
55	0.0445038	0.0198277	0.00604059	0.0490939	0.00136631	-0.00563231	0.00410518	0.00186808	0.00438015	0.00883719	0.00102415	0.00431285	0.00417669	0.111038	0.150854	0.095137	0.357029	357029200000	0.85437	0.5733	2.68409
56	-0.00339742	0.000710294	-0.00173011	0.00387817	0.00197866	-0.00426093	0.00169301	0.001245	0.000273914	2.84623e-05	0.000541985	0.00450335	-0.00089101	0.079326	0.0154738	0.0593635	0.154163	154163203700	1.44569	1.64149	4.54176
57	0.0046187	0.00329419	-0.00371185	0.00677952	-0.00332176	-1.00344e-05	0.000832385	0.00525613	-0.00349772	0.00112845	-0.0067402	-0.00817839	0.00204004	0.0416418	0.098823	0.169586	0.310051	310051261900	1.56185	1.91589	4.90672
58	0.000687782	-0.0033904	-5.96979e-06	0.00345946	0.00060648	-0.0015579	-0.000286133	-0.00113932	0.000489145	0.000661123	-6.4543e-05	-0.00142022	0.000342938	0.0245052	0.0228959	0.018277	0.065678	65678002500	1.63599	2.10209	5.13962
59	-0.000745081	-0.00314957	-0.000451099	0.00326779	-0.000295494	-0.00126653	-0.000662956	0.000207331	0.000498266	-0.000344184	0.000101874	-0.000188227	0.000762791	0.0222498	0.0104978	0.0105289	0.0432765	43276502000	5.35889	22.5546	16.8355
60	-0.00663597	0.00360047	0.00222504	0.00787085	-0.00195199	7.88442e-05	-0.00355841	-0.000243226	-0.000852066	-0.000717946	-0.00157959	0.00551214	0.000489735	0.0558925	0.0181324	0.0758146	0.149839	149839484500	0.777927	0.4753	2.44394
61	0.0184211	0.00544112	0.00130338	0.019252	-0.00339182	0.000310843	0.00481732	0.00180073	-0.0019788	0.00406875	0.00164756	0.00133093	0.000820287	0.0851998	0.0784827	0.0379878	0.20167	2.0167e+11	0.702048	0.3871	2.20555
62	-0.00589297	-0.0066143	-0.00304292	0.00936672	0.00122103	0.00285611	0.00308331	0.00853322	0.00674891	-0.000909989	-0.0050395	-0.00300223	0.000772991	0.0716045	0.161921	0.0881473	0.321673	321672920000	1.6379	2.10699	5.14561
63	-0.04855	-0.00358874	0.00279245	0.0487625	0.00566202	-0.00229732	-0.000348744	-0.00155978	0.0138296	-0.00252278	-0.00157823	-0.00163176	-0.00510861	0.0830808	0.179122	0.0831861	0.345389	345388672000	0.417957	0.1372	1.31305
64	-0.00119922	0.000670155	-0.00295549	0.00325917	0.00133165	-0.00507261	-0.00153498	-0.000891677	-0.00116878	0.00301016	-0.000821743	0.000114694	-0.00597716	0.0793924	0.0507061	0.0691359	0.199235	199234503000	1.53364	1.84729	4.81807
65	0	0	0	0	-0.00193387	0.00125302	0.00138254	0.00598331	-0.00124986	0.000169409	0.00587683	0.000261109	0.00330516	0.0456942	0.0740258	0.094431	0.214151	214151011000	0.473919	0.1764	1.48886
66	-0.000218245	-0.000323753	-0.000625218	0.000737119	-0.00203236	0.00112274	0.000339166	-0.00417694	0.00959098	0.00167177	2.82779e-05	0.00284983	0.00224103	0.0349426	0.154397	0.0511914	0.240531	240530954700	4.06062	12.9506	12.7568
67	-0.00207943	-0.00148462	0.00244623	0.00353725	-0.00571666	0.00136358	0.0041859	3.74208e-06	0.00131127	2.5549e-05	0.00100019	0.00295094	-0.00226016	0.112661	0.0134056	0.0621129	0.18818	1.8818e+11	3.04487	7.28137	9.56576
68	-0.00183103	0.00135034	-0.000705819	0.00238208	-0.000894206	0.000370046	-0.00149379	0.000488703	-0.00036642	0.000258299	-0.00137181	-0.00127755	-0.000826014	0.0275804	0.0111342	0.0347537	0.0734683	73468335000	2.83691	6.32097	8.91245
69	0.00250853	0.00433584	-0.0070299	0.00863201	-0.00923042	0.00772769	0.00347896	0.00594503	-0.0180344	-0.000955051	-0.003041	0.00366207	0.0062224	0.204371	0.249345	0.129255	0.58297	582970089000	3.30326	8.57006	10.3775
70	0.00458935	-0.00463335	0.00492509	0.00817231	-0.000153547	-0.00174046	0.000589263	0.000272391	-0.000534357	-7.70713e-05	-0.000469742	-0.00162955	2.63086e-05	0.0248327	0.0088382	0.021256	0.0549269	54926875300	1.39741	1.5337	4.3901
71	0.00223523	0.00149013	0.00460863	0.00533444	0.0105721	0.00332674	0.00466874	-0.00375893	-0.00482266	0.00534359	0.00604242	0.00227788	0.010298	0.185676	0.139252	0.186183	0.511111	511110690000	1.07723	0.911399	3.38423
72	0.00188642	-0.00301464	0.00544818	0.0065061	-0.00218315	0.000447019	0.00153217	-0.00130223	0.00261415	0.000408609	0.000265046	0.000647719	-0.0005812	0.0416235	0.0432499	0.0149396	0.099813	9.9813e+10	2.17176	3.70439	6.82279
73	0.00619105	-0.000922448	-0.00683534	0.00926832	-0.00393126	-8.22147e-05	0.000989993	0.00117175	0.0024934	-0.000376019	-4.93215e-05	0.00298716	-0.00209691	0.0500346	0.0404116	0.051334	0.14178	1.4178e+11	0.58578	0.2695	1.84028
74	-0.000294085	0.00116268	-0.0020332	0.00236055	0.000741903	0.000868963	0.00222153	6.16213e-05	0.000846253	-0.000448922	0.000505289	0.00114279	-0.000545207	0.038324	0.013568	0.0219329	0.0738248	73824829700	2.99316	7.03637	9.40332
75	-0.00114521	-0.014191	0.00166065	0.0143337	-0.0032735	0.000206028	0.00315752	-9.41245e-05	-0.000941291	0.00283205	0.00133814	0.00115028	0.00279082	0.0663705	0.0386746	0.0527924	0.157838	1.57838e+11	1.35664	1.4455	4.26201
76	-0.000856515	-8.05901e-05	-0.000854582	0.00121261	0.00188829	-0.00238567	0.000491618	0.00332189	-0.00147403	-0.000154371	0.00620364	-0.00910849	0.00386402	0.0476558	0.049503	0.191761	0.28892	288920236000	1.76088	2.43529	5.53197
77	0.00217775	-0.000868142	0.00077684	0.00246977	0.000132496	0.000736541	-2.38817e-05	0.000187403	-2.60956e-05	-0.000638858	-0.00204528	-0.000363745	-0.00202158	0.00892919	0.00852356	0.0443061	0.0617588	6.17588e+10	1.44354	1.6366	4.53501
78	0.00288539	0.0014637	0.012858	0.0132588	-0.0134153	-0.00623737	0.0173934	-0.00504348	-0.00418576	-0.00576151	0.0126239	-0.00159438	-0.00835101	0.370462	0.149907	0.225693	0.746062	7.46062e+11	2.42812	4.63048	7.62817
79	0.00258533	-0.00218515	0.00235894	0.00412594	-0.000226549	0.00171503	0.000211092	0.000155151	0.000133109	0.00102864	0.000121664	-0.000266688	0.000605324	0.0215267	0.013169	0.00993676	0.0446325	44632523000	2.14139	3.60149	6.72738
80	-0.00243292	0.00308632	0.00150326	0.00420764	-0.00189945	-0.000102597	0.000221231	0.000157267	-0.00141669	5.51722e-05	0.0025609	0.00188866	0.00181907	0.0222328	0.0162913	0.0626862	0.10121	101210314300	2.13992	3.59659	6.72279
81	-0.000165077	0.00496714	0.00178818	0.00528179	0.00669703	-0.000429417	0.00859303	-0.00149954	0.00405814	0.000209063	-0.00210499	0.000209245	-0.00572291	0.157195	0.0576674	0.0803714	0.295234	2.95234e+11	2.20739	3.82689	6.93475
82	-0.00857048	0.00849112	-0.00323051	0.0124895	0.0012815	-0.00174174	-0.00306265	0.00149964	-0.0012235	-0.00160534	0.000315949	0.00161262	-0.00134043	0.0608588	0.0432848	0.03269	0.136834	136833649000	0.467291	0.1715	1.46804
83	-0.00192889	0.00186871	0.00336034	0.00430169	-0.0052427	-0.000320465	-0.00995296	-0.0010196	-0.000345019	0.00144002	-0.000879033	0.00159594	-0.000875874	0.155161	0.0280464	0.0335085	0.216716	216716157000	1.64361	2.12169	5.16357
84	-0.000295521	-0.000617392	0.00377853	0.00384003	-0.000156446	-0.00494451	0.0129918	0.00172434	-0.00255281	0.00733915	0.00178419	-0.000374058	-0.00726209	0.180927	0.116163	0.0942034	0.391294	3.91294e+11	5.65276	25.0977	17.7587
85	-0.00153182	-0.000652965	0.00115824	0.00202839	-0.00118964	0.00032458	-0.000479812	0.00037537	-0.00172176	0.00208234	-0.00146636	-0.000295813	0.00081094	0.0199403	0.0417947	0.0257312	0.0874662	87466159000	1.85071	2.69009	5.81418
86	0.0137781	0.0226616	-0.00571023	0.0271292	-0.00342092	-0.000870171	-0.00290972	-0.000735517	-0.000359176	0.00787795	0.000351508	-0.00611869	0.000124723	0.0720081	0.0897264	0.0659492	0.227684	2.27684e+11	1.01767	0.813399	3.19711
87	0.0100664	-0.00293134	0.0128831	0.0166103	0.0018754	0.00194203	-0.00227524	0.00381048	-0.000860148	0.00274442	-0.00287619	0.00550589	0.00311697	0.0609267	0.0741505	0.11499	0.250068	250067728000	0.702048	0.3871	2.20555
88	-0.00487835	-0.00904544	-0.00461059	0.0112639	0.000854718	-0.00408766	0.00207759	-0.00486575	0.00236042	0.00104148	0.00191204	0.00101829	0.00300261	0.0701997	0.0826764	0.0593294	0.212206	2.12206e+11	0.983374	0.759499	3.08937
89	7.95619e-05	-0.0254841	0.0756613	0.0798378	-0.000384213	0.00266849	-0.000854665	-0.000515043	0.000671931	-1.77814e-05	-0.000501855	0.000974615	0.000989388	0.0390737	0.0120476	0.0246586	0.0757798	75779811300	0.781927	0.4802	2.4565
90	0.00229463	0.000189311	0.00097387	0.00249992	-0.000415621	0.00285323	0.00274251	-0.000677733	0.00054995	0.00277363	-0.00332544	-0.00202117	-0.00151105	0.0601136	0.0400132	0.0685766	0.168703	168703304000	1.46285	1.6807	4.5957
91	0.000665584	-0.000370532	-0.00586047	0.00590977	0.00462035	0.00302628	0.00169317	0.00136349	-0.00219268	-0.00248903	0.000898353	-0.0055378	0.00258628	0.093398	0.060452	0.0902244	0.244074	244074372000	1.04489	0.857499	3.28263
92	-0.00260603	-0.000339118	-0.000264872	0.00264132	0.00126765	-0.00290879	0.000788938	-0.00604093	-0.000588671	0.00316678	-0.000820362	0.0047595	0.0224143	0.0496538	0.0979639	0.279942	0.427559	427559411000	3.26811	8.38877	10.2671
93	0.008505	0.00487287	-0.0151693	0.0180606	0.00152155	0.00112563	0.000192757	-0.00105573	-0.00074238	0.000636958	3.01236e-06	-0.000112562	-0.000906088	0.0283994	0.0243507	0.0102166	0.0629667	6.29667e+10	1.0359	0.842799	3.25438
94	0	0	0	0	0.000358896	0.000647579	-0.00312443	0.00107933	0.00132188	0.00185846	-0.000264244	-0.00107445	0.000298484	0.0413091	0.0425967	0.0163718	0.100278	100277572000	0.208979	0.0343	0.656528
95	-0.00037425	-0.0217788	0.00604749	0.022606	-0.00180291	0.00276637	0.00179166	5.91321e-05	-0.00242872	-0.000563562	0.000477454	0.00231035	0.00262728	0.0636094	0.0305141	0.0541508	0.148274	148274366100	0.904043	0.6419	2.84014
96	-0.000232553	-0.000109229	0.000109024	0.000279103	-0.00300612	0.0043891	-0.00604302	0.00374959	-0.00190077	-0.00675289	0.0032628	0.00349753	-0.00170205	0.134382	0.124032	0.0846238	0.343039	343038760000	3.0815	7.45777	9.68085
97	0.000667976	-0.00539546	0.0122088	0.0133645	-0.000755054	0.000320508	-0.00941015	-0.00228553	-0.00470189	0.00416501	0.000324342	0.0016556	0.00239468	0.104857	0.111524	0.0437462	0.260128	2.60128e+11	1.43485	1.61699	4.50773
98	5.34558e-05	0.00109786	0.0079871	0.00806238	0.00264385	0.000155331	0.000419206	-0.00032085	-0.00116416	-0.00066806	-0.0085109	0.000122097	-0.0030827	0.0321839	0.0215307	0.117157	0.170872	170871538000	1.03288	0.837899	3.24491
99	-0.00513819	-0.00477427	-0.000129773	0.00701509	0.00665295	0.00611688	-0.00509638	0.00325062	-0.00112125	-0.00237236	-0.00344571	0.00132453	0.00604744	0.178662	0.0674422	0.108177	0.354281	354281120000	0.820854	0.5292	2.57879
100	0.0057266	-0.00115131	-0.00169397	0.00608186	-0.00275252	-0.00182301	-0.00100216	0.000894602	0.000669181	0.000806357	-0.00075647	-0.00086503	-0.00024216	0.0557769	0.0237014	0.0186366	0.0981149	98114861000	1.44569	1.64149	4.54176
101	-0.00223642	-0.000184465	0.00278942	0.00358001	0.00296257	0.000968054	-0.000632144	-0.00143115	-0.00050159	-0.00238946	-0.000493091	0.000803997	0.000460958	0.0456277	0.043222	0.0175805	0.10643	106430162000	1.06851	0.896698	3.35683
102	-0.00632112	0.000758133	0.00474201	0.00793839	0.00214751	0.00183831	0.00184979	-0.000408155	-0.00362188	0.00146543	0.00499369	0.00446709	0.000293482	0.0583561	0.0549547	0.0975426	0.210853	2.10853e+11	1.20049	1.1319	3.77146
103	0.000110731	-0.00280859	-0.000959232	0.00296994	0.00229205	-0.00163797	0.00268101	0.00122752	-0.00201112	0.000727689	0.000132241	-0.000543217	-0.00145457	0.0661103	0.0396632	0.0213003	0.127074	1.27074e+11	0.983374	0.759499	3.08937
104	0.000457532	0.00150685	0.00308984	0.003468	-0.000405917	0.00103178	0.000986507	0.00107357	0.00126973	-0.000632692	2.05503e-05	0.00233469	0.000702836	0.024242	0.0297599	0.0305807	0.0845826	84582596500	0.883095	0.6125	2.77433
105	0	0	0	0	-0.000375514	0.00506078	-0.000588903	-0.00262068	0.000521283	-0.000264099	-0.00112214	0.0014215	-0.00232966	0.060252	0.0340607	0.048733	0.143046	143045651000	0.157973	0.0196	0.496288

## Sheet: CMT16-9_SII 
																	Min	9.44718e+09
	CMT16-9_SII	One point per grain	Average	0.0224766													Average	3.57811e+11
	nb grains =	315	Median	0.00753767													Median	222772892000
Grain	q13	q23	q33	rqtotal	ac11	ac12	ac13	ac21	ac22	ac23	ac31	ac32	ac33	rac1j	rac2j	rac3j	rac total	rac total	grain size	grain surface	grain perimeter
ID	(in mm-2)	(in mm-2)	(in mm-2)	(in mm-2)										(in mm-2)	(in mm-2)	(in mm-2)	(in mm-2)	(in m-2)	mm	mm2	mm
1	0.00262659	0.00112446	0.000697918	0.00294117	-0.0077406	-0.00238424	0.000204641	-0.0042349	-0.00282995	-0.00712064	0.00100802	-0.00101851	0.00128304	0.103295	0.141855	0.0330957	0.278245	278245479000	4.67832	17.1903	14.6974
2	-0.00058861	0.00131666	0.00229831	0.00271335	-0.00159764	-0.000174257	0.000569485	-0.000504192	0.000484994	0.000494471	0.000674919	0.000673719	0.00147745	0.0234138	0.0148366	0.0282609	0.0665113	6.65113e+10	1.98992	3.11	6.25154
3	-0.00507984	-0.00486588	-0.0109015	0.012974	-0.0158556	-0.0487127	-0.00486375	0.00562287	-0.000798313	-0.0213403	-0.00124163	-0.0412193	-0.0286242	0.694321	0.277615	0.710852	1.68279	1682786864000	1.34462	1.42	4.22426
4	-0.000145662	-0.00100554	-0.00761422	0.00768171	-0.0012546	0.00671565	0.00171751	-0.00134748	0.00230464	0.00171834	-0.000901415	0.00490262	0.00203454	0.0968775	0.0537045	0.0783858	0.228968	2.28968e+11	2.14095	3.6	6.726
5	0.00015573	-0.000240792	0.00183386	0.00185615	-0.0156617	-0.00170528	0.00483426	0.000841981	-0.00169963	-0.00903859	0.0140882	0.00877717	-0.00304869	0.222013	0.115802	0.25914	0.596955	596955020000	6.34589	31.6306	19.9363
6	0.0224561	0.0351819	0.0302239	0.0515318	-0.0103325	0.00208279	-0.00249485	-0.0146686	0.00237466	-0.00322045	0.0114019	-0.00299274	0.00313661	0.149101	0.202637	0.175312	0.52705	5.2705e+11	0.276395	0.06	0.868323
7	0.000536365	0.0018114	-0.000294549	0.00191197	0.00437011	0.00458506	0.00493815	-0.00658117	0.00106997	0.00704485	0.00310334	-0.00317433	0.00110345	0.138933	0.14696	0.0738112	0.359704	359704400000	5.16345	20.9404	16.2215
8	-0.00664978	-0.0244953	0.00404676	0.0257025	-0.00211156	0.000303923	0.000874136	-0.00187317	0.00195487	-2.98082e-05	-0.00252569	0.000868947	0.00129012	0.0328962	0.0385785	0.0468476	0.118322	1.18322e+11	1.07641	0.909999	3.38164
9	-0.00122307	0.00181615	-0.00104992	0.0024283	0.00123973	-0.00311744	0.00465368	0.000804012	0.00573632	0.00105021	0.0130217	-0.00395998	-0.000192596	0.0901085	0.0759053	0.171743	0.337757	337756775000	5.94318	27.7405	18.6711
10	-0.00524688	-0.00297591	-0.00583406	0.00839178	0.00855452	-0.0192239	0.0110843	0.0108489	0.00022533	-0.00791185	0.00746296	0.00289874	0.00562329	0.388628	0.189861	0.15985	0.738339	738338663000	1.00925	0.799999	3.17067
11	0.0115377	-0.110771	-0.0888701	0.142482	0	0	0	0	0	0	0	0	0	0	0	0	0		0.159577	0.02	0.501327
12	-0.00465994	0.00267263	-0.00509163	0.00740153	0.00244472	0.00171817	-0.00153497	-0.00132548	0.00101127	0.00140203	0.00358006	-0.000607129	-0.00215736	0.0569785	0.0373878	0.0634456	0.157812	157811853000	1.51388	1.8	4.75601
13	6.14594e-05	0.000848623	-0.000277255	0.000894879	-0.0194748	0.00371574	-0.0295568	-0.00224551	-0.00151588	-0.00270308	-0.00869	-0.00459378	-0.0110628	0.527474	0.0646447	0.243465	0.835584	835583910000	1.55536	1.9	4.88632
14	-0.000609674	-0.00116154	-0.00137996	0.00190399	-0.0127817	0.00350668	0.0133366	0.0076647	-0.00167598	0.00661433	0.00815841	-0.000654011	-0.0062422	0.296249	0.15955	0.150546	0.606346	606345737000	7.65981	46.0783	24.0641
15	-0.555821	0.0372373	0.0123947	0.557204	-0.0428776	-0.0194082	-0.00666328	0.00279508	0.000144854	-0.0313865	-0.0132222	-0.00441933	-0.00537333	0.689491	0.343265	0.230149	1.2629	1262903970000	0.319154	0.08	1.00265
16	0.00213147	-0.00696259	0.00070427	0.00731552	-0.000617184	-0.000898127	0.00400868	0.000921255	0.000287709	-0.00322676	-0.000721801	-0.000127119	-0.000154302	0.0552399	0.0443573	0.0100322	0.109629	1.09629e+11	1.35405	1.44	4.2539
17	-0.00227081	-0.00835279	0.0142322	0.0166577	-0.00323435	0.00150229	0.00291693	0.004213	0.00214673	-0.0078636	-0.00156105	0.00214393	0.000347033	0.0765357	0.142233	0.0405201	0.259289	259289198000	1.39573	1.53	4.38481
18	-2.82706e-05	-0.00381763	0.00483864	0.0061634	-0.000390823	-0.000626908	-0.000335977	0.000839875	0.000942333	-0.00086839	0.00071839	0.00104453	-0.000714838	0.0135371	0.026506	0.0247776	0.0648207	6.48207e+10	1.35405	1.44	4.2539
19	0.00684001	-0.00212829	0.00368755	0.00805689	0.00387595	-0.00356975	-0.000564157	-0.0025968	0.00139639	0.000809765	-0.0003385	-0.000458394	0.00066418	0.0800986	0.0480296	0.0146107	0.142739	142738890000	2.91858	6.69006	9.169
20	-0.000571199	-0.0107225	0.0350042	0.0366141	-0.00173889	-0.00792374	-0.00862569	-0.000635412	0.00173275	-0.00483248	-0.00174308	0.00151893	0.0129823	0.182883	0.0720064	0.162443	0.417333	417332908000	0.923618	0.67	2.90164
21	0.0108974	-0.0028851	-3.67681e-05	0.0112729	0.0127665	0.00519589	0.00296872	0.00299599	0.00554867	-0.0161059	0.00885238	0.011557	-0.00641165	0.209311	0.246506	0.26821	0.724027	724026890000	4.69192	17.2903	14.7401
22	-0.00543128	-0.00144561	0.00302198	0.0063813	0.00299405	0.000611252	-0.000440738	0.00139068	-0.00133649	-0.000664693	0.000822807	-0.00222099	-0.00242964	0.0404604	0.0339187	0.0547344	0.129113	1.29113e+11	1.46689	1.69	4.60838
23	0.00299152	0.00144009	-0.000896952	0.00343912	0.00123756	0.00154571	-1.46849e-05	0.00317521	-0.0041504	-0.00933372	-0.000111518	0.00420044	0.00366656	0.0279795	0.166593	0.0797851	0.274358	274357906900	0.829186	0.54	2.60497
24	0.00190285	-0.00340628	0.00139994	0.00414528	-0.00568202	-0.000612245	-0.00124321	0.00490937	0.00104889	-0.00574382	0.000496504	0.00135778	-0.000754299	0.0753748	0.117021	0.0260858	0.218481	2.18481e+11	0.597082	0.28	1.87579
25	-0.00500245	0.000523425	0.00203159	0.00542456	0.00224468	0.000287783	0.000832071	-0.000372827	-0.000658192	-0.000742102	0.000513028	-0.00146732	0.00103939	0.0336454	0.0177312	0.0301974	0.081574	81573966000	0.765304	0.46	2.40428
26	0.00110804	0.00290701	0.00196143	0.00367773	0.00174322	-0.000777762	0.00395838	-0.000657694	-0.000215687	0.000296475	0.000441593	0.00132309	-0.000763181	0.0647936	0.0116986	0.0252786	0.101771	101770803000	1.71499	2.31	5.38781
27	-0.000664147	-0.00126401	0.000223302	0.00144523	0.00435143	0.0016973	-0.00615845	6.26948e-05	9.6008e-05	-0.000789775	0.00255995	0.00157525	-0.00361975	0.122072	0.00948478	0.0775494	0.209106	209105909900	6.52022	33.3904	20.4839
28	-0.0010031	0.0065604	0.000554377	0.00665976	-6.60799e-05	0.00827216	-0.0110045	-0.0125969	-0.00668935	0.0055228	0.00206093	-0.0143572	-0.00647861	0.193427	0.24809	0.228968	0.670485	670485448900	5.65648	25.1305	17.7704
29	-0.00844118	0.00669236	-0.000921243	0.0108116	0.00766878	0.00672664	0.00449725	0.0125459	0.00543888	0.00883322	-0.00642852	0.022098	0.0128971	0.188927	0.26818	0.414237	0.871344	8.71344e+11	1.12272	0.989999	3.52715
30	-0.0360622	0.0163472	-0.0195559	0.0441604	0.00371811	0.00128505	-0.00264885	0.00107776	0.00218996	0.00125102	-0.00115999	0.0038292	-0.00248516	0.0765201	0.0451873	0.0747435	0.196451	196450980000	1.38197	1.5	4.34161
31	0.00575688	-0.0015869	-0.00546357	0.00809386	0.000266224	-0.0089098	-0.000156983	0.00474015	-0.00284417	-0.00456157	-0.00236399	0.00403922	0.00385645	0.0933301	0.121459	0.102597	0.317386	3.17386e+11	0.923618	0.67	2.90164
32	6.1679e-05	-0.00271918	0.000913507	0.00286919	0.00513673	0.00696622	-0.00404475	0.00444966	0.00501346	0.0100002	0.00217884	0.004453	0.00308865	0.161477	0.194633	0.0972048	0.453315	453315270000	2.21405	3.85	6.95565
33	-0.0176504	0.0292968	-0.000161396	0.0342033	0.00029099	-0.000906611	0.00344224	0.00237792	0.0127029	0.00463418	-0.00360964	0.00386369	0.00108933	0.0463984	0.19715	0.0856266	0.329175	329174945000	0.957461	0.72	3.00796
34	0.000427704	-0.000455347	0.00110231	0.00126703	0.000690249	-0.00250205	-0.00320674	-0.00547001	0.0025341	0.00511205	-0.00501577	0.00452755	0.0154138	0.0639904	0.131162	0.249571	0.444723	4.44723e+11	12.7247	127.169	39.9759
35	0	0	0	0	0.00319663	0.00103333	0.000824932	-0.00458874	-0.00313987	0.00174001	0.00171921	0.000170804	-0.00327819	0.0505489	0.0946862	0.0516821	0.196917	1.96917e+11	0.422201	0.14	1.32639
36	-0.000363863	-0.00232705	-0.00401351	0.00465358	-0.00364041	-0.00405639	0.00761362	0.0024803	0.00179991	-0.00107207	-0.00229884	-0.00144418	0.00815671	0.153104	0.0535228	0.118997	0.325624	325624300000	0.944069	0.7	2.96589
37	0.00381022	-0.00253381	-0.004514	0.00642761	0.00144075	3.41793e-06	-0.0020409	0.000506289	-0.00250305	0.000360867	-0.00222279	0.000721387	-0.000405552	0.0348507	0.033702	0.0334973	0.10205	102050055320	0.983697	0.76	3.09038
38	0.00701451	-0.00472491	0.014854	0.017093	0.00150571	0.00020945	-3.72508e-05	0.00114888	0.000288688	0.00144637	0.000162679	0.00196478	-0.000610202	0.0175241	0.0288394	0.0273766	0.0737401	7.37401e+10	1.44943	1.65	4.55353
39	0.00113602	-0.00747336	-0.00030467	0.00756535	-0.011237	-0.00639418	-0.00178679	-0.00392733	-0.000547321	0.00488048	0.000603183	0.00159577	-0.00153934	0.19418	0.0935513	0.037383	0.325114	3.25114e+11	2.89005	6.56006	9.07937
40	0.00188452	-0.00377746	-0.000792081	0.00429512	0.00236705	0.00195702	0.00339925	-0.000397359	-0.00104321	-0.000957538	-0.001229	-0.000169195	-0.00131482	0.0772332	0.0239811	0.0271302	0.128344	1.28344e+11	1.22573	1.18	3.85076
41	0.0146781	-0.00759769	0.019956	0.0259117	0.00185384	-0.00130241	0.000539581	0.00215198	-0.00180022	-0.000719627	-0.000990372	0.000355377	-0.00143317	0.0369583	0.0467183	0.0277891	0.111466	111465744000	0.937302	0.69	2.94463
42	-0.00435257	0.0115695	-0.0539654	0.0553631	0.000306123	0.00277451	6.27328e-05	-0.000961852	-0.0026764	-0.000844311	0.00403352	0.00313418	0.000254834	0.0314337	0.0448256	0.0742253	0.150485	150484691700	1.37736	1.49	4.32713
43	0.00357863	-0.000798909	0.0012915	0.00388752	-0.000635341	0.000440647	-0.00088054	-0.000611076	0.00238093	-0.000249108	-0.00108103	-0.000736962	-0.00168632	0.0195653	0.0324112	0.0350431	0.0870195	8.70195e+10	1.25143	1.23	3.93151
44	0.00423139	0.00191941	0.0115669	0.0124652	0.00152994	0.000232056	0.0049247	0.000690701	0.00254343	-0.00181806	0.000571022	0.000390805	-0.00234301	0.066867	0.0505218	0.0330483	0.150437	1.50437e+11	1.64682	2.13	5.17364
45	-0.00408056	-0.000328918	0.00150872	0.00436296	0.000530896	-0.00561529	0.00110984	-0.0115319	-0.00774274	0.00328329	-0.0130615	0.0109655	-0.00780367	0.0725603	0.225579	0.318306	0.616446	6.16446e+11	2.73386	5.87004	8.58869
46	-0.00316553	0.012585	-0.0212717	0.0249176	7.88375e-05	0.0019392	0.000348438	-0.0040044	0.000246938	0.00669228	-0.00443679	0.00379025	0.00261639	0.0236647	0.109436	0.108434	0.241535	2.41535e+11	1.05248	0.87	3.30648
47	-0.0352467	0.0433044	0.0130153	0.0573323	0.00602901	0.00397838	-0.00874954	-0.00246334	-0.000390331	-0.00195654	-0.00194157	0.00108957	0.00295721	0.187569	0.0481021	0.0598836	0.295555	295555079000	0.648205	0.33	2.0364
48	-0.0011858	0.00357074	0.000292753	0.00377386	0.000125407	0.00336871	-0.00513807	0.00223609	-0.00420392	-0.00389032	0.000919754	-0.00141443	-0.00213797	0.0863219	0.103303	0.0447215	0.234347	234346748000	0.748482	0.44	2.35143
49	0.00604382	-0.0206509	-0.0180267	0.0280704	0.0023959	-0.00235334	0.00153226	-0.00230814	-0.00111218	0.000115153	0.00531273	-0.00740296	-0.00473195	0.062815	0.0353547	0.174476	0.272646	2.72646e+11	1.5676	1.93	4.92476
50	0.00330116	-0.00196346	-0.00113941	0.00400638	0.00673137	-0.0132264	-0.00869631	0.000157204	-0.00429278	-0.0099999	0.0043209	0.0028728	0.00605268	0.286541	0.144499	0.132464	0.563504	563503506000	3.81153	11.4102	11.9743
51	0.0017765	-0.0273697	0.0321693	0.0422744	0.000173202	-0.000777449	0.000737127	0.00189492	-0.000363343	0.00145329	0.00288016	-0.00113277	0.0032286	0.0168778	0.0371155	0.0724152	0.126409	126408522000	1.0823	0.919999	3.40017
52	0.00446171	0.0974771	-0.00982798	0.0980728	-0.000139592	-0.000962708	0.000459713	-0.00177982	0.000625129	0.000373432	-0.00080145	0.00192934	-0.000281997	0.0156201	0.0277838	0.0301279	0.0735318	73531793000	1.13401	1.01	3.5626
53	-0.0022927	-0.00885582	0.00357394	0.00982115	0.000356358	0.00188715	0.00102118	-0.00258705	-0.0006652	-0.00144741	-0.00236409	0.00596668	-0.000269084	0.032647	0.0469967	0.0859985	0.165642	1.65642e+11	0.628255	0.31	1.97373
54	0.0014986	-0.00180743	-0.000872949	0.00250492	0.00148821	0.00564281	0.00315066	-0.00132748	-0.00343601	-0.00103855	0.00290283	0.000981581	-0.000180151	0.102817	0.0580203	0.0406456	0.201483	201482791000	1.13401	1.01	3.5626
55	-0.0107143	-0.000186475	-0.00770564	0.0131988	-0.0130418	-0.00414147	-0.00803885	-0.00795466	-0.00458613	-0.00434413	-0.00351589	-0.00263862	-0.000736957	0.252222	0.168849	0.0689147	0.489986	4.89986e+11	2.73852	5.89004	8.60333
56	-0.00156806	-0.00267892	-0.00141544	0.00341159	0.000772641	0.00658069	-0.00269929	-0.000749169	-0.00208067	-0.00155735	0.000884315	0.000957764	0.00277934	0.100526	0.0438719	0.0462142	0.190612	1.90612e+11	5.71584	25.6605	17.9569
57	-0.00372722	0.00353605	-0.00167232	0.00540301	-0.00137711	-0.000885514	-0.000381418	-0.000665656	0.00190723	0.00142784	0.000345596	0.00337262	-0.00208837	0.0264404	0.0400073	0.0580659	0.124514	124513538000	1.33511	1.4	4.19439
58	0.0525276	0.00174969	0.0159709	0.0549297	0.000296351	0.000534866	0.00133583	-0.0230708	0.00934383	-0.00969021	-0.0391391	-0.0140723	0.0133052	0.0216704	0.421049	0.665166	1.10789	1107885138000	1.6888	2.24	5.30555
59	0.00760722	-0.00288225	0.00254365	0.00852334	-0.00103583	-0.000922196	0.000664688	-0.00187242	0.00100303	0.000636347	-1.144e-05	0.000126746	-0.00353855	0.0262272	0.035118	0.0367674	0.0981125	98112523900	2.10496	3.48	6.61295
60	-0.000947457	0.0011646	0.00274254	0.00312658	-0.00223177	0.00144262	0.00246565	0.000293302	-0.000751099	0.00157135	0.00446659	-0.0030589	-0.00135894	0.0614004	0.0261576	0.0888444	0.176402	176402339000	2.10496	3.48	6.61295
61	-0.000673818	-0.00112056	0.000108704	0.00131206	-0.00125727	0.00427698	-0.00174074	0.000114903	-0.00277707	-0.00599476	-0.0029976	-0.00434297	-0.00261421	0.07275	0.0888674	0.0995479	0.261165	2.61165e+11	1.59975	2.01	5.02578
62	-0.00271003	-0.00484071	0.0136271	0.0147131	-0.00660632	0.000906423	-0.00110429	0.000224064	-0.00259854	0.00268265	-0.0012411	-0.000290606	0.00232645	0.0861704	0.0550525	0.0385816	0.179804	1.79804e+11	1.87799	2.77	5.8999
63	0.000411942	-4.37845e-05	0.00577889	0.00579372	0.00530848	-0.00110702	-0.00275696	0.000111768	0.00398313	0.000343124	0.00227423	-0.0024877	-0.00476214	0.0917246	0.0443802	0.0952407	0.231346	231345556000	2.47473	4.81001	7.77462
64	-0.143289	-0.0313058	-0.0547169	0.156543	0.0159793	0.00331193	0.000258051	-0.00296834	0.00155626	0.0122696	0.0100288	-0.00755345	-0.000766918	0.195493	0.167942	0.183491	0.546927	5.46927e+11	0.252313	0.05	0.792667
65	0.00995656	-0.025753	-0.0142633	0.0310772	-0.000403473	0.000450415	-0.00868654	-0.00200077	-0.00427936	0.00130335	-0.00191078	-0.00061375	-0.000364389	0.0954043	0.0758348	0.0288892	0.200128	200128309000	1.29641	1.32	4.07279
66	0.00060286	0.000679715	0.000135962	0.000918661	0.00298491	0.00103984	-0.00062502	-0.000265888	0.000253566	-0.0018576	-0.00103251	-0.00261191	-0.00177849	0.0464977	0.0237705	0.0542292	0.124497	124497480000	1.00293	0.789999	3.15079
67	-0.000695824	-0.00284042	0.00275873	0.00402029	0.00179186	-0.00950807	-0.00183427	0.0018429	-0.00275559	-0.00218892	-0.00047378	0.00526182	0.00170316	0.131342	0.0678741	0.0743876	0.273604	273603685000	3.68927	10.6901	11.5902
68	-0.00344423	0.0100907	0.00763737	0.0131155	-0.00145507	0.00108717	9.01349e-05	2.88529e-06	0.0013763	0.000249127	0.000762881	6.85824e-05	0.000304913	0.0263238	0.0162831	0.0113638	0.0539707	5.39707e+10	1.47554	1.71	4.63557
69	0.000509262	-0.00259034	0.0126911	0.0129627	-0.000408489	-0.00221766	0.00240117	-0.000804204	0.00136637	0.00182596	0.00148012	0.00366641	0.000349257	0.0502732	0.0399654	0.0549578	0.145196	145196416000	1.24634	1.22	3.91549
70	-0.00120173	0.0168107	0.0767294	0.0785585	-0.00155415	-0.00158677	-0.000916966	0.00205896	0.00158317	-0.000477067	-0.00125775	-0.0021003	-0.00126909	0.0405788	0.041192	0.0462714	0.128042	1.28042e+11	0.586323	0.27	1.84199
71	-0.00269031	0.00114265	-0.00131011	0.00320309	-0.000957972	-0.00198034	0.00102381	0.00111835	0.000724574	-0.000422316	-0.00170154	0.000527808	0.000559626	0.0396211	0.0226524	0.0278897	0.0901633	9.01633e+10	1.99311	3.12	6.26155
72	0.00128285	-0.000256508	0.000109546	0.00131283	0.000358909	0.000599467	0.000119035	-0.00190208	0.00221529	-0.00063088	-0.0013259	-0.00181261	-0.00033232	0.0107741	0.0474824	0.0347083	0.0929648	9.29648e+10	2.26239	4.02	7.10752
73	0.00249046	0.00931846	0.0053539	0.0110318	-0.000424448	-0.00634176	0.00133751	-0.00256381	0.000610876	0.00130237	-0.0011058	0.002449	-0.00292482	0.0810372	0.0447705	0.0647963	0.190604	1.90604e+11	1.29641	1.32	4.07279
74	-0.0208769	-0.00157309	-0.0105362	0.0234378	-0.00414782	-0.0149295	0.0187029	0.00956005	0.0027167	0.0192775	-0.0172188	0.00149731	0.0277303	0.377802	0.315542	0.464464	1.15781	1.15781e+12	2.84342	6.35005	8.93288
75	0.00259592	-0.00113451	-0.00428662	0.0051382	-9.58991e-05	-0.00398246	0.00636775	0.000823098	-0.00373643	0.00398218	-0.00193255	0.000106442	0.00290054	0.104461	0.0854171	0.0493953	0.239273	239273483900	2.23693	3.93	7.02755
76	0.0026821	-0.00236681	0.00318275	0.00478804	0.000413607	0.00152601	0.00304239	-0.00147148	-0.00110755	-0.00169066	-0.000478169	0.00149559	-0.000426012	0.0498201	0.0426969	0.0239977	0.116515	116514726000	2.04358	3.28	6.42011
77	0.000779692	0.00237506	-0.00104106	0.00270788	-0.00122076	-0.00139917	0.00555829	4.26071e-05	0.000384376	0.0026623	0.00060158	0.000172335	-0.00498157	0.0817821	0.0308929	0.0575549	0.17023	170229899400	7.48093	43.9586	23.5021
78	-0.00516592	0.000709133	0.0161065	0.0169295	-0.00269734	-0.00105853	-0.0108523	-0.000961951	-0.00313477	0.00622135	-0.000559622	0.00449231	0.00130667	0.146081	0.103181	0.063586	0.312848	312848169000	0.805824	0.51	2.53158
79	-0.0856521	0.000207455	-0.0300253	0.0907626	0.0105343	0.000397199	0.0087337	-0.0023018	-0.00335333	-0.00913598	0.0127166	-0.000278369	0.0187757	0.196652	0.147911	0.317706	0.662269	6.62269e+11	0.504627	0.2	1.58533
80	-0.0428417	0.0552791	-0.0768935	0.103941	-0.00186353	-0.00420341	0.00244391	-0.00115389	0.0027034	0.000454482	0.000503278	0.00325868	0.000114905	0.0851086	0.0431177	0.0387686	0.166995	166994932000	1.47123	1.7	4.622
81	-0.000305797	-1.39984e-05	0.00062093	0.000692287	0.000218456	-0.000791244	-0.000425013	0.00201528	0.000111035	0.000324966	-0.00183959	5.66699e-05	-0.000105182	0.0143471	0.0245129	0.0200144	0.0588744	58874371400	15.888	198.3	49.9136
82	0	0	0	0	-0.00177883	-0.000228353	0.000415691	-0.000633374	-0.000388301	0.000180904	-0.00466433	-0.00246481	0.00138224	0.0242288	0.0120258	0.0851138	0.121368	121368362000	0.338514	0.09	1.06347
83	-0.0117185	0.0057899	0.00578918	0.0142954	-0.00854223	0.00691996	0.00560055	0.000635125	0.00355611	-0.00108408	-0.0119386	0.0159815	0.00600087	0.210627	0.0527531	0.33921	0.60259	602590293000	2.82773	6.28005	8.8836
84	0.00397207	0.000616207	0.000617897	0.0040668	-0.000847609	-0.00473312	0.00209762	0.00544274	-0.000660622	0.00168158	0.00458523	-0.00253662	-0.00365296	0.0767835	0.0778494	0.107748	0.262381	262380980000	5.59885	24.6205	17.5894
85	-0.00224459	0.00161061	0.00672004	0.00726575	-0.000794551	0.00204698	0.0022722	0.00216493	-0.000182314	-0.000570828	-0.00344738	0.00649937	0.00654282	0.0511374	0.0291807	0.164896	0.245214	245213828000	3.03407	7.23007	9.53184
86	-0.0122381	0.00186928	-0.00414774	0.0130564	0.00745565	-0.00642199	-0.0096489	-0.00249236	0.00613356	-0.0101035	-0.00170601	-0.00979249	-0.000435696	0.235265	0.187294	0.119342	0.541902	5.41902e+11	2.23407	3.92	7.01856
87	0.0021906	-0.00316651	-0.00133678	0.00407585	-0.00577912	0.00754665	0.0133661	-0.00103818	0.00094977	0.000545357	-0.0043053	0.00401398	0.0116178	0.266919	0.025333	0.199371	0.491623	4.91623e+11	2.06219	3.34	6.47859
88	-0.0231524	-0.0238861	-0.0461942	0.0569252	0.0131032	-0.00346368	0.00850671	-0.00176078	0.00180055	-0.0115044	0.0124595	-0.0170833	0.0151882	0.250736	0.150657	0.44731	0.848703	8.48703e+11	0.607651	0.29	1.909
89	-0.00675375	-0.00259543	0.0097867	0.0121708	0.00213589	-0.00471816	0.00299234	-0.000101649	-0.00303243	0.00340755	-0.00161041	0.000648977	0.000901281	0.0984639	0.0654163	0.0316067	0.195487	195486849000	2.06527	3.35	6.48825
90	0.000106548	0.000910008	0.00125262	0.00155194	-0.00134047	-0.000978251	2.99292e-05	0.00156115	0.00101426	-0.000481973	-0.00125059	-0.000240149	-0.00102443	0.0234865	0.0305738	0.0251517	0.079212	79212026600	1.92817	2.92	6.05753
91	0.00574942	-0.0354402	0.00633129	0.0364575	0.000406012	0.000318294	0.000881439	-0.00108042	-0.00105028	-7.61398e-05	-3.70835e-05	0.0002191	-0.000366659	0.0160575	0.0220684	0.00622842	0.0443542	44354234300	0.276395	0.06	0.868323
92	0.00226605	-0.00650524	-0.0126684	0.0144202	0.000986967	0.00173886	-0.00140839	0.000599415	0.00154876	-0.000440422	-9.25555e-05	-0.000736227	1.48117e-05	0.0413421	0.025886	0.00843594	0.075664	7.5664e+10	0.677027	0.36	2.12695
93	-0.00109685	-0.0176607	-0.000970504	0.0177213	-0.0006535	-0.000702678	0.00251438	0.00584435	0.0018548	0.00106359	0.00171325	0.000422817	0.00271614	0.0387056	0.0876274	0.0485221	0.174855	174855070000	0.844402	0.56	2.65277
94	0.00711068	3.04677e-05	-0.00025517	0.00711533	0.00310519	-0.00856346	-0.000611223	0.0128088	-0.00356118	0.00330062	0.00321933	-0.00334051	0.000534876	0.122799	0.196705	0.0709472	0.390451	3.90451e+11	3.87115	11.7702	12.1616
95	0.0459678	-0.00360024	-0.0133936	0.0480145	0.00195278	0.00769373	0.00577569	0.0146042	-0.00454775	0.000517376	-0.0235946	0.0255707	0.0171717	0.154222	0.196694	0.66337	1.01429	1014285817000	2.55823	5.14002	8.03692
96	0	0	0	0	0.00109684	-0.00378664	-0.00654307	-0.00343818	-0.00396626	-0.00153929	0.00135534	-0.00678222	-0.0083074	0.114265	0.0894373	0.16445	0.368152	368152410000	0.422201	0.14	1.32639
97	-0.000516001	-0.00334287	0.000562278	0.00342888	-0.00757362	-0.00617706	-0.000521193	0.00711734	0.00476696	-0.00259577	-0.00562777	-0.00620265	-0.00320463	0.142719	0.144801	0.150351	0.43787	4.3787e+11	2.57805	5.22002	8.09919
98	-0.00158197	-0.000221315	-0.00511506	0.00535868	-0.0015977	-0.00442594	0.000943473	0.00096842	0.00607442	0.0033909	0.000278421	0.00292002	0.00330281	0.0696711	0.104337	0.0650126	0.239021	2.39021e+11	1.33511	1.4	4.19439
99	-0.00303455	-0.00975442	0.0006649	0.0102371	0.00337807	-0.000784652	-0.0051698	0.00131949	0.00148328	0.0132227	0.0015753	0.00436312	0.00456113	0.0933252	0.160254	0.104996	0.358575	358575070000	2.00903	3.17	6.31156
100	-0.0221618	0.0103963	0.0083658	0.0258692	-0.00195243	0.00455618	-0.00136607	-0.00102732	-0.00346262	0.00592698	-0.00322989	0.000489459	-0.0014629	0.0787469	0.104169	0.0518224	0.234739	234738609000	0.902703	0.64	2.83593
101	-0.00028593	-0.0068781	0.00141419	0.0070278	-0.00135401	0.000477021	-0.000617023	-0.00527483	0.00904415	0.00496706	-0.00734664	0.000199081	-0.00796636	0.0244805	0.19286	0.155121	0.372462	3.72462e+11	1.24122	1.21	3.89941
102	-0.0128886	0.0147202	-0.0169466	0.0258841	0.00013782	0.00156372	0.00206444	-0.000945365	0.0029281	0.00273514	-0.00075747	-0.000743317	-0.00204675	0.0376599	0.0660861	0.0354754	0.139221	139221337000	0.996558	0.78	3.13079
103	0.000564041	-0.00472684	-0.00121939	0.00491406	0.00682333	0.00416674	0.00248032	-0.012069	-0.00115547	-0.00574986	0.0155619	-0.0139725	-0.000121592	0.134704	0.189744	0.296561	0.621008	621008362000	5.64751	25.0505	17.7422
104	0.00124761	-0.00131243	0.00138375	0.00227898	-0.0036817	-0.0053218	0.0159131	0.00172384	0.00105249	-0.00512122	-0.00104364	0.000224349	0.0062008	0.249166	0.0789755	0.0746878	0.402829	4.02829e+11	3.28589	8.4801	10.323
105	0.000651475	-0.00508451	0.00207681	0.0055308	0.000621231	0.00314277	-0.00308928	0.00117677	0.00202383	0.00134444	-0.00276991	0.000733134	0.000513284	0.0685329	0.0454505	0.0401633	0.154147	154146641000	1.04031	0.85	3.26825
106	-0.00210738	-0.000122697	0.000883069	0.00228821	-0.000631236	0.00259533	-0.00651967	-0.00552309	-0.00378221	0.00266	0.00581016	-0.0014831	0.00184224	0.0974624	0.119653	0.091355	0.30847	308470385000	7.24424	41.2191	22.7585
107	0.000168659	-0.0011838	-0.00368927	0.00387821	0.00186162	0.00865949	-0.00472485	-0.00416782	0.00266302	-0.00470951	-0.00367949	0.00698316	0.000497459	0.152459	0.115403	0.111601	0.379464	379464131000	6.1183	29.4006	19.2212
108	-0.00571123	0.0156573	-0.00194761	0.0167798	0.000186497	-0.000185301	-0.000828356	0.00623772	0.000135388	-0.00299528	-0.00208316	0.00365865	-0.0025123	0.0120015	0.0936839	0.0825411	0.188227	188226512000	0.478731	0.18	1.50398
109	-0.000299159	-0.00126518	-0.00143521	0.00193649	-0.000713178	-0.000510352	0.00142014	-0.00122826	0.00158211	0.00107688	0.00070467	0.000302196	-0.000440133	0.0264367	0.0388725	0.01447	0.0797792	7.97792e+10	2.93164	6.75006	9.21004
110	0.00210281	0.00106901	-0.00232863	0.00331468	0.000626772	0.00417462	-0.00506988	0.00164259	0.00286743	0.000763418	-0.00289621	-0.00131908	0.0029173	0.0987127	0.0527343	0.0713259	0.222773	222772892000	1.11132	0.969999	3.49133
111	0.000602379	0.00895431	0.00627861	0.0109528	0.0042305	-0.000115688	-0.00164997	0.00304085	-0.00114048	0.00196234	-0.00237194	0.00385183	-0.00077735	0.0599616	0.0614368	0.0700111	0.19141	191409542000	1.63517	2.1	5.13706
112	0.574734	-0.587735	0.99466	1.29039	-0.00265864	0.00170142	0.00481756	0.00242069	0.00429877	-0.000938639	0.00455069	-0.000689563	0.00907778	0.0917762	0.0765809	0.14318	0.311537	311537484000	0.319154	0.08	1.00265
113	0.0168273	0.0123913	0.00768257	0.0222648	-0.00536006	-0.00185885	0.000255829	-0.00192049	-0.000792097	-0.00591978	0.00902184	0.00379664	0.00251131	0.0747475	0.0863236	0.153298	0.314369	314369112000	0.374241	0.11	1.17572
114	0.00191527	0.00214396	-0.00487108	0.00565617	0.000782376	-0.00127691	0.000595824	-0.00022571	0.00133695	-0.000229167	-0.000413164	-0.000393966	-0.000486709	0.0265511	0.0179182	0.0129384	0.0574078	5.74078e+10	1.64294	2.12	5.16147
115	-0.00219584	0.000120197	0.00945588	0.00970823	0.00200299	-0.00103126	0.00204038	-0.00136811	0.000841665	-0.000376289	0.0031086	0.000171588	0.00180715	0.0507463	0.0258606	0.0508734	0.12748	127480394000	1.72608	2.34	5.42267
116	-0.000646157	0.00639736	0.00528394	0.00832249	0.013736	-0.000275098	0.00622108	-0.022093	0.00243046	-0.00644649	-0.00297812	-0.00502054	0.000159002	0.202322	0.3097	0.0815766	0.593598	593597957000	1.16721	1.07	3.66689
117	0.018437	-0.00536129	-0.00242747	0.0193536	-0.000193366	0.00139503	-0.00245879	0.00246786	-0.00126068	0.000778319	0.0011009	0.00278097	-0.00313922	0.0404718	0.0450685	0.0702109	0.155751	155751303000	1.88477	2.79	5.92118
118	0.000621968	-0.0111107	0.0397156	0.0412452	0.00260877	-0.0105848	-0.00547402	0.0273407	-0.00278949	-0.00751911	-0.00119042	-0.000802622	-0.00256538	0.186675	0.376493	0.0455843	0.608753	608753135000	0.821472	0.53	2.58074
119	0.000819725	-0.00233886	0.00327183	0.00410452	0.000591641	0.002183	0.00172442	0.00254862	-0.00498881	0.00260692	-0.00498346	-0.00871121	-0.000249542	0.0449906	0.101443	0.139442	0.285876	285876150000	2.0498	3.3	6.43966
120	-0.00515082	0.00862327	0.00437909	0.0109576	0.00122501	-0.00421456	0.00717893	-0.0020987	0.00571764	0.00237428	0.0037082	0.00401787	0.000176569	0.126185	0.101906	0.0790264	0.307117	3.07117e+11	0.797884	0.5	2.50663
121	-0.0111351	-0.0119252	-0.00977613	0.0190203	0.000503509	0.00534837	0.00509607	-0.0026373	0.00393464	0.000610301	-0.00251192	-0.00297457	-0.00215455	0.109479	0.0718224	0.0764104	0.257712	2.57712e+11	0.722515	0.41	2.26985
122	0.0192128	0.00289796	-0.0183509	0.0267261	0.0191702	-0.000522366	-0.00300272	-0.0125594	0.0080057	-0.00225389	-0.0181425	2.03545e-05	-0.0057336	0.226953	0.228189	0.238964	0.694106	694106046900	1.50545	1.78	4.72951
123	0.000854005	0.00138935	0.00178242	0.00241591	-0.0014715	-0.000481798	-0.000701698	0.00109664	0.0003211	-0.00119483	-0.00237116	0.000486889	-0.00182835	0.02655	0.0261256	0.046864	0.0995395	9.95395e+10	2.15871	3.66	6.7818
124	-0.00506917	-0.00391308	-0.00361408	0.00735325	0.000450758	-0.000550403	7.90124e-05	0.00321947	-0.000544548	-0.00544942	-0.000210946	-0.000343967	0.000838114	0.0108017	0.0921344	0.0139303	0.116866	1.16866e+11	0.789865	0.49	2.48144
125	0.0012937	-0.00337364	-0.00605843	0.00705406	0.000120272	-0.00310845	-0.000281643	0.00129583	-6.11627e-05	-0.000398108	-0.000680119	-0.000871517	0.00191694	0.0351036	0.017551	0.0346857	0.0873404	87340382700	1.49696	1.76	4.70286
126	-0.00861989	0.00299091	0.00194822	0.00932972	0.00522218	0.00301587	-0.00767846	0.00588675	-0.000904146	-0.00389683	0.00206802	0.00234796	-0.00405228	0.159165	0.106877	0.0846826	0.350725	350724907000	1.12272	0.989999	3.52715
127	-0.00697361	0.00992353	-0.0102209	0.0158611	0.0241214	0.00131939	-0.00105642	-0.00383295	0.00610169	-0.0139461	-0.00966375	0.00167967	-0.00601787	0.264972	0.238807	0.173613	0.677393	677392570000	3.88107	11.8302	12.1928
128	-0.00431702	0.00963343	0.000378458	0.0105633	-0.00071766	0.000123928	0.000437421	-0.000262387	0.00209001	0.000904905	0.00031561	0.00501599	0.00399694	0.0127901	0.032573	0.0932854	0.138649	138648508000	1.29641	1.32	4.07279
129	-0.00258814	-0.00884066	0.0292317	0.0306488	-0.0346252	-0.00560905	-0.00849718	-0.0116373	-0.00420624	-0.0423955	0.00437634	-0.00207021	0.00262436	0.487314	0.58239	0.0907091	1.16041	1160412520000	1.94461	2.97	6.1092
130	-0.00605656	0.00703991	0.0064154	0.0112871	0.00340976	-0.000386069	0.00067605	0.0044943	-0.00639748	0.00286331	0.00296055	-0.00833521	0.0034645	0.0447188	0.137551	0.147603	0.329872	3.29872e+11	1.5676	1.93	4.92476
131	4.49794e-05	-0.00131163	-0.00106346	0.00168919	-0.00350595	-0.00822673	-0.00668782	0.00966862	-0.00463195	0.00231765	0.0065139	0.00981224	0.00126656	0.184205	0.166182	0.175927	0.526314	5.26314e+11	1.80893	2.57	5.68293
132	-0.0100219	0.000101506	-0.00497047	0.0111873	-0.00465414	0.000721965	0.00317402	-0.00177683	0.00454871	0.00272679	-0.00225744	0.00996916	-0.00480432	0.0855013	0.0905233	0.170309	0.346334	346333868000	2.53573	5.05002	7.96624
133	0.000558162	0.000164388	-0.000896728	0.00106897	0.00939157	-0.000518172	0.00869126	-0.00719402	0.000173863	-0.00527158	-0.00874507	-0.00313761	-0.00506817	0.18601	0.126395	0.169508	0.481913	481913095000	5.36426	22.6004	16.8524
134	-0.0162728	0.0718705	-0.0183734	0.0759458	0.00149389	0.0118475	0.00729444	-0.0190254	0.00213576	0.0192562	0.0353742	-0.02468	0.0327283	0.206359	0.404174	0.927825	1.53836	1.53836e+12	1.82645	2.62	5.73796
135	-0.0250763	-0.00311835	0.0101872	0.0272456	0.000986677	-0.00591544	-0.000677642	0.00163889	-0.00103057	-0.00012901	-0.000558506	-0.00327417	-0.00749435	0.0757976	0.0279847	0.11327	0.217053	2.17053e+11	0.844402	0.56	2.65277
136	0.00593147	0.00337417	-0.00049881	0.00684223	-0.00468079	0.000320409	-0.00425556	-0.00326523	-0.000633264	-0.000232351	0.000207309	-0.00297953	-0.000544658	0.0925676	0.0413085	0.037315	0.171191	171191010000	3.55573	9.93013	11.1707
137	0.00554756	-0.00481203	0.00151308	0.00749803	0.000291992	-0.0011952	0.00170523	-0.000274558	-0.001659	0.000483679	-0.00286753	0.00171243	-0.00046856	0.0319243	0.0241724	0.0504852	0.106582	106581811000	1.6888	2.24	5.30555
138	0.00242117	-0.000653056	-0.0102439	0.0105463	-0.0032447	0.000437003	-0.00139665	-0.00406399	0.000478427	-0.000618602	-0.0263815	0.0062925	-0.0124568	0.0507836	0.0516102	0.451308	0.553702	553701632000	2.8613	6.43005	8.98907
139	-0.00335903	2.93034e-08	-0.00236486	0.004108	-0.0051573	-0.00425562	0.00692779	-0.00281736	-0.00762438	-0.00484495	-0.0203768	0.00739725	0.0026317	0.163407	0.152867	0.304058	0.620332	620332050000	4.09033	13.1402	12.8502
140	0.00919947	-0.000806505	0.0153169	0.0178854	0.000799824	-0.00428828	0.00356764	0.000699113	0.000157869	-0.00090644	0.00214683	0.000284515	0.00829755	0.0865575	0.0176342	0.107289	0.211481	2.11481e+11	0.298541	0.07	0.937897
141	-0.00151297	0.0191363	-0.00236714	0.0193414	0.00297394	0.0162771	-0.00337411	0.00330719	-0.000377292	-0.000877915	0.00481245	-0.000146636	0.00169688	0.226251	0.045624	0.0665596	0.338435	3.38435e+11	2.23693	3.93	7.02755
142	-0.0228441	0.00190858	0.00250271	0.0230599	0.000478221	2.53687e-05	0.000721117	0.00276867	0.000401096	-0.0011347	0.0020004	-0.000667779	0.00111351	0.0122471	0.0430447	0.0378168	0.0931085	9.31085e+10	1.03418	0.84	3.24897
143	0	0	0	0	0.00240447	0.000446667	-0.0033326	0.000172276	-0.0006111	0.000194855	0.00183142	0.000296466	-0.00250885	0.0618374	0.00978231	0.0463674	0.117987	1.17987e+11	0.252313	0.05	0.792667
144	-0.00758843	0.00205631	0.00439575	0.00900751	0.00873572	-0.00587993	-0.00581412	0.00468482	-0.00586626	0.0106301	-0.00278701	0.0054114	0.00442025	0.204298	0.211812	0.126187	0.542297	5.42297e+11	4.08562	13.1102	12.8354
145	-0.00390637	0.00261296	-0.000536045	0.00473018	0.000362321	0.000235422	-0.000474796	0.000162495	-0.00197004	0.00294438	0.00132322	0.00112789	-0.00215195	0.0107254	0.0507692	0.0460305	0.107525	107525136000	1.02179	0.819999	3.21006
146	0.0107045	-0.00975567	0.00182858	0.0145981	0.000415344	0.00456085	-0.00262222	-0.00161245	-0.000855963	-0.00511587	0.00846569	-7.32216e-05	-0.00798727	0.0759842	0.0758429	0.165262	0.317089	317088902400	3.62311	10.3101	11.3824
147	0.000526135	-0.00608823	0.00409786	0.0073577	-0.00605077	-0.00174377	-0.00317344	0.00779721	-0.00135447	0.00773289	0.00678277	-0.00139163	0.00474651	0.10968	0.168846	0.129209	0.407735	4.07735e+11	3.74072	10.9902	11.7519
148	0.00640043	0.000677767	-0.0110708	0.0128057	-0.00604693	0.0085587	0.00831625	-0.00349822	0.0119289	-0.00625066	-0.010518	0.0117957	0.000364956	0.229219	0.216778	0.226786	0.672783	6.72783e+11	3.2075	8.08009	10.0767
149	0.00149194	-0.0406883	-0.0107705	0.0421161	0.0214179	0.00632376	0.0153347	0.000738962	0.00194206	0.00113933	0.00714935	-0.0204594	0.00241859	0.430764	0.0382035	0.300273	0.769241	7.69241e+11	2.31525	4.21	7.27358
150	0.00518146	0.00177057	-0.000343483	0.00548639	0.000514098	0.00105981	0.00197572	-0.0030353	0.00209986	0.00244973	-0.000161044	-0.00140234	-0.00191022	0.0354963	0.0758489	0.0347361	0.146081	146081316000	1.84723	2.68	5.80326
151	-0.00058192	0.001907	-0.000106121	0.00199663	-0.00298717	-0.000136094	0.00298407	2.24607e-05	-3.4002e-05	0.000292934	-0.00362888	-0.00528882	0.00505603	0.0610733	0.00349397	0.139737	0.204305	2.04305e+11	2.41748	4.59001	7.59476
152	-0.000501156	-0.00129155	0.00265936	0.00299857	-0.000908904	-0.000628674	0.000531623	0.001385	0.000895933	-0.000808223	-0.00261496	0.000335335	-2.2182e-05	0.020692	0.0308916	0.0297247	0.0813083	8.13083e+10	2.43061	4.64001	7.636
153	0.00199469	0.00248548	0.000513959	0.00322809	0.00172473	0.00036592	-3.58943e-05	0.000217635	-0.00178407	0.0011497	-0.000333754	-0.000611751	0.00158257	0.0212655	0.0315141	0.0252808	0.0780604	78060420500	2.58545	5.25002	8.12245
154	2.69897e-05	-8.21841e-06	-0.00204016	0.00204035	-0.0264249	-0.00981413	0.0129285	0.0013228	-0.00324357	-0.019356	-0.00611121	-0.00441368	0.00472853	0.491675	0.239224	0.152534	0.883434	8.83434e+11	2.02795	3.23	6.37101
155	-0.00681288	9.6613e-05	0.0213759	0.0224355	0.0158701	0.0340192	0.00125857	-0.00992518	-0.0171099	-0.00469431	0.00111492	2.39251e-05	0.00514612	0.511478	0.317294	0.0628496	0.891621	8.91621e+11	0.686366	0.37	2.15629
156	-0.00139822	0.000744933	-0.0102886	0.0104098	-0.00152619	0.00256958	-0.000388181	0.000249799	-0.00259708	0.000622336	0.000620748	0.00025017	0.00294206	0.0448395	0.0346922	0.0381298	0.117661	1.17661e+11	1.80541	2.56	5.67188
157	0.00128135	0.00161376	-0.000596107	0.0021451	-0.00265993	0.00400238	-0.00921578	-0.00222887	0.000409661	-0.00445824	0.000396196	0.00200106	0.00636458	0.158781	0.0709677	0.0876183	0.317367	317366981000	4.03859	12.8102	12.6876
158	-0.0153238	0.0229706	-0.00215176	0.0276965	0.00146946	0.00258331	-0.000231134	0.00163422	0.00138291	0.00281106	-0.00113013	-0.00189134	-0.000760252	0.042839	0.0582818	0.0378173	0.138938	138938144000	1.5676	1.93	4.92476
159	0.000908577	-0.000673892	0.00140111	0.00180076	-0.000363194	-0.00105485	0.0026334	-0.00810793	0.00315476	0.00540074	0.00959118	-0.00367873	-0.00163457	0.0405145	0.166634	0.149045	0.356194	356193569000	2.83896	6.33005	8.91889
160	-0.00185921	0.00303322	0.000884502	0.00366598	-0.00303989	0.000165448	0.00142118	-0.00100018	0.000730382	0.000738408	0.00296799	-0.000483269	0.00303212	0.0462652	0.0246897	0.0648337	0.135789	1.35789e+11	2.1851	3.75	6.86472
161	0.00312134	-0.00083446	0.00272554	0.00422701	-0.00940699	0.00760439	0.00574344	0.00313981	0.00772888	-0.00256312	0.000365937	-0.000573581	0.0109237	0.227548	0.134318	0.118633	0.480499	480498945000	10.7819	91.3211	33.8724
162	-0.0116471	-0.0134172	-0.000406173	0.0177719	-0.000808482	-0.00624607	-0.0196495	0.00540684	0.000719028	-0.0105782	0.0318054	0.0147281	0.000551848	0.26704	0.16704	0.470854	0.904935	9.04935e+11	4.21448	13.9502	13.2402
163	0.00197756	-0.00484197	0.00353486	0.00631274	-0.00130475	-0.000969209	-0.00154501	-0.00446936	-0.00477756	0.000134354	-0.00109708	-0.00357539	-0.00037765	0.0381897	0.0938128	0.0505012	0.182504	1.82504e+11	2.23976	3.94	7.03643
164	0.0131339	-0.000815543	0.0159941	0.0207117	-8.80162e-05	0.0017341	-0.00287265	0.00118235	-0.00181861	0.00193441	-5.87595e-05	0.00155863	-0.00265524	0.0469477	0.0493537	0.0427263	0.139028	139027757300	1.57165	1.94	4.93751
165	-0.0191731	-0.0141565	-0.00410607	0.0241842	0.00831341	0.00731627	0.0112731	0.00822471	0.00715256	0.0055935	-0.010585	0.00353277	-0.00330531	0.269028	0.209708	0.174231	0.652966	652966270000	0.957461	0.72	3.00796
166	0.0055722	-0.00425358	0.000708824	0.0070459	4.20982e-05	0.000561583	-2.55091e-05	-0.00102338	-0.000609002	-0.000983978	0.00107921	-0.0012353	-0.00234898	0.0062919	0.0261636	0.0466349	0.0790904	79090363800	1.65837	2.16	5.20995
167	0.000721779	-0.0047127	0.00136071	0.00495803	0.00422376	-0.00251072	0.00712607	-0.00452	0.00291771	0.00635335	0.000587701	-2.88038e-05	3.26711e-05	0.138605	0.137911	0.00649176	0.283008	283007779200	1.59975	2.01	5.02578
168	0.000678088	0.00185187	-0.0011894	0.00230302	-0.00144284	0.000471249	-0.0015745	0.000706332	0.00138468	-0.00152528	-0.000931449	-9.98209e-05	0.000774427	0.034886	0.0361629	0.018057	0.0891058	8.91058e+10	2.29035	4.12	7.19536
169	0	0	0	0	0.00993624	-0.00307502	0.00553554	-0.00167744	0.000762304	-0.00403194	0.00681585	-0.00213349	0.00410478	0.185468	0.0647168	0.130541	0.380726	380725985000	0.225676	0.04	0.708983
170	-0.00994594	-0.00125378	-0.00787261	0.0127464	-0.019051	0.0201416	0.00696854	-0.00197636	0.0223016	-0.00617181	0.000244252	0.0123449	-0.0157103	0.461612	0.304498	0.282994	1.0491	1049103798000	3.65288	10.4801	11.4759
171	-0.00812934	-0.000589138	0.00193158	0.00837641	0.000649617	-0.000769987	0.000180499	0.00309133	-0.000730465	-0.000255951	-0.00338956	-1.42493e-05	-0.0012709	0.016001	0.0407774	0.0467471	0.103526	1.03526e+11	0.874039	0.6	2.74588
172	0	0	0	0	0.000481662	-0.000453946	-0.000810182	-0.00049808	9.95449e-05	0.000358335	0.00102841	0.000104987	-0.000493994	0.0174579	0.0095596	0.0162739	0.0432914	43291405600	0.374241	0.11	1.17572
173	-0.0184288	0.00220709	-0.0167884	0.0250268	0.000740247	-0.000262383	0.000118727	0.000726283	0.00278316	-0.00304945	-0.001287	-0.000958143	-0.000123732	0.0112136	0.0655889	0.0236887	0.100491	1.00491e+11	0.597082	0.28	1.87579
174	0.00565148	-0.00988339	0.00284131	0.0117343	-0.00438007	-0.00266804	-0.00172739	-0.0034706	-0.000542774	0.000621298	-0.00396348	-0.000586896	-0.00215265	0.087755	0.0463467	0.0670302	0.201132	201131956000	0.996558	0.78	3.13079
175	-0.000419844	0.00731602	0.00711671	0.0102151	-0.00340975	0.00133534	-0.000232035	0.00263263	-0.000628299	0.000888294	-0.00144019	-0.000288548	-0.000452065	0.0497712	0.0414923	0.021808	0.113072	113071508000	0.983697	0.76	3.09038
176	-0.0197415	0.00141716	0.00314188	0.0200401	0.000180518	-0.000107685	-0.00238524	-0.00280163	0.000853637	-0.00227195	-0.000903502	0.00338842	0.00189697	0.0267344	0.0592722	0.0618888	0.147895	147895440000	1.35875	1.45	4.26865
177	0.00603596	-0.00296122	0.00236359	0.00712658	0.000858005	-0.000626485	-0.00131659	-6.61e-05	-0.00125456	0.000520836	0.000357038	0.000918747	0.00213615	0.0280108	0.0184149	0.0341194	0.0805451	8.05451e+10	1.32073	1.37	4.14922
178	0.0159815	-0.0304348	0.0072428	0.0351303	-0.00403586	-0.0014606	-0.00141105	0.00337037	0.000692907	-0.00212853	-0.00359154	-0.00326443	-0.00125774	0.0690751	0.061918	0.0811371	0.21213	2.1213e+11	0.586323	0.27	1.84199
179	0	0	0	0	0	0	0	0	0	0	0	0	0	0	0	0	0		0.195441	0.03	0.613997
180	0.00448784	0.00236278	0.00629333	0.00808266	-0.00144926	-1.41009e-05	-0.00180271	-0.00272212	-0.000452156	-0.000387641	-0.00136901	-0.000100135	-0.000967131	0.0326607	0.0356192	0.0243628	0.0926427	92642660400	2.00268	3.15	6.29162
181	-0.0267821	0.0228995	0.013495	0.0377331	-0.00151924	-0.00407855	0.000493381	-0.00275658	0.00231469	0.00114509	0.000592809	0.000222173	-0.00339605	0.0609117	0.0621636	0.0421104	0.165186	1.65186e+11	0.638308	0.32	2.00531
182	0.00106995	-0.0169327	0.00568287	0.0178929	0.00820003	0.0072966	-0.000485705	0.00404723	0.0029381	-0.0087914	-0.0103895	0.00124801	0.00420769	0.159823	0.157767	0.158452	0.476043	476042749000	3.39646	9.06011	10.6703
183	-0.00274151	0.00123054	-0.0015895	0.0033995	0.00228478	-0.00150204	-0.00233989	-0.0019211	0.00037619	-0.00280263	-0.000572147	-0.000144504	0.00076659	0.0612671	0.0509992	0.0148324	0.127099	127098782000	2.04669	3.29	6.42989
184	-0.00221129	0.00101286	-0.00203508	0.00317131	0.000418167	-6.44389e-05	-7.16953e-05	0.00242952	0.00168302	0.00697829	-0.00332374	-0.000818301	-0.00338082	0.00554301	0.110908	0.0752285	0.19168	1.9168e+11	3.23513	8.22009	10.1635
185	-0.00293669	-0.00318033	-0.00178121	0.00468096	0.000261316	0.00032805	-0.00236836	-4.10621e-07	0.00240317	-0.000105321	-0.0030661	-0.000247535	-0.000353653	0.0295773	0.025089	0.0366728	0.0913391	91339138213	1.43619	1.62	4.51194
186	0.0316997	-0.00929694	0.0548969	0.0640701	-0.00116389	-0.00591147	0.00353735	-0.00480054	-0.00229595	0.00627776	-0.000818235	-0.00502664	0.00285472	0.106127	0.133742	0.086996	0.326865	3.26865e+11	0.977204	0.75	3.06998
187	-0.0142239	0.00959431	-0.0630997	0.0653907	-0.0161708	0.00722565	0.00368508	-0.00853957	0.0036329	0.00808251	-0.0145037	0.024932	0.000543253	0.270815	0.20255	0.399789	0.873155	873154641000	1.97386	3.06	6.20107
188	0	0	0	0	-0.00547124	0.00401135	0.00138643	-0.0049885	0.00366447	0.00125488	-0.0071484	0.00522067	0.00183801	0.10869	0.0990786	0.142071	0.34984	3.4984e+11	0.225676	0.04	0.708983
189	0.00285307	-0.00300014	0.0038756	0.00567108	0.00700036	-0.00387296	-0.00419911	-0.00352358	0.00180649	0.00450936	-0.00167101	-0.000490951	0.000937974	0.150724	0.0983943	0.0309993	0.280118	280117876000	3.33016	8.7101	10.462
190	0.00222258	0.000135299	-0.00697802	0.00732468	-0.00539472	-0.000708855	-0.0102498	-0.000862241	-0.000125316	-0.00737711	0.00153318	0.00161129	0.00804731	0.163534	0.0836466	0.111918	0.359098	359098084000	1.30131	1.33	4.0882
191	-0.00141637	0.0013216	-0.00121399	0.00228616	0.00125399	-0.000675051	-0.000409458	-0.00098813	-0.000359938	-0.000592559	0.00170897	-0.0013666	-3.13104e-05	0.023385	0.0194063	0.0310688	0.0738601	73860057100	1.77338	2.47	5.57126
192	-0.0125973	0.0180535	-0.00277499	0.0221883	4.72832e-05	-0.00712755	0.000876442	-0.000921179	-0.000612423	0.00115564	-7.90001e-05	-0.00109654	-0.000711373	0.0805127	0.0268924	0.0188691	0.126274	126274260300	0.638308	0.32	2.00531
193	-0.000511915	-0.00159672	0.00129255	0.00211713	-0.00300765	-0.000450758	-0.00319233	0.00476256	0.00927538	-0.00248154	0.00218508	0.00755552	-0.00216612	0.0665074	0.165195	0.119067	0.350769	350769470000	2.39366	4.50001	7.51994
194	0	-0.000212646	0	0.000212646	-6.67343e-05	-0.00146096	0.000204302	0.00059762	0.00266437	1.51686e-05	0.000316697	0.00234754	-0.000236094	0.01732	0.0327716	0.0290034	0.079095	7.9095e+10	0.437019	0.15	1.37294
195	-0.00161543	-0.0222135	0.0147145	0.0266939	-0.000349775	-0.000511132	-0.00102969	-0.00137663	0.000305649	0.00149272	-0.00783927	-0.000324639	-0.000337935	0.018906	0.03175	0.0850185	0.135674	135674448000	0.628255	0.31	1.97373
196	-0.0106136	-0.00527441	-0.00637863	0.0134594	0.00166645	-0.000705798	0.00821549	0.00410326	-0.00417265	0.0041213	-9.06157e-05	-0.00241849	-0.00224834	0.105877	0.123972	0.0475744	0.277424	277423956700	0.338514	0.09	1.06347
197	0.00405772	0.000730072	0.000334415	0.00413642	0.00106149	-0.000869178	-0.000191359	-0.0017801	-0.00133207	0.00201912	-6.83102e-05	-0.000493983	0.00336663	0.0212203	0.0513129	0.0392892	0.111822	1.11822e+11	1.86097	2.72	5.84642
198	0.00583866	0.0196194	0.0168612	0.02652	0.00154609	-0.00721279	-0.00756247	-0.00346086	-0.00423705	0.0058332	-0.00302881	0.00237819	-0.00565613	0.163214	0.135311	0.110631	0.409156	409155830000	0.957461	0.72	3.00796
199	0.00132496	0.00644146	0.0110916	0.0128946	0.0142113	-0.0170038	0.00205711	-0.011726	-0.000326271	0.00399716	0.0280545	-0.000243383	-0.0177127	0.332723	0.160495	0.460106	0.953323	953323234000	3.72364	10.8902	11.6982
200	-0.00787838	-0.00229118	-0.0117723	0.0143494	-0.00808234	0.00450766	0.00266261	-0.00468821	0.00326806	0.00530347	0.00301984	0.00360345	-0.000946991	0.152526	0.132597	0.0757028	0.360826	360826377000	0.983697	0.76	3.09038
201	-0.00323548	-0.00345948	-0.00932281	0.0104571	-0.000648721	-0.000405713	-0.00119525	-5.02197e-05	0.00192025	-0.000158698	0.000530609	0.00174124	0.000511938	0.0224968	0.0212917	0.0278379	0.0716264	71626436700	0.881292	0.61	2.76867
202	-0.000747155	-0.000983978	0.0030149	0.00325823	-0.000518817	-0.00780736	0.00916362	0.000350828	-0.0253268	-0.000398203	-0.00966331	-0.000928821	-7.81251e-06	0.174898	0.260758	0.105999	0.541655	541655488110	6.93749	37.7997	21.7948
203	-0.00339012	-0.000310289	-0.00412765	0.00535039	-0.00496329	0.00303208	0.00700493	0.0161051	-0.00358905	0.00478038	-0.00315154	0.00318173	0.00360265	0.150003	0.244745	0.0993592	0.494107	494107030000	3.0278	7.20007	9.51215
204	-0.00628392	-0.00391817	0.00430117	0.00856387	0.000525297	-0.000476465	-0.000179628	-0.00690665	-0.00728384	0.0089116	0.000482188	-0.00452981	0.00317776	0.0118139	0.231021	0.0818976	0.324732	324732282000	4.72313	17.5203	14.8382
205	-0.00491683	0.00837684	0.00192151	0.00990146	-0.00693084	-0.0121603	0.00855923	-0.0189261	-0.0329899	-0.0115415	0.000841858	0.0115848	0.00162564	0.276504	0.634575	0.140523	1.0516	1051602070000	1.22053	1.17	3.83441
206	-0.00140616	-0.00570744	-0.00946243	0.0111396	0.000127746	0.000613013	0.00186792	0.0145148	0.0056059	-9.4038e-06	-0.010411	0.0011549	0.00120861	0.0260868	0.201301	0.127745	0.355133	355132953970	0.451352	0.16	1.41797
207	-0.00799456	0.134551	0.0207021	0.136368	-0.0108566	0.00241581	-0.00334187	-0.00623554	0.0103375	-0.00109366	0.00516012	-0.00377534	0.0111455	0.166142	0.176667	0.200809	0.543619	5.43619e+11	0.56419	0.25	1.77246
208	0.0101344	0.000895894	-0.0176296	0.0203546	0.00963701	0.00569233	-0.00146544	0.000899167	-0.000365865	-0.00691891	-0.00800485	0.00568272	0.00358192	0.167948	0.0818394	0.172695	0.422482	422482113000	1.40935	1.56	4.4276
209	-0.00497811	0.00311597	-0.00162859	0.00609452	-0.00362494	0.00360053	0.000535752	-0.0142193	0.00342501	-0.00274283	0.00069481	0.000783735	-0.00396939	0.0776122	0.203871	0.0544794	0.335963	335962785000	3.33399	8.7301	10.4741
210	-0.00223839	0.000700888	0.000392429	0.00237816	-0.00332341	0.00118816	0.00516898	-0.00575235	-0.00113289	-0.000345706	-0.00291261	0.00407093	-0.000520228	0.0968055	0.0723094	0.0750377	0.244153	244152663000	5.03615	19.9204	15.8216
211	0.00251403	-0.00138934	-0.0033312	0.00439858	-0.00474646	0.000825188	-0.0043992	-0.00760638	-5.15913e-05	-0.00363987	-0.00703	-0.000839496	-0.00620568	0.0997084	0.112978	0.140752	0.353439	3.53439e+11	6.66338	34.8702	20.9337
212	0.0412266	0.0183106	0.0280457	0.0531175	-0.000161154	-0.0021395	0.000322917	0.000701285	0.00213111	-0.0024762	0.00236136	0.00246212	-0.000279592	0.0262357	0.0530859	0.0510307	0.130352	1.30352e+11	0.491849	0.19	1.54519
213	-0.0511176	0.0100811	-0.010499	0.0531495	0.00862034	0.0020026	0.00496395	-0.00835641	-0.0011461	0.00158053	0.0165807	0.0139322	-0.00173952	0.155869	0.11083	0.322524	0.589223	5.89223e+11	0.575363	0.26	1.80756
214	-0.0143717	0.000657542	0.0120808	0.0187863	0.00124102	-0.00117241	-0.0016194	-0.000405079	-0.00143263	-0.00151498	-0.00470684	0.00165937	-0.00110952	0.0403284	0.0335269	0.0747573	0.148613	1.48613e+11	1.05851	0.88	3.32542
215	-0.0205689	0.0189683	0.00749101	0.0289654	-0.0146238	0.0159368	0.0140431	0.0022553	0.0457442	0.00081896	-0.0316565	-0.00150184	0.0146952	0.446037	0.488184	0.478535	1.41276	1412755760000	2.30421	4.17	7.23891
216	0.000309404	-0.0112703	0.00615277	0.0128441	-0.0010594	0.00069663	0.000616301	-0.00149916	0.00074543	0.000156079	8.34537e-05	0.000389313	0.000955964	0.0237233	0.0240067	0.0142873	0.0620173	62017252300	2.63905	5.47003	8.29083
217	0.00981173	-0.00432206	0.0158588	0.0191429	-0.000380632	-9.79664e-05	0.000514511	-0.000509142	0.000258588	0.000348988	-0.000221863	4.82172e-05	0.000361275	0.0099311	0.0111672	0.00631356	0.0274118	27411841500	0.374241	0.11	1.17572
218	0	0	0	0	0.000463377	-0.000724873	-0.00213657	0.00118411	-0.000907095	-0.00258125	-0.000345204	0.00122579	-0.000125944	0.0332482	0.0467246	0.0169694	0.0969422	9.69422e+10	0.319154	0.08	1.00265
219	0.0135289	-0.0234209	0.00380792	0.0273143	-0.00237655	-0.00843085	0.000933428	-0.00352294	0.0268618	-9.52733e-05	0.0188205	-0.00245841	0.00340313	0.117408	0.3048	0.246821	0.66903	6.6903e+11	0.866725	0.59	2.7229
220	0.00400739	-0.0123903	0.00187775	0.0131569	0.000154069	-0.00129044	-0.0054325	0.00327554	-0.00063856	-0.00143633	0.000605381	0.000218561	-0.000283466	0.0687701	0.0535043	0.0110741	0.133349	1.33349e+11	0.71365	0.4	2.242
221	0.00171987	0.00190227	-0.00226627	0.00342236	-0.00287264	0.010952	0.0188576	0.000909105	-0.0076535	-0.00643981	-0.00856903	-0.00379626	0.00482498	0.326823	0.150024	0.171903	0.64875	648749569000	6.88805	37.2597	21.6395
222	-0.00903179	0.00372996	0.000802098	0.00980455	-0.00218531	-0.00297309	0.00180647	0.000473555	0.000363681	-0.000425342	-0.000312647	-7.58147e-05	0.000699263	0.0696487	0.0126258	0.0108772	0.0931517	9.31517e+10	3.7339	10.9502	11.7304
223	-0.00190268	0.00150152	-0.00283436	0.00372939	-0.0146896	-0.00865413	0.000493987	-0.0355188	0.0106025	-0.0122019	0.0137096	-0.0167232	-0.0349778	0.238377	0.583231	0.654105	1.47571	1.47571e+12	1.37736	1.49	4.32713
224	0.000256463	0.040187	-0.00749719	0.0408811	-0.00707288	-0.0103086	-0.0143362	0.0211571	0.00914256	0.0123648	0.00489038	-0.00400729	0.00220684	0.317176	0.426645	0.111045	0.854866	8.54866e+11	2.51302	4.96002	7.89491
225	0.00253995	0.00600634	-0.000825498	0.00657335	0.00636058	0.00177207	-0.00541261	-0.00322792	-0.00251557	0.00607198	0.00399044	-0.00405603	-0.000285366	0.135453	0.118155	0.0833184	0.336926	336925759000	3.75267	11.0602	11.7894
226	0.100065	-0.0868276	-0.0927313	0.161713	-0.00026203	-0.000442442	0.000669511	-0.00103227	0.000140444	-0.000139285	-0.00176306	0.000215044	-1.17438e-05	0.0137398	0.01312	0.0198984	0.0467583	46758254400	0.586323	0.27	1.84199
227	0.000505862	0.0048935	0.00611892	0.00785133	0.00123701	5.71358e-05	-0.00179984	-0.00189501	-0.00188797	0.00332293	0.00190958	0.000485051	-0.00193678	0.0309398	0.0710591	0.0433141	0.145313	145313009800	1.51808	1.81	4.7692
228	0.00181533	-0.00857403	-0.00454709	0.00987347	-0.000411282	-0.000771217	0.00249291	0.00048393	-3.44316e-05	-0.00211258	-0.00152701	0.00157457	0.000173683	0.0367541	0.0263094	0.0327527	0.0958162	9.58162e+10	1.27661	1.28	4.01061
229	-0.0045809	0.0107312	-0.010505	0.0157003	0.0092774	-0.0051344	-0.00330583	-0.0199919	-0.0115009	-0.00671067	0.0149257	0.00567626	0.00739348	0.177176	0.382035	0.279955	0.839165	839165430000	3.45954	9.40012	10.8685
230	0.0102822	0.00511679	-0.00592409	0.0129228	0.013832	0.00752804	-0.0157477	-0.035265	-0.0196233	0.0377326	-0.00110013	-0.00293566	0.00701906	0.371077	0.926209	0.110549	1.40783	1407834390000	2.77548	6.05004	8.71944
231	0.00306811	0.0102011	0.0080307	0.0133404	0.000210202	-0.00128922	-0.00315742	0.00229021	-0.00238861	-0.00232127	0.00171199	0.000983652	0.000707657	0.0465684	0.070001	0.0340329	0.150602	1.50602e+11	0.541152	0.23	1.70008
232	-0.00413693	-0.00257182	0.00424949	0.00646425	0.000335362	-0.00257459	0.000112978	-0.00266295	-0.000254863	0.00358923	-0.00100312	0.00418806	-0.000314909	0.0302293	0.0650704	0.0550609	0.150361	150360609000	1.45819	1.67	4.58104
233	-0.000879606	-2.41404e-05	0.00158525	0.00181309	0.00121672	-2.1067e-05	-0.00406551	0.00354345	-0.000259505	0.00514675	0.000442149	0.00325736	0.00631865	0.053033	0.089497	0.100182	0.242712	242711568200	8.50748	56.8365	26.7271
234	0.00590203	0.00810888	0.00289602	0.0104391	0.00342147	0.000534899	0.00258968	-0.0021584	0.00486126	-0.00283795	0.00109081	-0.00186683	-0.0027153	0.0654605	0.0985761	0.0567293	0.220766	220765991000	1.15624	1.05	3.63245
235	0.00073333	0.00178632	-0.00461755	0.00500504	0.00485426	0.00202865	-0.000627921	0.00697834	0.000454939	0.0029855	-0.0113256	-0.00073346	0.00141753	0.0751083	0.104188	0.134766	0.314063	314062570000	4.78212	17.9603	15.0235
236	0.0032229	-0.00498443	-0.00311632	0.00670396	0.001506	0.000246321	-0.00178686	-0.000946633	0.00377299	-0.00011405	-0.00158544	0.00297031	-0.00122975	0.0353919	0.0483367	0.057855	0.141584	141583606000	0.541152	0.23	1.70008
237	-0.000486275	0.020623	0.00322518	0.0208793	-0.00528659	-0.00271233	0.00374717	0.0108233	0.0039364	-0.00177585	-0.0276555	-0.00905402	0.00189935	0.117461	0.165355	0.386088	0.668905	668904600000	3.48706	9.55012	10.955
238	-0.000968633	0.00120379	0.0132017	0.0132918	0.00268021	-0.0023692	-0.00693028	0.000749971	-0.00280229	-0.000889978	-0.000969758	0.00372803	-0.00169338	0.119797	0.0444224	0.0639117	0.228131	228130898000	0.704672	0.39	2.2138
239	-0.000162261	0.00213039	-0.00967519	0.00990829	-0.00109336	0.000879586	-0.000610707	-0.00047069	-0.000389787	0.000330046	-0.00109036	-0.000140698	0.000132148	0.0258365	0.0119052	0.013632	0.0513738	51373763000	2.8457	6.36005	8.94004
240	-0.0061162	0.0258722	0.052272	0.0586442	-0.00124673	0.0238221	0.00749301	0.039299	0.0119789	-0.053601	-0.0381372	-0.0147173	0.0911356	0.325618	1.04879	1.4399	2.81431	2814307430000	0.813686	0.52	2.55628
241	0	0	0	0	-0.000168964	-0.000230939	-0.000671583	0.000603629	-0.000607655	-0.000631288	0.000643281	0.000368003	0.000346732	0.0107149	0.0184257	0.0135802	0.0427207	42720741000	0.298541	0.07	0.937897
242	0.165348	-0.159955	-0.122981	0.260863	-0.0215243	0.0231203	-0.0098428	-0.00607071	0.00386551	0.00539438	-0.0122066	0.00446867	-0.00853158	0.544874	0.153306	0.252068	0.950248	950248220000	1.05248	0.87	3.30648
243	-0.0011981	0.00499706	0.00624484	0.00808728	-0.00205221	0.00293666	-0.000777459	-0.000876766	0.000527706	-0.000349255	0.00680524	0.00159083	0.000958489	0.0576633	0.0175373	0.0935455	0.168746	168746073000	2.65111	5.52003	8.32874
244	0	0	0	0	0.000251672	-0.000109641	-0.000171784	-4.86356e-05	0.000681255	-0.000431385	0.000591096	-0.000331597	-7.64125e-05	0.00533097	0.0116128	0.00999105	0.0269348	26934787100	0.319154	0.08	1.00265
245	0.000545093	-0.00220953	0.00993646	0.0101937	-9.53528e-05	-0.00324287	-0.00243733	9.30687e-05	0.00208895	0.00139151	0.00477693	-0.00138096	-0.00171413	0.0577556	0.0357353	0.0787202	0.172211	172211085100	2.21692	3.86	6.96467
246	-0.00161486	-0.000567653	0.00415869	0.00449719	0.0120125	0.00932046	0.0056082	-0.0112695	-0.00909024	-0.00418812	-0.0163204	-0.0100794	-0.0137359	0.269411	0.245479	0.401356	0.916246	9.16246e+11	2.77548	6.05004	8.71944
247	0.00243038	0.00759036	0.0106297	0.0132858	0.00188989	-0.00299879	-0.00375024	0.00370879	0.000349135	-0.00477304	0.00704844	0.00349655	-0.000634967	0.0863892	0.0883097	0.1118	0.286498	286498432000	0.722515	0.41	2.26985
248	0.00202638	-0.00755614	0.0134502	0.0155599	0.00181904	-0.00122172	-0.00189024	-0.00132352	0.000239945	-0.00238519	-0.00130915	0.00563145	0.000805855	0.0493099	0.0394865	0.0774645	0.166261	166260882000	0.451352	0.16	1.41797
249	0.00125705	0.00358943	0.000620525	0.00385348	0.00222274	-0.000261858	-0.00156001	-0.000624759	0.0031985	0.000588195	-0.00169001	-0.000480156	-0.00288165	0.0404462	0.0441146	0.0505182	0.135079	1.35079e+11	1.96415	3.03	6.17058
250	0.000484034	-0.00187769	0.00464386	0.00503244	-0.00400728	-0.000257695	0.00339529	0.00185337	-0.00472348	-0.00180842	0.00219092	-0.00179333	0.00272091	0.0766026	0.0838528	0.0670515	0.227507	227506871000	2.50033	4.91002	7.85502
251	-0.00280258	0.00190068	0.0044619	0.00560139	-0.00731522	0.00276031	-0.00412191	0.0016001	-0.00582823	0.0102278	0.0029992	0.00978021	0.00655841	0.141974	0.176562	0.193378	0.511914	511914090000	4.27747	14.3702	13.4381
252	0.016919	-0.00567478	0.061803	0.0643278	-0.00154144	-0.00138672	0.0194026	-0.0176061	0.0342583	0.00827213	0.0209222	-0.0280503	0.00382943	0.223307	0.601365	0.528019	1.35269	1352691540000	1.11132	0.969999	3.49133
253	-6.25103e-05	0.000518743	0.0113763	0.0113883	-0.00113643	-0.0028286	0.00220427	0.00119675	0.000135783	-0.000525695	-0.00212589	0.00285971	0.00285071	0.061693	0.0185823	0.0783631	0.158638	1.58638e+11	1.43175	1.61	4.49799
254	-0.000290285	-0.00385869	-0.00441672	0.00587207	-0.000598677	0.00024965	0.00115647	0.00348984	-0.000104471	-0.00344318	0.00230737	0.00296101	0.00124947	0.020048	0.070375	0.0651785	0.155601	155601412000	3.12095	7.65008	9.80479
255	0.0119796	0.0289008	-0.0251419	0.0401358	0.00531043	-0.0003873	0.00634309	0.00753008	-0.00172195	0.00320786	-0.0131923	0.0020889	-0.0208043	0.120408	0.124599	0.360856	0.605863	605862693000	3.10867	7.59008	9.76619
256	-0.0018314	0.00971862	0.00758352	0.0124626	-0.000110383	0.000164982	0.00234377	0.000596224	-0.00284636	0.000780616	0.00259421	-2.53758e-05	0.000144796	0.0261914	0.042232	0.0276439	0.0960673	96067250500	2.30421	4.17	7.23891
257	0.0139821	-0.00244513	-0.00148883	0.0142721	-0.000351772	-0.000189148	-0.00366539	1.74313e-05	-0.00252863	-0.00143425	0.00276777	-0.00416917	0.00486628	0.0420631	0.0398031	0.118032	0.199898	199898469600	0.451352	0.16	1.41797
258	0.000712497	-0.00330657	-0.0039647	0.00521152	0.000557664	-0.00253282	-0.00158298	0.0023203	0.000617681	-0.00127248	0.00181202	-0.000539582	-0.000200749	0.0467346	0.0421046	0.0255235	0.114363	114362787000	2.0248	3.22	6.36112
259	-0.00110497	0.00175749	-0.000416415	0.00211734	-0.000362122	0.00259844	0.00159343	-0.0029746	0.000159643	-0.000791041	0.00183934	-0.0010488	-0.000479137	0.04554	0.0392529	0.0336727	0.118466	1.18466e+11	2.23122	3.91	7.00959
260	-0.00336212	0.00211729	0.000454619	0.00399919	-0.000378182	0.00138396	-8.46178e-05	0.00146539	0.00168554	-0.000581986	0.000979596	-0.00114856	0.00136835	0.0184676	0.0373292	0.034965	0.0907618	90761828900	2.14392	3.61	6.73534
261	-0.000436955	-0.000343911	0.000736866	0.000923134	0.00225799	0.000389814	0.000219754	0.00207986	-0.00119401	5.71063e-05	-0.00569784	0.00118403	0.000420665	0.0286756	0.0333098	0.0730253	0.135011	1.35011e+11	2.30421	4.17	7.23891
262	-0.00226873	0.00803691	0.00456065	0.00951518	0.000435301	-0.00189961	0.0024589	0.000613351	0.00120495	-0.000535365	0.000173505	0.00193056	-0.000262241	0.0479381	0.0235366	0.023663	0.0951378	9.51378e+10	1.51388	1.8	4.75601
263	0	0	0	0	0.00601012	-0.00260986	-0.00228537	-0.000720147	-0.0024456	-0.00221714	0.00166041	-0.00105661	0.00185373	0.109054	0.0538289	0.0457074	0.20859	2.0859e+11	0.422201	0.14	1.32639
264	-0.000174051	0.00313882	-0.00219525	0.00383426	5.01333e-05	-0.00455405	0.00128934	-0.00102813	0.00399735	-0.00127446	0.00199122	-0.00524101	0.00328311	0.0589352	0.0629993	0.105153	0.227088	227087913300	1.7948	2.53	5.63854
265	0.00584914	-0.0179787	-0.016825	0.0253086	-0.0230466	0.0074768	-0.000684742	0.00442421	-0.0118561	0.0152917	-0.0121339	0.0201269	0.00531637	0.312081	0.31572	0.375771	1.00357	1.00357e+12	2.30145	4.16	7.23024
266	0.00419275	-0.000208114	-8.60172e-05	0.0041988	0.00100157	0.00174282	-0.0010962	-0.00194776	-0.000478108	-0.000831503	-0.0013159	-0.000446015	-0.000405619	0.0384059	0.0325737	0.0216754	0.092655	9.2655e+10	1.40935	1.56	4.4276
267	0.00164952	0.00219086	0.00163119	0.00319085	0.00182526	-1.07587e-05	-0.00071988	-0.00173403	0.00110858	-9.7001e-06	0.00118894	0.000462098	-0.00110551	0.025559	0.0285231	0.0275656	0.0816477	81647658010	2.43846	4.67001	7.66068
268	0.00255641	-0.0011297	0.00132708	0.00309396	-0.00732307	0.00123666	0.000671048	-0.0186863	-0.00323709	-0.00515908	0.0313952	0.00156182	0.00172256	0.0923077	0.270825	0.346796	0.709929	709928967000	2.64148	5.48003	8.29847
269	-0.00294792	0.00756657	-0.00654182	0.0104278	0.000635777	-0.000588121	-0.00100714	0.00289015	-0.00173884	-0.00316254	0.0010915	-0.00294305	0.000729849	0.0223104	0.0779153	0.0476441	0.14787	1.4787e+11	0.930485	0.68	2.92321
270	-0.00128531	0.0042523	0.0123569	0.0131311	-6.51131e-05	0.00149373	0.00121746	-0.0010493	0.00188021	0.00240806	-0.00267891	-0.0021718	-0.00312561	0.027763	0.0533758	0.0797632	0.160902	1.60902e+11	0.756939	0.45	2.378
271	0	0	0	0	-0.00709778	-0.0330679	-0.0119052	0.0191642	0.0167509	-0.00511045	0.0175444	0.00804095	-0.0159121	0.520709	0.410255	0.414974	1.34594	1.34594e+12	2.46959	4.79002	7.75848
272	-0.0026894	-0.00249646	-0.0026721	0.00453931	0.000940518	8.44454e-05	0.000717997	-0.00053024	-0.00122065	1.23378e-05	0.000466797	0.000738637	0.000646796	0.0174296	0.0176322	0.0185223	0.0535841	53584141300	2.0498	3.3	6.43966
273	-0.000333842	-0.000146138	-0.000537645	0.000649515	-0.00632251	0.00408869	-0.00385431	0.0104327	0.00203542	-8.15079e-05	0.00542848	0.0134612	-0.00872745	0.142655	0.125497	0.276171	0.544323	5.44323e+11	2.98328	6.99007	9.37227
274	0.00458616	-0.00122401	0.00524369	0.00707301	0.00472034	-0.00174303	3.77097e-05	-0.000278372	0.00129968	-0.00133253	-0.00471909	0.00177467	-0.00472326	0.0650108	0.0291057	0.11217	0.206287	2.06287e+11	1.40028	1.54	4.39913
275	0.00122337	0.000658042	0.00117786	0.00182127	-0.00116691	0.00248214	0.00158047	0.0020222	-0.00200916	0.00214925	0.00165222	-0.000745573	-0.000178988	0.0522952	0.0618061	0.0257678	0.139869	139869097000	2.24544	3.96	7.05427
276	0.00560563	-0.00943986	-0.000565828	0.0109934	0.000431685	0.000771731	0.00207105	0.00075642	0.00190244	0.00269556	-0.000556627	0.000507443	0.00019708	0.0327446	0.0535441	0.0126115	0.0989003	9.89003e+10	1.06451	0.889999	3.34427
277	0.00352229	-0.00075322	0.00031197	0.00361541	0.00231924	-0.000282607	-0.000712167	0.00246778	-0.00219152	-0.000329677	-0.00318124	0.00503456	-0.000598575	0.0331401	0.0498897	0.0881437	0.171174	1.71174e+11	1.0823	0.919999	3.40017
278	-0.0032526	0.00334033	0.00265156	0.00536358	-0.000723758	-0.00311052	0.00174293	0.0064145	0.00172136	-0.00220296	0.0012924	0.0117766	0.00257988	0.055772	0.103388	0.156488	0.315649	315648695000	0.586323	0.27	1.84199
279	0.000129057	-0.0157705	-0.00601765	0.0168801	0.0015823	-0.000245428	-0.00023118	0.00184228	-0.000930708	-0.000333319	0.000294561	0.00166899	-0.00194147	0.0205891	0.0310631	0.0390502	0.0907023	90702318000	1.38658	1.51	4.35607
280	-0.00614819	-0.00610733	0.00417099	0.00961753	-0.00101207	0.000110165	-0.0010032	-0.000158786	-0.00308538	0.00115587	-0.00176218	-0.00201371	0.00171071	0.0212544	0.0440003	0.054866	0.120121	120120723000	0.881292	0.61	2.76867
281	-0.000996153	0.00490774	-0.00150801	0.00522994	0.000604023	-0.0112635	0.000287348	-0.0112027	-0.0393083	0.00471152	0.00523295	0.010345	-0.00524576	0.121549	0.552225	0.208238	0.882011	8.82011e+11	3.42439	9.21012	10.7581
282	0.00310434	-0.00260006	0.00821343	0.00915738	-0.00576916	-0.00538531	-0.00509522	0.00923852	0.0175919	-0.00434822	-0.00125774	-0.00205945	0.00444938	0.162497	0.311787	0.0776657	0.551949	551949330000	3.518	9.72013	11.0521
283	0.0035999	0.00306387	-0.00119632	0.00487624	0.00325619	0.00129858	-0.0100224	0.0218319	0.0133493	0.0385743	-0.0141215	0.0022821	0.00179844	0.145771	0.737555	0.18202	1.06535	1.06535e+12	1.63907	2.11	5.1493
284	-0.000428087	-0.00246221	0.000559092	0.00256092	0.00263351	0.00748211	-0.003039	0.00069904	-0.00223059	0.00131582	0.000713101	-0.00246141	0.00273057	0.131546	0.0424545	0.0590508	0.233052	233051531000	1.39573	1.53	4.38481
285	0.00495355	-0.00159547	-0.00545282	0.00753767	0.00014133	0.00149924	-0.002288	-0.00124554	0.00368473	-0.000178577	-0.00124046	-4.73618e-05	-0.00190999	0.0392858	0.0510885	0.0319782	0.122352	122352417500	1.68124	2.22	5.2818
286	0.00919754	-0.00123713	0.00101209	0.00933539	0.00075107	-0.00180156	-0.00215785	-0.000767807	0.000884681	0.00164828	-0.00167034	-0.00131524	-0.00212768	0.0471048	0.0330077	0.0511325	0.131245	1.31245e+11	1.56353	1.92	4.91198
287	-0.000996539	0.00353154	0.00508282	0.00626897	-0.000936412	0.00482475	-0.0025499	-0.00492462	0.00114818	-0.00584783	-0.000735424	0.000362611	0.0080535	0.0831107	0.119206	0.0915154	0.293832	293832312000	0.923618	0.67	2.90164
288	0.00197222	-0.000180557	-0.00521455	0.00557798	-0.0116895	-0.0277735	0.0150787	-0.0354479	-0.00467168	0.00370609	0.0482546	-0.00980683	-0.0578465	0.545416	0.438257	1.15908	2.14275	2.14275e+12	2.25676	4	7.08984
289	-0.0159481	0.023641	0.0049062	0.0289363	0.00153585	0.000203445	0.00133625	0.00194888	-0.00109465	0.000285382	-0.00189412	-0.000643034	-0.00258552	0.0307554	0.033289	0.0512268	0.115271	115271243000	0.909729	0.65	2.858
290	-0.00174383	0.00240101	-0.00332603	0.00445738	0.000422981	-0.000813566	-0.00169537	0.00172327	-0.000822106	-0.00125604	-0.000542397	-0.000323192	-0.00134687	0.0293192	0.0380142	0.0221246	0.089458	89457967000	1.16174	1.06	3.64971
291	0.0149232	-0.00556786	-0.000910314	0.015954	-0.000328407	0.00152701	0.00103138	-0.000733388	0.000891183	-0.002667	-0.000766802	0.00216503	-0.000590757	0.028868	0.0429157	0.0352258	0.10701	107009506000	1.01554	0.809999	3.19042
292	-0.000320063	0.000319562	7.21349e-05	0.000458	-0.00380302	-0.00850293	0.00457345	0.00430432	0.00140043	-0.00256641	-0.000218537	-0.00820554	0.00296249	0.168794	0.0827115	0.113866	0.365371	365371323000	3.86623	11.7402	12.1461
293	-0.00330853	0.000262741	0.000943759	0.00345052	0.000679019	-0.000890134	0.0025937	0.000243702	-0.000737252	0.000535525	0.000270844	-0.00091358	-0.0027033	0.0416285	0.0151648	0.0388773	0.0956706	95670583000	1.41385	1.57	4.44176
294	-0.000394556	-0.00232905	-0.000320303	0.00238385	-0.00168465	-0.000923649	-0.000397203	0.00282448	0.00176183	-0.00164067	0.000241549	-0.0012496	-0.00257763	0.030055	0.0622698	0.0406879	0.133013	1.33013e+11	1.62345	2.07	5.10024
295	1.15488e-05	-0.000122935	-0.000936554	0.000944658	0.0118217	0.00149573	-0.0150044	0.00394281	-0.000841148	-0.00532495	0.000879873	0.00269296	-0.0124946	0.283218	0.101089	0.160674	0.544981	5.44981e+11	1.27661	1.28	4.01061
296	0	0	0	0	-0.000171608	-0.00141583	0.00422775	0.000331592	-0.00161416	0.00499722	0.000260256	-0.000539536	0.00175388	0.0581518	0.0694297	0.0255367	0.153118	1.53118e+11	0.225676	0.04	0.708983
297	0.00150436	-0.00192143	0.00274078	0.00366972	-0.00301086	-0.0109969	-0.00396867	0.0227303	-0.0019715	-0.04143	-0.0017032	0.00223494	0.0201196	0.179764	0.661317	0.240578	1.08166	1081659130000	1.11132	0.969999	3.49133
298	0.00574339	-0.000471208	-0.00530968	0.0078359	-0.000230359	-0.000292473	-0.000835511	0.00172032	-0.00168675	-0.0025172	-0.00103561	0.000534623	0.00104922	0.0135834	0.0592427	0.0261945	0.0990207	9.90207e+10	0.374241	0.11	1.17572
299	-0.000531597	0.00149752	-3.71443e-06	0.00158908	0.00432578	0.00073918	0.00198576	0.00194619	0.00548006	0.00661617	-0.00242054	0.00321932	-0.00206759	0.0705071	0.140424	0.0770744	0.288006	288005834000	1.69257	2.25	5.31737
300	0.00888602	0.00660444	0.00869991	0.0140808	0.00524197	0.00175655	-0.0013771	-0.00274591	-0.00109915	0.00103171	-0.0044739	-0.000559832	0.001483	0.0837561	0.0487676	0.0651674	0.197691	197691081000	0.996558	0.78	3.13079
301	-0.0204824	0.00702539	-0.0247837	0.0329107	-0.00102839	0.00192352	0.00374014	-0.000429558	-0.00134726	0.00171739	0.00184943	0.00218676	-0.0027761	0.0669205	0.0349421	0.0681229	0.169986	1.69986e+11	0.983697	0.76	3.09038
302	0.00190538	0.000190541	-0.00676065	0.00702661	-0.000747678	0.0023947	-0.0028413	0.00687385	0.00229258	0.00671357	-0.00069136	-0.00358894	0.00138894	0.0598367	0.1588	0.0566925	0.275329	275329169000	1.33034	1.39	4.17939
303	-0.0169277	-0.0161118	-0.00138118	0.0234103	-0.00635554	0.00554832	-0.0110561	-0.00651173	0.0142424	-0.0195611	-0.00252025	0.00700405	-0.00989771	0.229599	0.403152	0.19422	0.826971	826971080000	0.739927	0.43	2.32456
304	-0.000408552	0	0	0.000408552	0.0029826	0.00151268	-0.00233159	0.00158025	-8.99654e-05	0.00080447	-0.00287257	0.00108888	0.00249776	0.0682687	0.0247469	0.0645921	0.157608	157607625000	0.69558	0.38	2.18523
305	-0.00300715	0.00588985	-0.000365351	0.0066232	0.00476968	0.00167194	0.0018124	0.00557998	0.0021798	0.00169841	0.00273898	-0.00221222	-0.000128535	0.0825401	0.0945819	0.0507974	0.227919	227919416000	0.781764	0.48	2.45599
306	-0.00496329	0.0542519	-0.226437	0.232898	0.0203916	-0.00582778	0.00649995	-0.00533529	0.00260155	0.0149662	0.014452	0.0022423	-0.000567402	0.327194	0.229031	0.172617	0.728842	7.28842e+11	0.851907	0.57	2.67635
307	0.0262217	-0.0104646	-0.0144416	0.0317119	-0.00242576	0.00728397	0.00283677	0.00140256	0.0123765	0.0018017	-0.00595809	-0.00024161	0.00252302	0.125465	0.155808	0.0872272	0.3685	3.685e+11	0.225676	0.04	0.708983
308	0	0	0	0	-0.0109184	-0.0266181	-0.0327549	0.0111475	0.036577	-0.0131678	-0.0113728	-0.0330415	0.0328881	0.702915	0.608922	0.773025	2.08486	2084861900000	0.677027	0.36	2.12695
309	0	0	0	0	2.75535e-06	-0.000685458	5.1646e-05	-0.00241954	-0.00709125	0.00145341	-0.00151433	-0.00299928	0.000395588	0.00739859	0.109642	0.049092	0.166133	166132612360	0.56419	0.25	1.77246
310	0	0	0	0	0.00370259	0.00166371	0.00239538	0.00524354	0.00105006	-0.00270593	-0.00108992	0.00226929	0.00110307	0.0776168	0.0899952	0.0446227	0.212235	2.12235e+11	0.451352	0.16	1.41797
311	0.00145757	0.000341544	-0.00197158	0.00247554	0.00456103	-0.0043092	-0.00214251	-0.00118447	-0.000503206	-0.000744425	0.00115409	-0.00460076	0.000584315	0.110127	0.024321	0.0633916	0.19784	1.9784e+11	0.541152	0.23	1.70008
312	0.00694959	-0.132227	0.00413894	0.132474	0.00123976	0.00419832	-0.000498161	-0.000289853	-0.000885168	7.56283e-05	-0.000793742	-0.00193152	-0.000214837	0.0593624	0.0125065	0.029401	0.10127	101269944300	0.356825	0.1	1.121
313	0	0	0	0	0.000276353	0.000164093	3.45848e-05	-7.1948e-05	-0.000111712	-2.6487e-05	-9.94372e-05	-9.39428e-05	6.61595e-05	0.00475031	0.00210147	0.0025954	0.00944718	9.44718e+09	0.319154	0.08	1.00265
314	0	0	0	0	0.0203235	0.00183536	-0.0300317	-0.00270162	0.00542388	0.0127003	-0.0135634	-0.00437081	0.00828862	0.521906	0.208258	0.262228	0.992392	992392340000	0.338514	0.09	1.06347
315	0	0	0	0	0.00355104	-0.00153516	0.00202519	7.85554e-05	0.000188427	0.000220249	0.00369021	-0.00215967	0.00165974	0.0711138	0.00487232	0.0750962	0.151082	151082376100	0.225676	0.04	0.708983

## Sheet: CMT16-12_SIII_0.06
																	Min	89810859000
	CMT-16-12_SIII 0.06 step size	One point per grain	Average	0.0651278													Average	4.49663e+11
	nb grains =	48	Median	0.00858008													Median	3.49483e+11
Grain	q13	q23	q33	rqtotal	ac11	ac12	ac13	ac21	ac22	ac23	ac31	ac32	ac33	rac1j	rac2j	rac3j	rac total	rac total	grain size	grain surface	grain perimeter
ID	(in mm-2)	(in mm-2)	(in mm-2)	(in mm-2)										(in mm-2)	(in mm-2)	(in mm-2)	(in mm-2)	(in m-2)	mm	mm2	mm
1	0.00397201	-0.00042669	0.0653609	0.0654829	-0.010819	0.0102349	-0.0242734	-0.00462976	0.00182171	-0.0120508	0.00662423	0.0016726	0.0223709	0.453273	0.185023	0.306677	0.944973	944972660000	0.829186	0.54	2.60497
2	-0.000713593	-0.00207342	0.00497171	0.0054338	0.00210861	4.34611e-05	0.00490909	0.00306211	-0.000645589	0.00550313	-0.0064015	0.00259462	-0.0102207	0.0706115	0.0921083	0.192168	0.354888	3.54888e+11	4.12988	13.3958	12.9744
3	-0.185336	0.00685945	0.032364	0.188266	-0.00515253	0.00879637	0.00220898	-0.00965597	0.00844382	-0.00150215	-0.00993252	0.00257381	0.000540681	0.161579	0.196019	0.13047	0.488068	488068304000	0.376953	0.1116	1.18424
4	0.279524	-0.00365713	-0.818144	0.864585	-0.0386998	0.0022331	-0.0439892	-0.0123358	0.0341533	-0.0188659	0.0193549	-0.00761876	0.0608911	0.849221	0.65355	0.878647	2.38142	2381418520000	0.244106	0.0468	0.766883
5	0.00421362	-0.00250031	0.000471541	0.00492225	-0.00330841	-0.00356851	0.00436695	-0.0052304	-0.00450309	0.00598313	-0.0102003	-0.00264735	0.00728529	0.112439	0.157166	0.201329	0.470934	470934080000	1.9399	2.95557	6.0944
6	0.00027966	0.00565273	-0.00447199	0.0072132	0.00203712	-0.0023465	0.000550266	0.00530762	-0.00342386	-0.000542981	0.00231662	-0.00262768	-0.000210776	0.0493389	0.0927446	0.0515508	0.193634	1.93634e+11	1.1648	1.0656	3.65933
7	0.00116188	-0.000612527	-0.0121367	0.0122076	0.000751541	-0.00187606	0.00100415	0.0131586	0.00715507	0.0139458	0.00342233	0.00424906	0.00459155	0.0363175	0.342595	0.122629	0.501542	5.01542e+11	2.15268	3.63955	6.76286
8	-0.020434	-0.531065	0.00384587	0.531471	0.000382418	-0.000224459	0.00418262	0.00857383	0.00190408	-0.00310358	0.0063425	0.000549041	0.0096858	0.047895	0.135815	0.165773	0.349483	3.49483e+11	0.135406	0.0144	0.42539
9	-0.0010846	0.00259706	0.000336406	0.00283447	-0.00669572	-0.0107768	0.00320424	0.00347647	0.00680912	-0.00254502	-0.00914853	-0.011956	0.00622431	0.206768	0.128306	0.273288	0.608362	608361650000	1.7074	2.28959	5.36396
10	-0.00162197	0.00380519	0.0120993	0.0127869	0.0121343	-0.00182594	-0.00118861	-0.00560103	-0.00162314	0.00147635	0.0272978	0.00897519	-0.000717891	0.151488	0.0870052	0.369909	0.608402	6.08402e+11	2.44289	4.68716	7.67458
11	-0.00451466	-0.00820984	-0.00896083	0.0129646	-0.00772532	0.0127333	-0.0084396	0.00973451	0.00827635	-0.00319804	0.00572345	-0.00786586	0.0293965	0.288982	0.212089	0.429858	0.930929	930928790000	0.845606	0.5616	2.65656
12	-0.0135229	0.00875787	-0.0267744	0.031248	-0.00215215	-0.00251937	0.00530986	0.0037597	0.00633025	-0.00137629	0.00684737	0.0036176	-0.000244473	0.0998138	0.114662	0.107094	0.321571	321570574000	0.759962	0.4536	2.3875
13	-0.00135784	-5.9356e-05	-1.07911e-05	0.00135918	0.00387789	-0.000605006	0.000149922	-0.00597589	0.00186268	-0.000512261	0.00377895	0.00301404	-0.000772798	0.0463282	0.0835083	0.0756579	0.205494	2.05494e+11	0.976424	0.7488	3.06753
14	0	0	0	0	7.31184e-05	0.00309524	0.000894028	2.46686e-05	0.000519998	-0.000731695	-8.51009e-05	-0.00191084	0.00229365	0.0406239	0.0127636	0.0428959	0.0962834	96283390100	0.117265	0.0108	0.368398
15	-0.000416304	0.000556038	0.000132345	0.000707108	0.000399743	0.000181472	0.000413381	-0.00269131	0.000326763	0.0016522	0.00307218	0.00122759	0.00335412	0.00994596	0.0467027	0.0765389	0.133188	1.33188e+11	14.2087	158.571	44.6379
16	-0.0349227	0.0171926	0.00758428	0.0396573	0.000559607	-0.0021464	-0.00041022	0.002987	-0.00330876	-0.000952688	-0.00839166	0.00394139	0.000877752	0.0311622	0.0724845	0.132108	0.235755	2.35755e+11	0.443957	0.1548	1.39473
17	0.0471849	-0.686433	0.159713	0.706346	0.00779139	0.0106111	0.00441824	-0.0049133	-0.0113969	-0.0103289	0.0121594	-0.0027679	0.0116915	0.228208	0.266391	0.266188	0.760787	760786610000	0.117265	0.0108	0.368398
18	-0.0053269	0.00257268	-0.00634854	0.00867748	0.0078698	-0.00721088	0.00978603	-0.00303296	0.00349558	0.00322918	0.00515649	0.0098955	0.000547132	0.248667	0.0975772	0.155991	0.502235	502235428000	1.09377	0.9396	3.43619
19	-0.0112725	0.00746571	0.00399794	0.0140993	0.00654737	-0.010638	0.0193943	-0.0248109	0.0218723	0.00831287	-0.00577818	-0.0482345	0.0108126	0.365797	0.549961	0.648253	1.56401	1.56401e+12	1.70471	2.28239	5.35552
20	-0.00816733	0.00305399	0.000455209	0.00873151	-0.00642441	0.00160438	0.00595345	-0.00251226	-2.66615e-05	0.00822971	8.67611e-05	0.00468391	0.00287815	0.139822	0.107686	0.0764882	0.323997	3.23997e+11	0.874914	0.6012	2.74863
21	0.0189257	0.0383915	-0.00485771	0.0430776	-0.000767543	-0.00786479	-0.00547769	-0.00083557	-0.0134459	-0.0092694	-0.00222235	0.0229352	0.0146524	0.1411	0.235509	0.398099	0.774708	7.74708e+11	0.478731	0.18	1.50398
22	0.00144791	-0.00322152	0.000528718	0.0035713	0.00364879	0.00165149	-0.00178979	0.00215129	-0.00230675	-0.0044018	-0.000609067	0.00399193	0.00233438	0.0709007	0.0885983	0.0693538	0.228853	228852750000	1.14696	1.0332	3.60329
23	-0.000221489	0.00509729	-0.00159279	0.00534494	0.00086301	-0.002024	0.00765816	-0.00339483	-0.00497105	0.00358687	-0.00198139	0.0016637	0.00890934	0.105452	0.119528	0.125544	0.350524	350523646000	2.87794	6.50522	9.04133
24	0.00403933	0.0031789	0.0123796	0.0134043	0.000760222	0.00601669	0.00149532	0.00120759	0.00475542	-0.000787622	-0.00339706	0.000354616	0.000805105	0.0827223	0.0675063	0.0455678	0.195796	195796367000	0.716499	0.4032	2.25095
25	0.0762665	0.0668071	0.173636	0.20107	-0.00359509	0.00127718	0.000700464	0.00183355	-0.00068514	-0.00169968	0.000273744	0.00190824	0.000191748	0.0557273	0.0421837	0.0237373	0.121648	1.21648e+11	0.295109	0.0684	0.927116
26	-0.00185332	0.00114769	-0.002333	0.00319294	-0.000601165	-0.00439629	0.00365943	0.00124973	-0.000983453	0.00423515	0.00132027	0.00208731	0.000400372	0.0865689	0.0646833	0.0380796	0.189332	189331763000	3.65465	10.4906	11.4815
27	0.00629917	-0.0331296	-0.00588241	0.0342323	0.00402891	-0.00187635	0.00447871	-0.00172206	0.0034547	0.000933024	0.00406146	0.0048798	-0.00267683	0.10384	0.0610978	0.116181	0.281118	281118418000	1.02453	0.8244	3.21867
28	0.00208125	0.00478226	0.00037174	0.00522874	-0.00430098	0.00396687	-0.00307219	0.00376462	0.00277998	-0.0054617	-0.0010547	-0.00273948	-0.00556055	0.1134	0.120063	0.0935473	0.327011	327010810000	1.73271	2.35799	5.44348
29	-0.00343075	0.00477673	0.00199348	0.00620976	0.00442299	-0.000587539	-0.00317003	0.00090779	-0.0005741	0.000839692	-0.00424624	0.000306319	-0.00436736	0.0818057	0.0232158	0.0891992	0.194221	1.94221e+11	1.04227	0.8532	3.2744
30	-0.000388078	0.000766033	3.74309e-05	0.000859541	0.00385668	0.00176315	0.000946669	0.000715783	0.00132628	0.00368991	-0.00213149	-0.00060925	-0.0034799	0.065665	0.0573198	0.0622064	0.185191	185191109000	6.92951	37.7083	21.7698
31	-0.00524352	0.0391234	0.0113107	0.0410617	0.000126821	0.00117553	0.00228814	0.00155512	-0.00140106	0.000491192	0.00137234	0.000687594	-0.000534519	0.035905	0.0344738	0.0259446	0.0963233	9.63233e+10	0.582401	0.2664	1.82967
32	-8.16146e-05	-0.000167486	-0.002672	0.00267849	0.0104909	0.00236766	0.0064863	0.00290216	0.00235368	0.00312051	-0.00387068	0.00183699	-0.00366746	0.193449	0.0837635	0.0937513	0.370964	370963790000	8.07802	51.2448	25.3779
33	-0.0105952	0.00539289	0.0119723	0.0168724	-0.00283043	-0.0225229	0.00867279	0.00385235	0.000850575	-0.00373486	-0.00198762	-0.0167955	0.00847106	0.340262	0.0843779	0.272542	0.697182	6.97182e+11	2.12805	3.55675	6.68548
34	0	0	0	0	-0.00346955	-0.000673267	-0.00329729	0.00484658	0.0031481	0.00195352	0.00419251	0.00176184	0.00232781	0.0744011	0.099482	0.0828216	0.256705	2.56705e+11	0.117265	0.0108	0.368398
35	0.0114711	-0.0198172	0.0134378	0.0265496	0.00151577	-0.00193112	-0.00476373	0.000613811	-0.00490169	0.00260722	-0.000470335	0.00176937	-0.00295553	0.0821062	0.0812271	0.0519524	0.215286	2.15286e+11	0.690436	0.3744	2.16907
36	0.0177368	0.046121	0.00992325	0.0504005	0.00616018	-0.00309552	0.00302512	0.0039537	-0.000528051	-0.000286461	0.00731209	0.00830322	0.0048654	0.122808	0.0476821	0.204807	0.375297	3.75297e+11	0.338514	0.09	1.06347
37	-0.026364	-0.0165292	-0.00715178	0.0319284	0.00641715	-0.000555453	0.000442071	0.00179284	-0.00346125	-0.000341738	0.00122418	0.00381686	0.00364685	0.0741468	0.0559583	0.0868789	0.216984	216983990000	0.483494	0.1836	1.51895
38	-0.000497954	0.00372368	0.00440274	0.00578773	-0.00470236	-0.00382209	-0.00605562	-0.000858854	-0.00101222	0.00716764	-0.00540379	0.00307171	-0.00371261	0.145801	0.0903872	0.121881	0.358069	358068956000	1.98544	3.09597	6.23746
39	-0.0125119	0.00438315	0.0162264	0.0209536	0.00632129	0.00120364	-0.00297616	0.000396555	-2.71511e-07	0.000800833	0.00311212	0.000105601	-0.00124384	0.105011	0.0119766	0.0446157	0.161603	161603102112	1.31977	1.368	4.14617
40	0.00197857	-0.00289958	0.000174559	0.00351465	-0.00115748	0.0048469	0.00451244	0.00163371	0.00143981	0.0038505	-0.00105089	0.000206633	-0.00268891	0.105168	0.0692401	0.0394643	0.213873	213872667000	0.738549	0.4284	2.32023
41	0.00233857	-0.0653824	-0.023834	0.0696304	-0.0194564	0.0369944	0.00323466	-0.000591207	0.00328589	0.0202826	-0.00492174	0.00176753	-0.00915942	0.596854	0.241597	0.158487	0.996938	9.96938e+11	1.94225	2.96277	6.10178
42	0	0	0	0	-0.00145301	-0.00175925	-0.0135047	-0.00795049	-0.00185887	0.00900272	-0.00110051	-0.00053941	-0.00523135	0.16717	0.188121	0.0687127	0.424003	424003066000	2.83301	6.30361	8.90018
43	-0.00574696	0.00328859	0.00276504	0.0071755	0.000353084	-0.00130734	-0.00446388	0.0017442	-0.00167274	-0.00262352	0.000112884	0.00325395	-0.000731537	0.0612431	0.0604046	0.0409837	0.162631	162631371000	1.29169	1.3104	4.05796
44	-0.000182348	0.000249409	-0.000271385	0.000411225	9.79171e-05	0.00581863	-0.000557199	-0.00350667	-0.00224302	-0.00176342	0.012456	-0.0044661	0.0101268	0.0647375	0.0751312	0.270489	0.410357	4.10357e+11	2.84112	6.33961	8.92566
45	0	0	0	0	0.0040428	0.00848794	0.00468508	-0.00487391	0.00884337	0.0114185	-0.0103115	-0.0223179	-0.0135376	0.172158	0.251358	0.46167	0.885186	885185610000	1.08324	0.9216	3.40311
46	0.00107057	-0.00518313	0.00150237	0.00550164	-0.000604884	0.0013067	-0.000509939	0.00012433	-0.000935603	0.00111737	-0.00186237	0.00103091	-0.00148898	0.0242152	0.021773	0.0438226	0.0898109	89810859000	0.992718	0.774	3.11872
47	-0.00220327	0.00386666	0.00722153	0.00848269	-0.00635024	0.00364301	0.00273593	-0.0112058	0.00595864	0.00336708	0.0023368	-0.00126301	-0.000998843	0.127292	0.205315	0.0459866	0.378593	3.78593e+11	0.815248	0.522	2.56118
48	0	0	0	0	0	0	0	0	0	0	0	0	0	0	0	0	0		0.135406	0.0144	0.42539

## Sheet: CMT16-12_SIII_0.1
																	Min	5.38865e+10
	CMT-16-12_SIII 0.1 step size	One point per grain	Average	0.0399106													Average	2.69798e+11
	nb grains =	48	Median	0.00628173													Median	2.0969e+11
Grain	q13	q23	q33	rqtotal	ac11	ac12	ac13	ac21	ac22	ac23	ac31	ac32	ac33	rac1j	rac2j	rac3j	rac total	rac total	grain size	grain surface	grain perimeter
ID	(in mm-2)	(in mm-2)	(in mm-2)	(in mm-2)										(in mm-2)	(in mm-2)	(in mm-2)	(in mm-2)	(in m-2)	mm	mm2	mm
1	0.0023832	-0.000256016	0.0392166	0.0392897	-0.0064914	0.00614092	-0.0145641	-0.00277786	0.00109302	-0.0072305	0.00397454	0.00100356	0.0134225	0.271964	0.111014	0.184006	0.566984	566983560000	0.829186	0.54	2.60497
2	0.000120863	-0.00150491	0.00303778	0.00339227	0.00126516	2.60778e-05	0.00294545	0.00183727	-0.000387352	0.00330188	-0.00384088	0.00155677	-0.00613244	0.0423669	0.0552649	0.115301	0.212933	212932768600	4.12988	13.3958	12.9744
3	-0.111202	0.00411567	0.0194184	0.112959	-0.00309152	0.00527782	0.00132539	-0.00579358	0.00506629	-0.000901288	-0.00595951	0.00154428	0.000324409	0.0969473	0.117612	0.0782821	0.292841	2.92841e+11	0.376953	0.1116	1.18424
4	0.167714	-0.00219428	-0.490886	0.518751	-0.0232199	0.00133986	-0.0263935	-0.00740146	0.020492	-0.0113196	0.0116129	-0.00457125	0.0365347	0.509533	0.39213	0.527188	1.42885	1428851130000	0.244106	0.0468	0.766883
5	0.00252817	-0.00150019	0.000282925	0.00295335	-0.00198504	-0.00214111	0.00262017	-0.00313824	-0.00270185	0.00358988	-0.00612016	-0.00158841	0.00437117	0.0674632	0.0942997	0.120797	0.28256	2.8256e+11	1.9399	2.95557	6.0944
6	0.000167796	0.00339164	-0.0026832	0.00432792	0.00122227	-0.0014079	0.00033016	0.00318457	-0.00205432	-0.000325788	0.00138997	-0.00157661	-0.000126465	0.0296033	0.0556468	0.0309305	0.116181	116180548000	1.1648	1.0656	3.65933
7	0.000697131	-0.000367516	-0.00728203	0.00732454	0.000450924	-0.00112564	0.00060249	0.00789519	0.00429304	0.00836747	0.0020534	0.00254944	0.00275493	0.0217905	0.205557	0.0735777	0.300925	300925152000	2.15268	3.63955	6.76286
8	-0.0122604	-0.318639	0.00230752	0.318883	0.000229451	-0.000134675	0.00250958	0.0051443	0.00114245	-0.00186214	0.0038055	0.000329425	0.00581148	0.028737	0.0814889	0.099464	0.20969	2.0969e+11	0.135406	0.0144	0.42539
9	-0.00746308	0.0054755	0.000162209	0.0092577	-0.00401743	-0.00646608	0.00192254	0.00208588	0.00408547	-0.00152701	-0.00548912	-0.00717358	0.00373459	0.124061	0.0769837	0.163973	0.365017	365017060000	1.7074	2.28959	5.36396
10	-0.00097318	0.00228312	0.00725959	0.00767211	0.00728056	-0.00109556	-0.000713167	-0.00336062	-0.000973883	0.000885808	0.0163787	0.00538512	-0.00043073	0.0908929	0.0522031	0.221945	0.365041	365041419000	2.44289	4.68716	7.67458
11	-0.0027088	-0.0049259	-0.0053765	0.00777874	-0.00463519	0.00763998	-0.00506376	0.0058407	0.00496581	-0.00191882	0.00343407	-0.00471952	0.0176379	0.173389	0.127253	0.257915	0.558557	558557340000	0.845606	0.5616	2.65656
12	-0.00811375	0.00525472	-0.0160646	0.0187488	-0.00129129	-0.00151162	0.00318591	0.00225582	0.00379815	-0.000825771	0.00410842	0.00217056	-0.000146684	0.0598883	0.0687974	0.0642567	0.192942	192942298000	0.759962	0.4536	2.3875
13	-0.000814705	-3.56135e-05	-6.47463e-06	0.000815508	0.00232673	-0.000363004	8.99532e-05	-0.00358553	0.00111761	-0.000307357	0.00226737	0.00180842	-0.000463679	0.0277969	0.050105	0.0453947	0.123297	1.23297e+11	0.976424	0.7488	3.06753
14	0	0	0	0	4.3871e-05	0.00185715	0.000536417	1.48011e-05	0.000311999	-0.000439017	-5.10606e-05	-0.0011465	0.00137619	0.0243743	0.00765817	0.0257375	0.05777	5.777e+10	0.117265	0.0108	0.368398
15	-0.000249782	0.000333623	7.94069e-05	0.000424265	0.000239846	0.000108882	0.000248028	-0.00161479	0.000196061	0.000991326	0.0018433	0.000736554	0.00201245	0.00596756	0.0280217	0.0459231	0.0799124	7.99124e+10	14.2087	158.571	44.6379
16	-0.0209536	0.0103155	0.00455057	0.0237944	0.000335764	-0.00128784	-0.000246132	0.0017922	-0.00198526	-0.000571613	-0.005035	0.00236484	0.000526651	0.0186973	0.0434907	0.0792648	0.141453	1.41453e+11	0.443957	0.1548	1.39473
17	0.028311	-0.41186	0.095828	0.423808	0.00467484	0.00636667	0.00265094	-0.00294798	-0.00683814	-0.00619734	0.00729565	-0.00166074	0.0070149	0.136925	0.159835	0.159713	0.456472	456471980000	0.117265	0.0108	0.368398
18	-0.00319614	0.00154361	-0.00380913	0.00520649	0.00472187	-0.00432653	0.00587162	-0.00181978	0.00209735	0.00193751	0.00309389	0.0059373	0.000328279	0.1492	0.0585463	0.0935947	0.301341	3.01341e+11	1.09377	0.9396	3.43619
19	-0.00676348	0.00447943	0.00239876	0.00845955	0.00392842	-0.0063828	0.0116366	-0.0148866	0.0131234	0.00498773	-0.00346691	-0.0289407	0.00648759	0.219478	0.329977	0.388952	0.938407	938406810000	1.70471	2.28239	5.35552
20	-0.0049004	0.00183239	0.000273125	0.00523891	-0.00385465	0.000962626	0.00357207	-0.00150736	-1.59965e-05	0.00493783	5.20565e-05	0.00281035	0.00172689	0.0838934	0.0646118	0.0458929	0.194398	194398148800	0.874914	0.6012	2.74863
21	0.0107237	0.0278653	-0.00727705	0.0307316	-0.000460526	-0.00471887	-0.00328662	-0.000501342	-0.00806753	-0.00556164	-0.00133341	0.0137611	0.00879143	0.0846601	0.141305	0.23886	0.464825	4.64825e+11	0.478731	0.18	1.50398
22	0.000868746	-0.00193291	0.00031723	0.00214278	0.00218927	0.000990892	-0.00107387	0.00129077	-0.00138405	-0.00264108	-0.00036544	0.00239516	0.00140063	0.0425404	0.053159	0.0416122	0.137312	1.37312e+11	1.14696	1.0332	3.60329
23	-0.000132893	0.00305837	-0.000955676	0.00320697	0.000517807	-0.00121439	0.0045949	-0.0020369	-0.00298263	0.00215212	-0.00118884	0.000998222	0.0053456	0.063271	0.0717165	0.0753266	0.210314	210314025000	2.87794	6.50522	9.04133
24	0.0024236	0.00190734	0.00742777	0.00804261	0.000456133	0.00361001	0.000897192	0.000724551	0.00285325	-0.000472574	-0.00203823	0.000212769	0.000483063	0.0496334	0.0405037	0.0273407	0.117478	117477781000	0.716499	0.4032	2.25095
25	0.0457599	0.0400843	0.104181	0.120642	-0.00215705	0.000766308	0.000420278	0.00110013	-0.000411084	-0.00101981	0.000164246	0.00114494	0.000115049	0.0334364	0.0253102	0.0142424	0.0729889	72988939000	0.295109	0.0684	0.927116
26	-0.00111199	0.000688617	-0.0013998	0.00191577	-0.000360706	-0.00263777	0.00219566	0.000749837	-0.000590071	0.00254109	0.000792165	0.00125239	0.000240223	0.0519414	0.0388099	0.0228477	0.113599	113599050000	3.65465	10.4906	11.4815
27	0.0037795	-0.0198777	-0.00352945	0.0205394	0.00241734	-0.00112581	0.00268722	-0.00103323	0.00207282	0.000559814	0.00243687	0.00292788	-0.0016061	0.0623038	0.0366587	0.0697085	0.168671	168671052000	1.02453	0.8244	3.21867
28	0.00124875	0.00286935	0.000223044	0.00313725	-0.00258059	0.00238012	-0.00184332	0.00225877	0.00166799	-0.00327702	-0.00063282	-0.00164369	-0.00333633	0.0680402	0.0720378	0.0561284	0.196206	1.96206e+11	1.73271	2.35799	5.44348
29	-0.00205845	0.00286604	0.00119608	0.00372586	0.0026538	-0.000352523	-0.00190202	0.000544673	-0.00034446	0.000503816	-0.00254774	0.000183792	-0.00262042	0.0490834	0.0139295	0.0535195	0.116532	116532419000	1.04227	0.8532	3.2744
30	-0.000232846	0.00045962	2.24587e-05	0.000515725	0.00231401	0.00105789	0.000568	0.00042947	0.000795768	0.00221394	-0.00127889	-0.000365548	-0.00208793	0.039399	0.0343918	0.0373237	0.111114	111114460000	6.92951	37.7083	21.7698
31	-0.00314611	0.023474	0.00678639	0.024637	7.60925e-05	0.000705321	0.00137289	0.000933074	-0.000840637	0.000294715	0.000823406	0.000412557	-0.000320712	0.021543	0.0206843	0.0155667	0.057794	5.7794e+10	0.582401	0.2664	1.82967
32	-4.89686e-05	-0.000100492	-0.0016032	0.00160709	0.00629456	0.0014206	0.00389178	0.00174129	0.00141221	0.0018723	-0.00232241	0.0011022	-0.00220048	0.116069	0.050258	0.0562508	0.222578	2.22578e+11	8.07802	51.2448	25.3779
33	-0.0063571	0.00323573	0.00718341	0.0101234	-0.00169826	-0.0135138	0.00520367	0.00231141	0.000510345	-0.00224091	-0.00119257	-0.0100773	0.00508264	0.204157	0.0506267	0.163525	0.418309	418308984000	2.12805	3.55675	6.68548
34	0	0	0	0	-0.00208173	-0.00040396	-0.00197838	0.00290795	0.00188886	0.00117211	0.00251551	0.0010571	0.00139669	0.0446407	0.0596892	0.049693	0.154023	154022844000	0.117265	0.0108	0.368398
35	0.00688265	-0.0118903	0.00806271	0.0159298	0.000909462	-0.00115867	-0.00285824	0.000368286	-0.00294101	0.00156433	-0.000282201	0.00106162	-0.00177332	0.0492637	0.0487363	0.0311714	0.129171	1.29171e+11	0.690436	0.3744	2.16907
36	0.0106421	0.0276726	0.00595395	0.0302403	0.00369611	-0.00185731	0.00181507	0.00237222	-0.00031683	-0.000171876	0.00438725	0.00498193	0.00291924	0.0736849	0.0286093	0.122884	0.225178	225178447000	0.338514	0.09	1.06347
37	-0.0158184	-0.00991754	-0.00429107	0.019157	0.00385029	-0.000333272	0.000265243	0.00107571	-0.00207675	-0.000205043	0.00073451	0.00229012	0.00218811	0.0444881	0.033575	0.0521274	0.13019	1.3019e+11	0.483494	0.1836	1.51895
38	-0.000298773	0.00223421	0.00264164	0.00347264	-0.00282142	-0.00229325	-0.00363337	-0.000515312	-0.000607332	0.00430058	-0.00324228	0.00184303	-0.00222756	0.0874804	0.0542323	0.0731286	0.214841	2.14841e+11	1.98544	3.09597	6.23746
39	-0.00750712	0.00262989	0.00973582	0.0125722	0.00379277	0.000722181	-0.00178569	0.000237933	-1.62722e-07	0.0004805	0.00186728	6.33602e-05	-0.000746304	0.0630065	0.00718595	0.0267694	0.0969618	9.69618e+10	1.31977	1.368	4.14617
40	0.00118714	-0.00173975	0.000104735	0.00210879	-0.00069449	0.00290814	0.00270747	0.000980225	0.000863886	0.0023103	-0.000630531	0.00012398	-0.00161334	0.063101	0.0415441	0.0236786	0.128324	1.28324e+11	0.738549	0.4284	2.32023
41	0.00014439	-0.000702064	-0.000100829	0.000723816	-0.0116738	0.0221966	0.0019408	-0.000354723	0.00197154	0.0121696	-0.00295305	0.00106052	-0.00549566	0.358113	0.144958	0.0950922	0.598163	598163051000	1.94225	2.96277	6.10178
42	0	0	0	0	-0.000871806	-0.00105555	-0.00810282	-0.00477029	-0.00111532	0.00540162	-0.000660306	-0.000323646	-0.00313881	0.100302	0.112872	0.0412276	0.254402	2.54402e+11	2.83301	6.30361	8.90018
43	-0.00344818	0.00197315	0.00165902	0.0043053	0.00021185	-0.000784407	-0.00267833	0.00104652	-0.00100365	-0.00157411	6.77302e-05	0.00195237	-0.000438922	0.0367459	0.0362428	0.0245902	0.0975788	9.75788e+10	1.29169	1.3104	4.05796
44	-0.00019021	0.00502222	-0.0154375	0.016235	5.875e-05	0.00349118	-0.000334319	-0.002104	-0.00134581	-0.00105805	0.00747361	-0.00267966	0.00607605	0.0388425	0.0450787	0.162293	0.246214	2.46214e+11	2.84112	6.33961	8.92566
45	0.0348634	-0.0203808	-0.0335837	0.0525233	0.00242568	0.00509276	0.00281105	-0.00292435	0.00530602	0.00685109	-0.00618689	-0.0133907	-0.00812258	0.103295	0.150815	0.277002	0.531111	531111260000	1.08324	0.9216	3.40311
46	0.000642341	-0.00310988	0.000901424	0.00330098	-0.00036293	0.000784021	-0.000305963	7.45978e-05	-0.000561362	0.000670422	-0.00111742	0.000618545	-0.000893385	0.0145292	0.0130638	0.0262935	0.0538865	5.38865e+10	0.992718	0.774	3.11872
47	-0.00132196	0.00231999	0.00433292	0.00508961	-0.00381015	0.00218581	0.00164156	-0.00672345	0.00357518	0.00202025	0.00140208	-0.000757808	-0.000599306	0.0763751	0.123189	0.027592	0.227156	2.27156e+11	0.815248	0.522	2.56118
48	0	0	0	0	0	0	0	0	0	0	0	0	0	0	0	0	0		0.135406	0.0144	0.42539

## Sheet: CMT16-13_SII_0.05
																	Min	3.37738e+10
	CMT-16-13_SII 0.05 step size	One point per grain	Average	0.0402194													Average	5.64275e+11
	nb grains =	45	Median	0.00901375													Median	385124220000
Grain	q13	q23	q33	rqtotal	ac11	ac12	ac13	ac21	ac22	ac23	ac31	ac32	ac33	rac1j	rac2j	rac3j	rac total	rac total	grain size	grain surface	grain perimeter
ID	(in mm-2)	(in mm-2)	(in mm-2)	(in mm-2)										(in mm-2)	(in mm-2)	(in mm-2)	(in mm-2)	(in m-2)	mm	mm2	mm
1	0.00159828	-0.00204483	0.0082185	0.00861856	0.00244876	-0.000474547	-0.00390098	-0.000961018	0.000678514	0.00353706	0.00165839	-0.00220076	-0.00566076	0.0682429	0.0517659	0.0951992	0.215208	2.15208e+11	1.17264	1.08	3.68398
2	-0.010606	-0.0437292	-0.0295987	0.0538592	0.00313274	0.00348484	0.00280294	0.00165814	-0.0042869	0.00310001	-0.000638721	0.00106733	-0.00627519	0.0942052	0.0904505	0.0798125	0.264468	2.64468e+11	0.386789	0.1175	1.21514
3	0.143415	-0.139003	-0.146426	0.247649	0.00768185	-0.00140982	0.0011398	0.00896297	-0.00194609	-0.00737418	0.00396223	0.00167995	-0.0095016	0.102315	0.182832	0.151438	0.436585	436584910000	0.37847	0.1125	1.189
4	0.000476581	0.000376588	-0.000721939	0.000943475	-0.00220779	-0.000206376	-0.0018364	-0.00415314	0.00286174	0.00655061	0.000821359	0.000220327	0.00432834	0.0425057	0.135655	0.0537003	0.231861	231860888000	5.62896	24.8882	17.684
5	0.00822607	-0.0127162	-0.0100351	0.0181679	0.00513629	-0.00550821	-0.0242125	0.00451877	0.000706282	0.00541959	0.00798546	0.00431963	-0.0174362	0.34857	0.106446	0.297413	0.752429	752429253000	2.02402	3.21755	6.35866
6	0.000645598	0.000219207	0.000459076	0.000821948	0.000262964	0.000888632	0.00016276	-0.000333677	-4.36021e-05	-0.000381837	-0.000291064	-0.000460824	0.000552021	0.0131436	0.00759116	0.0130391	0.0337738	3.37738e+10	11.2113	98.666	35.2215
7	0	0	0	0	0.00278347	-0.00103989	-0.00786173	0.00617403	-0.0114881	-0.000740911	0.0144914	-0.00473117	-0.00154615	0.116851	0.18403	0.207687	0.508568	5.08568e+11	1.33392	1.39751	4.19066
8	-0.00415622	-0.00288724	-0.0499986	0.0502541	-0.000189888	0.00379275	-0.00116	-0.00106538	0.00037025	-0.00595125	-0.00573962	0.00415709	0.00637101	0.0514263	0.0738688	0.162677	0.287972	287972384000	0.558519	0.245	1.75464
9	0.0105127	-0.0108756	0.0152544	0.0214824	-0.00415943	0.00222521	-0.00265717	0.00988831	0.00885339	0.00633928	0.00447958	-0.0029359	0.00418764	0.090418	0.25081	0.116031	0.457259	457259070000	0.840622	0.555	2.6409
10	0.0170268	0.00743982	0.0179777	0.0258546	-0.000144371	-0.00221035	-0.00376385	0.00877053	-0.00819066	0.00755138	-0.00636238	0.00310028	0.00225299	0.0611857	0.245126	0.117157	0.423468	423467849000	0.319154	0.08	1.00265
11	-0.00083357	0.00171624	0.0160216	0.0161348	0.0110023	-0.00237446	-0.00361869	-0.0398538	0.0332935	0.0591272	0.00761614	-0.00995006	-0.0204562	0.169954	1.32274	0.380224	1.87292	1872922380000	0.653097	0.335	2.05177
12	0.144944	-0.0859223	-0.551466	0.576634	0.000126902	0.00455633	-0.00496074	0.00415323	0.0122853	-0.00066681	-0.00317074	5.7607e-05	0.00142647	0.0964397	0.171054	0.0465482	0.314042	314041706500	0.309019	0.075	0.970815
13	-0.0532581	-0.0296116	-0.014309	0.0625941	-0.00134235	0.00130266	0.00151148	0.00204605	0.00583056	0.00196035	-0.00868664	0.000263301	0.00113965	0.0415648	0.0983696	0.100896	0.24083	2.4083e+11	0.688682	0.3725	2.16356
14	0.0242386	-0.00415661	0.0314567	0.0399288	-0.000719454	-0.0023958	0.00209935	-0.0042888	0.00339822	-0.002601	0.00158224	0.000644253	-0.00454404	0.052146	0.10288	0.0677054	0.222731	2.22731e+11	0.821472	0.53	2.58074
15	0	0.0059099	0.00224485	0.00632188	-0.000400108	0.00213014	0.000242661	0.00605114	-0.000358295	-0.00373174	0.000427981	-0.000990325	0.00294348	0.0277291	0.101412	0.0436178	0.172759	172758627000	0.840622	0.555	2.6409
16	0.0348846	-0.0484417	-0.0556613	0.0816193	0.00767899	0.000115541	-0.0017137	0.00681481	-0.00472068	0.000673626	0.00967305	-0.000918364	4.05763e-05	0.0950823	0.122091	0.10632	0.323493	323493374500	0.504627	0.2	1.58534
17	0.00382083	0.00575483	0.00579058	0.00901375	-0.000658093	-0.000746348	0.000234851	-0.000453359	0.0003146	8.57215e-05	-0.0015211	0.000243771	0.000348907	0.0163929	0.0085368	0.0211377	0.0460675	4.60675e+10	1.27537	1.27751	4.00671
18	-0.00439934	-0.00448363	0.0152286	0.0164732	-0.0280028	-0.0249191	-0.0146981	0.0391331	0.00958457	-0.0169445	0.00731688	0.0353344	-0.00565762	0.6762	0.656622	0.483089	1.81591	1.81591e+12	1.31591	1.36001	4.13408
19	-0.000584109	0.00186519	0.00384057	0.0043093	0.0116551	0.00568716	-0.00740817	0.00786027	0.0102867	-0.00447207	0.00899196	0.00556577	-0.00816923	0.247504	0.22619	0.22727	0.700964	700963690000	2.57993	5.2276	8.10511
20	0.000301695	0.00487156	-0.000851858	0.00495467	0.0202984	0.000368043	0.000907475	0.00941172	0.00611003	0.0239818	-0.022899	0.0305521	-0.0028496	0.21574	0.395036	0.563006	1.17378	1173781425000	1.67557	2.20503	5.26397
21	-0.0550475	0.00415237	-0.00623122	0.0555544	0.00197328	-0.0157796	-0.00433131	0.00332788	0.00330673	-0.0141642	-0.000654313	-0.00582904	0.0060828	0.220842	0.207989	0.125661	0.554492	554491711000	1.52958	1.83752	4.80534
22	0.00131916	-0.021246	-0.0239752	0.0320615	-0.00717791	0.00500151	0.0220642	0.00261247	0.0114966	-0.00120426	-0.00565805	0.0034527	0.00807804	0.342437	0.153133	0.171888	0.667457	667457470000	0.947434	0.704999	2.97646
23	0.00324843	0.00153136	0.00278452	0.00454433	-0.000206205	0.000268471	-0.00026913	-0.00316042	0.00409487	0.00010739	-0.00173903	0.00184528	0.000133754	0.00743805	0.0736268	0.0371807	0.118246	118245545000	2.98281	6.98764	9.3708
24	-0.00139922	0.00330417	-0.00263764	0.00445337	0.00666299	-0.00594289	-0.00971954	-0.00374895	0.00367863	0.0044382	0.00823869	-0.00137681	-0.00696945	0.223254	0.118658	0.165849	0.507761	507761480000	1.2153	1.16	3.818
25	-0.00136683	-0.0191557	0.000824283	0.0192221	0.00210462	0.000143951	0.0015813	0.00221602	-0.00198197	0.000846595	-0.00278857	0.00746148	-0.0037192	0.0382987	0.0504459	0.139692	0.228437	2.28437e+11	1.61756	2.05502	5.08174
26	0	0	0	0	-0.0102176	0.012414	0.0262066	-0.00328012	0.00259726	0.00888118	-0.0104412	0.0118083	0.0275054	0.488382	0.147586	0.49755	1.13352	1133516990000	2.00586	3.16005	6.30161
27	-0.00136035	-0.0104856	0.0162797	0.0194121	-0.00011279	-0.000406196	0.001172	-0.00506018	0.0013805	-0.00412209	-0.00237886	0.0011777	-0.00230732	0.0169099	0.105628	0.0586388	0.181176	1.81176e+11	1.32915	1.38751	4.17565
28	-0.00174475	0.0029849	0.00440307	0.00559829	-0.00429819	-0.00227718	-0.00133465	-0.00256701	0.00260213	-0.000577745	-0.000446509	0.00218387	0.0052734	0.0791002	0.0574689	0.0790378	0.215607	2.15607e+11	1.6156	2.05002	5.07557
29	-0.00503419	0.0210326	0.0123415	0.0249003	-0.00411861	0.00249668	-0.00793285	0.00346346	-0.0076325	0.0136442	-0.00464847	0.00972998	-0.0120325	0.145481	0.247401	0.264109	0.656992	656991780000	1.24122	1.21	3.8994
30	-0.00222241	0.00725332	-0.00093349	0.00764337	0.00245429	-0.00292171	-0.00318342	-0.00350391	0.00271261	-0.00425605	-0.000323809	0.00549758	0.000283833	0.0855943	0.104726	0.0610522	0.251372	251372284000	0.650655	0.3325	2.0441
31	0.000339999	0.0043736	-0.00235059	0.00497687	0.00405908	-0.0013432	0.00467737	-0.00171141	-0.000868079	0.000493757	-0.00900573	0.00231134	-0.00453709	0.100797	0.0307325	0.158542	0.290071	290070674000	0.945754	0.702499	2.97118
32	0.0114706	0.0647632	0.159081	0.172141	-0.0194163	-0.00864139	0.00878995	0.0202171	0.00492224	-0.0107968	-0.0281854	-0.00777973	0.0156763	0.368477	0.359361	0.516414	1.24425	1244251600000	1.028	0.829999	3.22958
33	-0.00225195	0.00153091	-0.00195358	0.00335133	0.00489989	-0.00233235	0.0056262	0.00263141	0.00569213	-0.00223849	0.007524	0.00245434	-0.0051136	0.128584	0.10562	0.150919	0.385124	385124220000	2.74024	5.89761	8.60874
34	0	0	0	0	-0.023527	0.00377962	-0.00789456	0.0363987	0.010255	0.0101899	-0.0444022	-0.0223023	-0.0273261	0.352012	0.568436	0.940306	1.86075	1860753920000	0.406843	0.13	1.27814
35	-8.28568e-05	0.000108433	0.000361948	0.000386819	0.00972355	0.000101437	-0.00019704	0.00349118	0.0039331	-0.00128168	0.000906337	-0.00195658	-0.00387229	0.10022	0.0870596	0.0673521	0.254632	254632005000	2.24336	3.95257	7.04772
36	-0.0808814	-0.00314389	-0.107061	0.134215	-0.00337227	-0.00369462	-0.0107189	-0.00330802	0.00304653	0.00364706	0.000323664	0.0105734	-0.0160382	0.177858	0.100016	0.269353	0.547226	5.47226e+11	0.402912	0.1275	1.26579
37	0.00556741	-0.00805133	-0.00523872	0.0111024	-0.000910899	-0.0027907	0.00307516	-0.00170567	0.00279953	-0.00215927	0.0036729	0.00233312	0.000506851	0.0677676	0.0666447	0.0651288	0.199541	1.99541e+11	0.690987	0.375	2.17081
38	0	0	0	0	-0.0347065	-0.0217478	0.00548351	0.0714725	0.0281755	-0.0578552	-0.00298924	0.00289555	-0.0101416	0.619378	1.57503	0.160264	2.35467	2.35467e+12	0.203421	0.0325	0.639069
39	-0.00522852	0.000552435	0.00545294	0.00757478	-0.00291437	-0.00375247	-0.0120607	-0.0152165	0.00438025	-0.0241522	0.00455643	0.0042623	0.00595259	0.187276	0.43749	0.147713	0.772479	7.72479e+11	1.27787	1.28251	4.01455
40	-0.00604901	0.00374079	0.0096744	0.0120074	-0.000934914	0.00608033	0.00594007	0.00237114	0.00232321	-0.00239598	0.00241306	0.00265729	0.000452362	0.129553	0.0709032	0.0552271	0.255683	2.55683e+11	0.842514	0.5575	2.64684
41	0.00197535	-0.0026838	0.00250621	0.00416964	0.00176358	0.00205597	0.00253532	-0.000302856	0.001057	-0.000968623	-0.00270007	0.00135127	-0.00129656	0.0635488	0.0232848	0.0534789	0.140312	1.40312e+11	0.75904	0.4525	2.3846
42	0.0387768	0.00190504	-0.0129397	0.0409232	0.00394392	0.0020567	-0.0105427	-0.00306977	-0.0102624	0.00533337	-0.00202001	-0.00203063	-0.00243616	0.165433	0.186656	0.0648679	0.416956	416956370000	0.34779	0.095	1.09262
43	0	0	0	0	-0.00756691	-0.000201775	-0.000593286	-0.00859716	-0.0110005	-0.0111576	0.00204445	-0.0120248	-9.69801e-06	0.0836197	0.307552	0.14079	0.531962	5.31962e+11	0.203421	0.0325	0.639069
44	0	0	0	0	0	0	0	0	0	0	0	0	0	0	0	0	0		0.0797885	0.005	0.250663
45	0	0	0	0	0	0	0	0	0	0	0	0	0	0	0	0	0		0.0797885	0.005	0.250663

[truncated: 19 more sheets: CMT16-13_SII_0.1, CMT16-13_SII_0.2, CMT16-13_SIII, CMT16-13_SIV, CMT17-2_SI, PI-0546_III, PI-0546_V 0.062, PI-0546_V_0.1, PI-0546_VII, PI-0546-VIII, PI-0546-XIV 0.07, PI-0546-XIV 0.1, PI-0546-XVI 0.07, PI-0546-XVI 0.1, PI-0546_XVII 0.07, PI-0546_XVII 0.1, PI-0546-XVIII 0.07, PI-0546-XVIII 0.1, PI-0546-IX]
