# Supplementary material for: Dislocation and disclination densities in experimentally deformed polycrystalline olivine
Source: Copernicus journal article supplement (doi:10.5194/ejm-35-219-2023), 2023-03-31
Supplement: Supplementary file 1 [file ejm-35-219-2023-supplement.zip › ejm-35-219-2023-supplement-title-page.pdf]

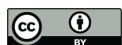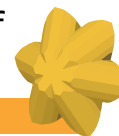

*Supplement of*

## **Dislocation and disclination densities in experimentally deformed polycrystalline olivine**

**Sylvie Demouchy et al.**

*Correspondence to:* Sylvie Demouchy ([sylvie.demouchy@uca.fr](mailto:sylvie.demouchy@uca.fr))

- [ejm-35-219-2023-supplement-title-page.pdf](#)
- [Discli\\_investigations\\_jan2023.xlsx](#)
- [Fig\\_S1\\_jan2023.pdf](#)
- [Fig\\_S2\\_jan2023.pdf](#)

The copyright of individual parts of the supplement might differ from the article licence.
