# Supplementary material for: Dislocation and disclination densities in experimentally deformed polycrystalline olivine
Source: Copernicus journal article supplement (doi:10.5194/ejm-35-219-2023), 2023-03-31
Supplement: Supplementary file 1 [file ejm-35-219-2023-supplement.zip › Fig_S1_jan2023.pdf]

## Dislocation and disclination densities in polycrystalline olivine experimentally deformed at high temperatures

Sylvie Demouchy\*, Manuel Thieme, Fabrice Barou, Benoit Beausir,  
Vincent Taupin & Patrick Cordier

**Supplementary Figure S1:** Example of MAD variation in the starting material, and compilation of the entrywise norm maps for all samples and the triplet  $\theta_{13}$   $\theta_{23}$  and  $\theta_{33}$  maps for all sample. See main text for details and see Table 2 for numerical values of  $\alpha_{ij}^c$  and  $\theta_{ij}$  densities. Grain boundaries are shown in green, subgrain boundaries in grey and non-indexed pixels in black.

Starting Material CMT-16-7-SII **Misorientation Average Deviation**

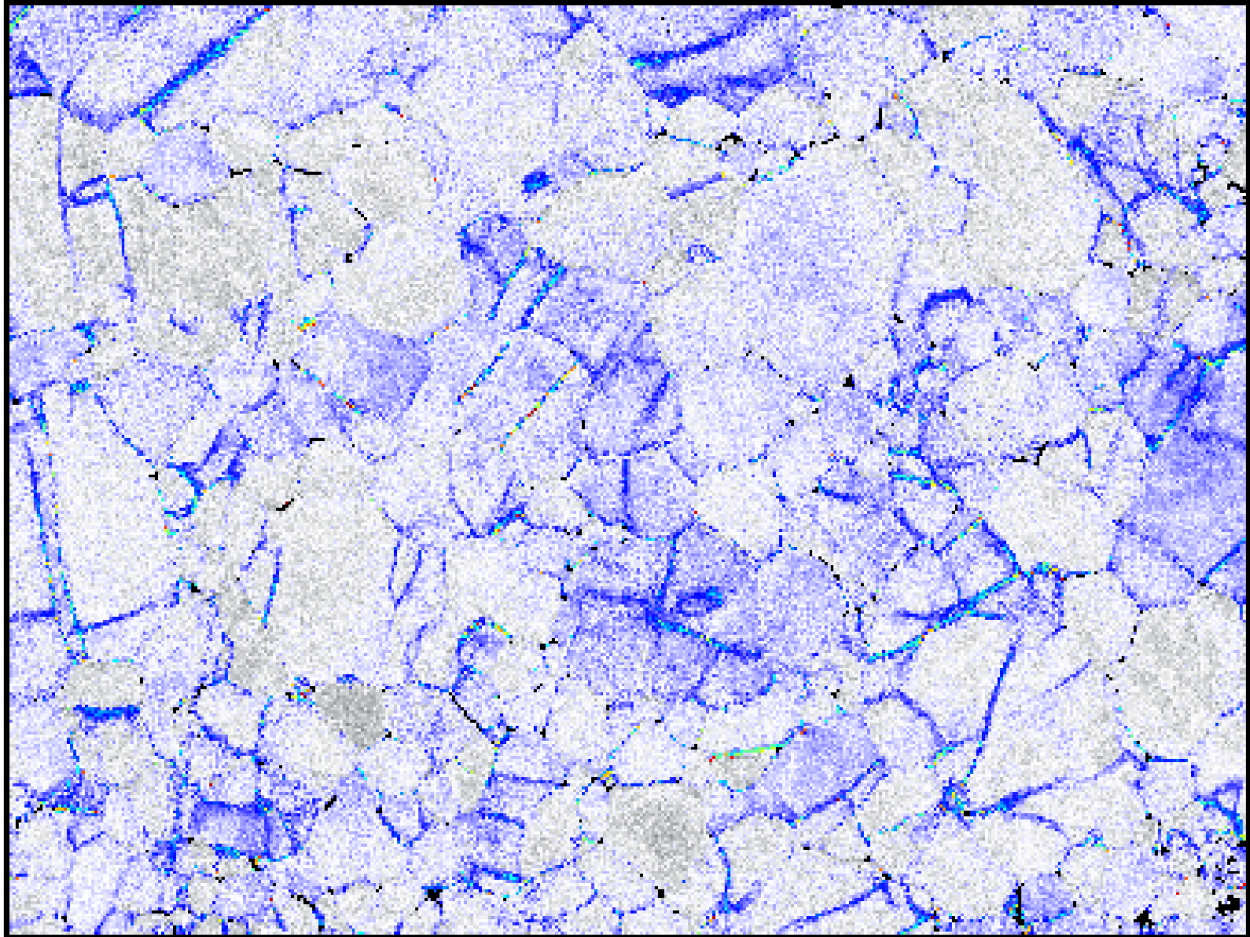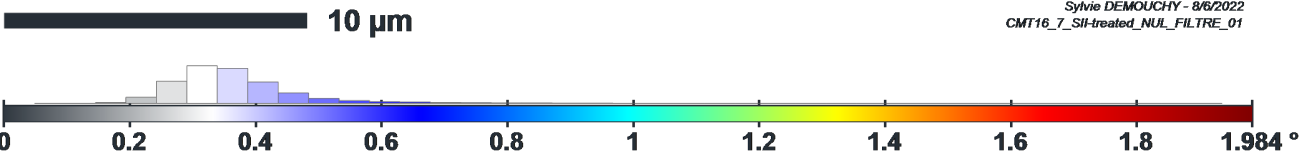

Step size: 0.1µm Resolution: 412x311 Index. Rate: 97% Magnification: x2500 Tension: 17kV  
Minimum: 0 Maximum: 1.98 Average: 0.37 S. Dev: 0.12 Entropy: 2.017  
Median: 0.35 Mode: 0

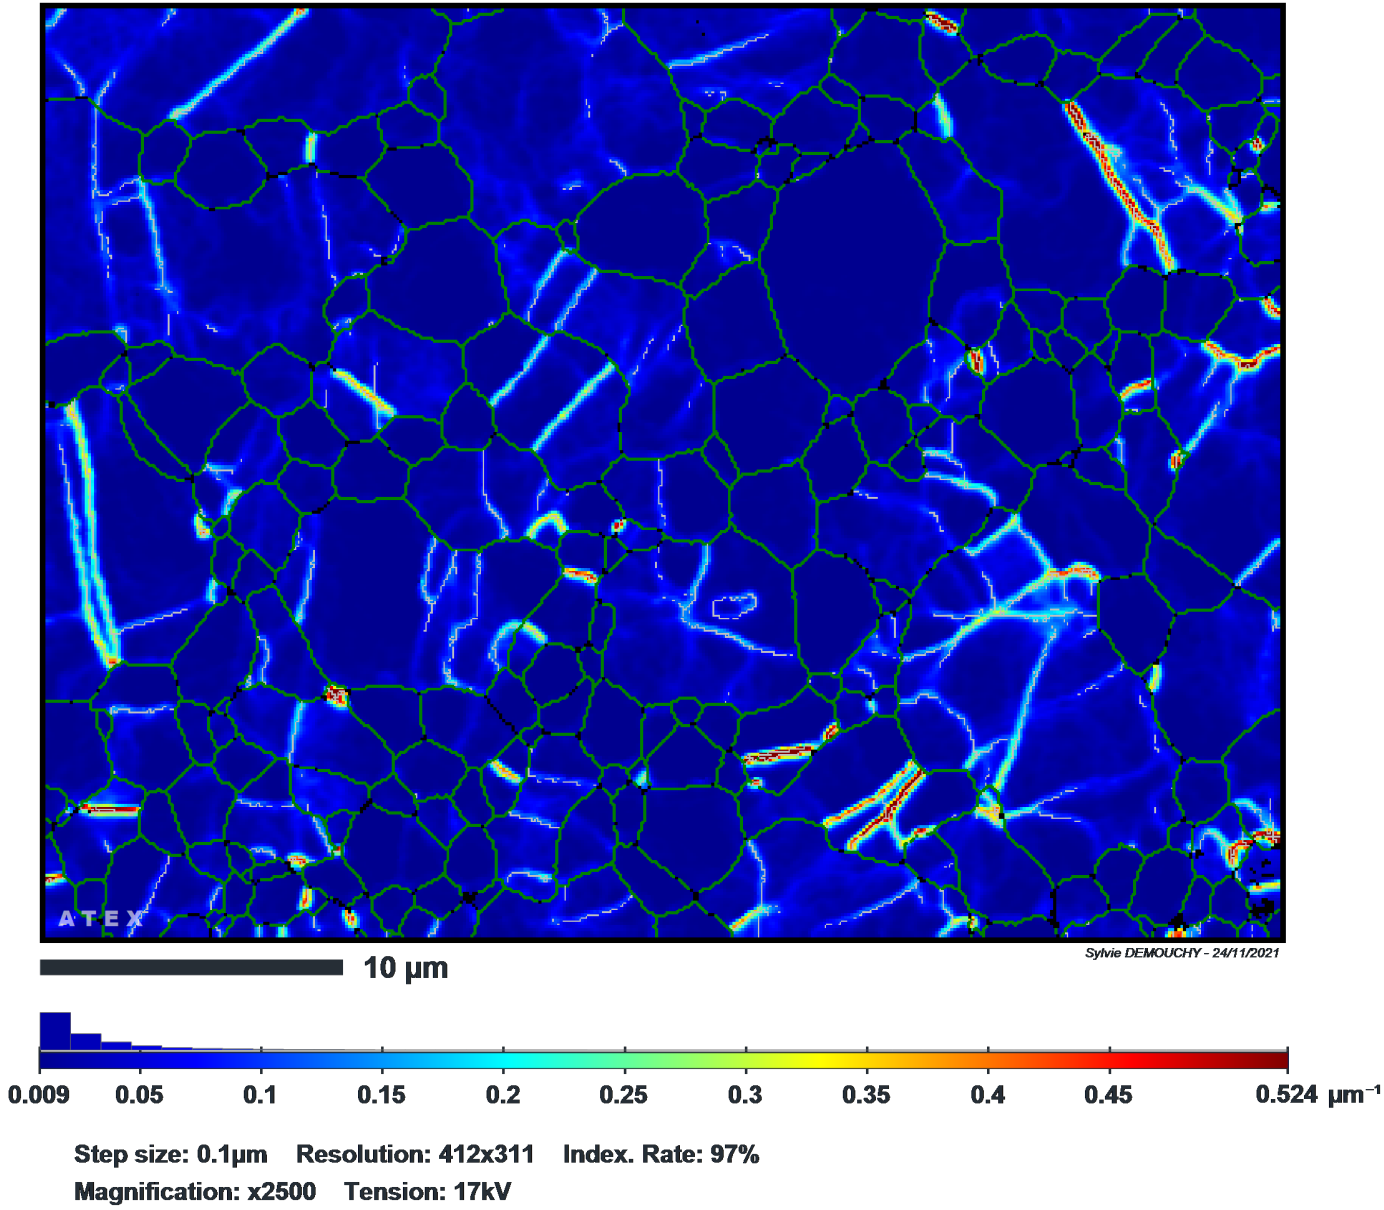

Starting Material CMT-16-7-SII    **13 component Of Disclination Tensor**

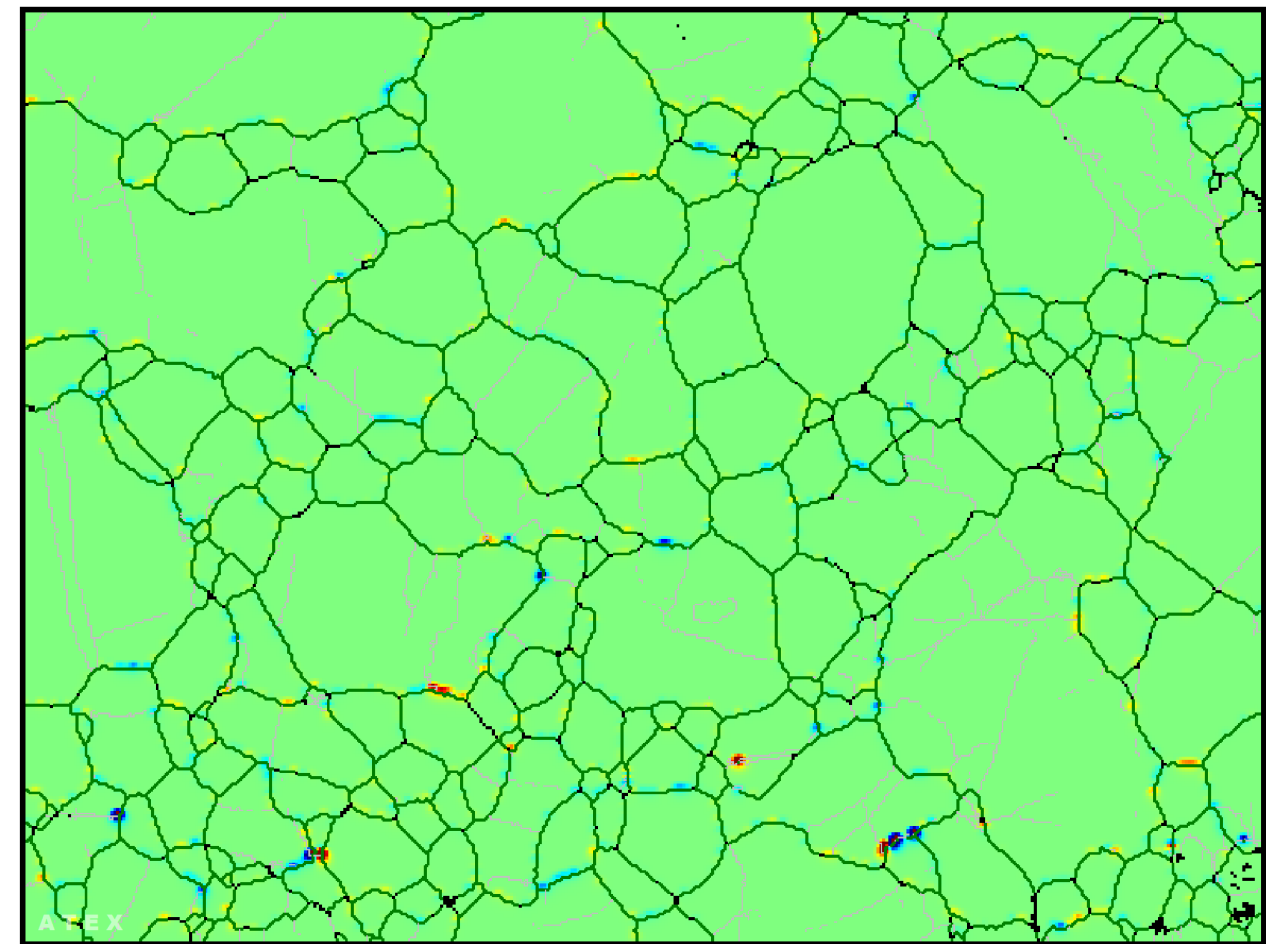

Sylvie DEMOUCY - 24/11/2021

10  $\mu\text{m}$

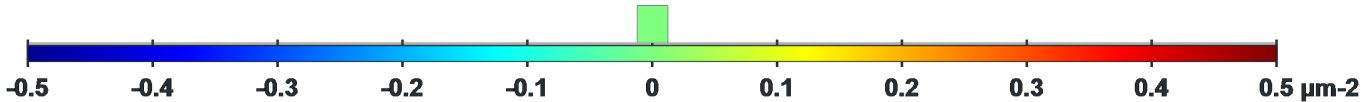

Step size: 0.1 $\mu\text{m}$     Resolution: 412x311    Index. Rate: 97%  
Magnification: x2500    Tension: 17kV

Starting Material CMT-16-7-SII    **23 component Of Disclination Tensor**

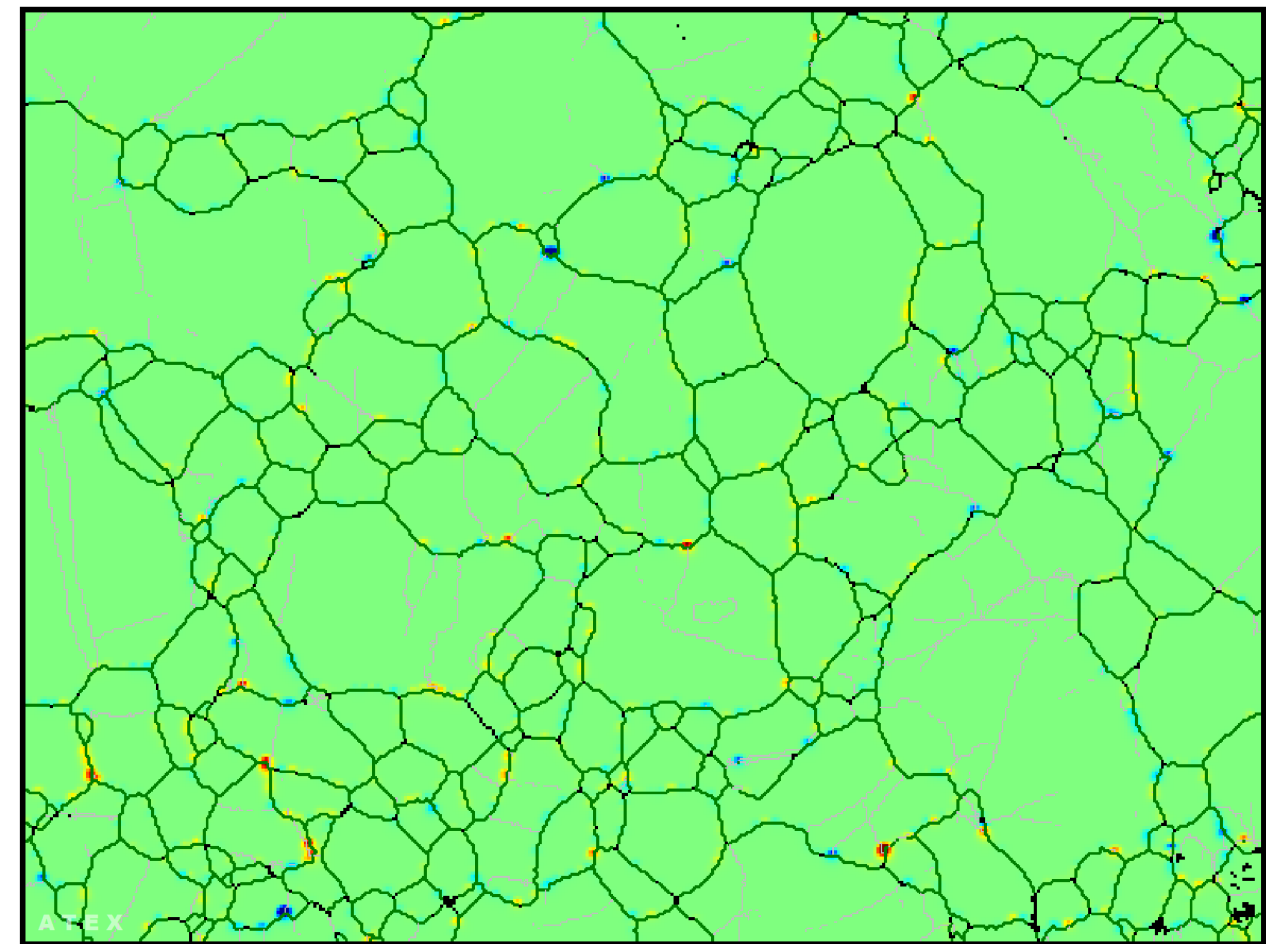

10  $\mu\text{m}$

Sylvie DEMOUCHEY - 24/11/2021

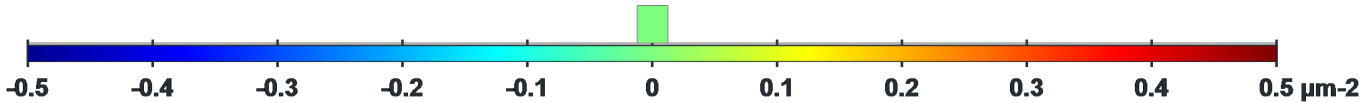

Step size: 0.1 $\mu\text{m}$     Resolution: 412x311    Index. Rate: 97%  
Magnification: x2500    Tension: 17kV

Starting Material CMT-16-7-SII **33 component Of Disclination Tensor**

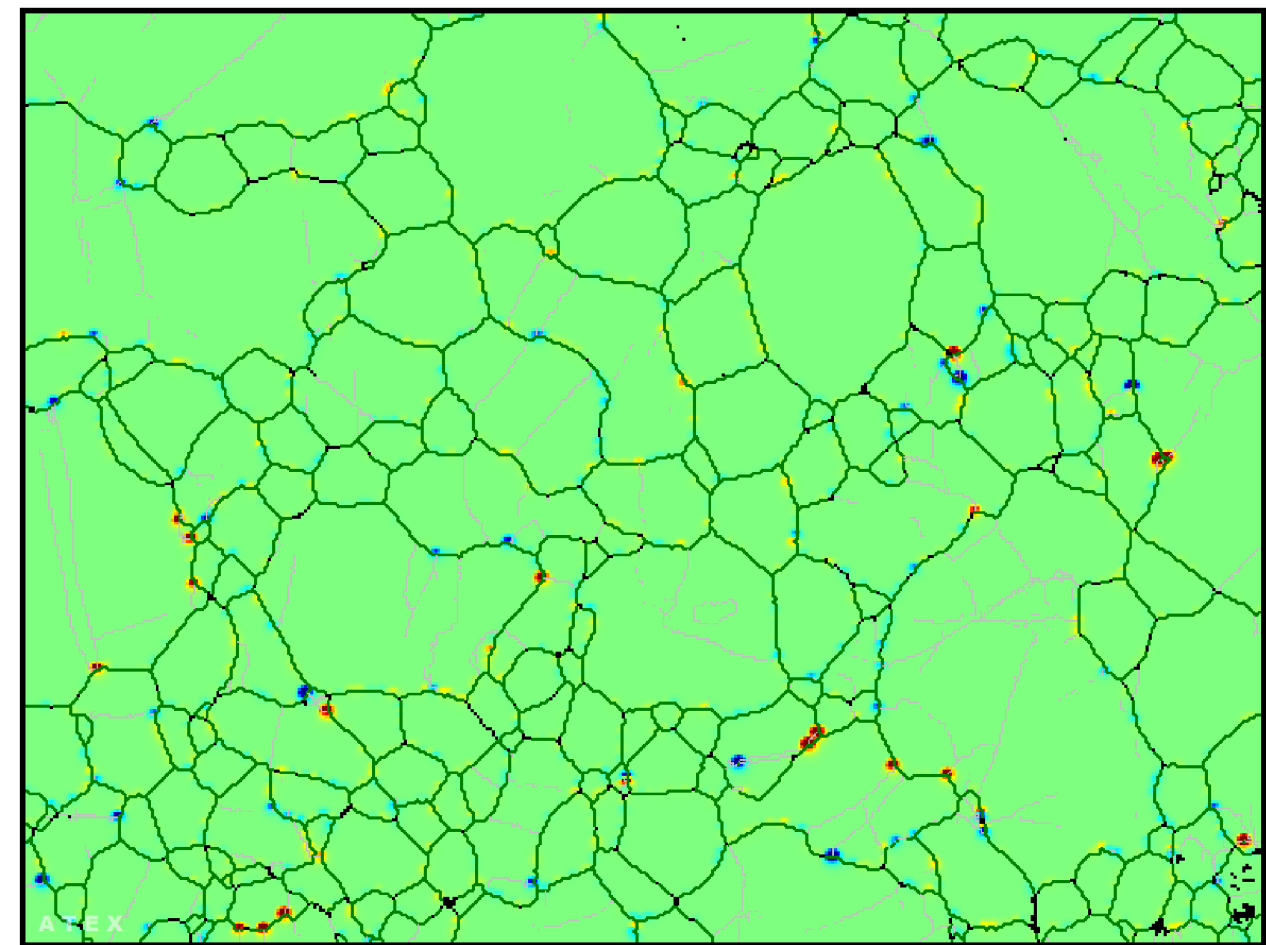

Sylvie DEMOUCY - 24/11/2021

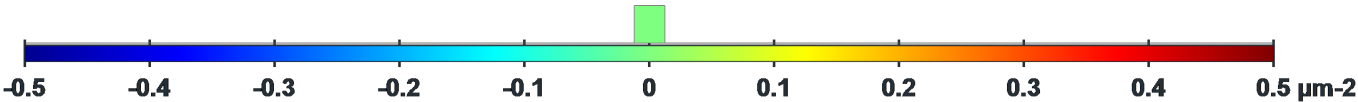

Step size: 0.1μm   Resolution: 412x311   Index. Rate: 97%  
Magnification: x2500   Tension: 17kV

Entrywise Norm of the Nye Tensor

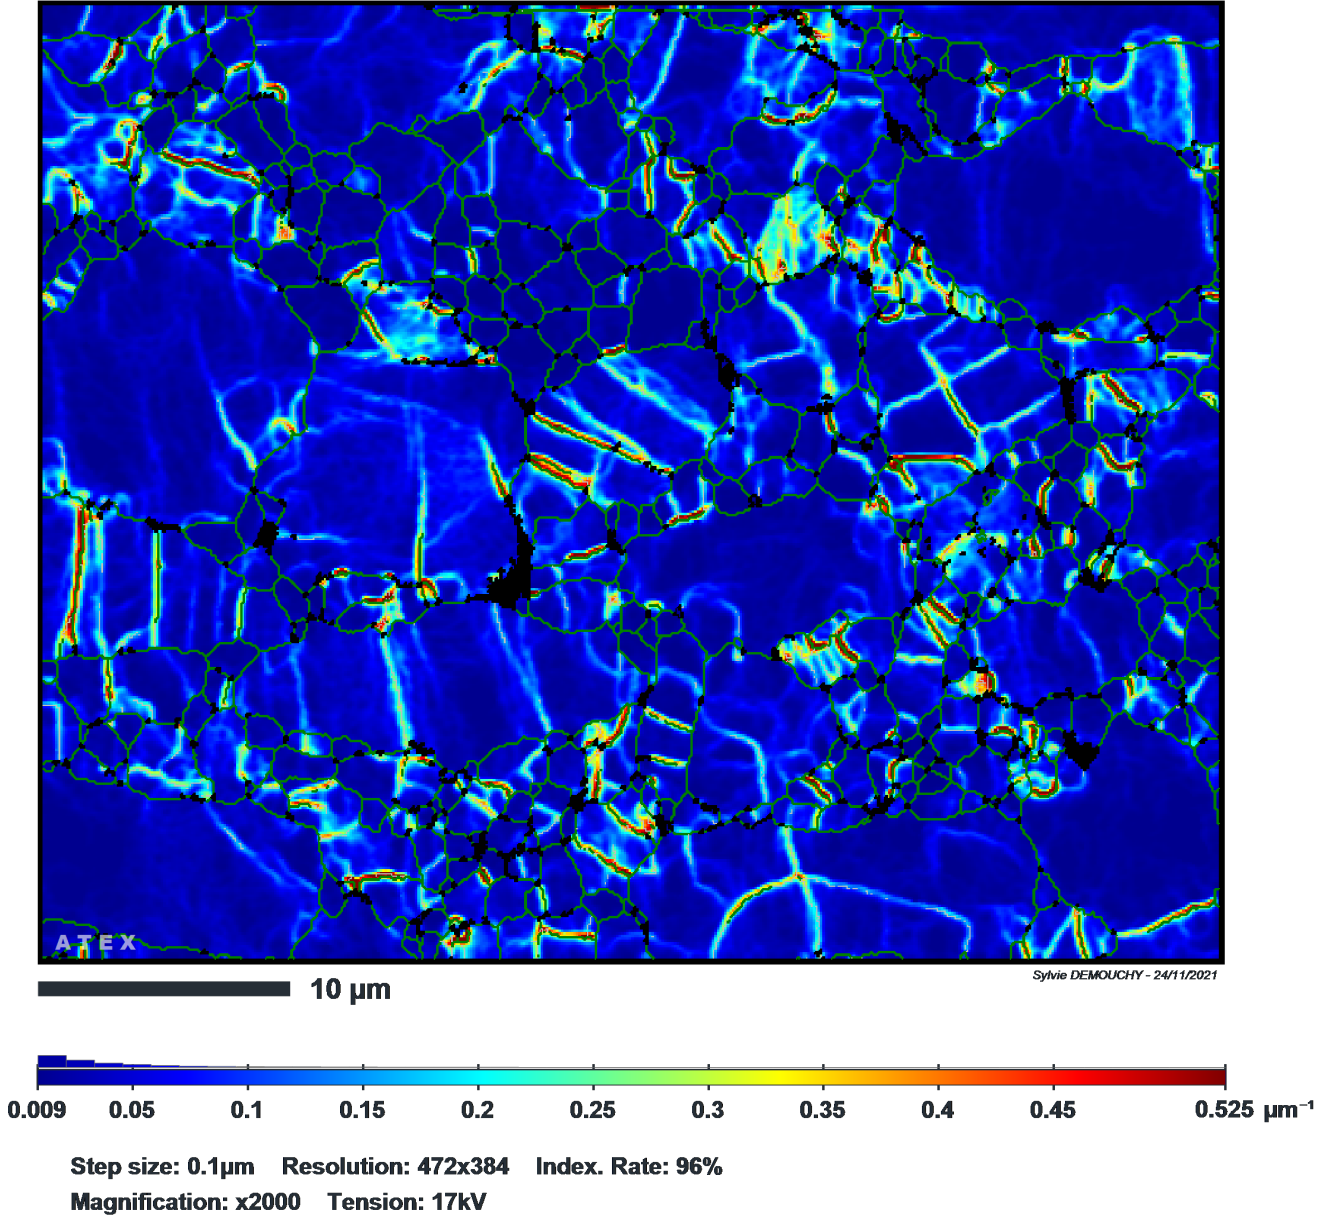

13 component Of Disclination Tensor

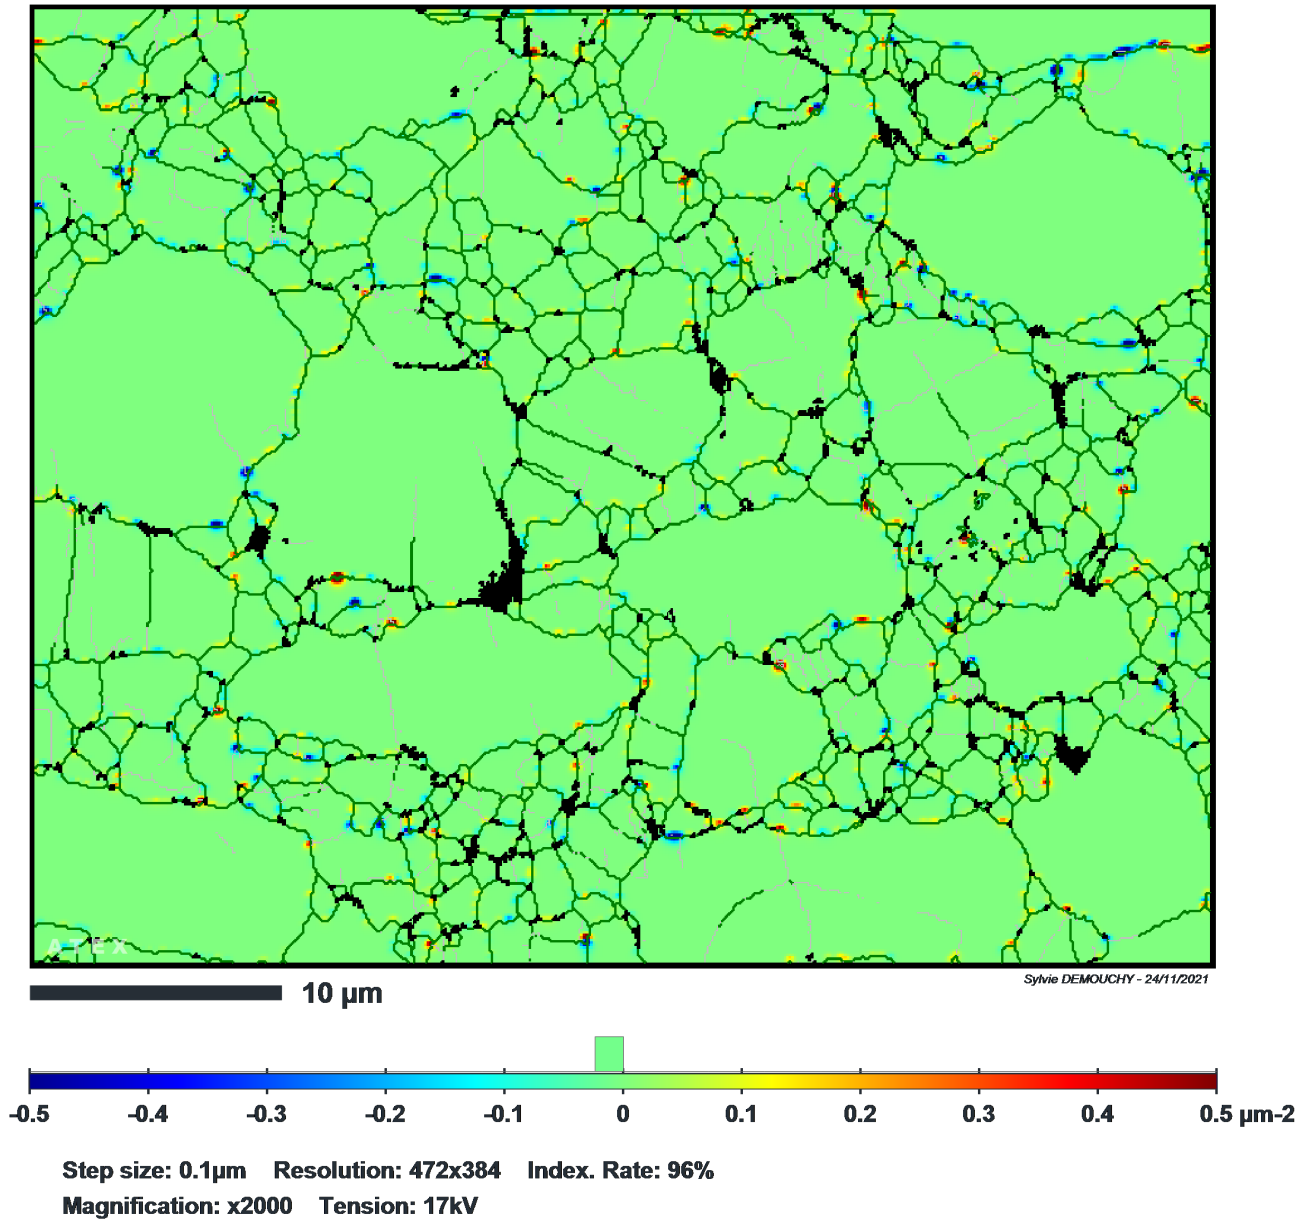

23 component Of Disclination Tensor

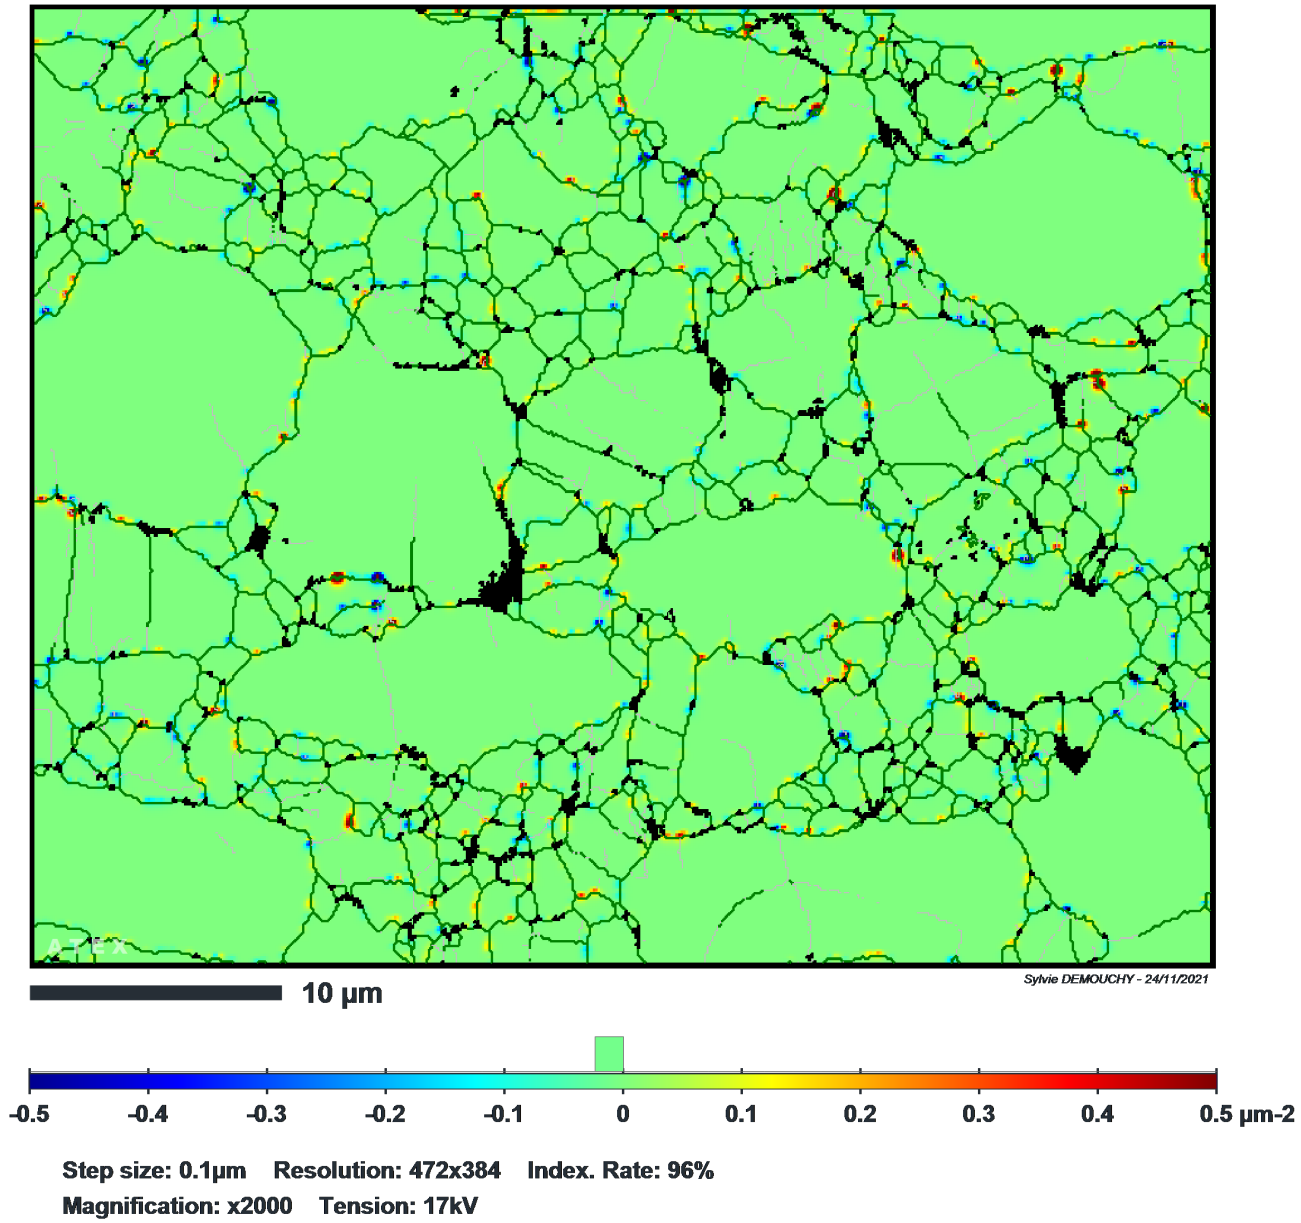

33 component Of Disclination Tensor

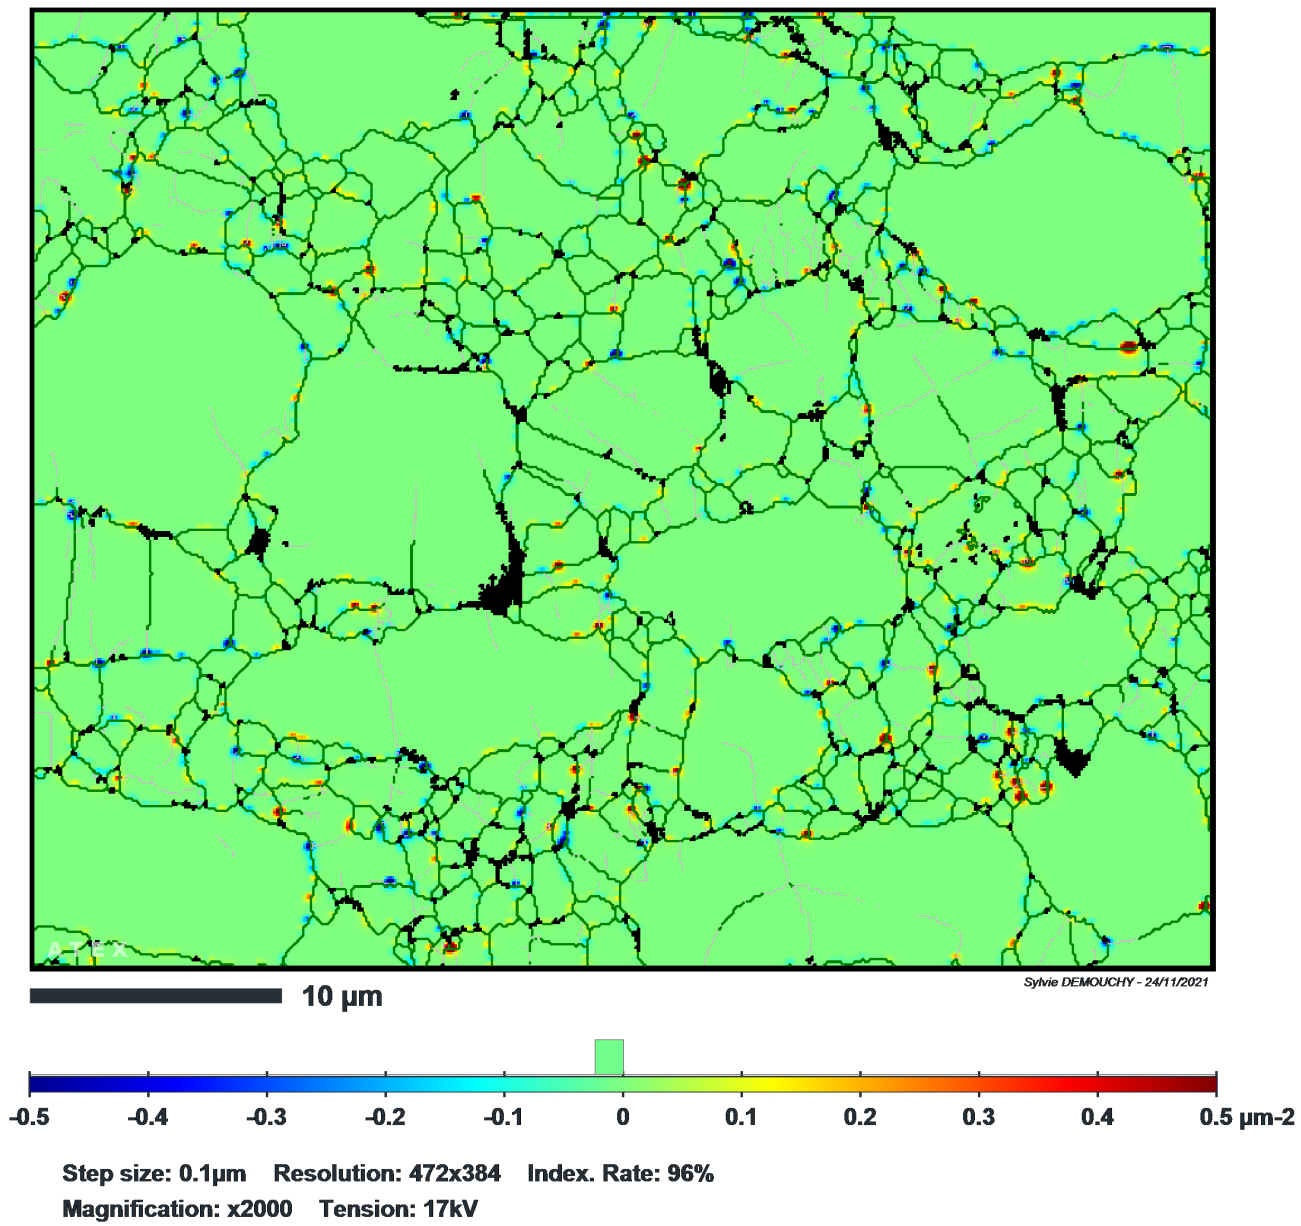

## Entrywise Norm of the Nye Tensor

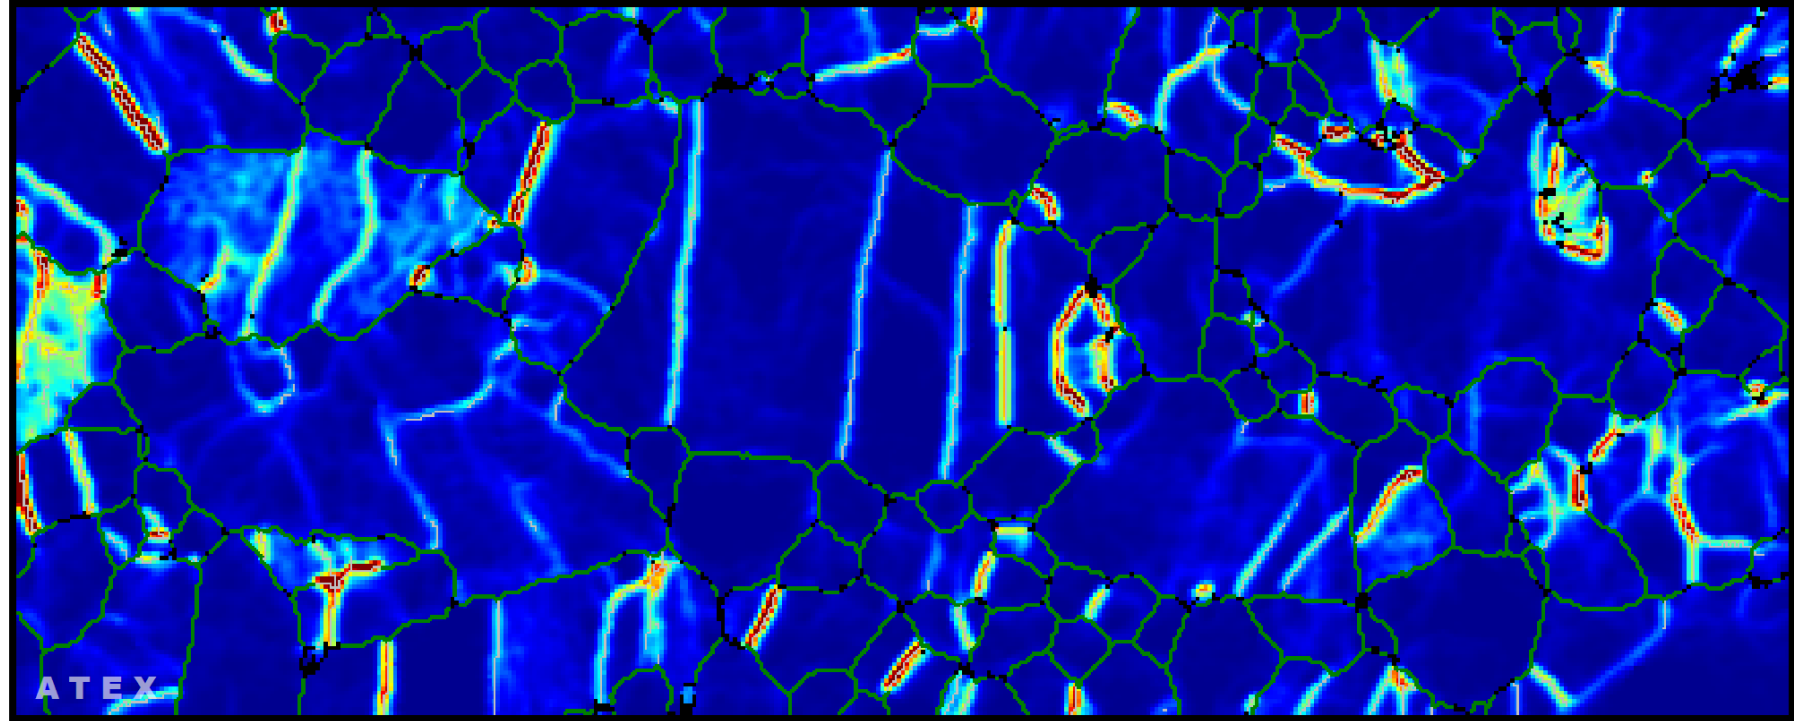

Sylvie DEMOUCY - 24/11/2021

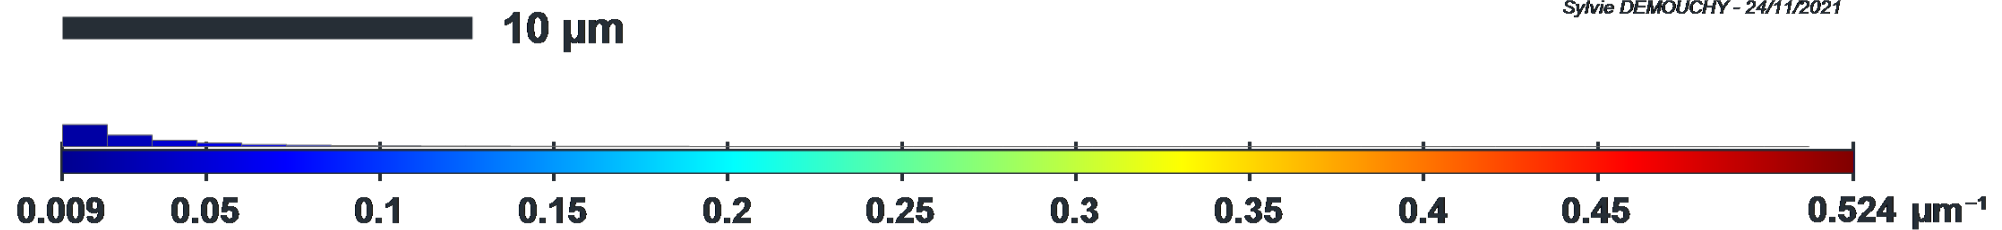

Step size: 0.1μm Resolution: 437x177 Index. Rate: 96%

Magnification: x2500 Tension: 17kV

## 13 component Of Disclination Tensor

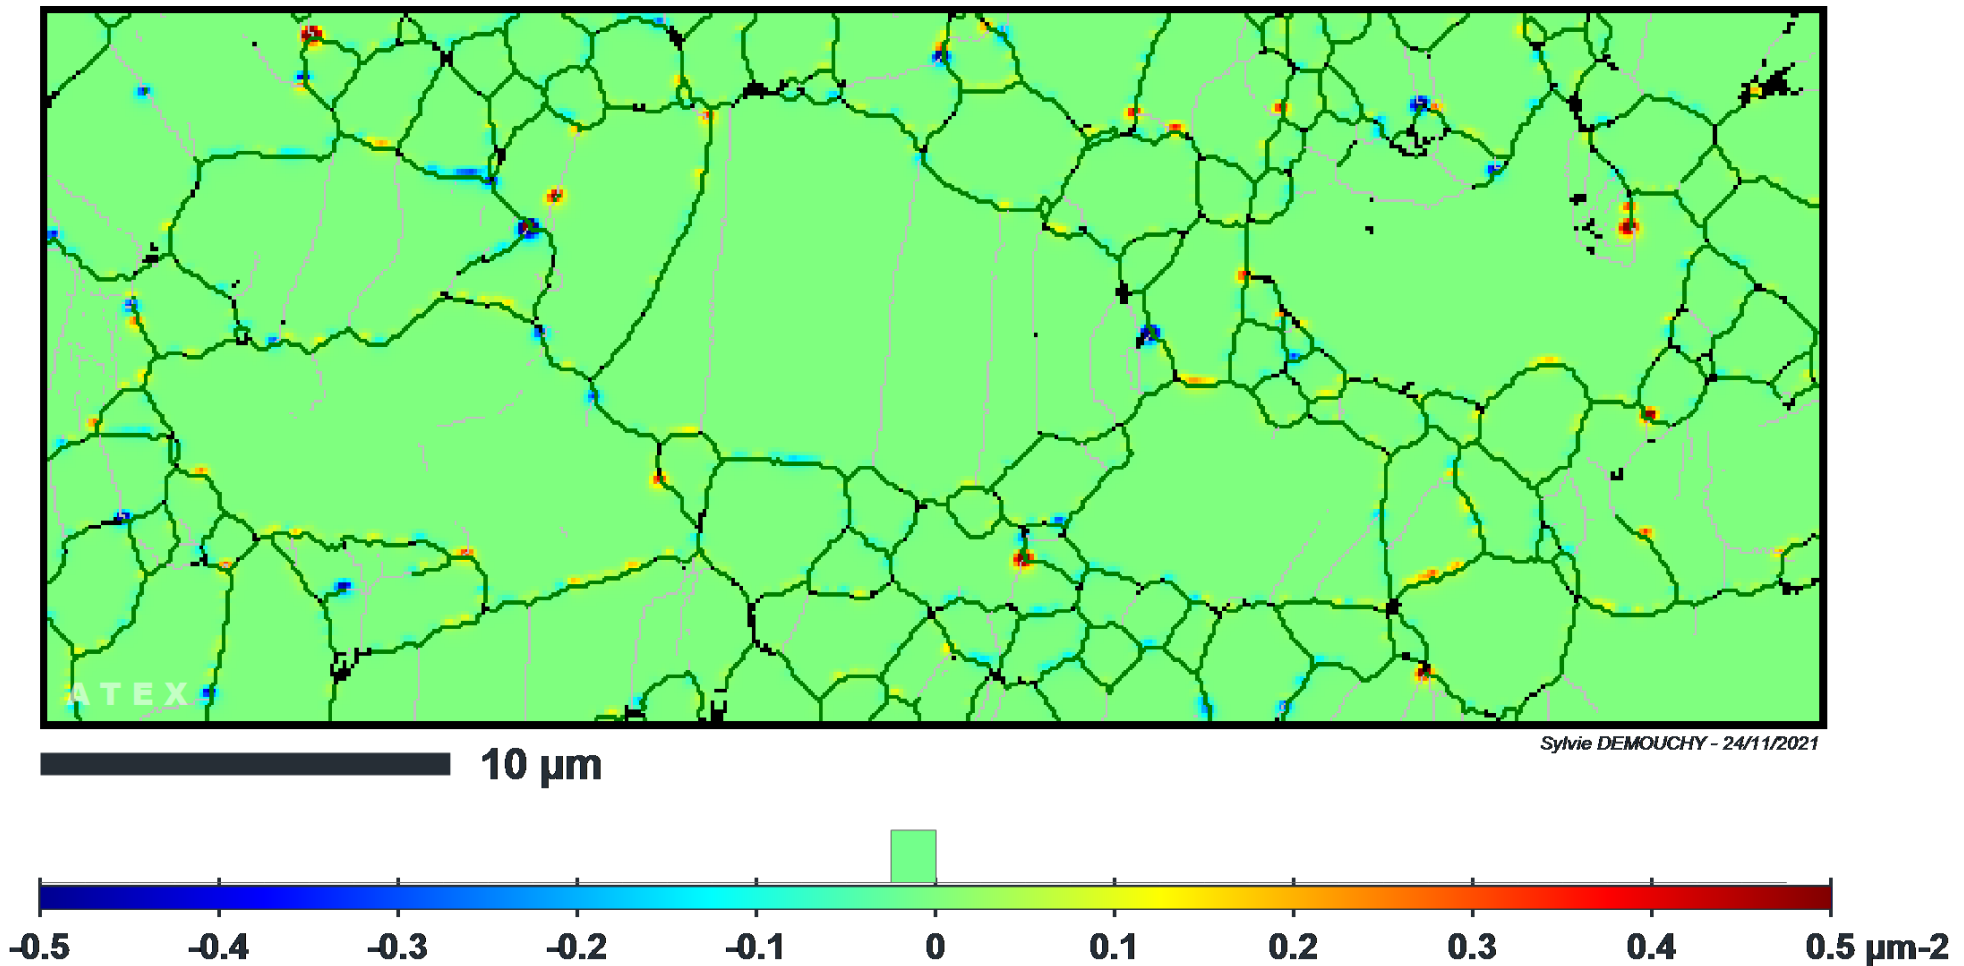

Step size: 0.1 $\mu\text{m}$  Resolution: 437x177 Index. Rate: 96%

Magnification: x2500 Tension: 17kV

## 23 component Of Disclination Tensor

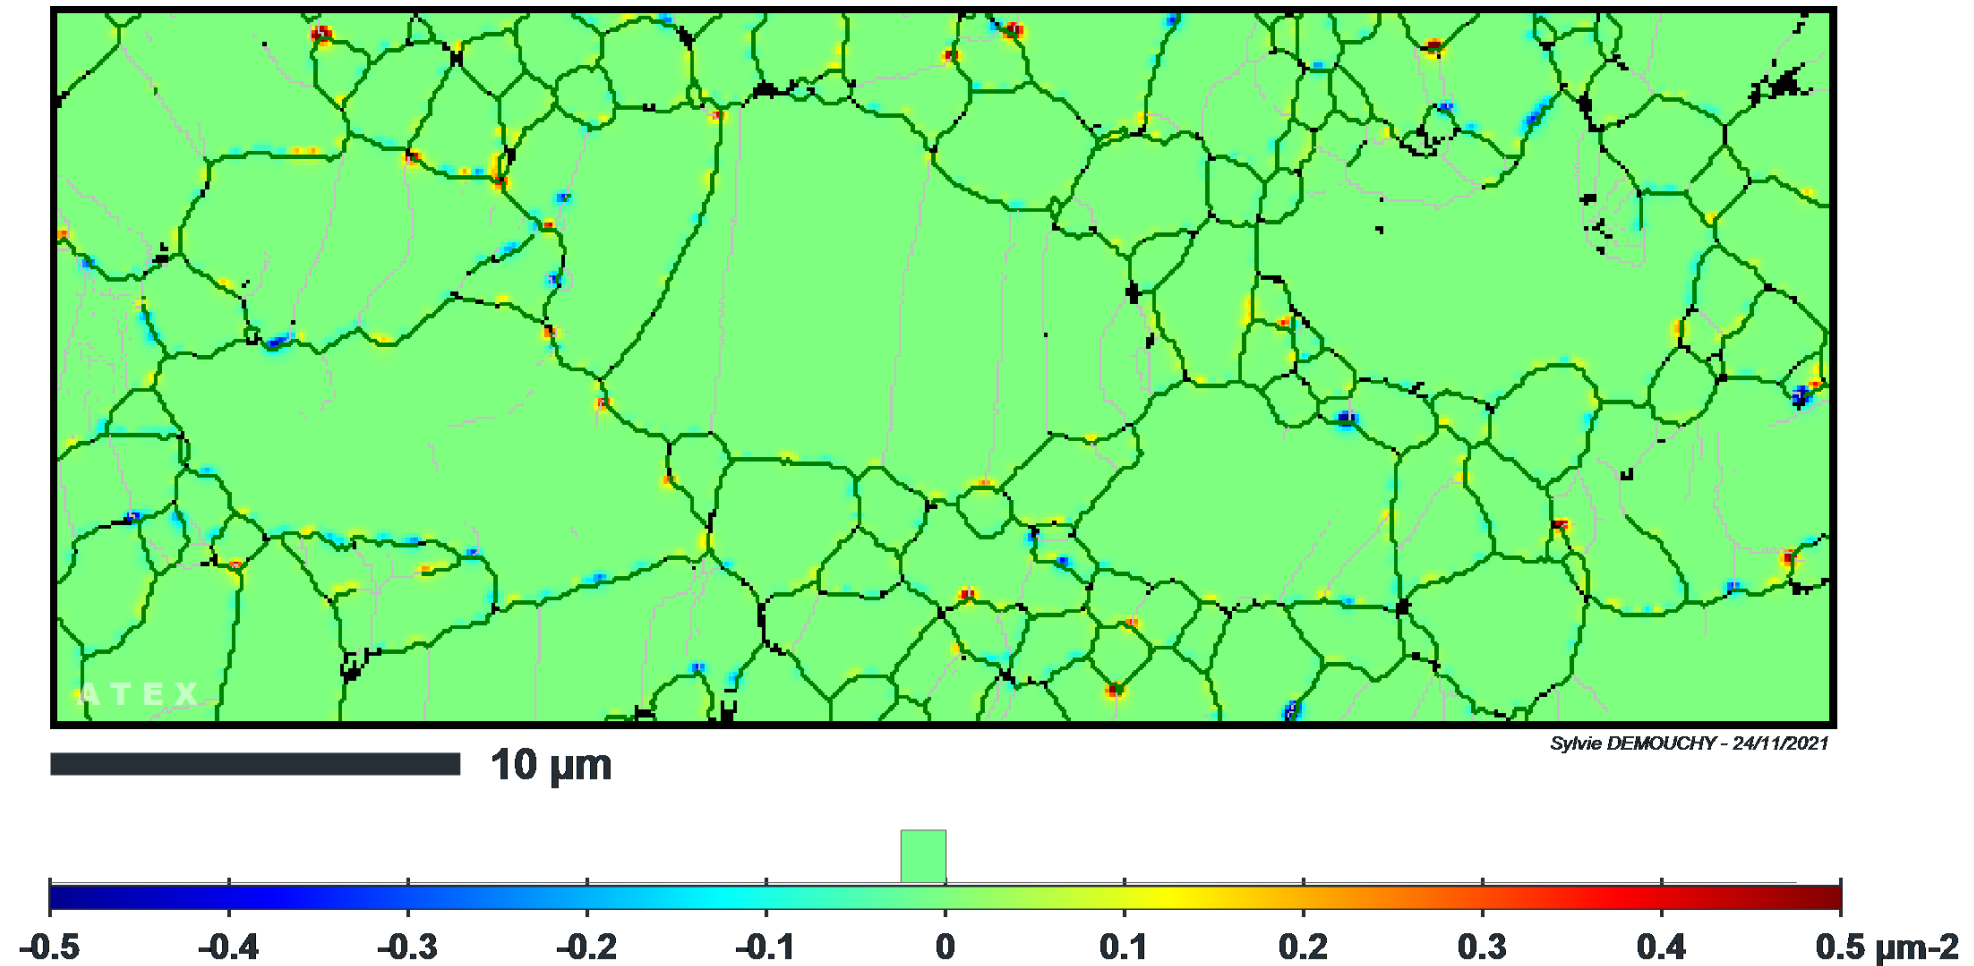

Step size: 0.1 $\mu\text{m}$  Resolution: 437x177 Index. Rate: 96%

Magnification: x2500 Tension: 17kV

## 33 component Of Disclination Tensor

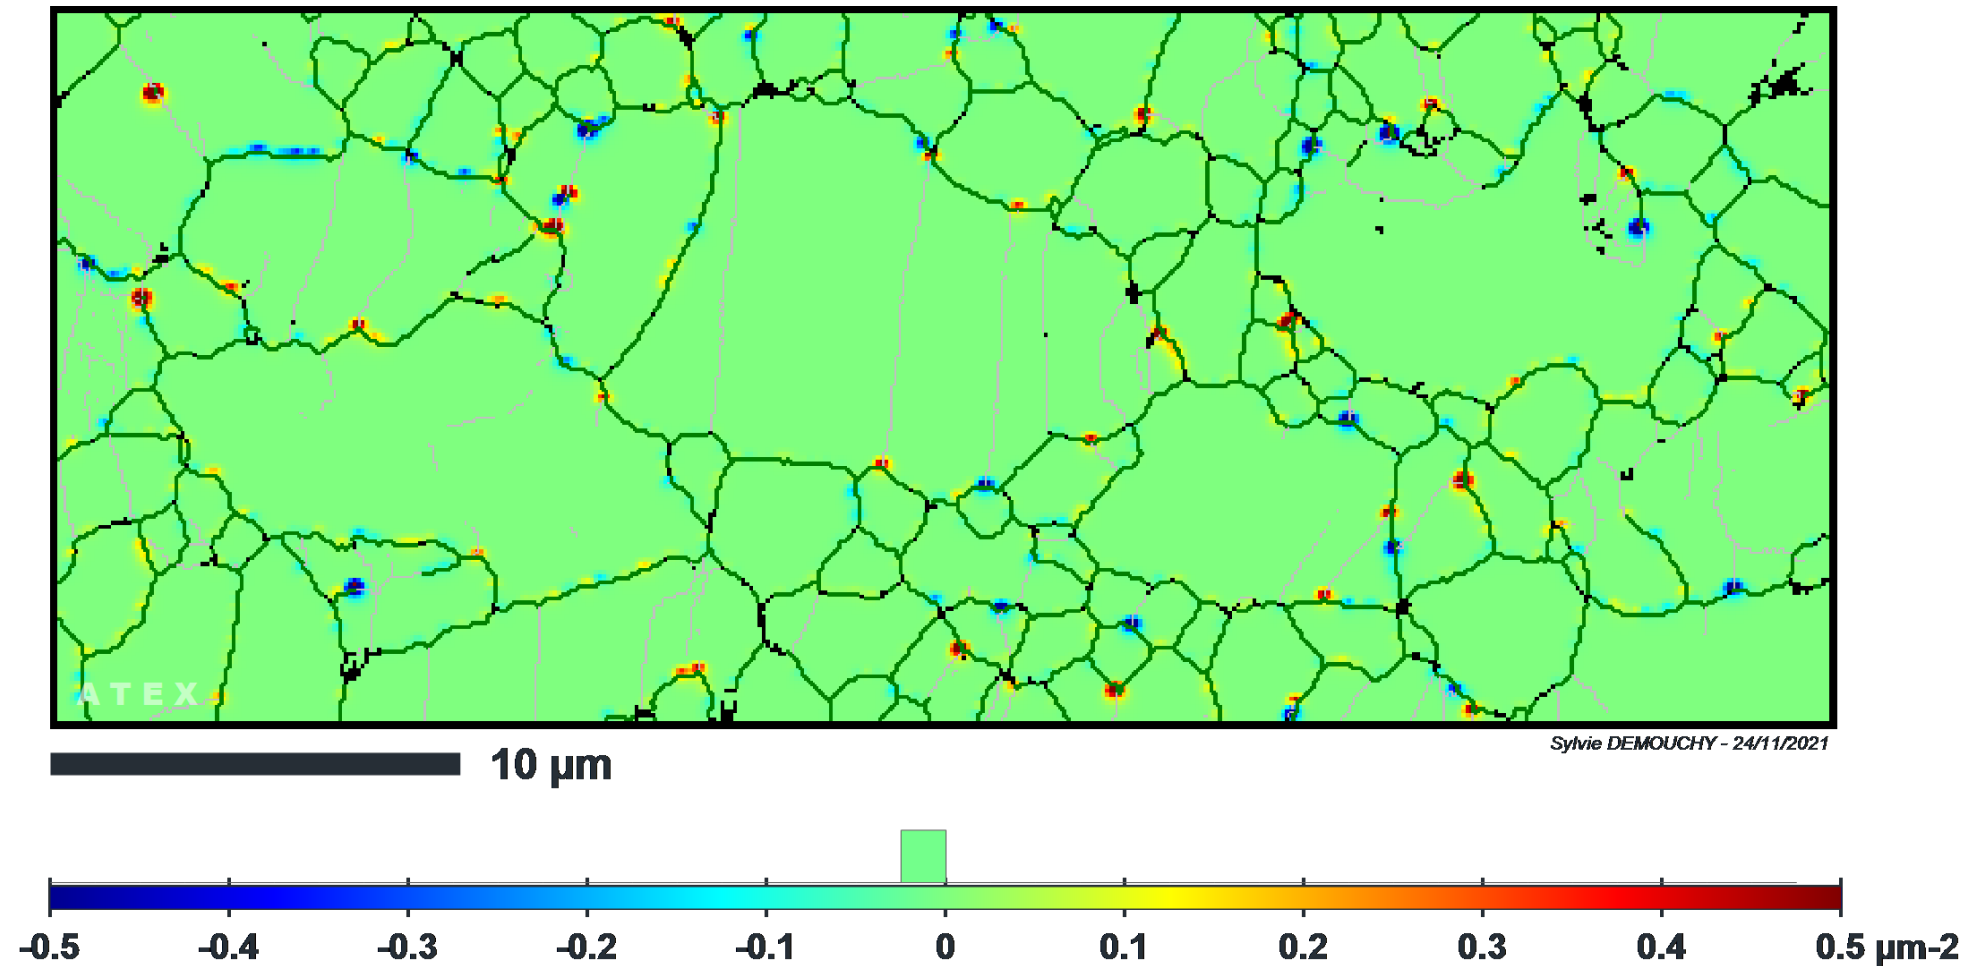

Step size: 0.1 $\mu\text{m}$  Resolution: 437x177 Index. Rate: 96%

Magnification: x2500 Tension: 17kV

## Entrywise Norm of the Nye Tensor

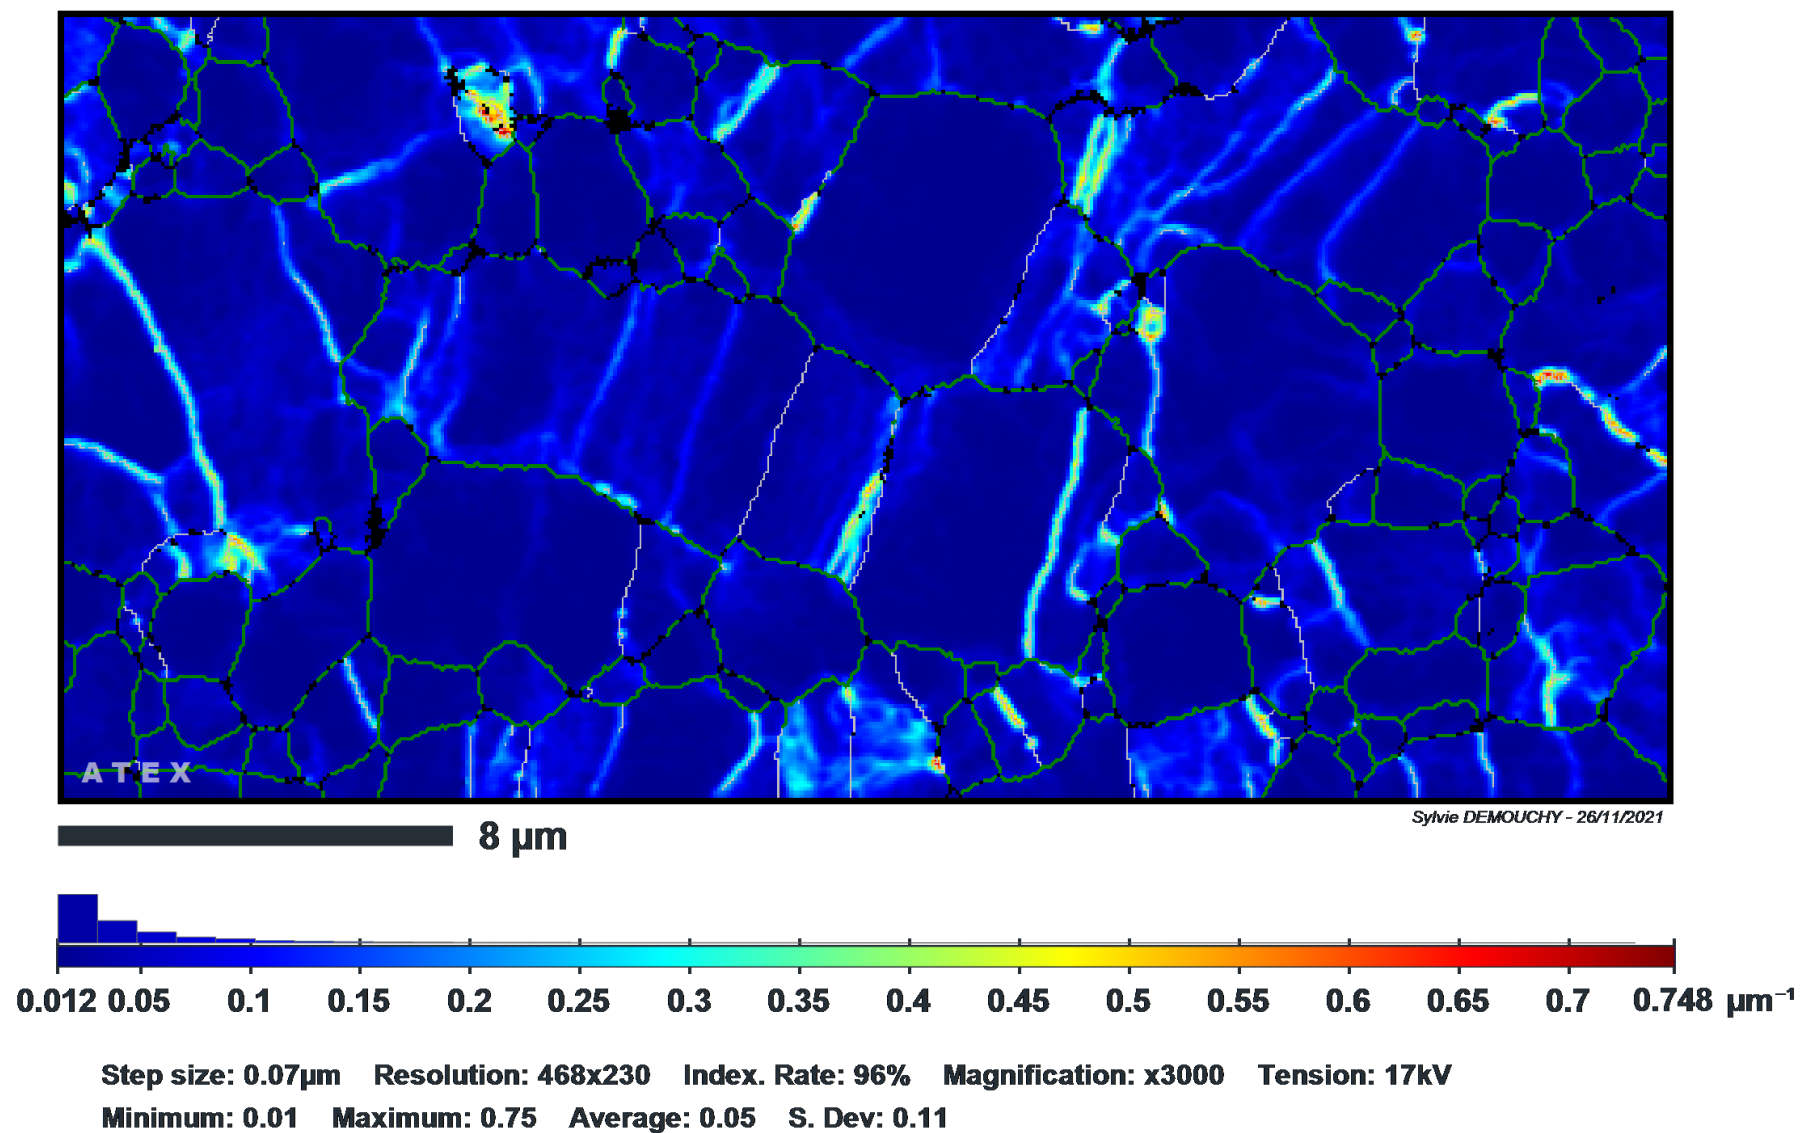

## 13 component Of Disclination Tensor

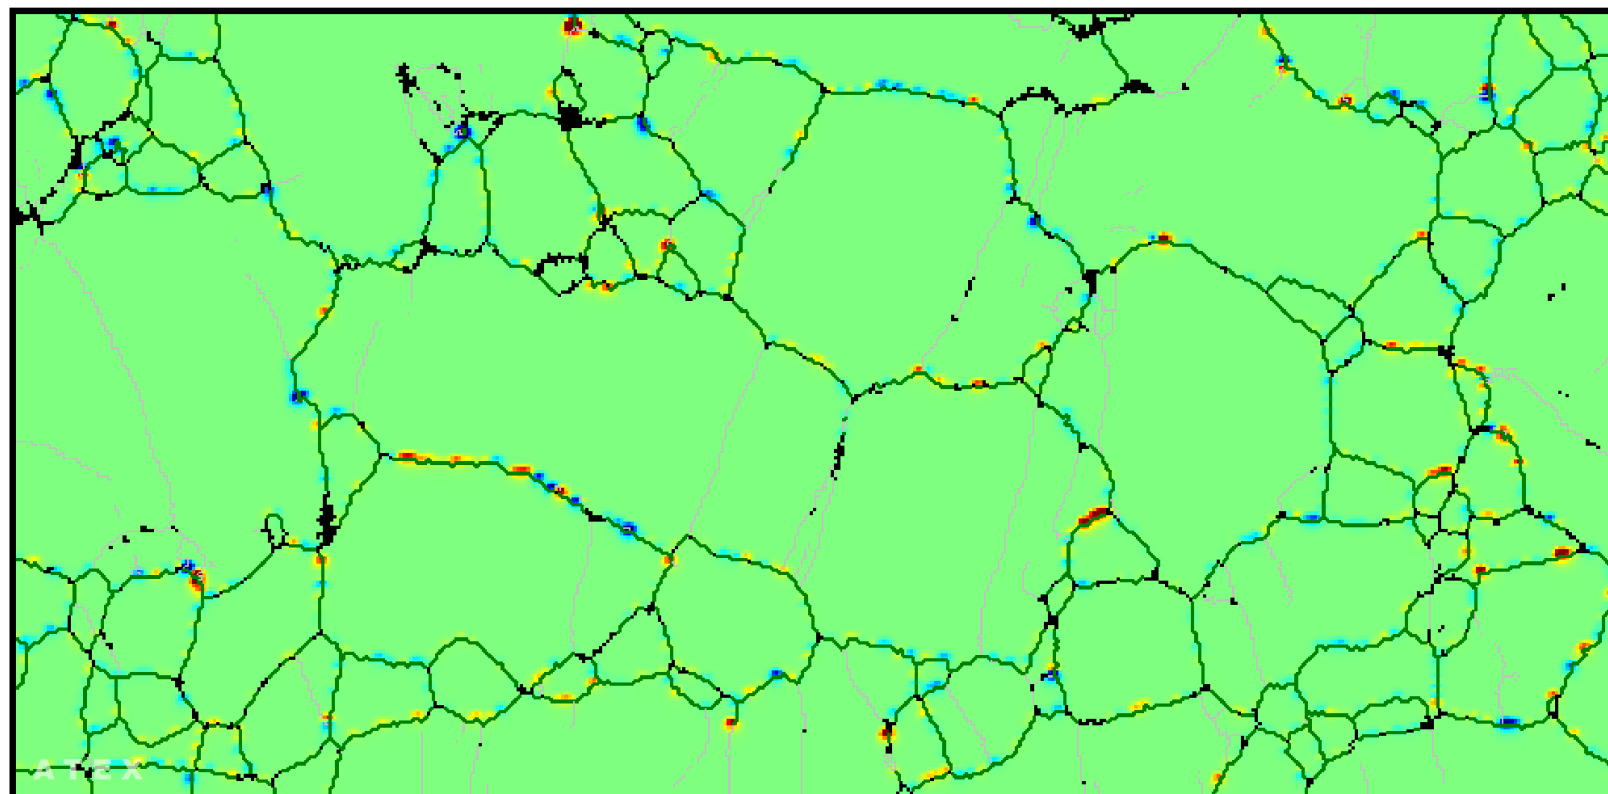

Sylvie DEMOUCY - 26/11/2021

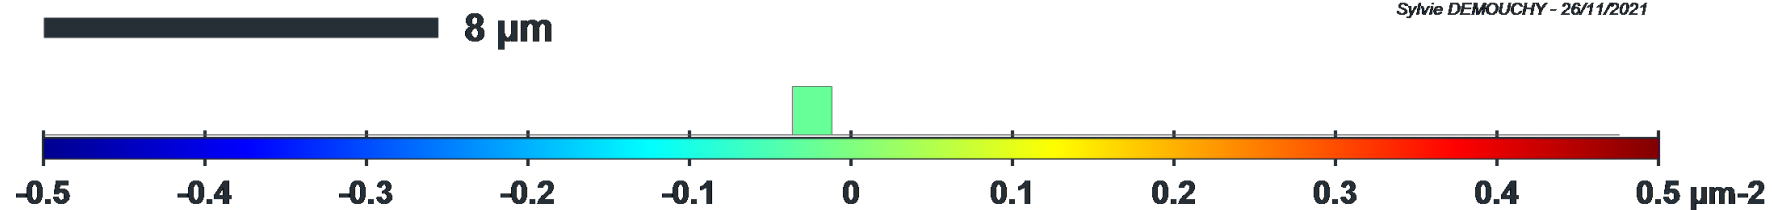

Step size: 0.07 $\mu$ m Resolution: 468x230 Index. Rate: 96% Magnification: x3000 Tension: 17kV

Minimum: -0.5 Maximum: 0.5 Average: 0 S. Dev: 0.2

## 23 component Of Disclination Tensor

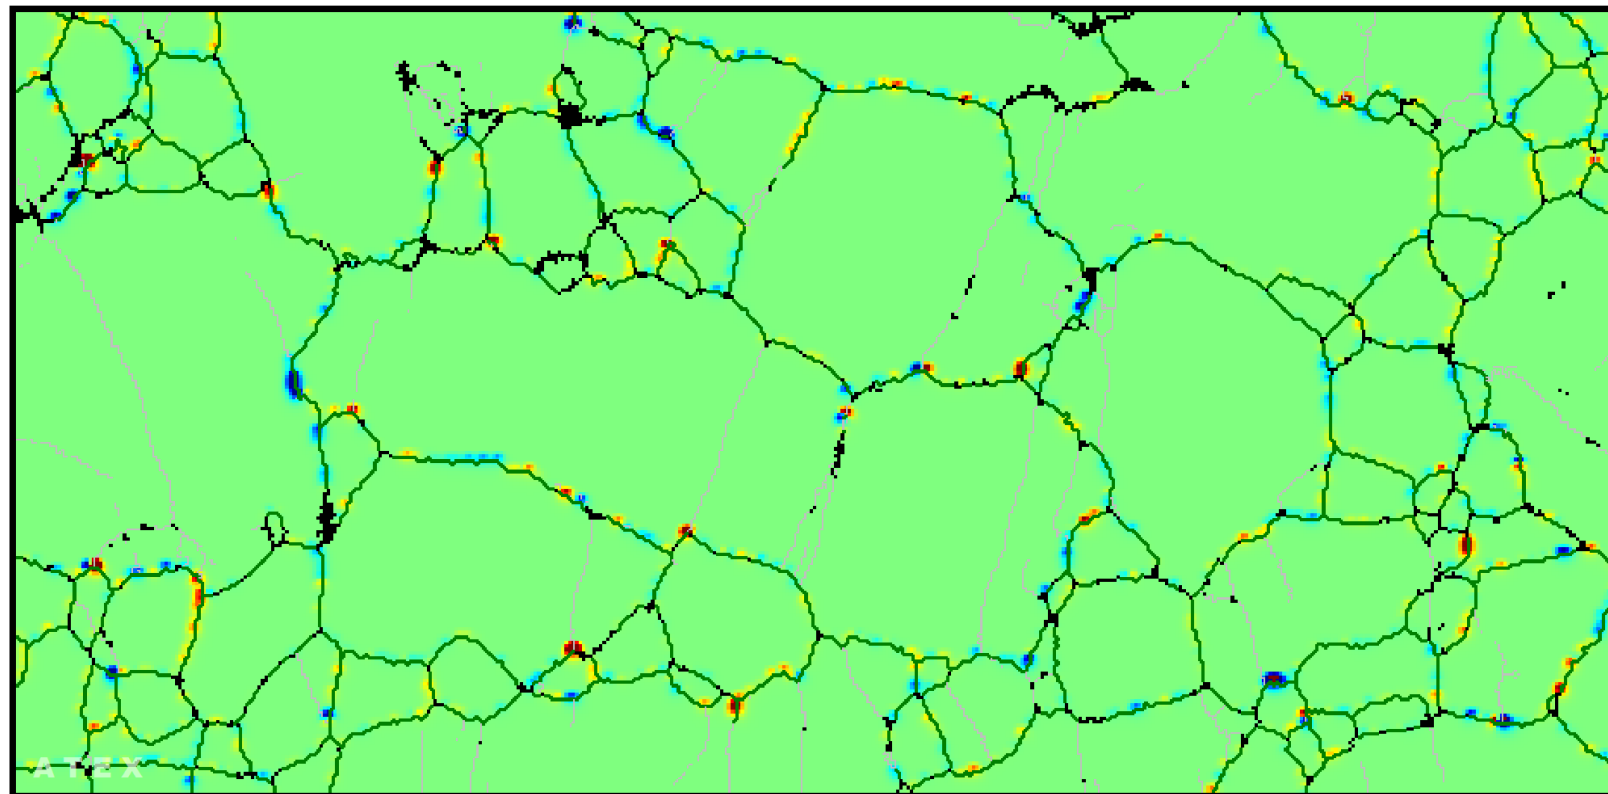

Sylvie DEMOUCY - 26/11/2021

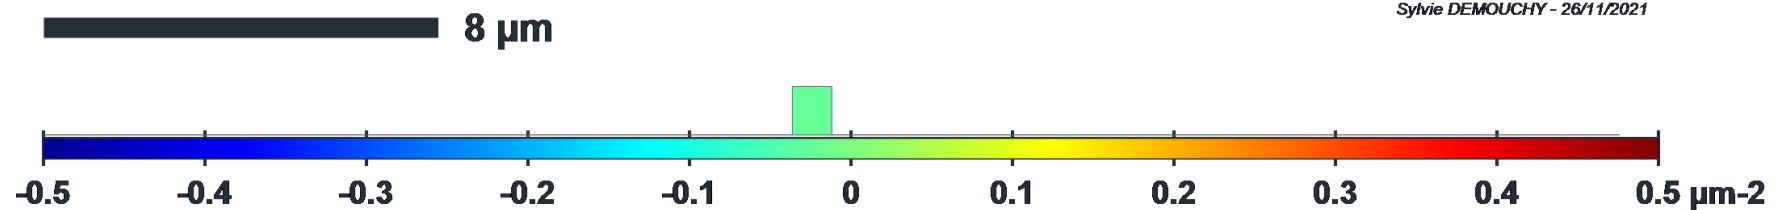

Step size: 0.07μm Resolution: 468x230 Index. Rate: 96% Magnification: x3000 Tension: 17kV

Minimum: -0.5 Maximum: 0.5 Average: 0 S. Dev: 0.23

### 33 component Of Disclination Tensor

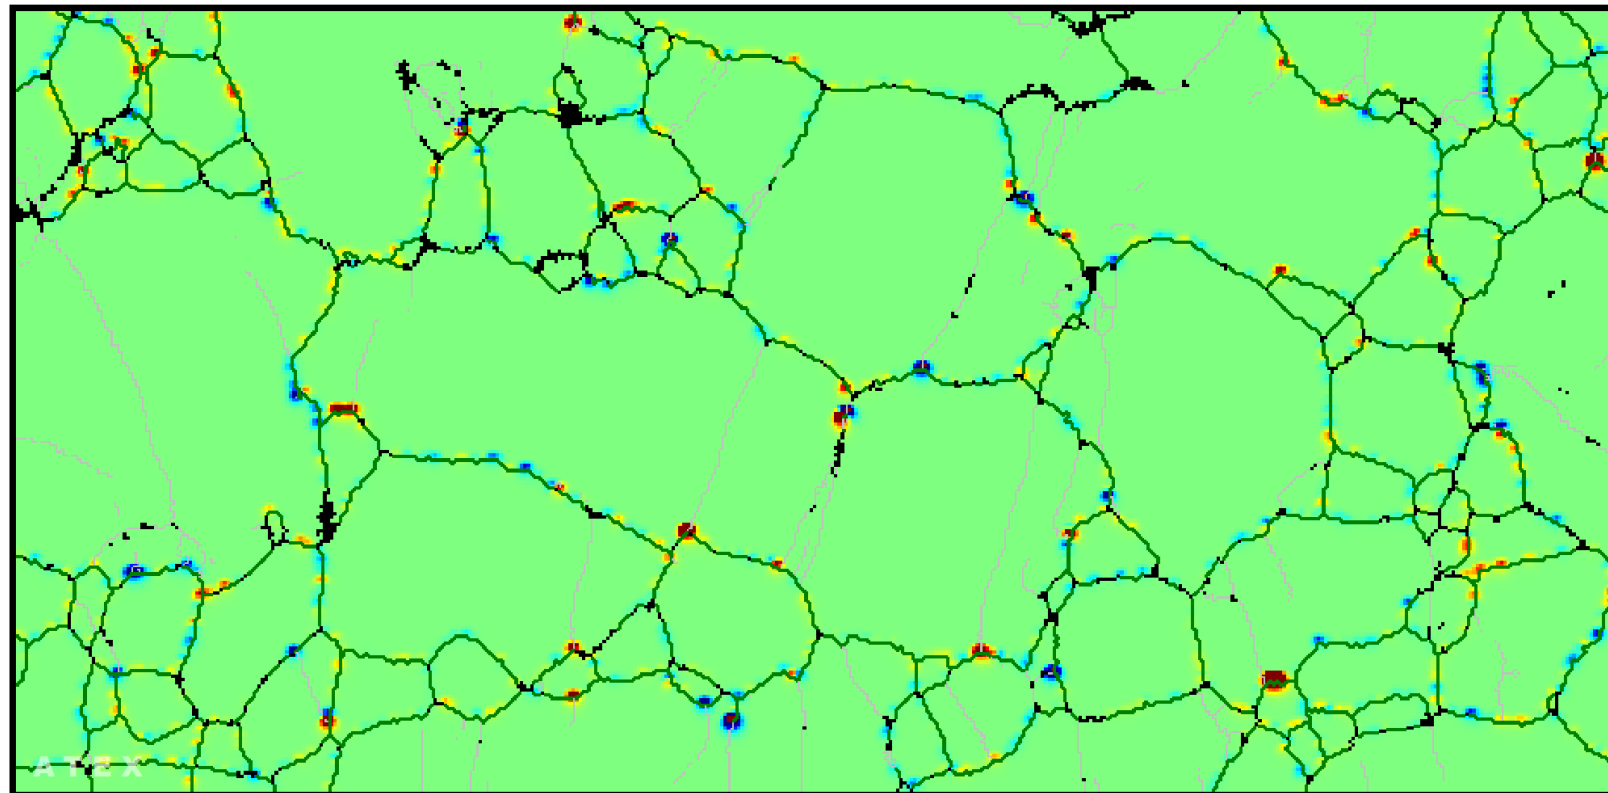

Sylvie DEMOUCY - 26/11/2021

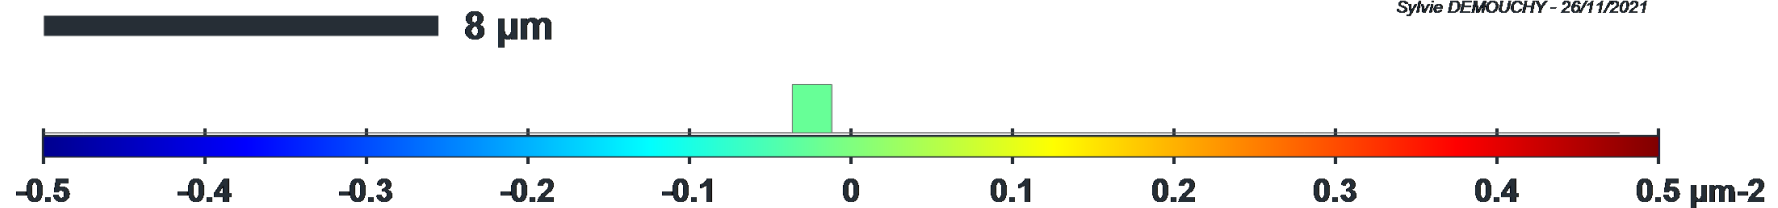

Step size: 0.07 $\mu\text{m}$  Resolution: 468x230 Index. Rate: 96% Magnification: x3000 Tension: 17kV

Minimum: -0.5 Maximum: 0.5 Average: 0 S. Dev: 0.31

Entrywise Norm of the Nye Tensor

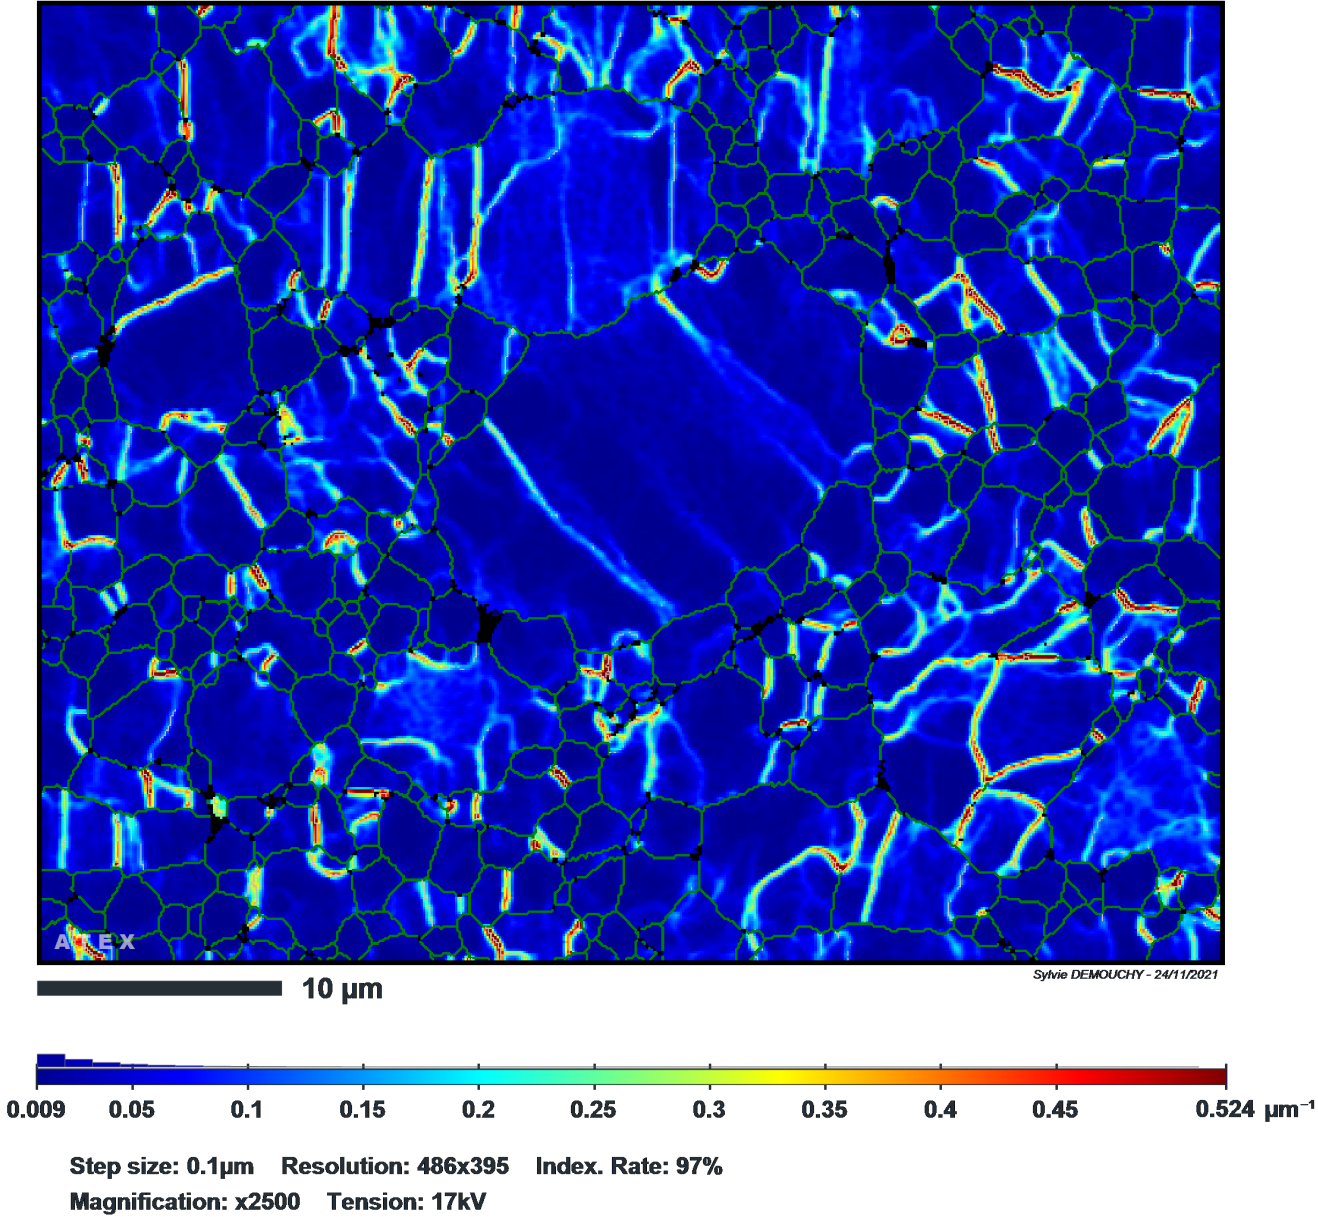

**13 component Of Disclination Tensor**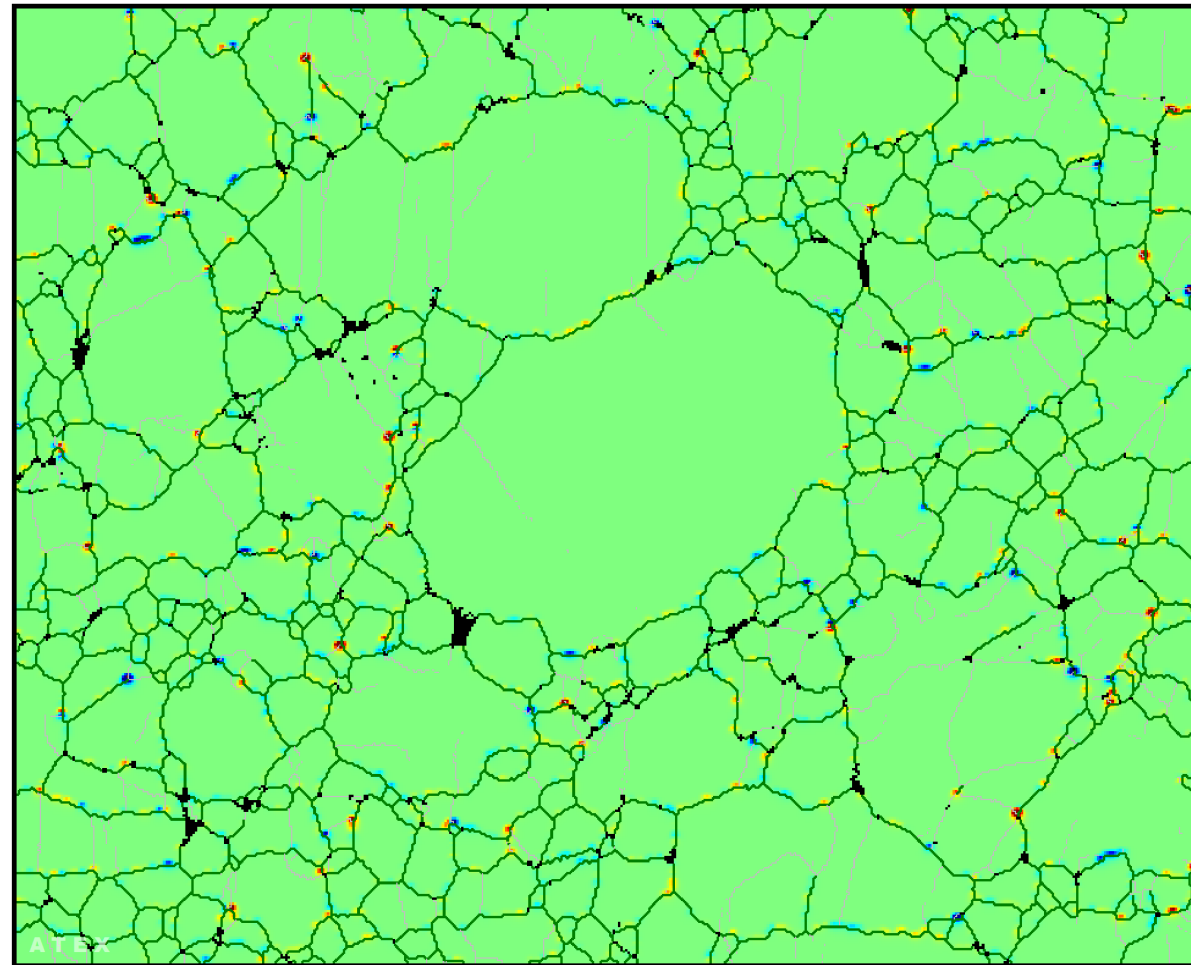

10  $\mu\text{m}$

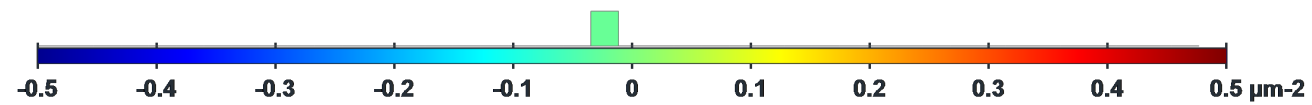

Step size: 0.1  $\mu\text{m}$  Resolution: 486x395 Index. Rate: 97%

Magnification: x2500 Tension: 17kV

**23 component Of Disclination Tensor**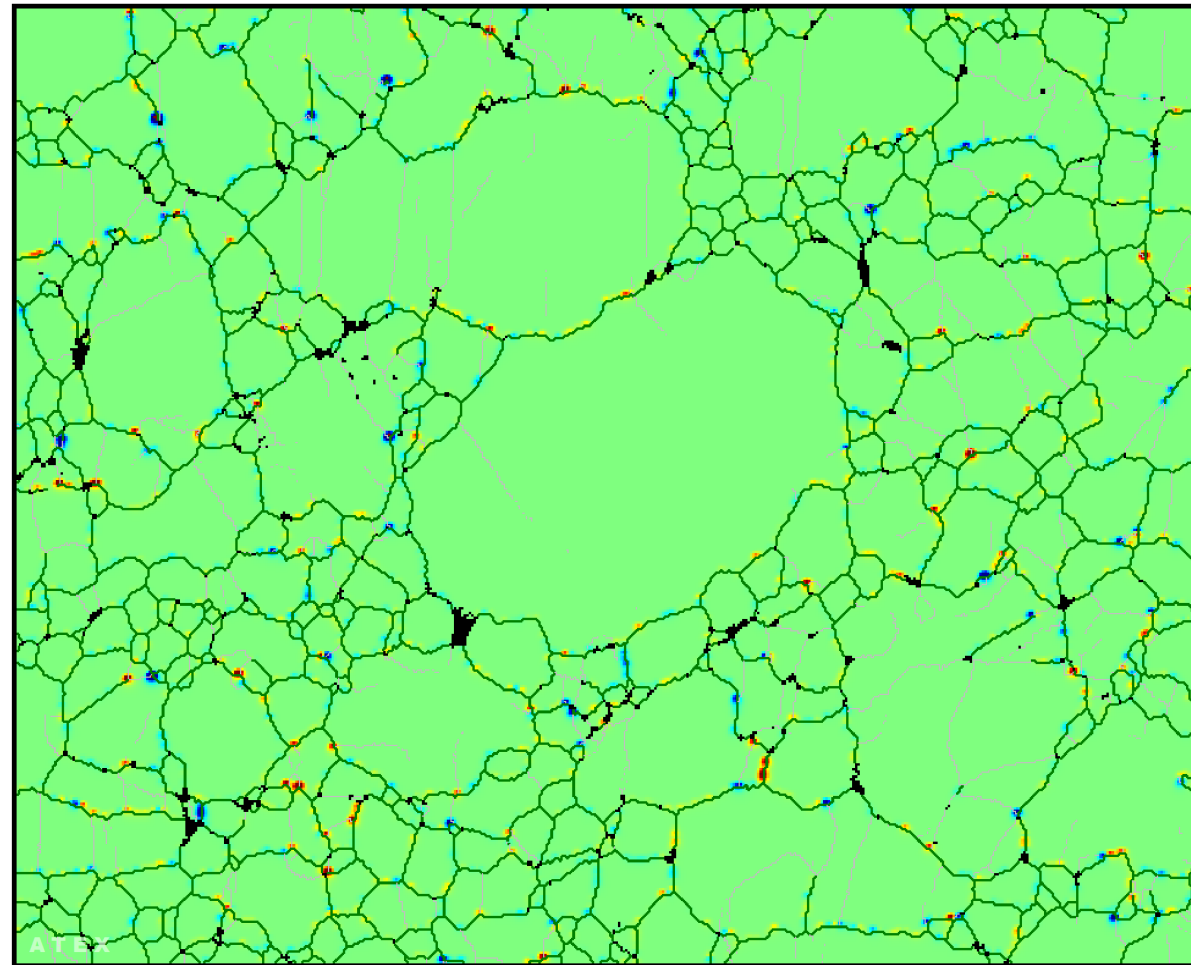

10  $\mu\text{m}$

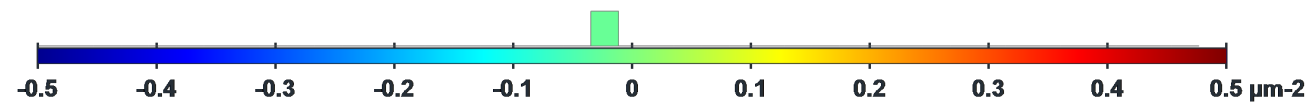

Step size: 0.1  $\mu\text{m}$  Resolution: 486x395 Index. Rate: 97%

Magnification: x2500 Tension: 17kV

**33 component Of Disclination Tensor**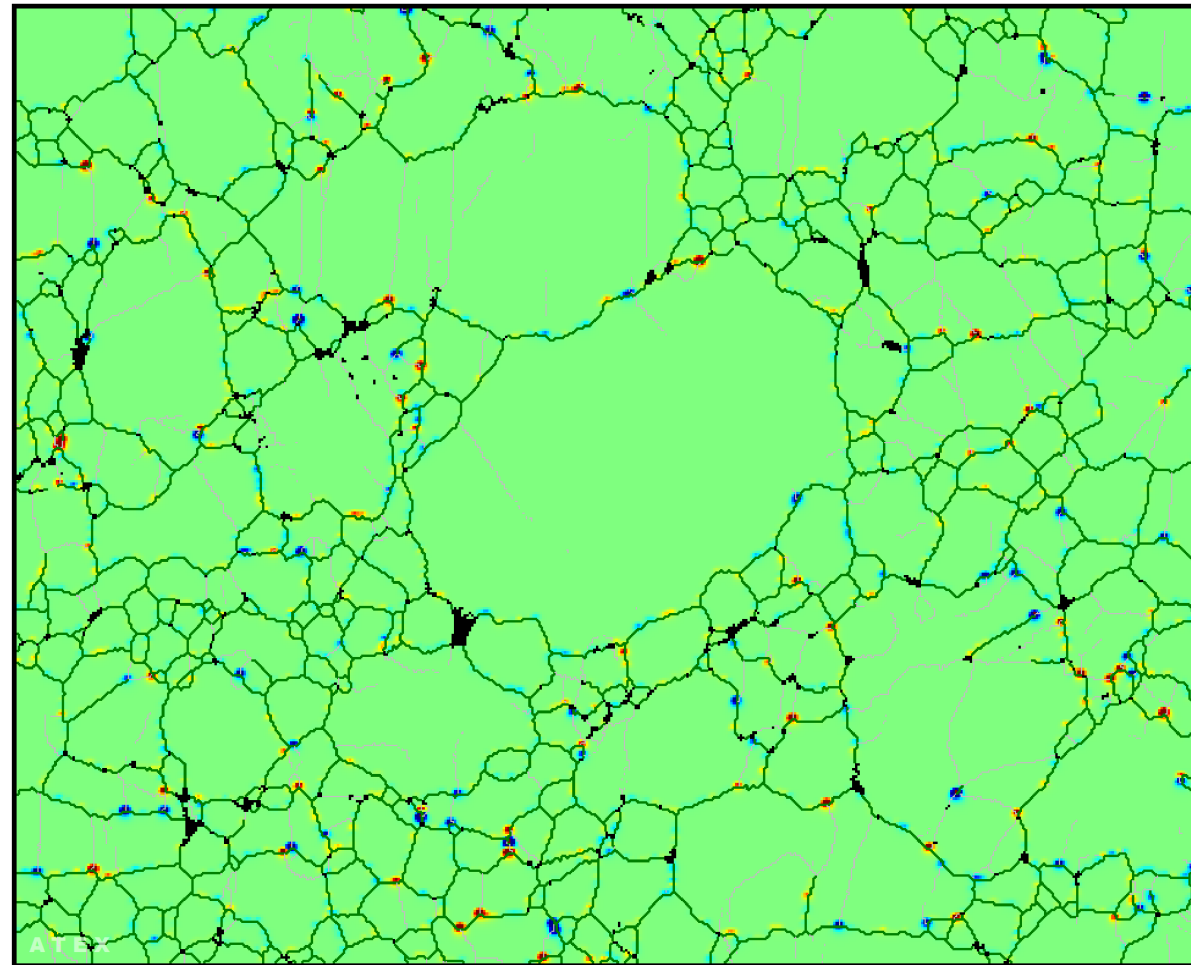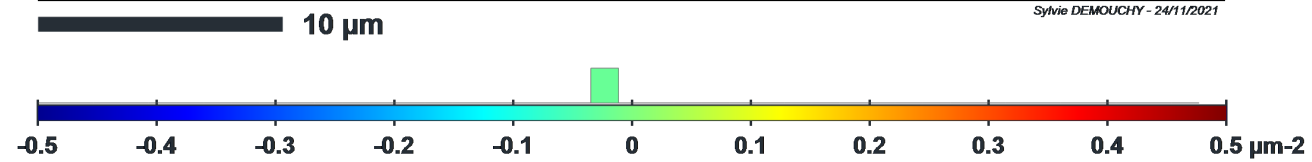

Step size: 0.1μm Resolution: 486x395 Index. Rate: 97%

Magnification: x2500 Tension: 17kV

Entrywise Norm of the Nye Tensor

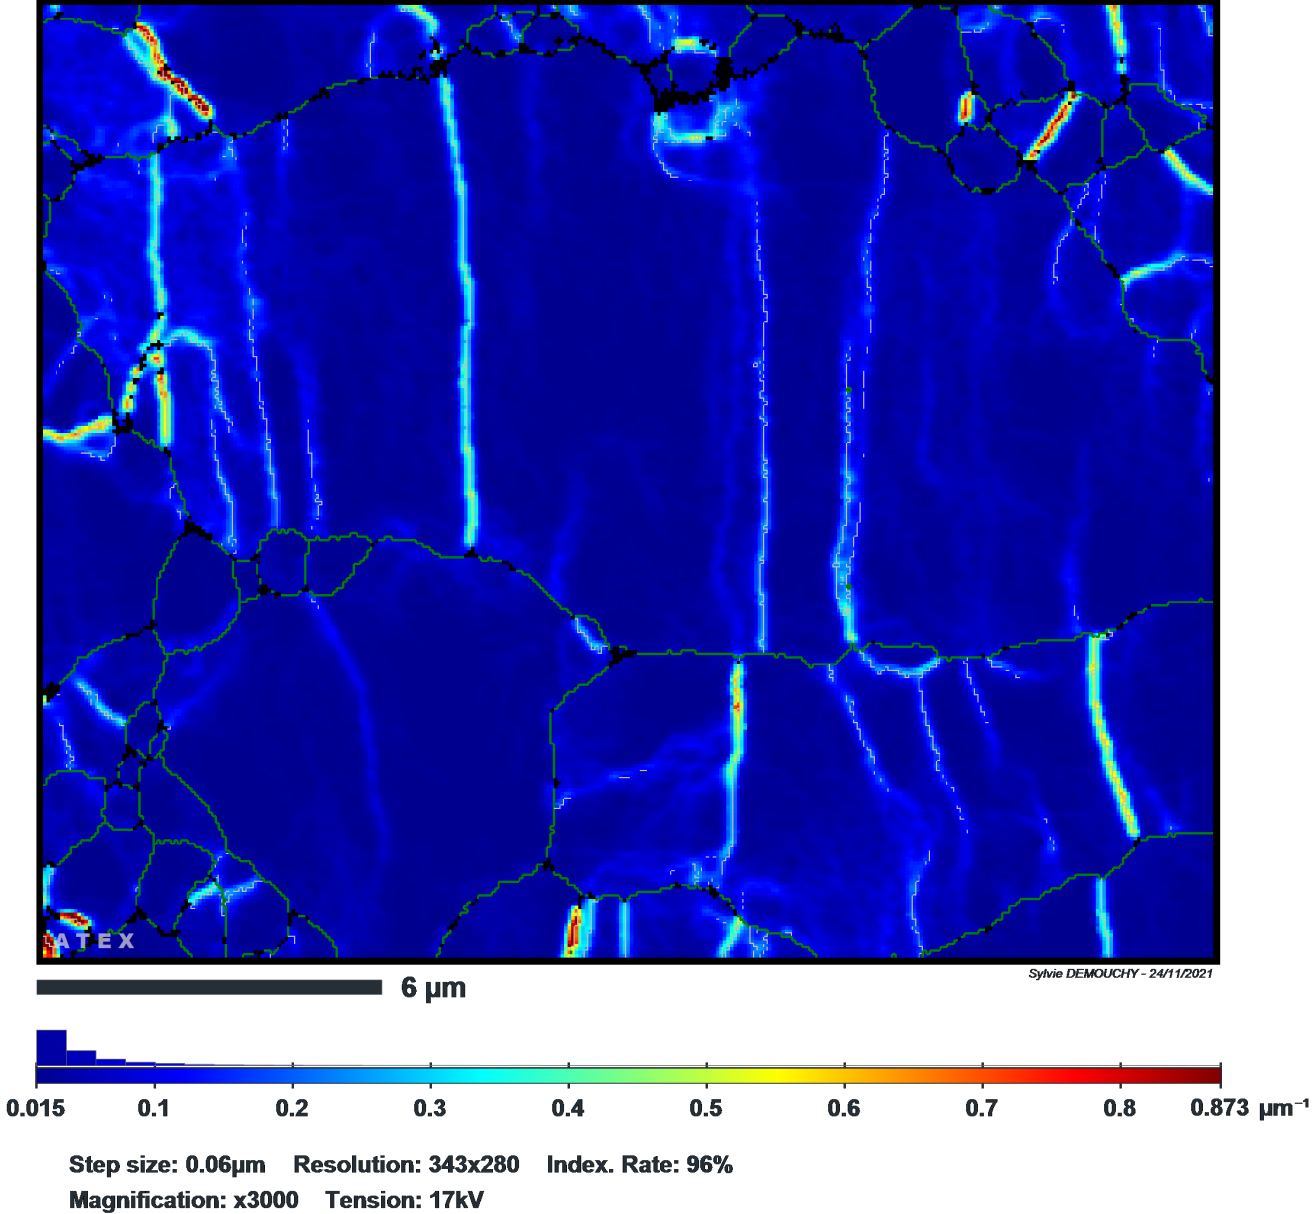

13 component Of Disclination Tensor

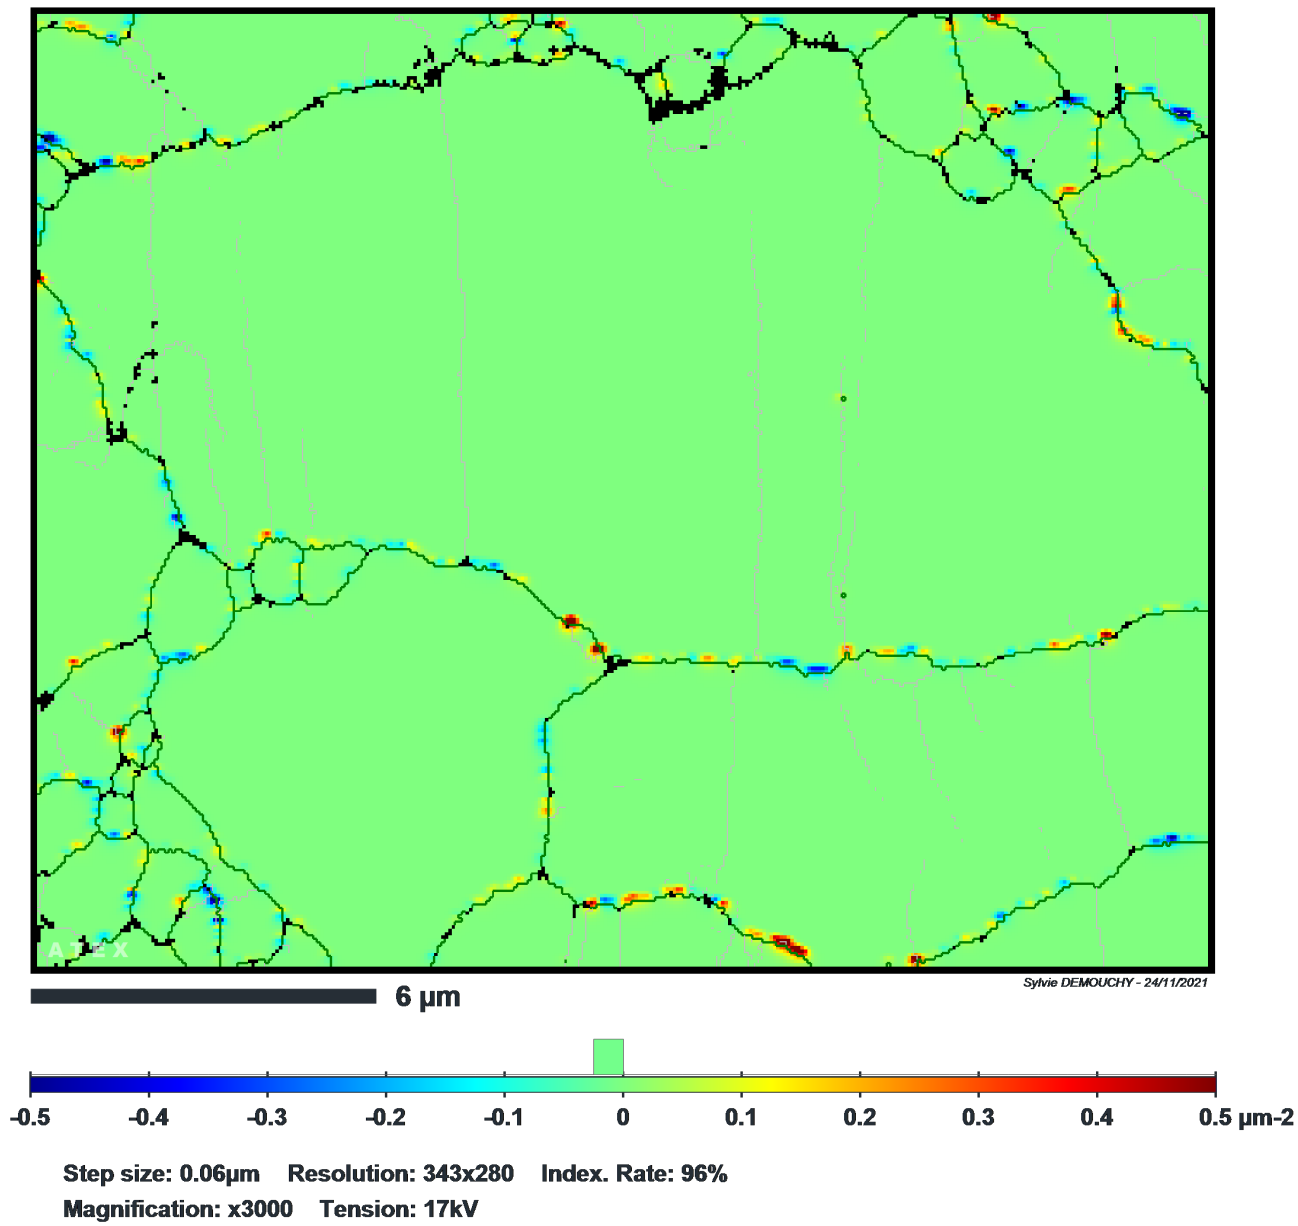

23 component Of Disclination Tensor

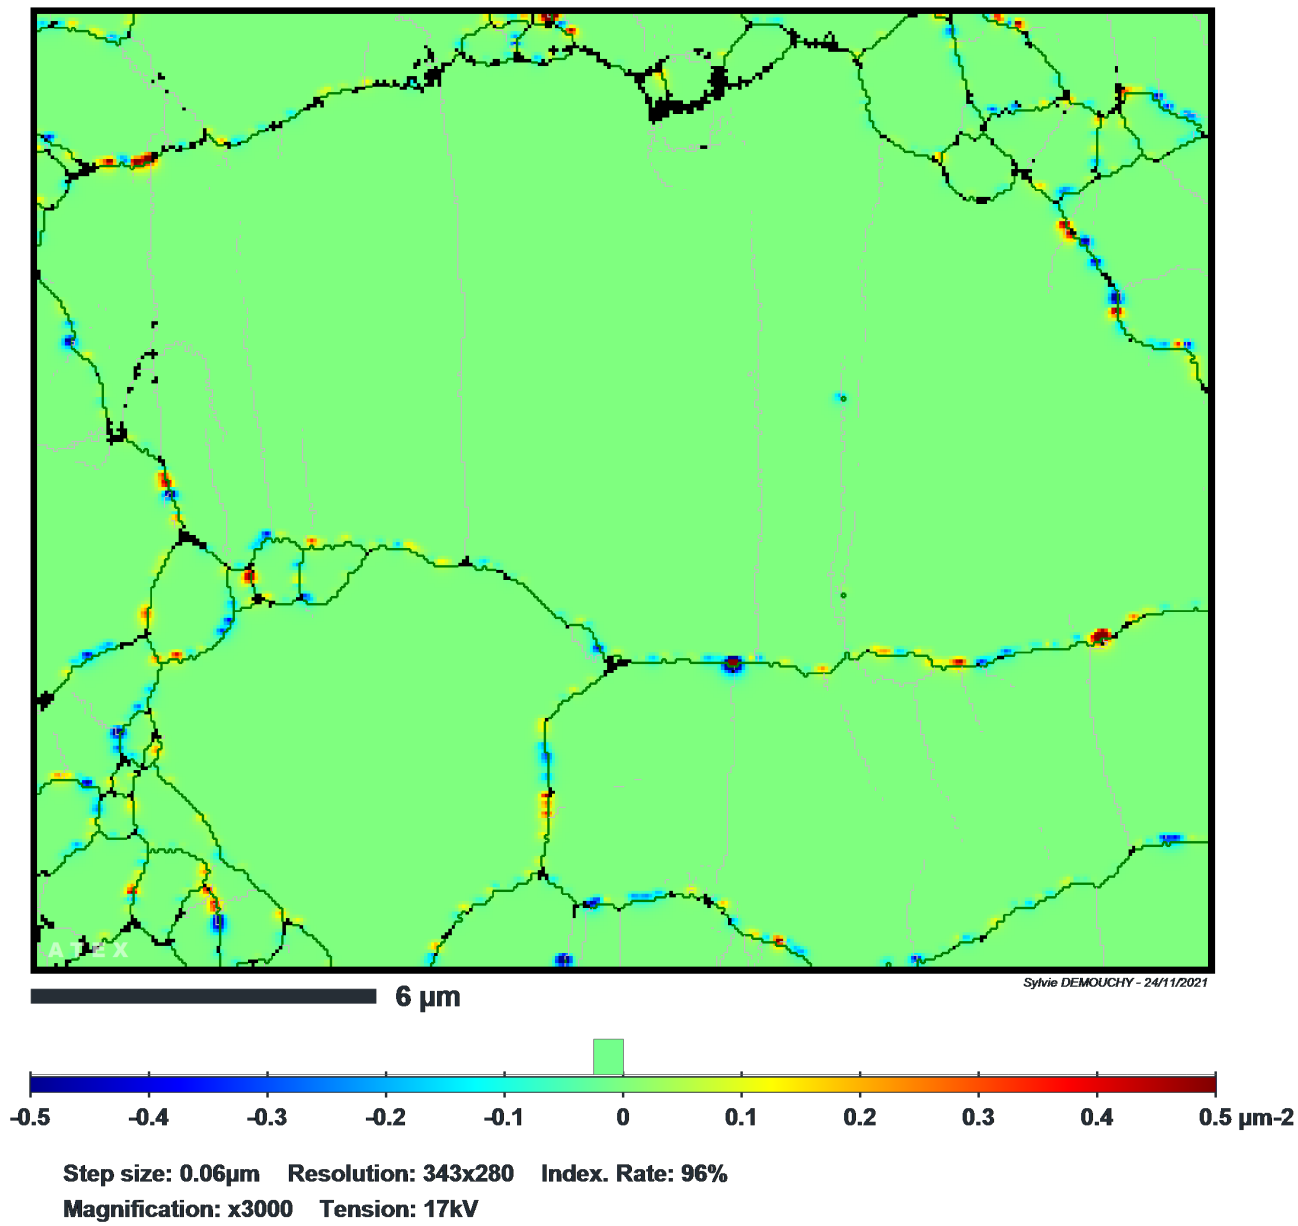

33 component Of Disclination Tensor

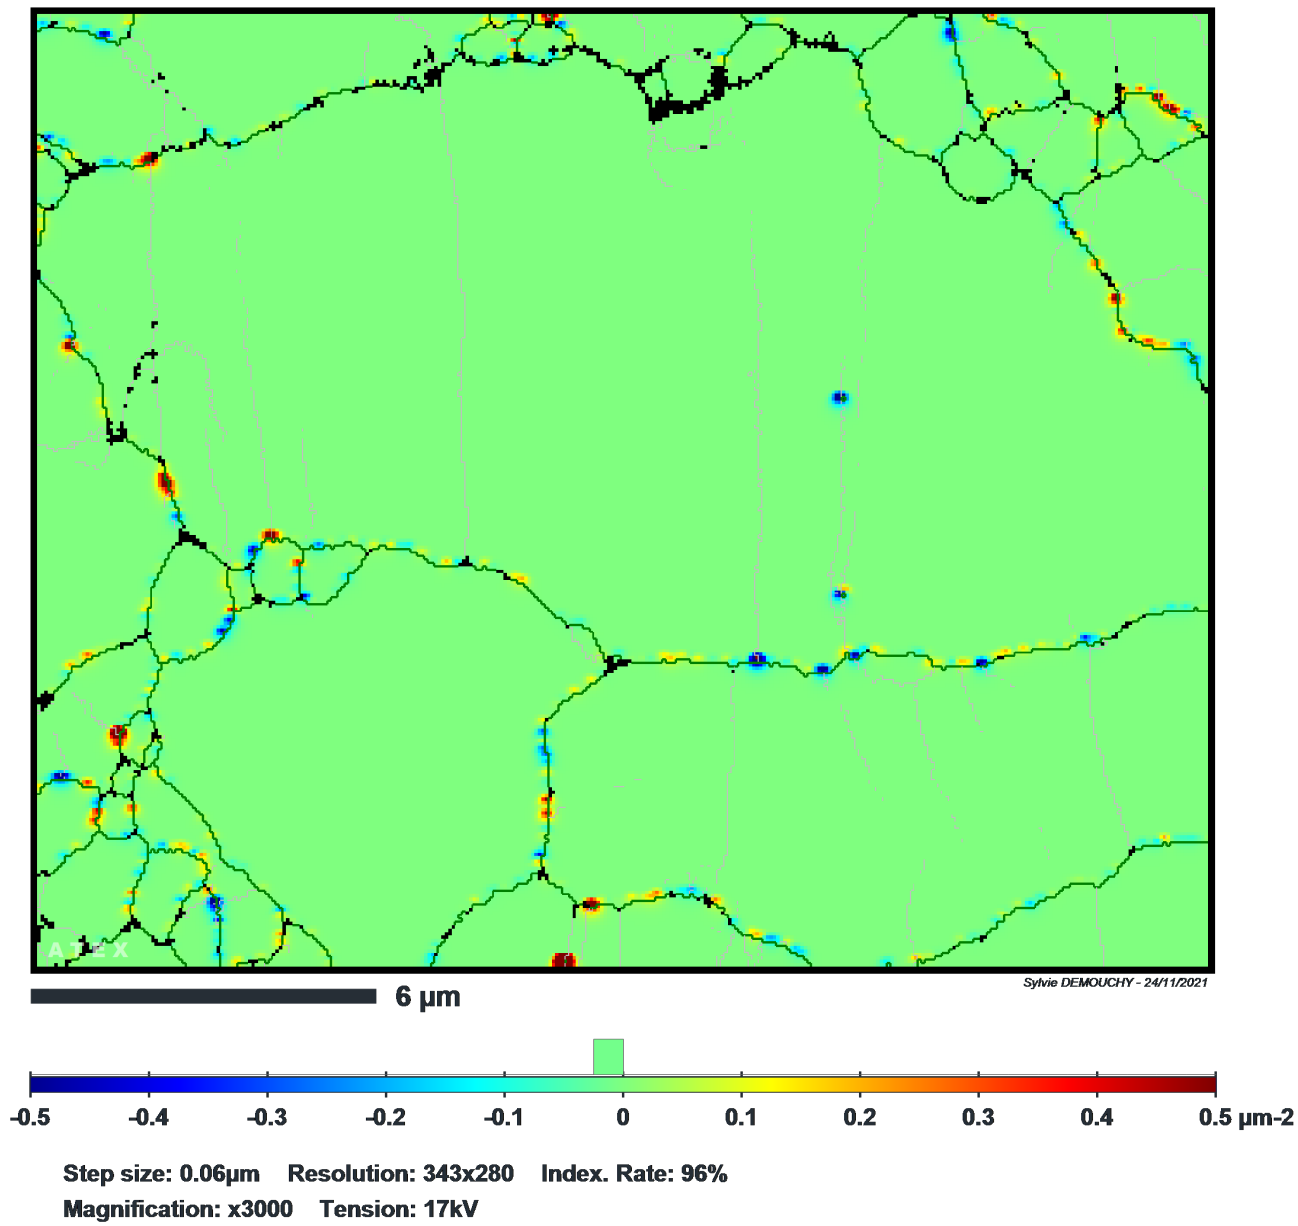

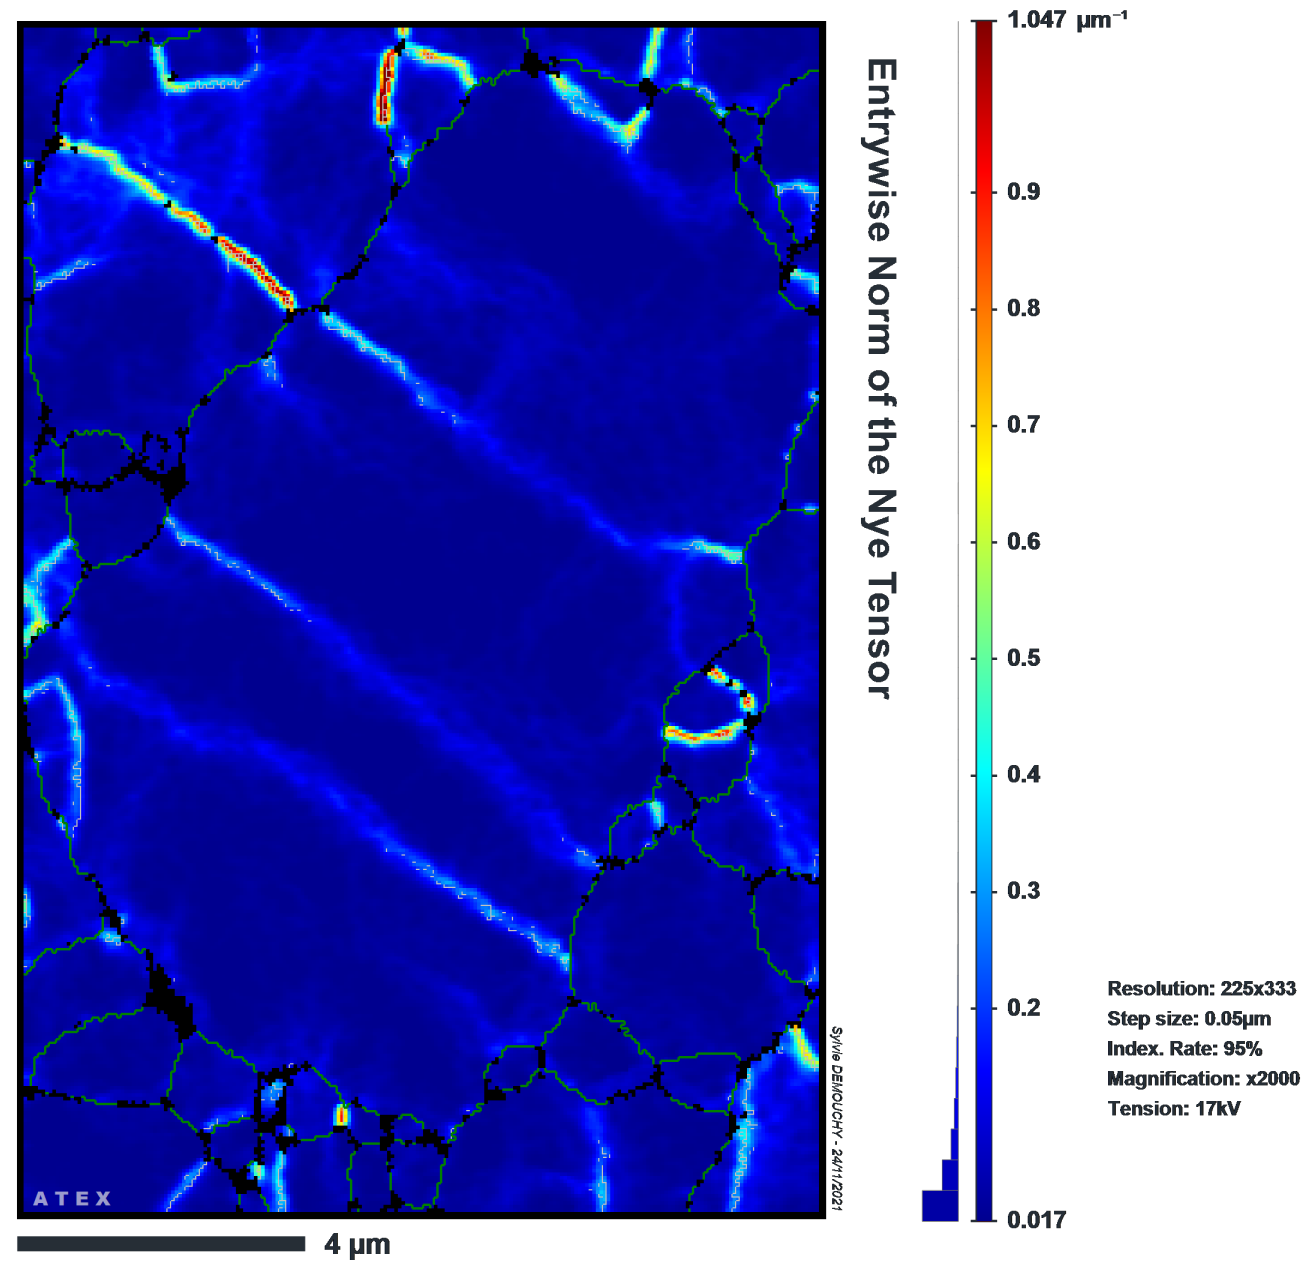

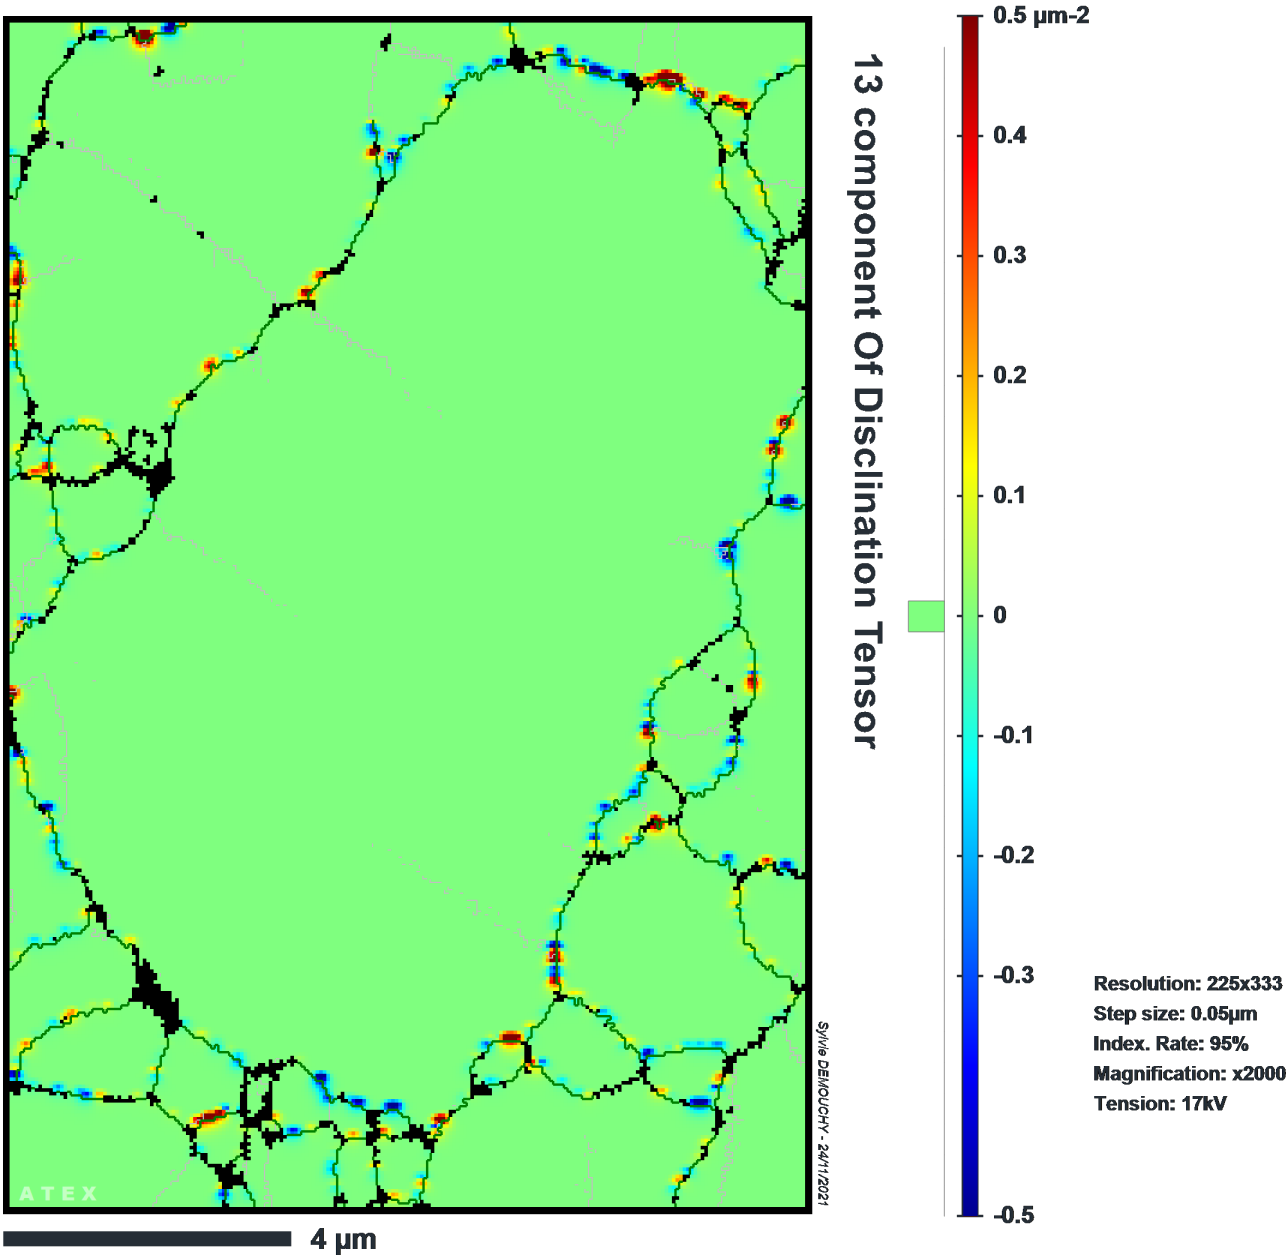

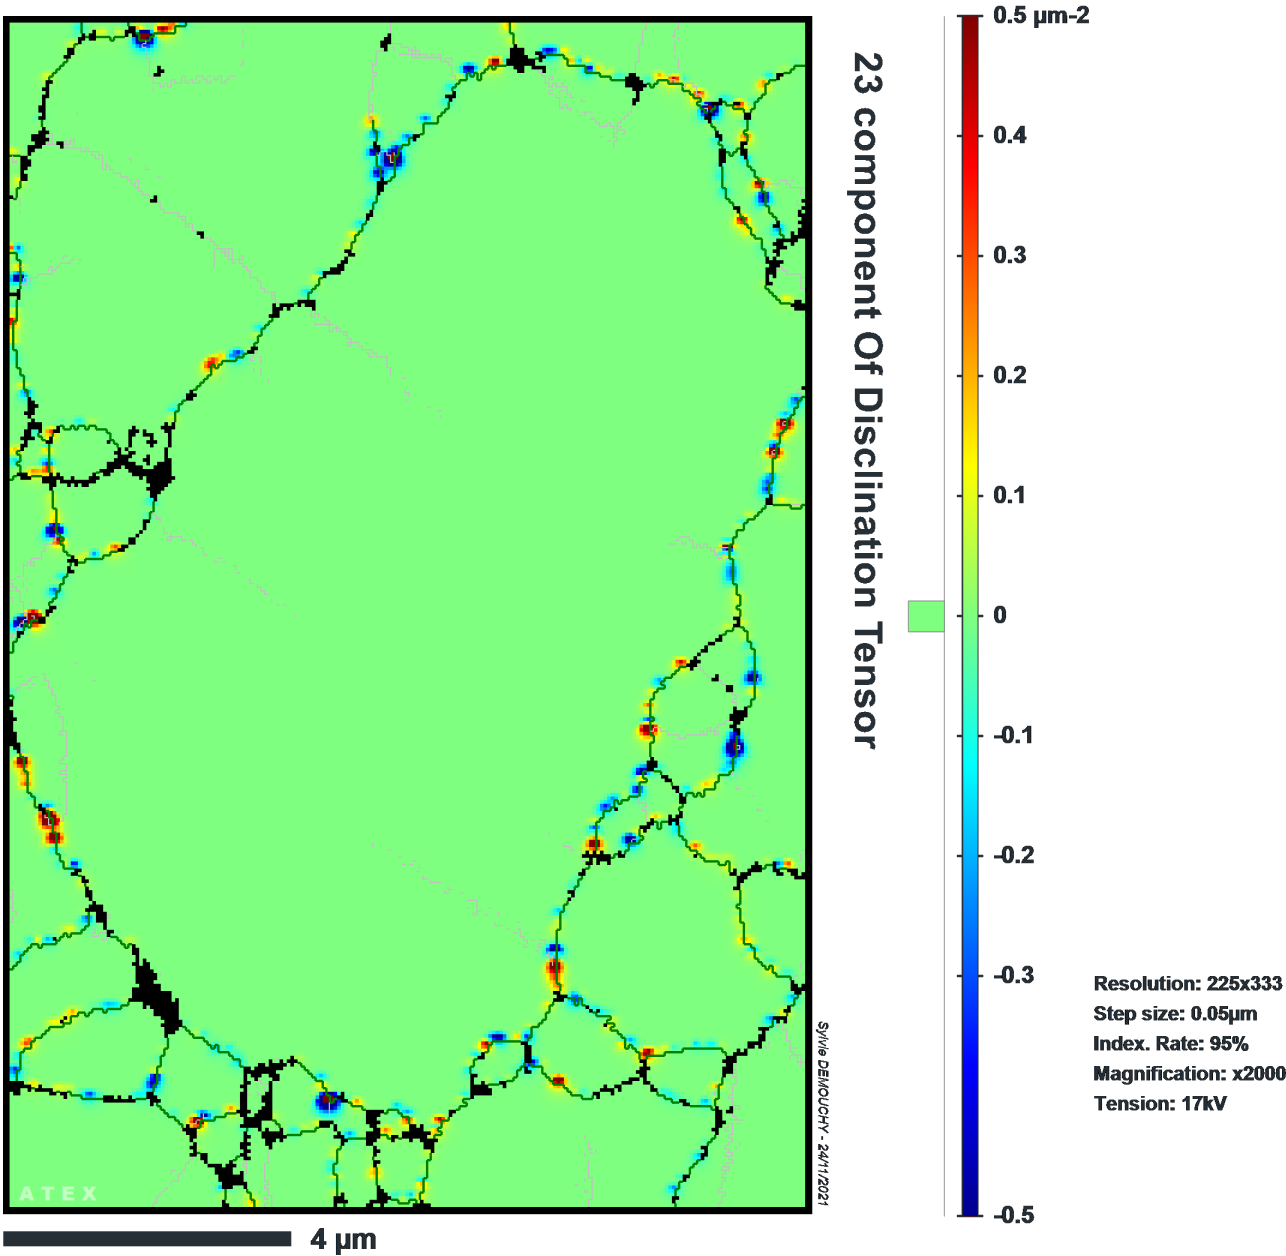

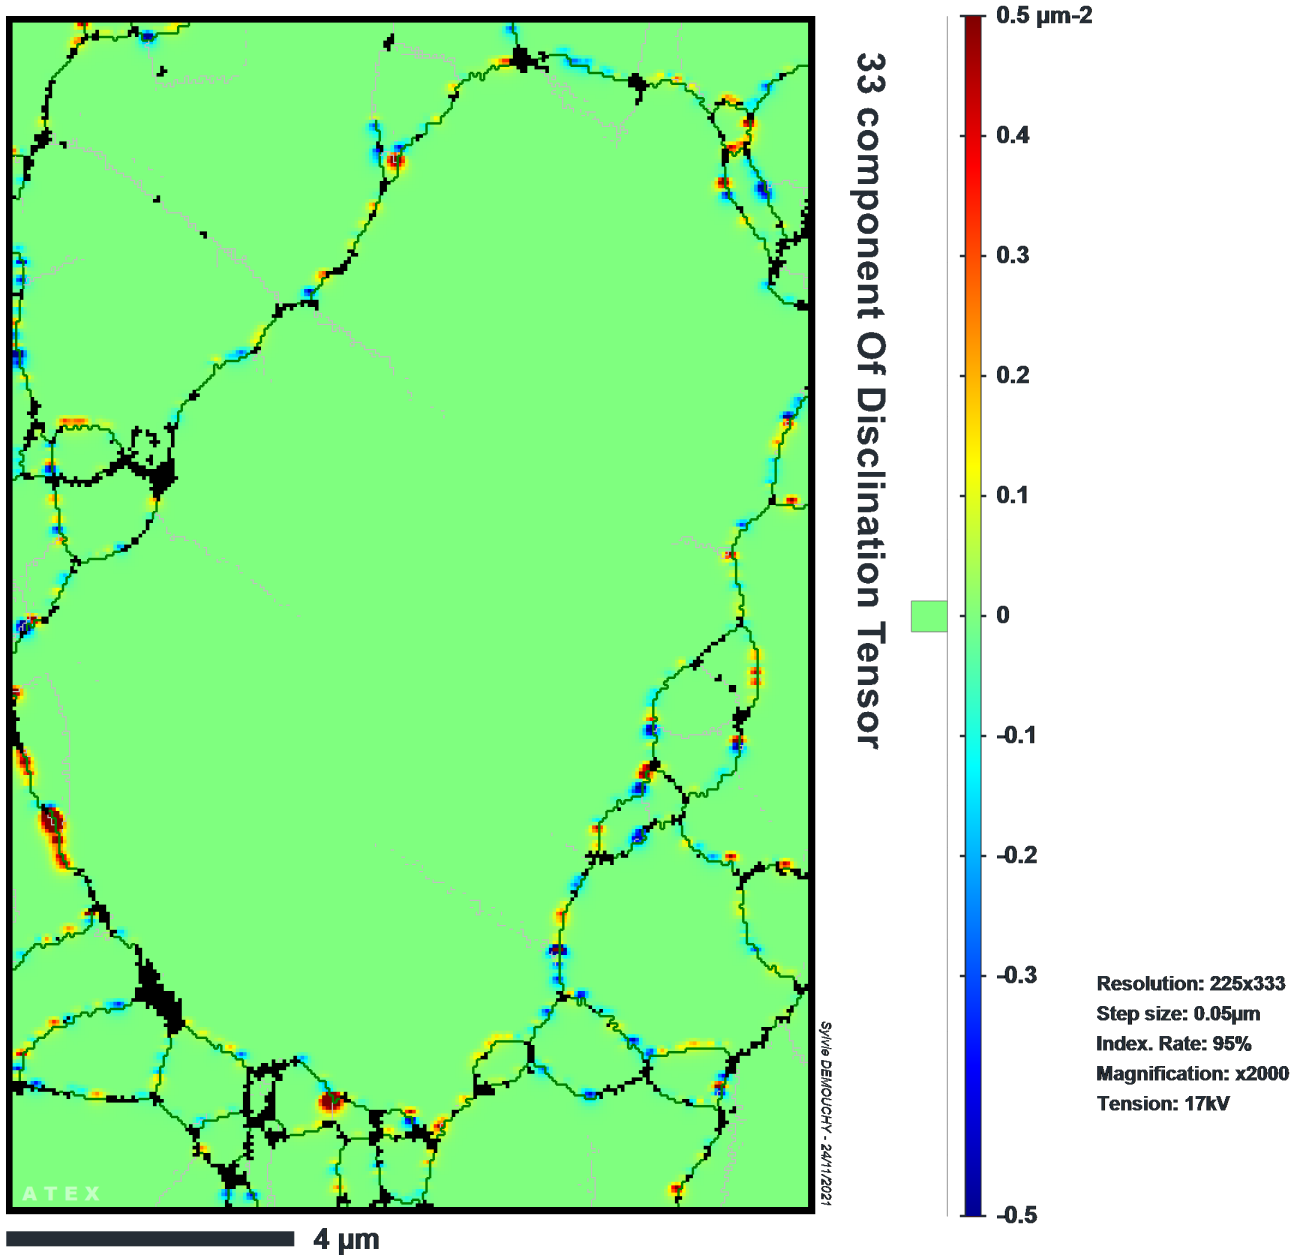

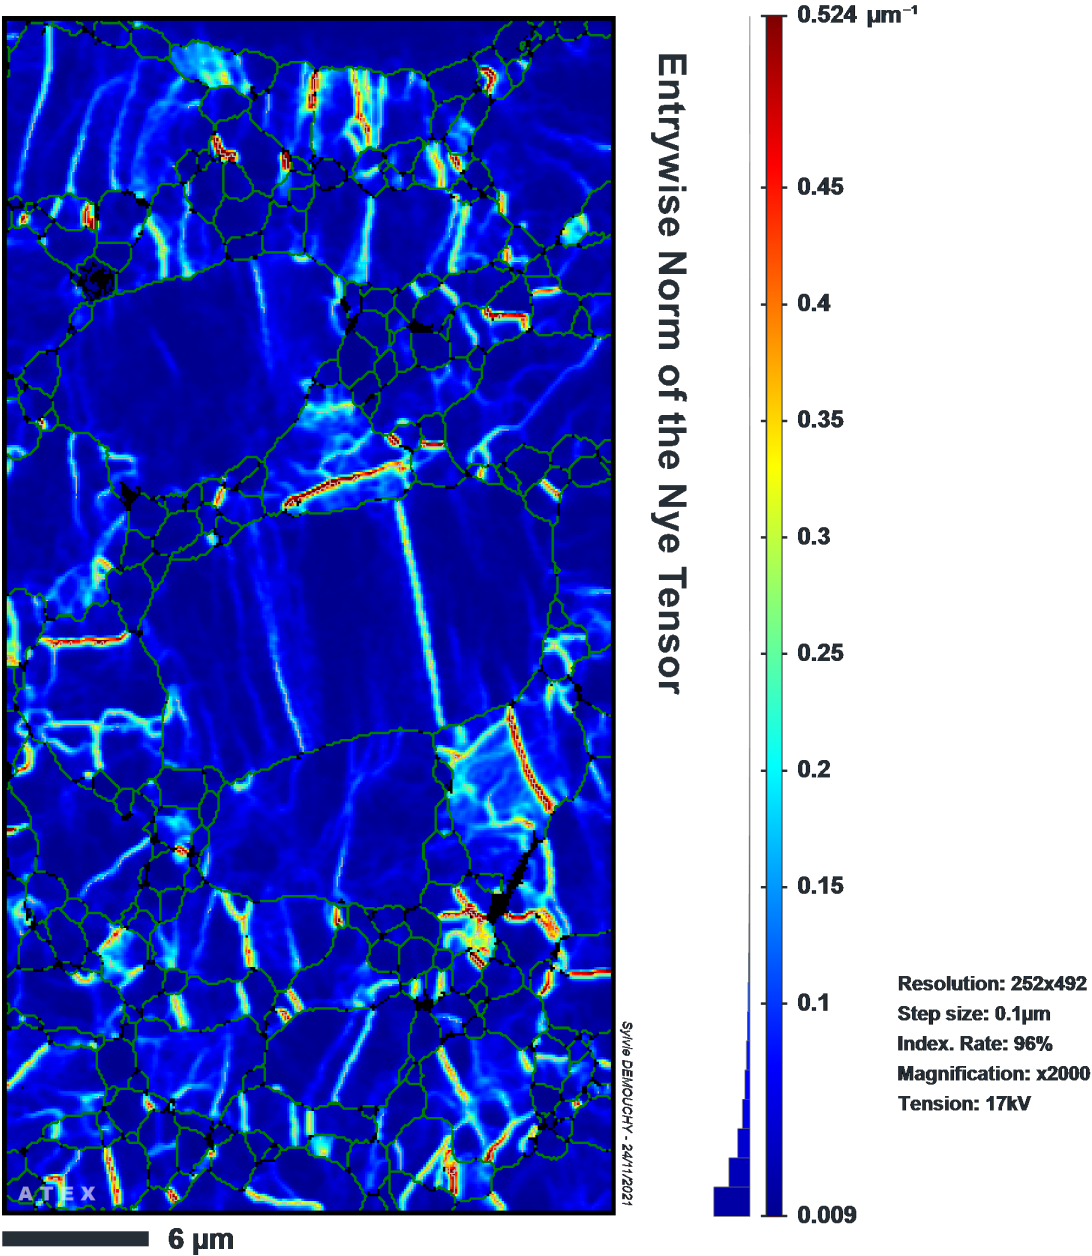

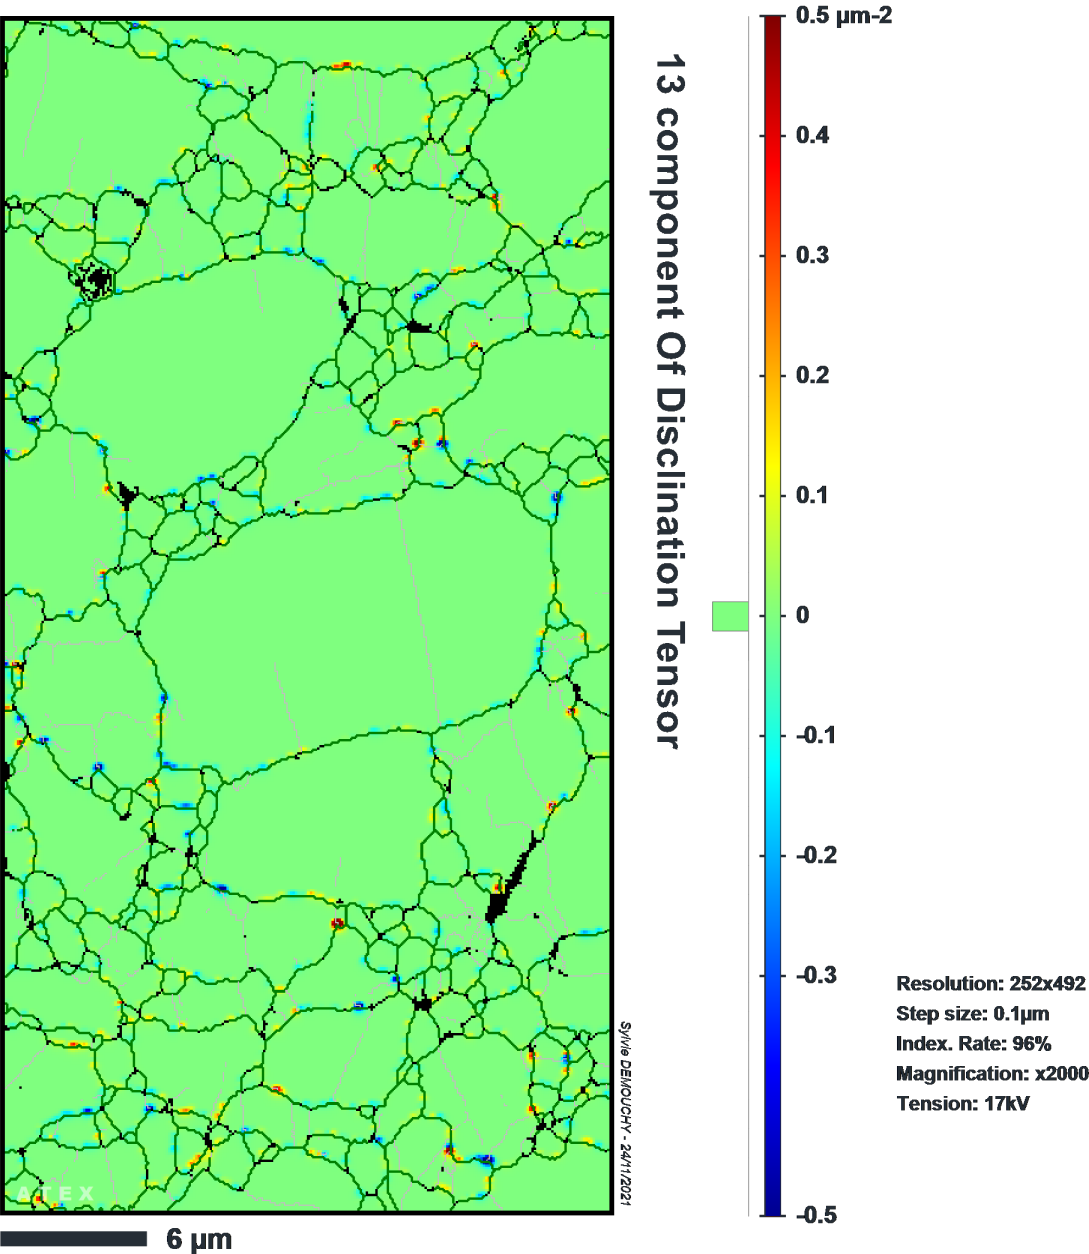

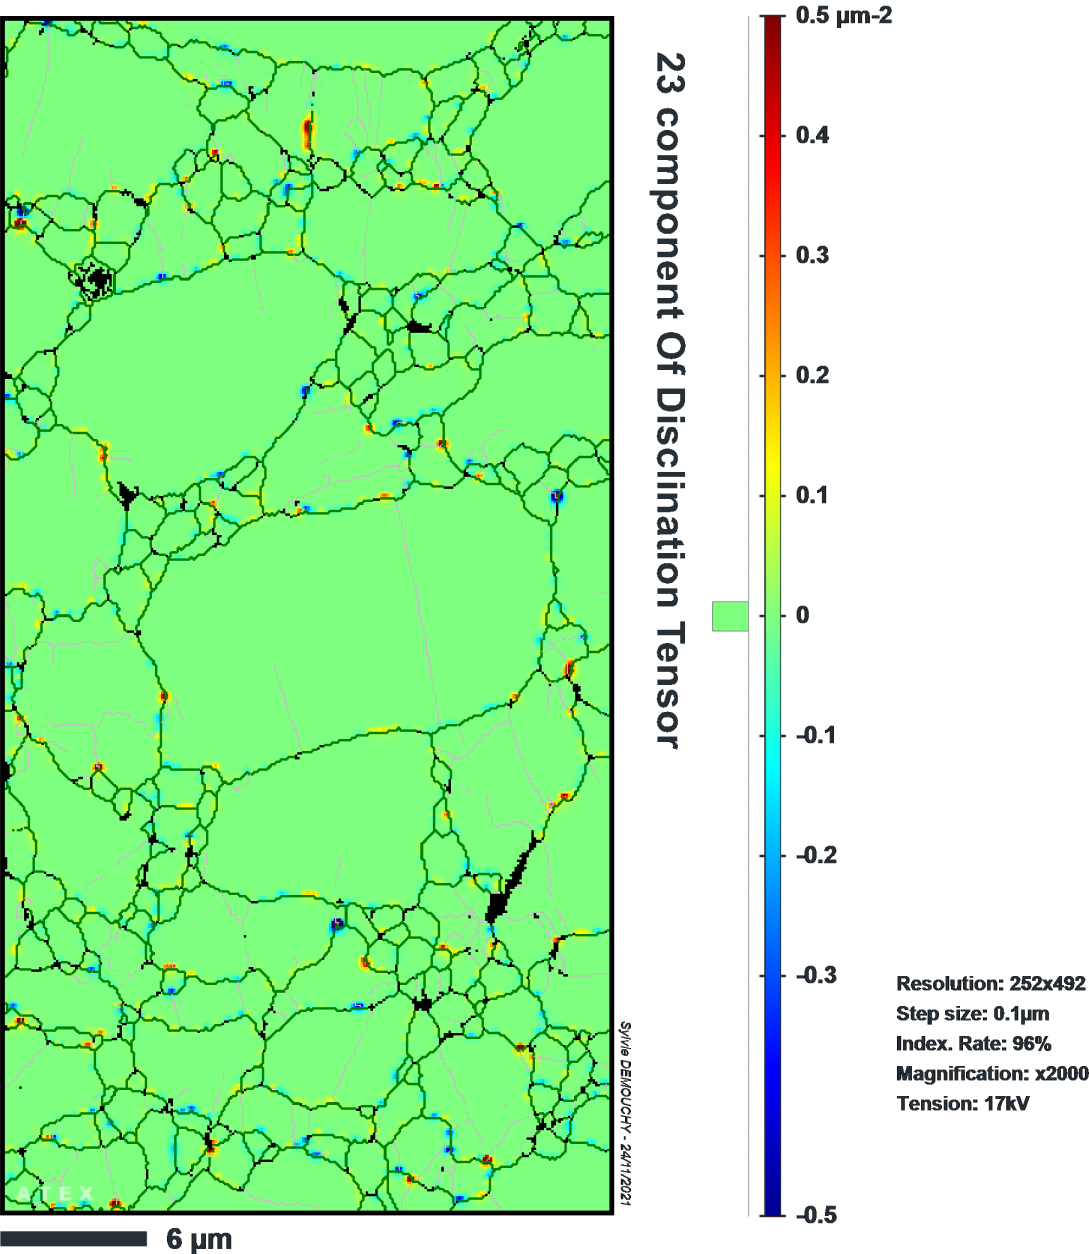

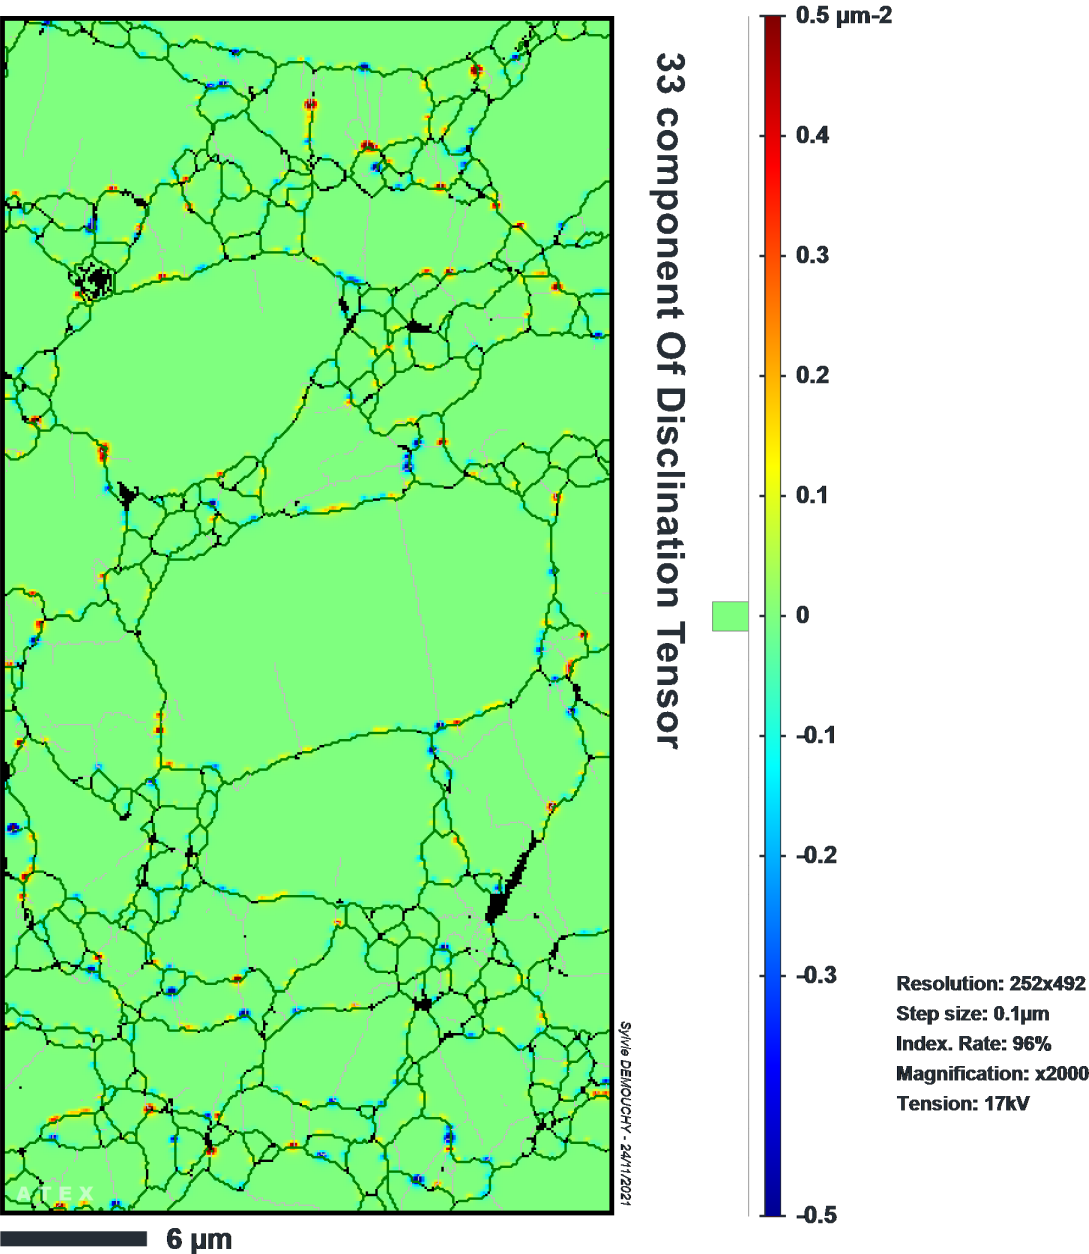

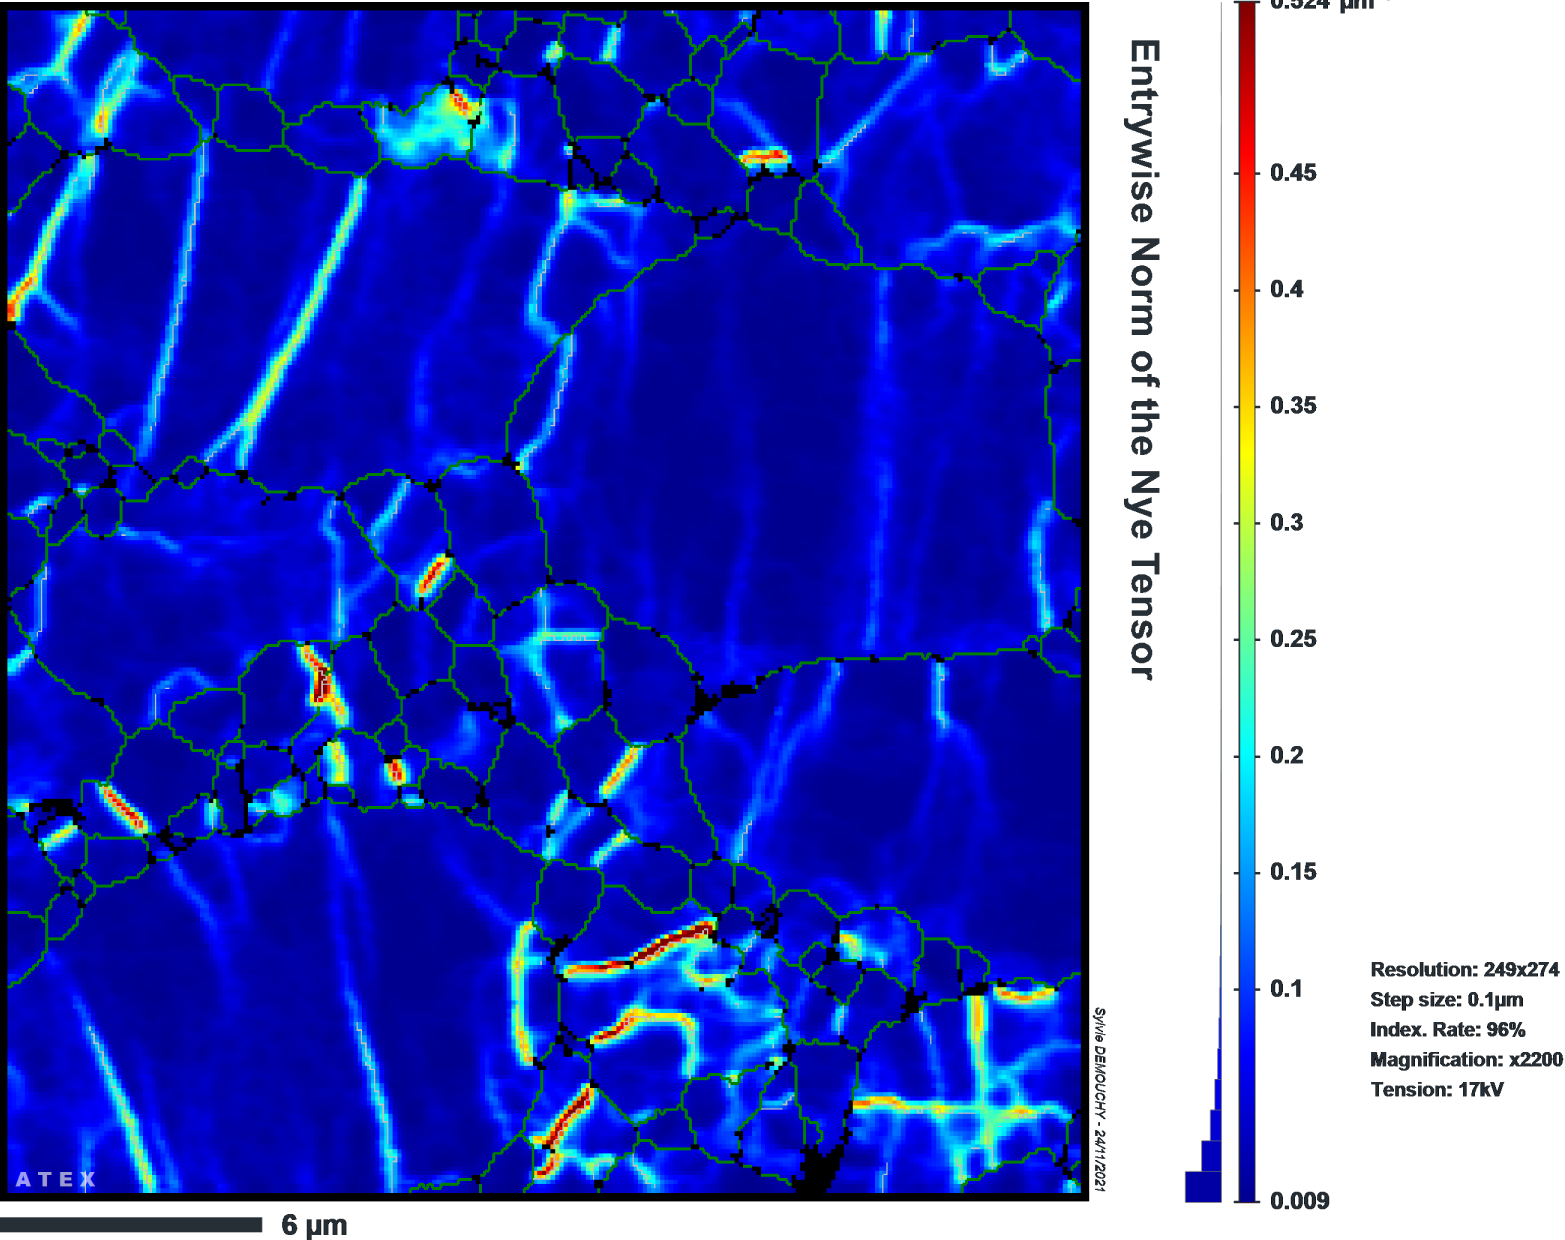

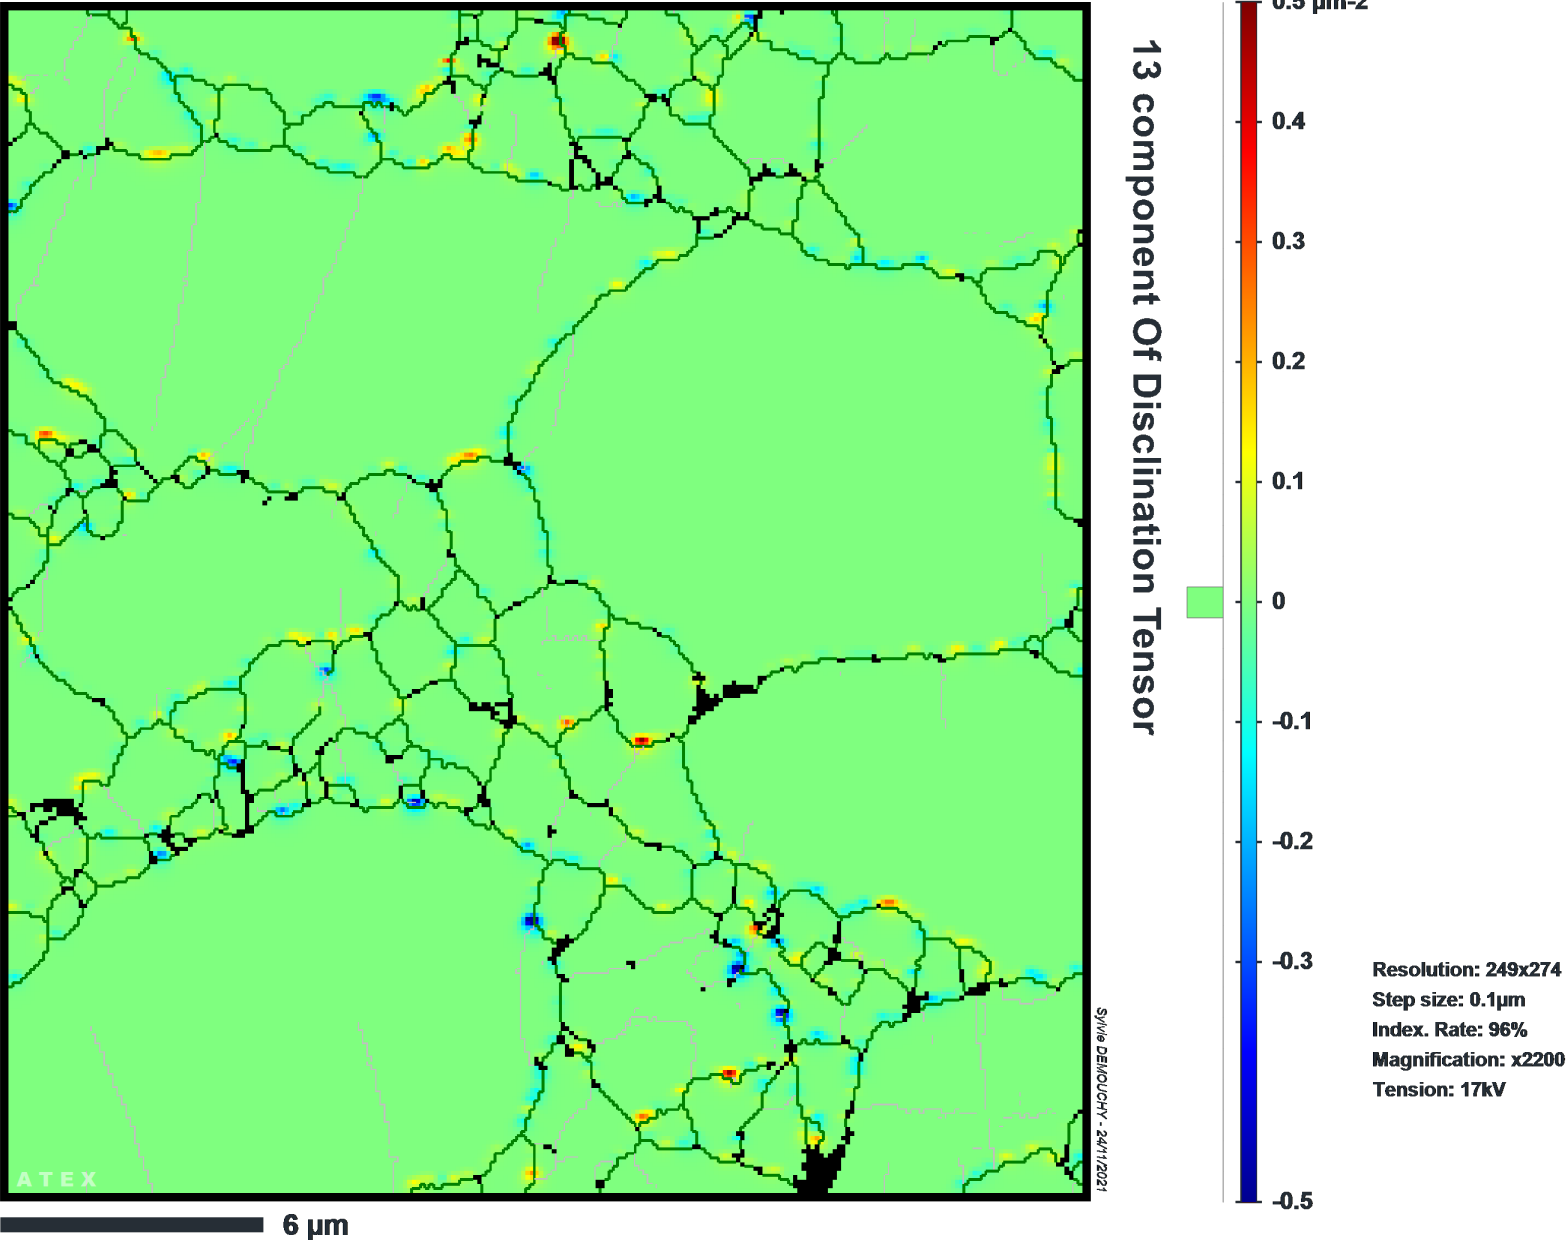

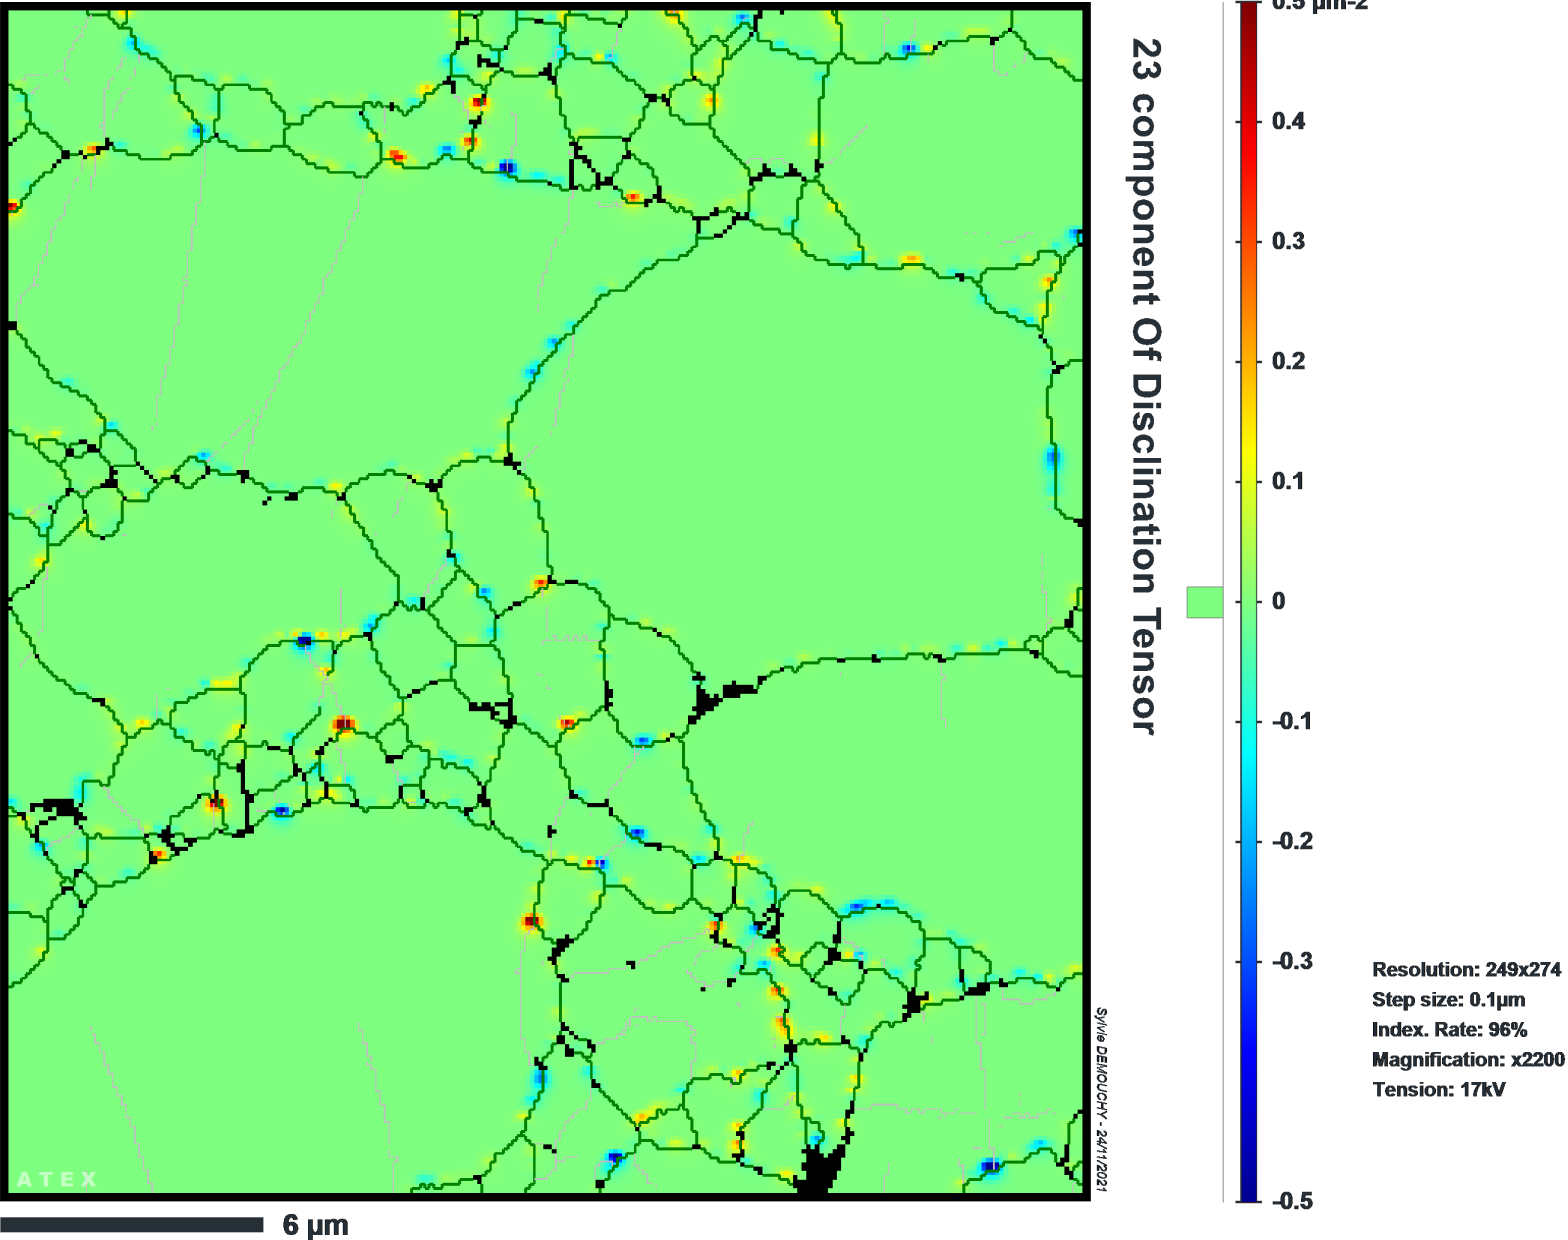

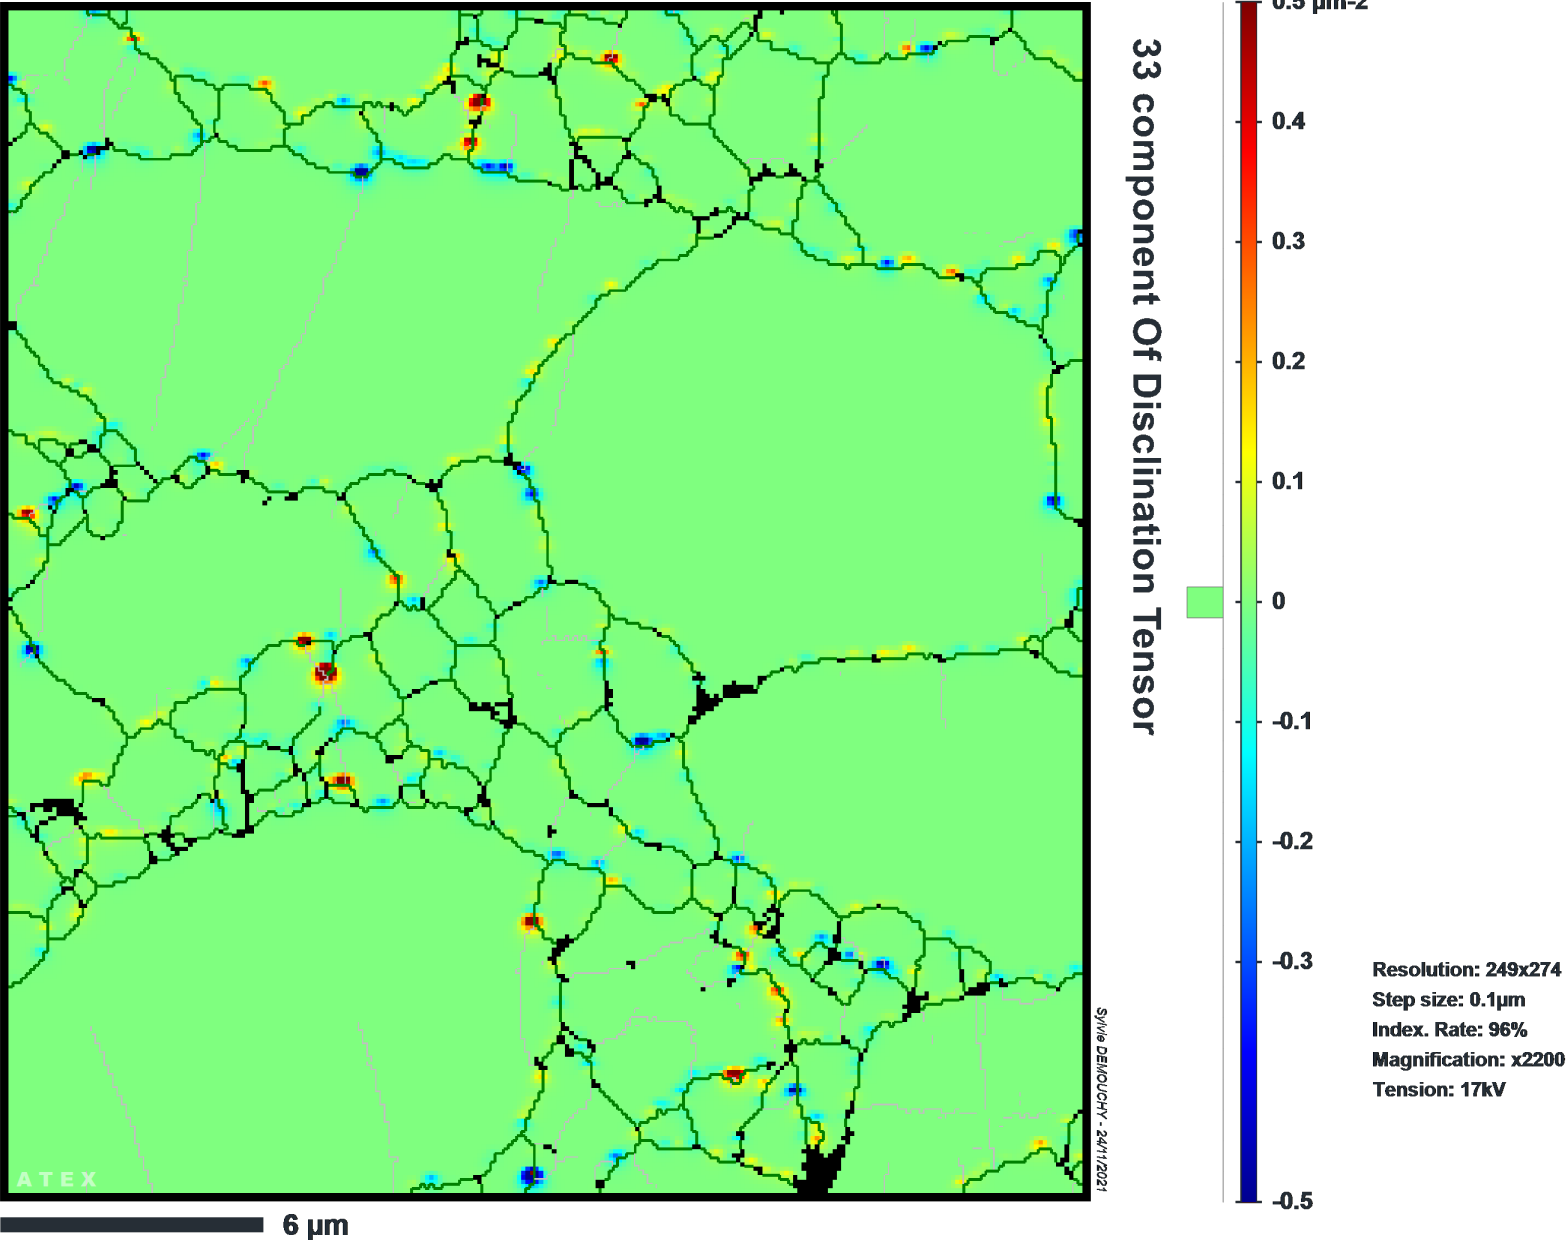

## Entrywise Norm of the Nye Tensor

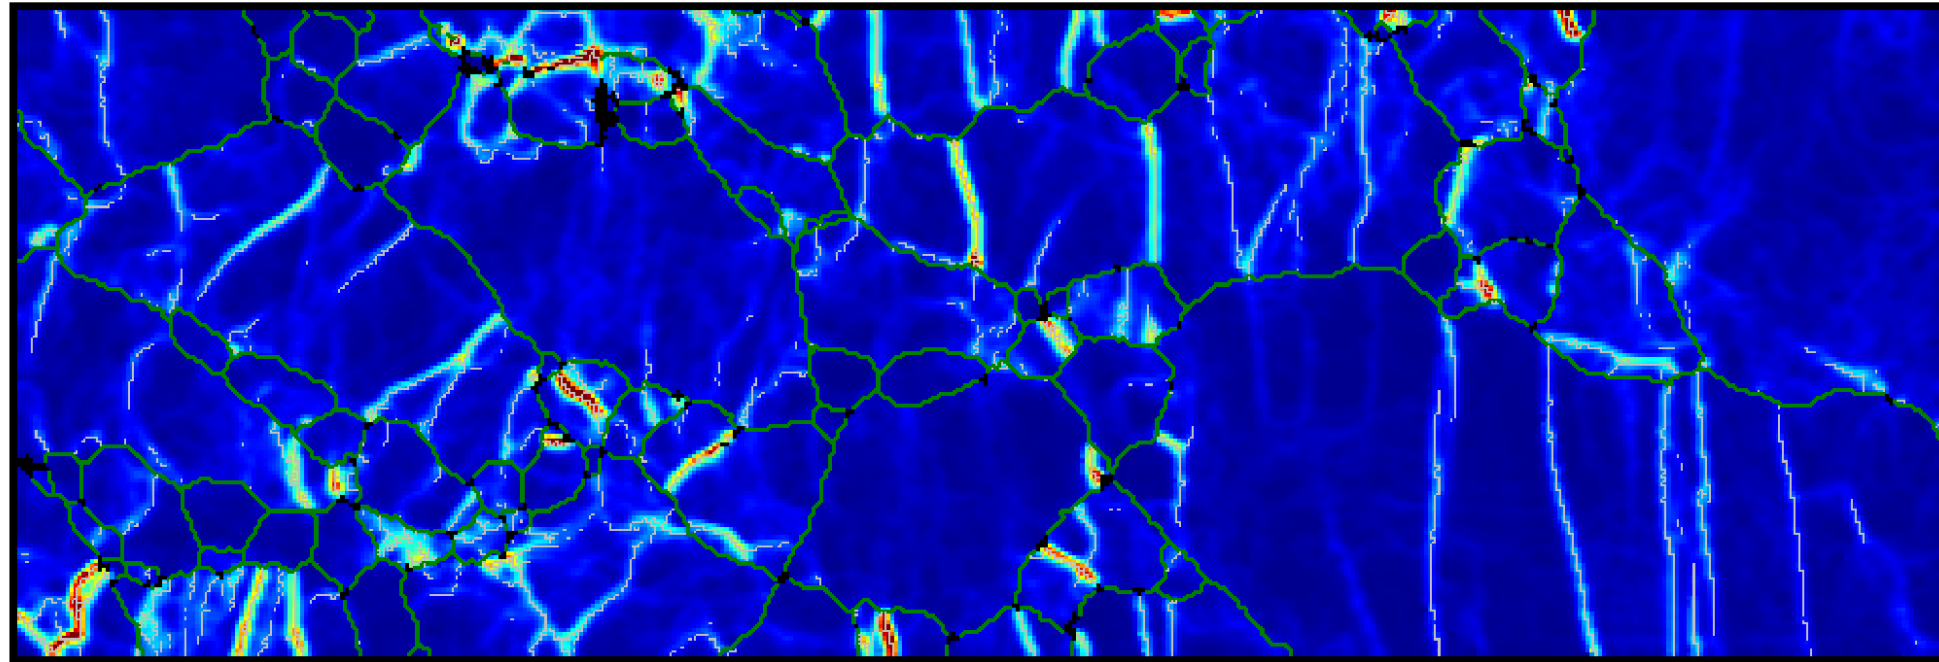

10  $\mu\text{m}$

Sylvie DEMOUCY - 20/1/2022  
CMT17\_2\_SI-crop\_small\_treated\_NUL\_FILTRE\_01

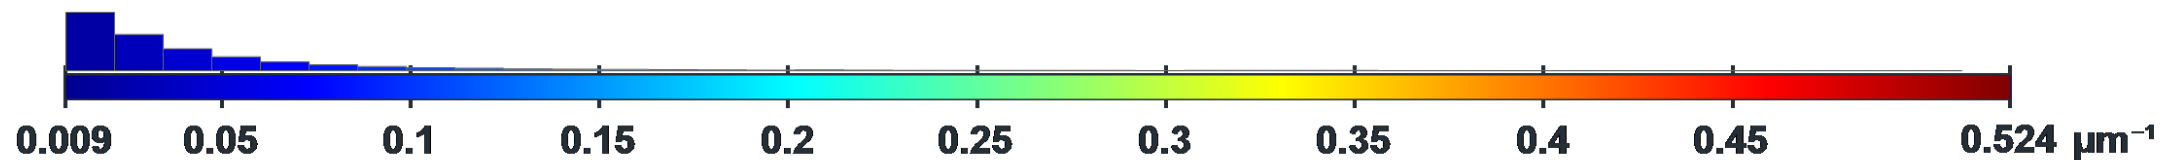

Step size: 0.1 $\mu\text{m}$  Resolution: 480x164 Index. Rate: 96% Magnification: x1500 Tension: 17kV

Minimum: 0 Maximum: 2.4 Average:  $5.3 \times 10^{-2}$  S. Dev:  $1.1 \times 10^{-1}$

# 13 component Of Disclination Tensor

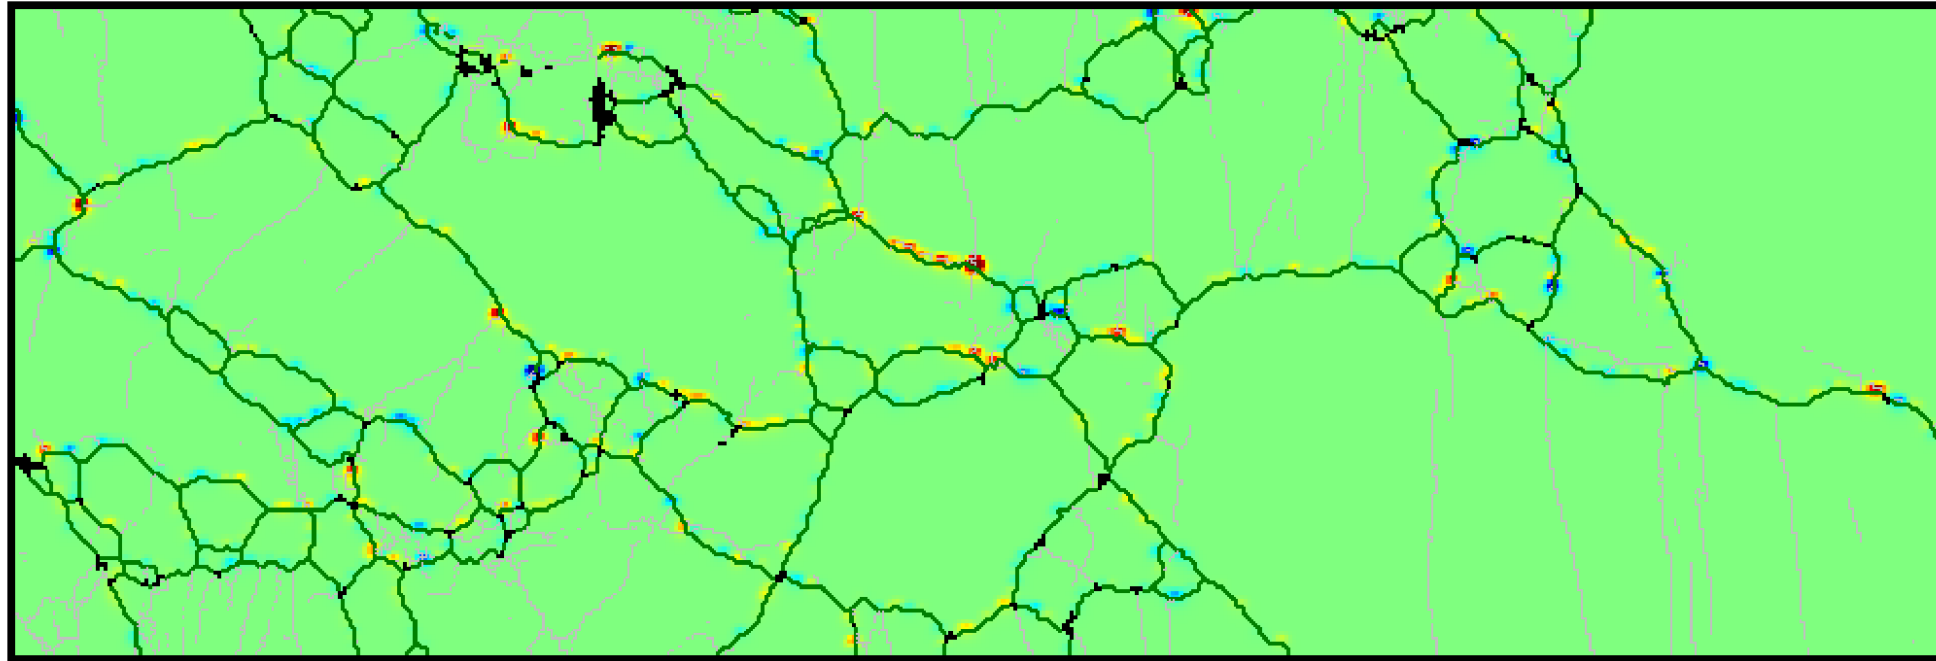

Sylvie DEMOUCY - 20/1/2022

CMT17\_2\_SI-crop\_small\_treated\_NUL\_FILTRE\_01

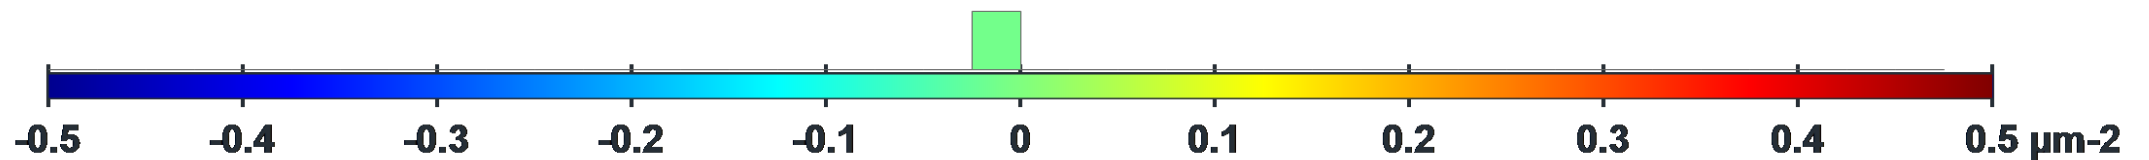

Step size: 0.1μm Resolution: 480x164 Index. Rate: 96% Magnification: x1500 Tension: 17kV

Minimum: -12.38 Maximum: 17.86 Average: 0 S. Dev: 0.14

## 23 component Of Disclination Tensor

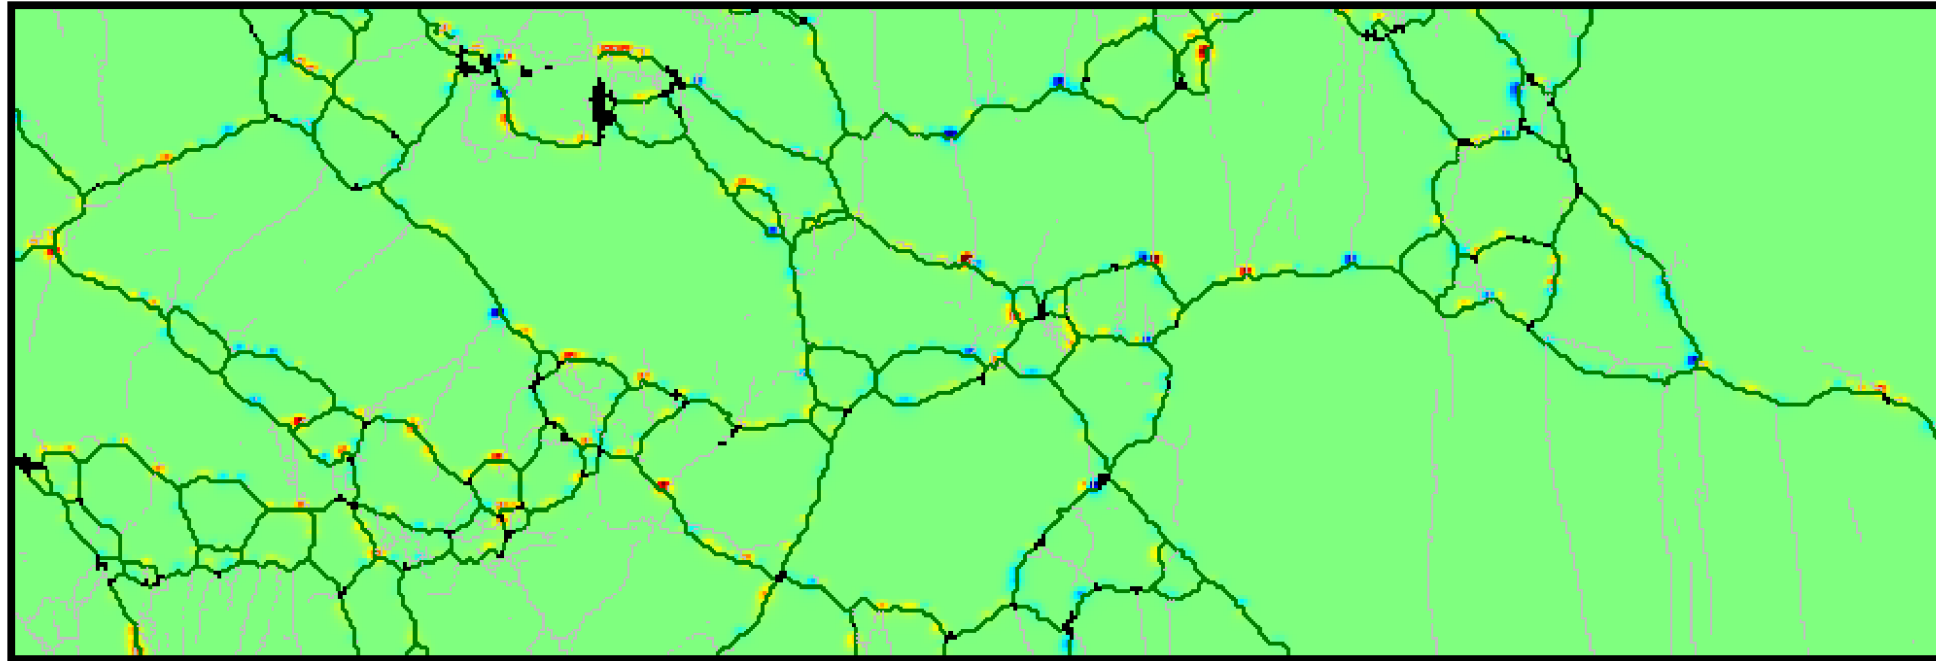

10  $\mu\text{m}$

Sylvie DEMOUCY - 20/1/2022  
CMT17\_2\_SI-crop\_small\_treated\_NUL\_FILTRE\_01

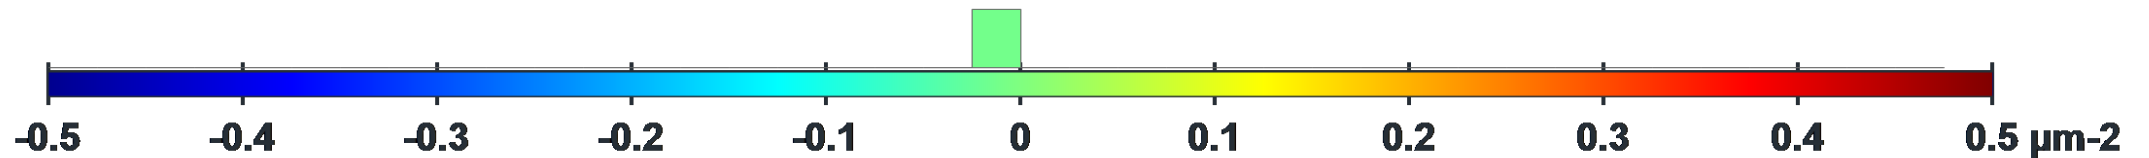

Step size: 0.1  $\mu\text{m}$  Resolution: 480x164 Index. Rate: 96% Magnification: x1500 Tension: 17kV

Minimum: -7.83 Maximum: 10.56 Average: 0 S. Dev: 0.14

## 33 component Of Disclination Tensor

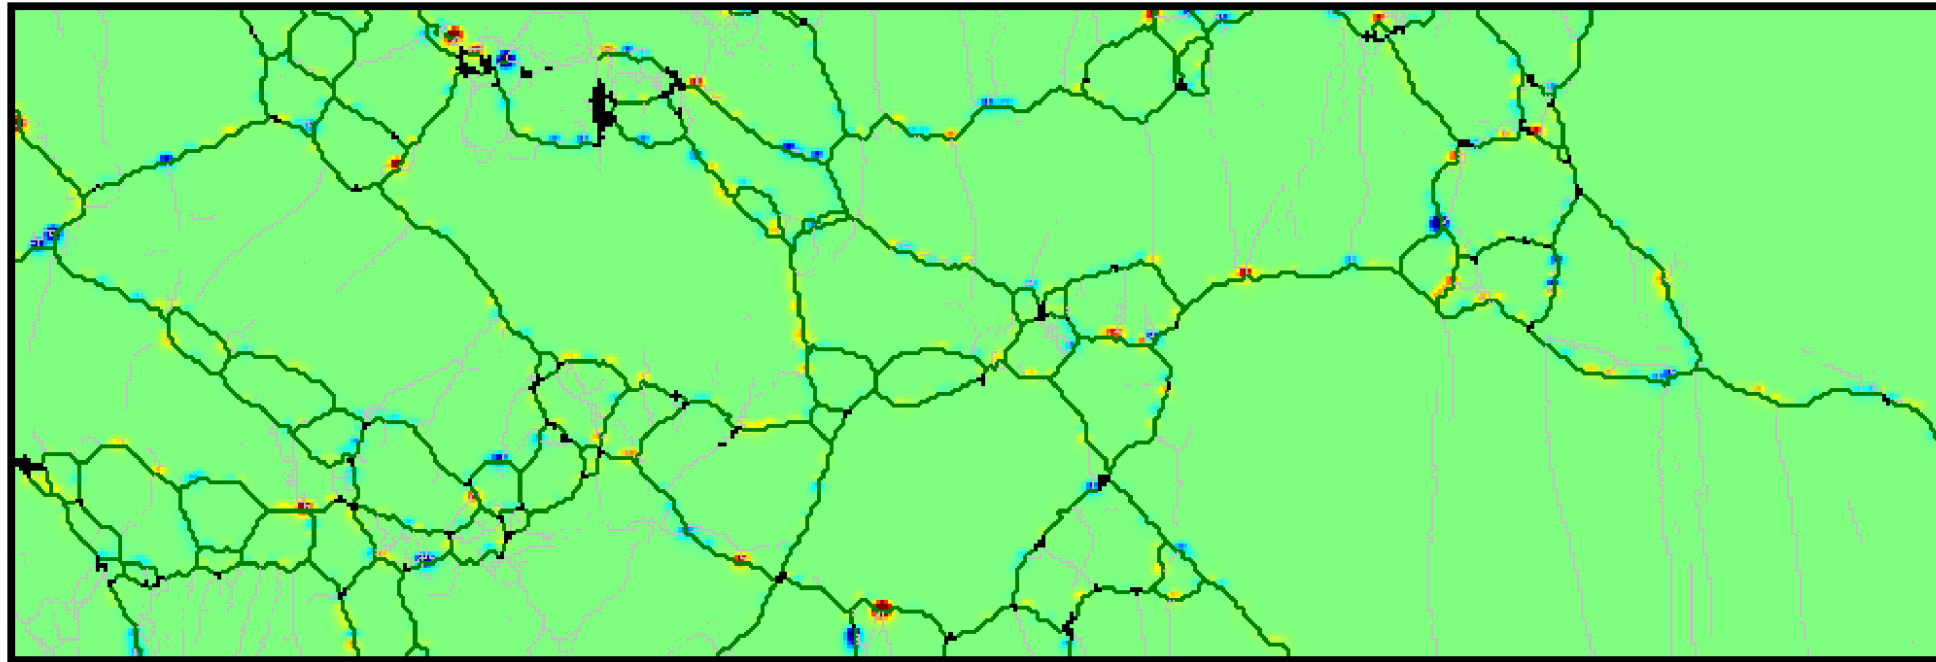

Sylvie DEMOUCY - 20/1/2022

CMT17\_2\_SI-crop\_small\_treated\_NUL\_FILTRE\_01

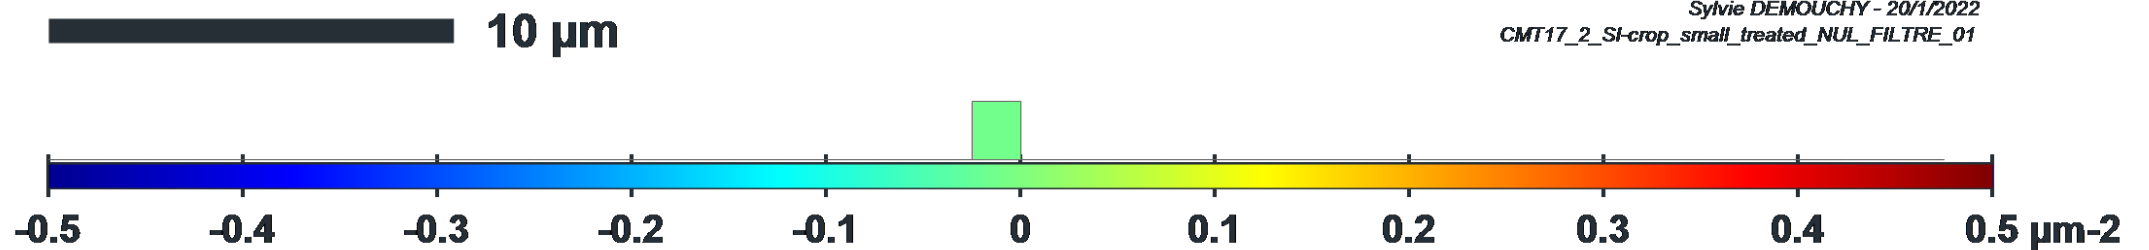

Step size: 0.1μm Resolution: 480x164 Index. Rate: 96% Magnification: x1500 Tension: 17kV

Minimum: -14.46 Maximum: 15.07 Average: 0 S. Dev: 0.16

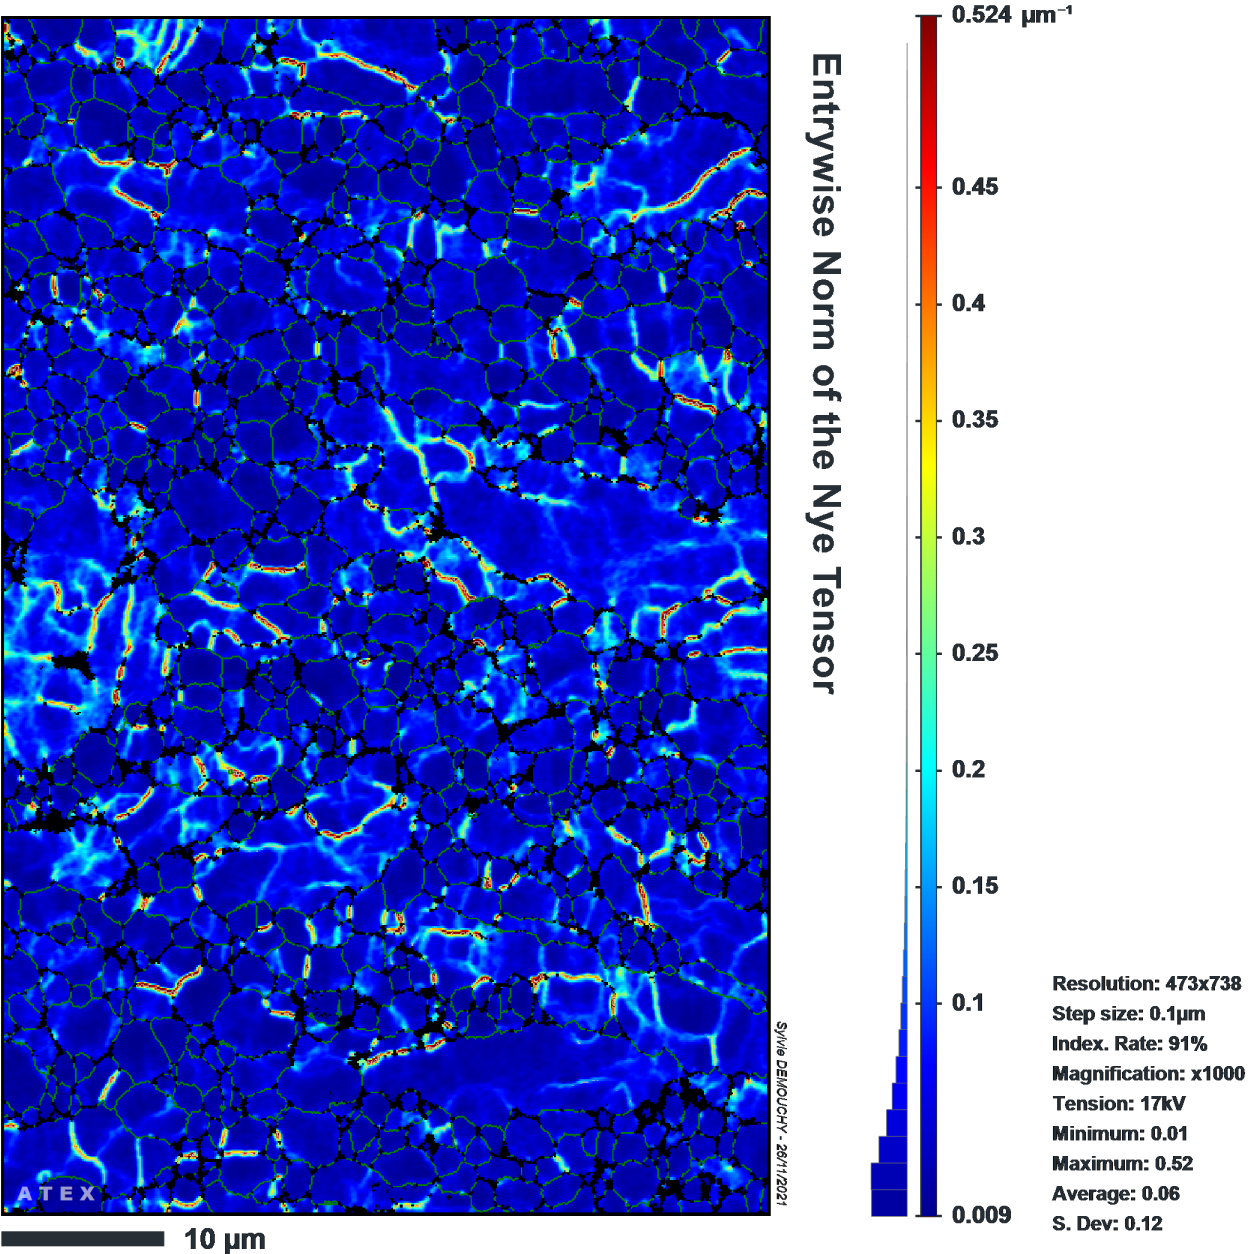

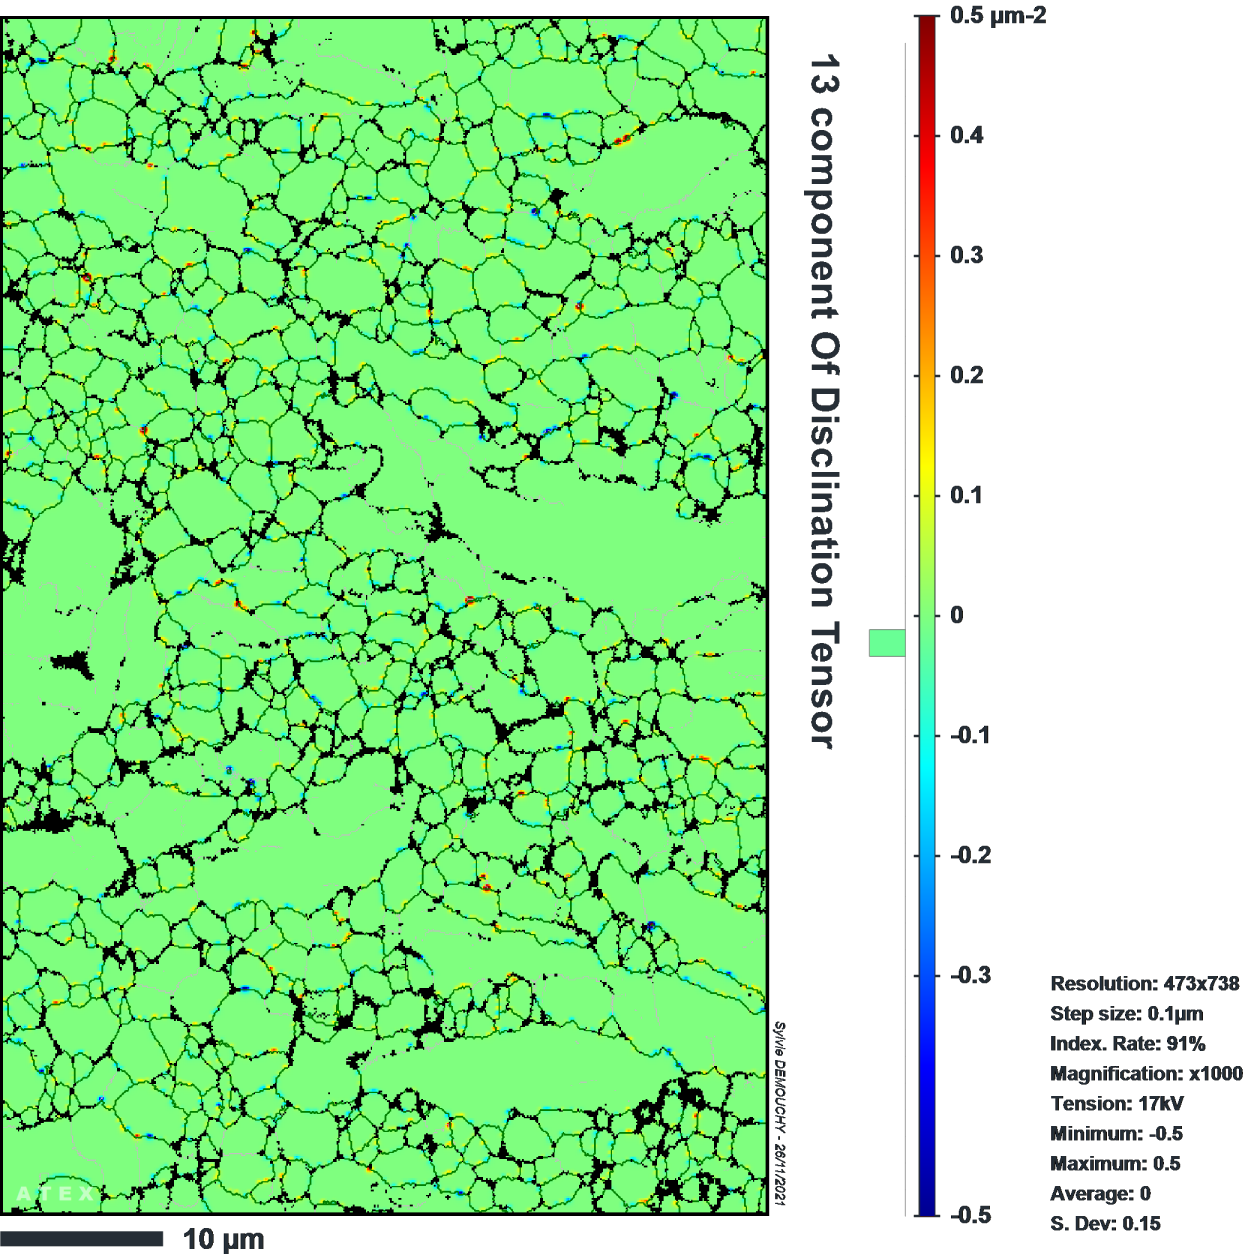

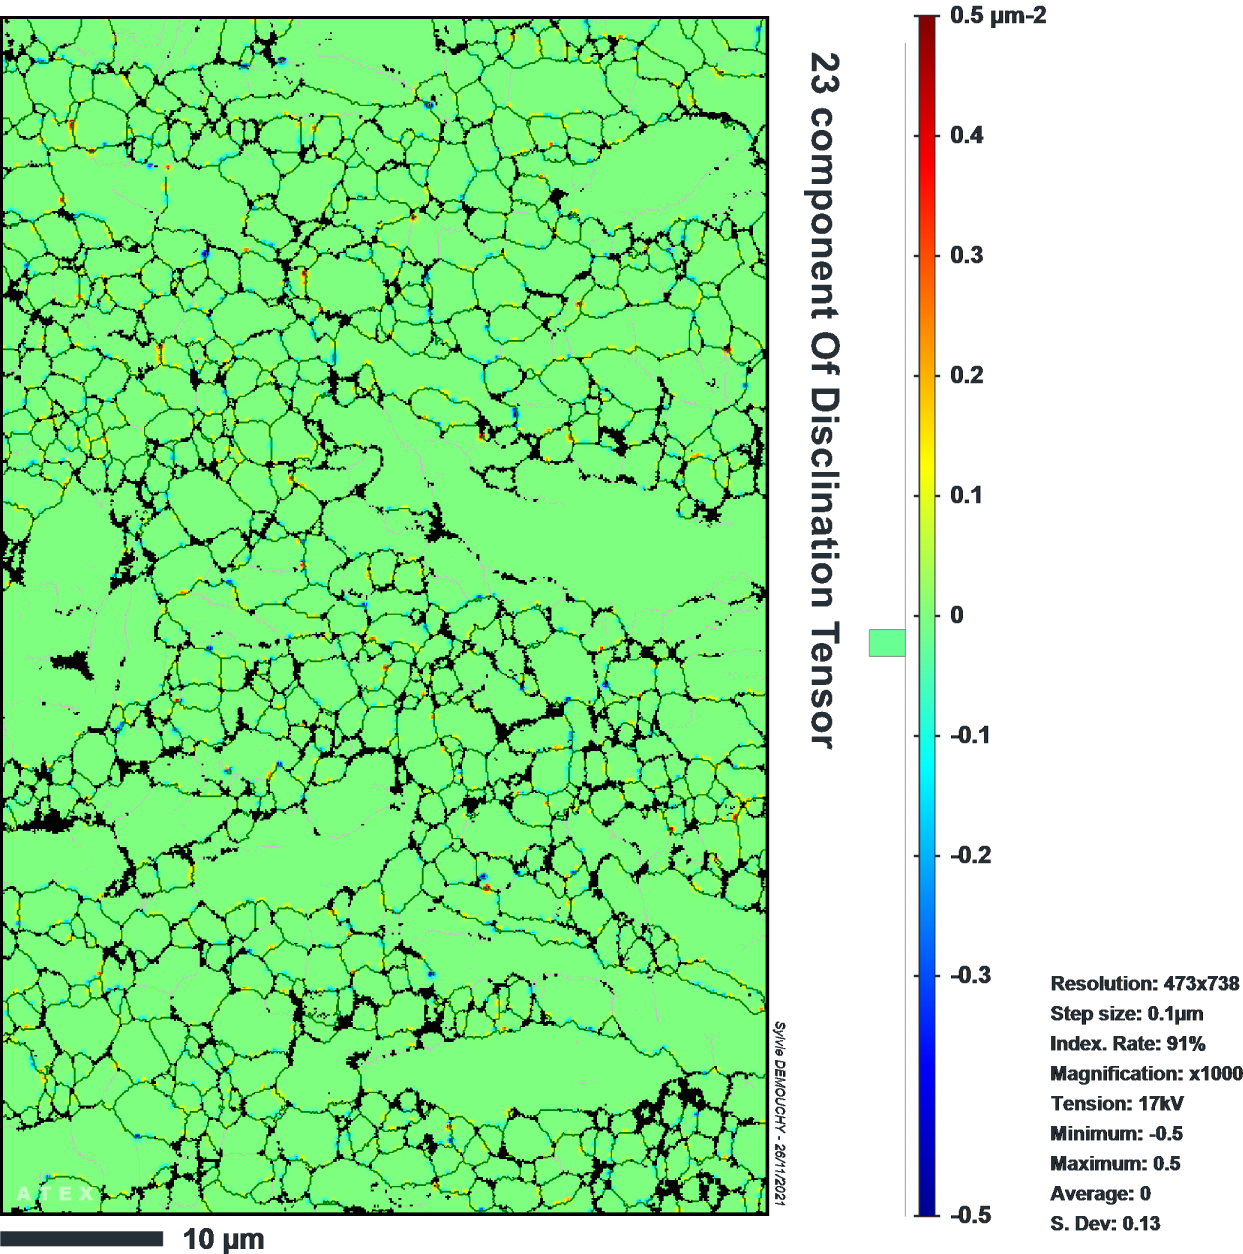

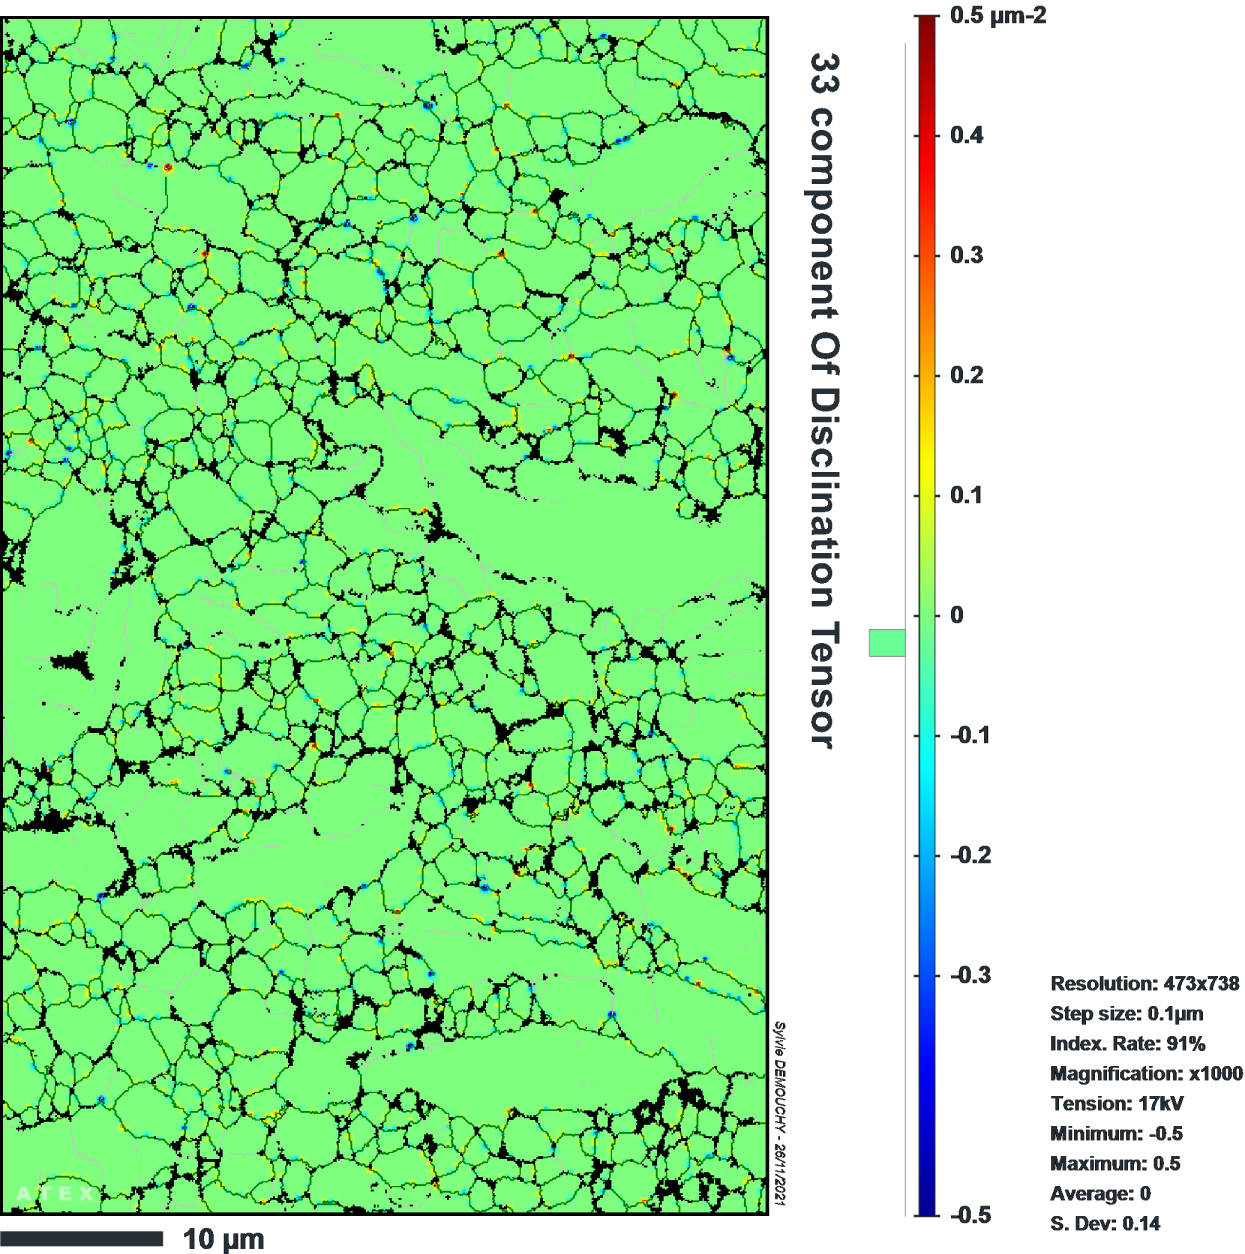

Entrywise Norm of the Nye Tensor

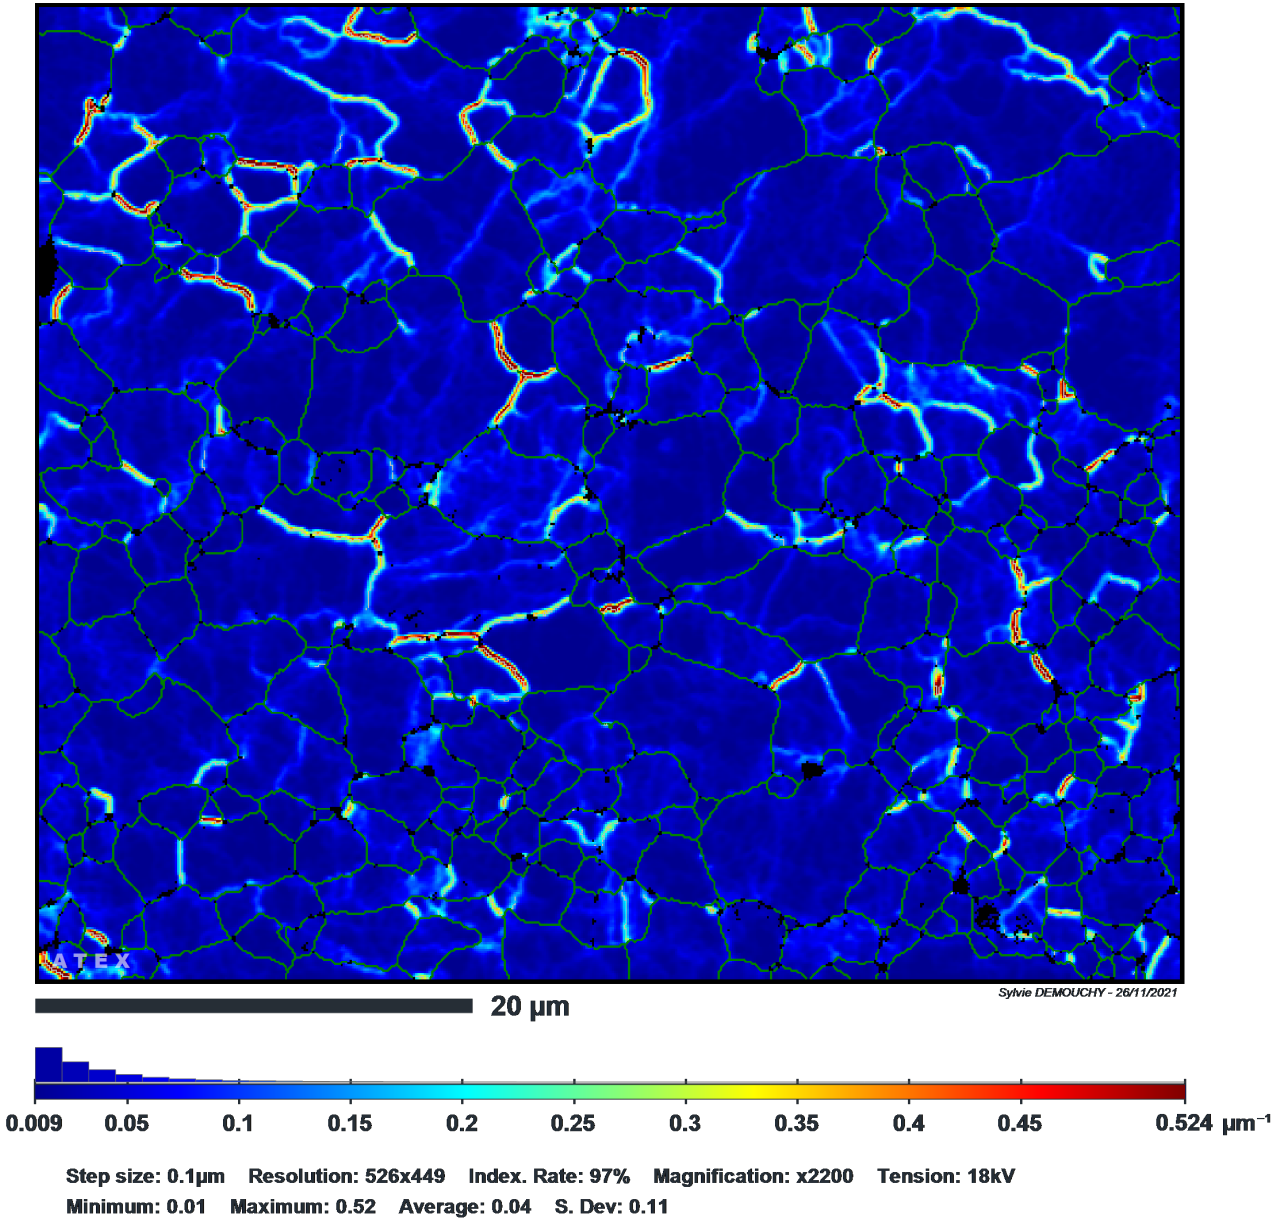

13 component Of Disclination Tensor

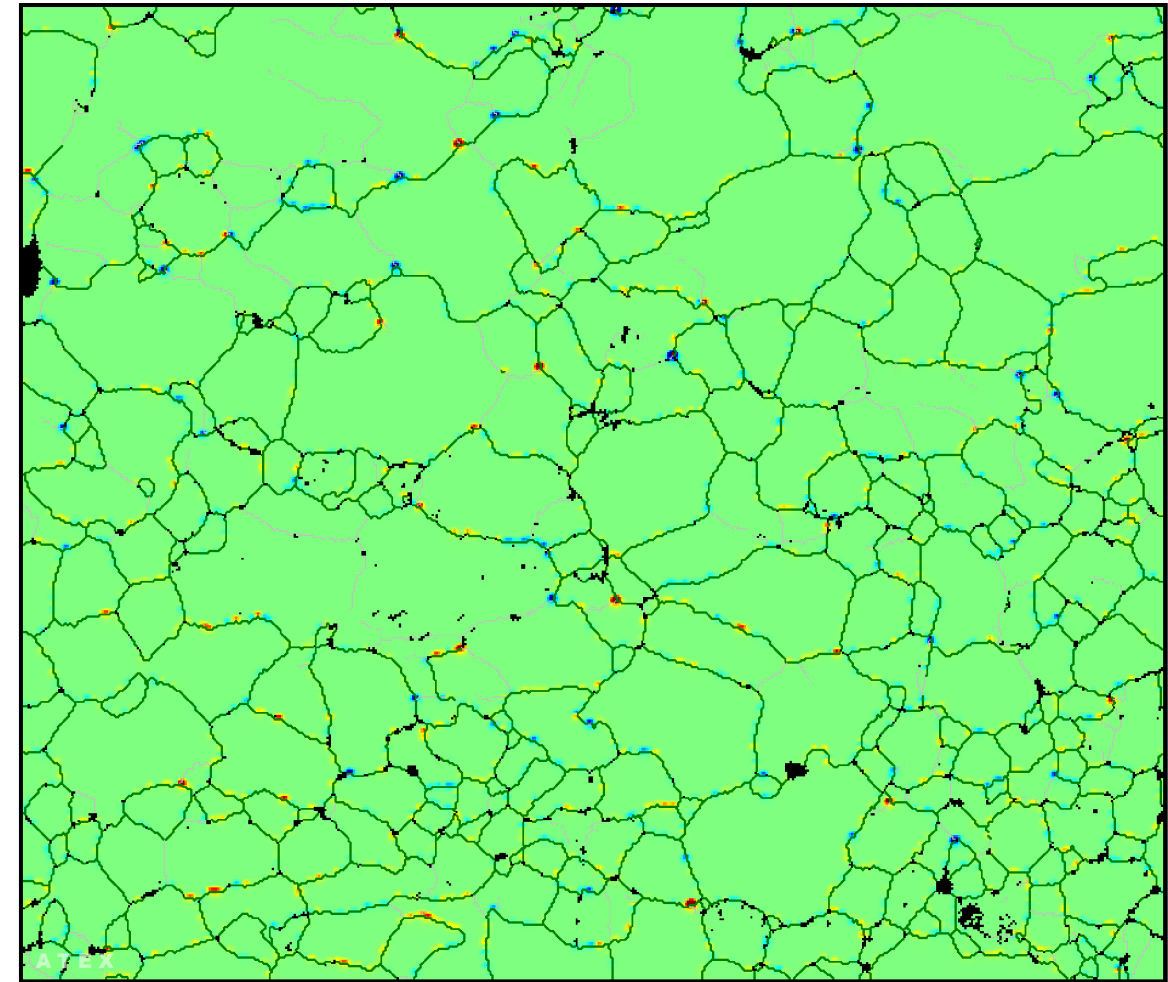

Sylvie DEMOUCY - 26/11/2021

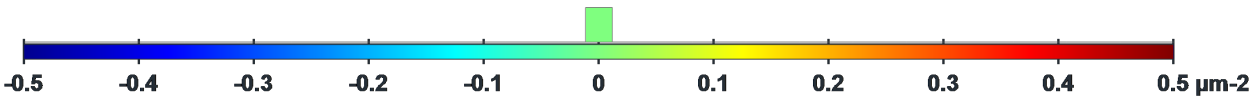

Step size: 0.1μm Resolution: 526x449 Index. Rate: 97% Magnification: x2200 Tension: 18kV  
Minimum: -0.5 Maximum: 0.5 Average: 0 S. Dev: 0.15

23 component Of Disclination Tensor

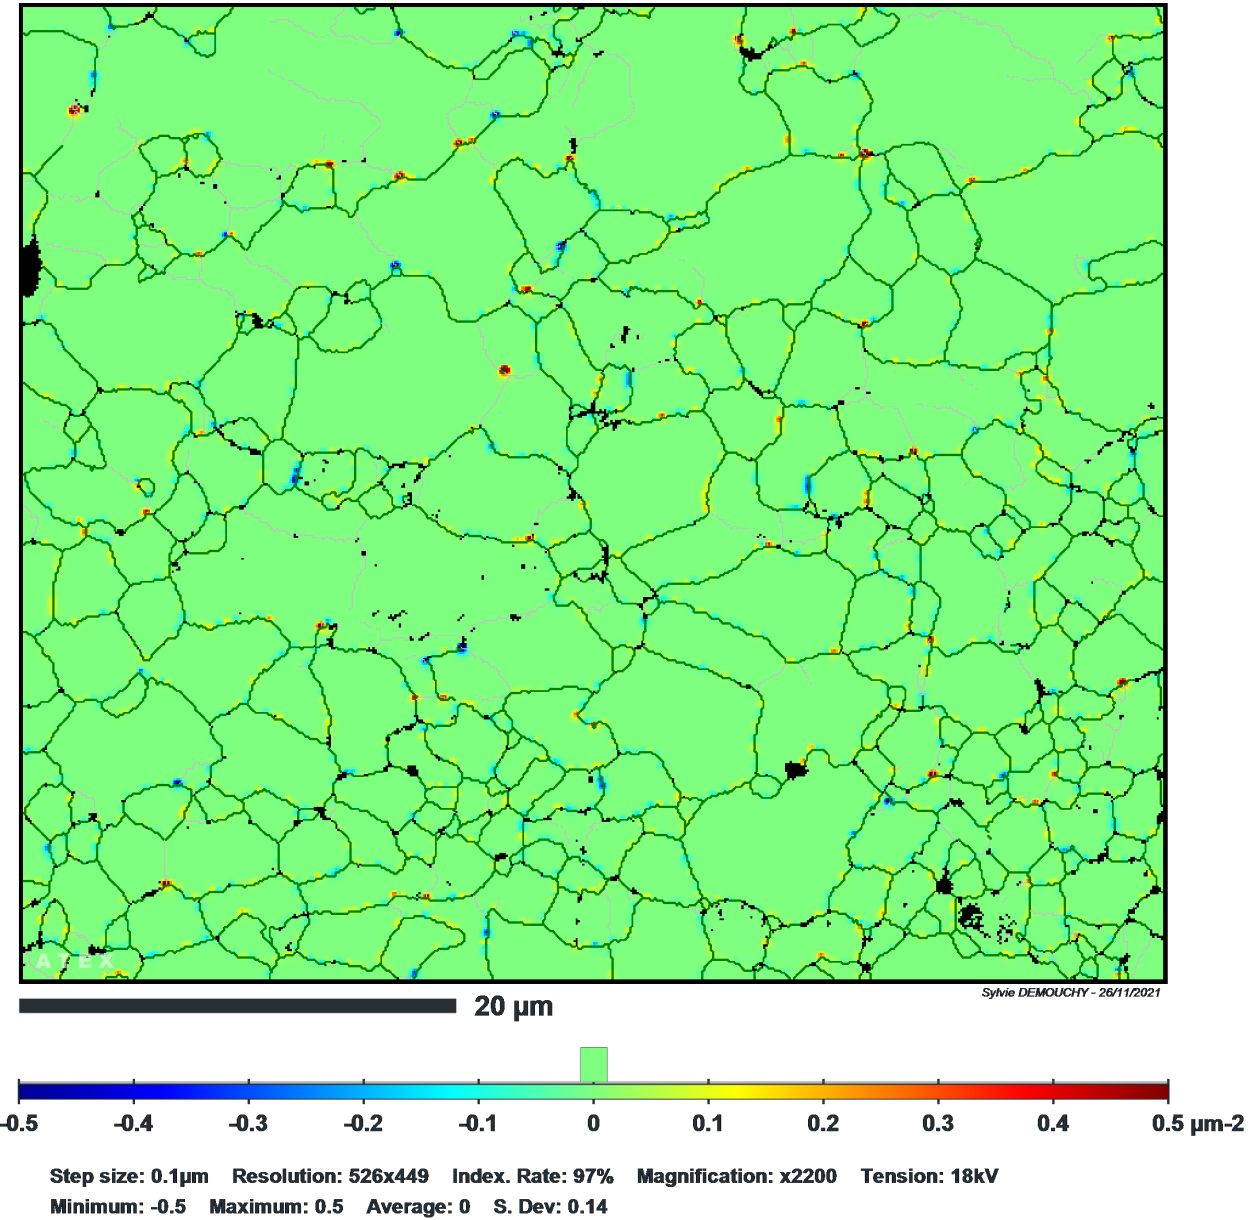

33 component Of Disclination Tensor

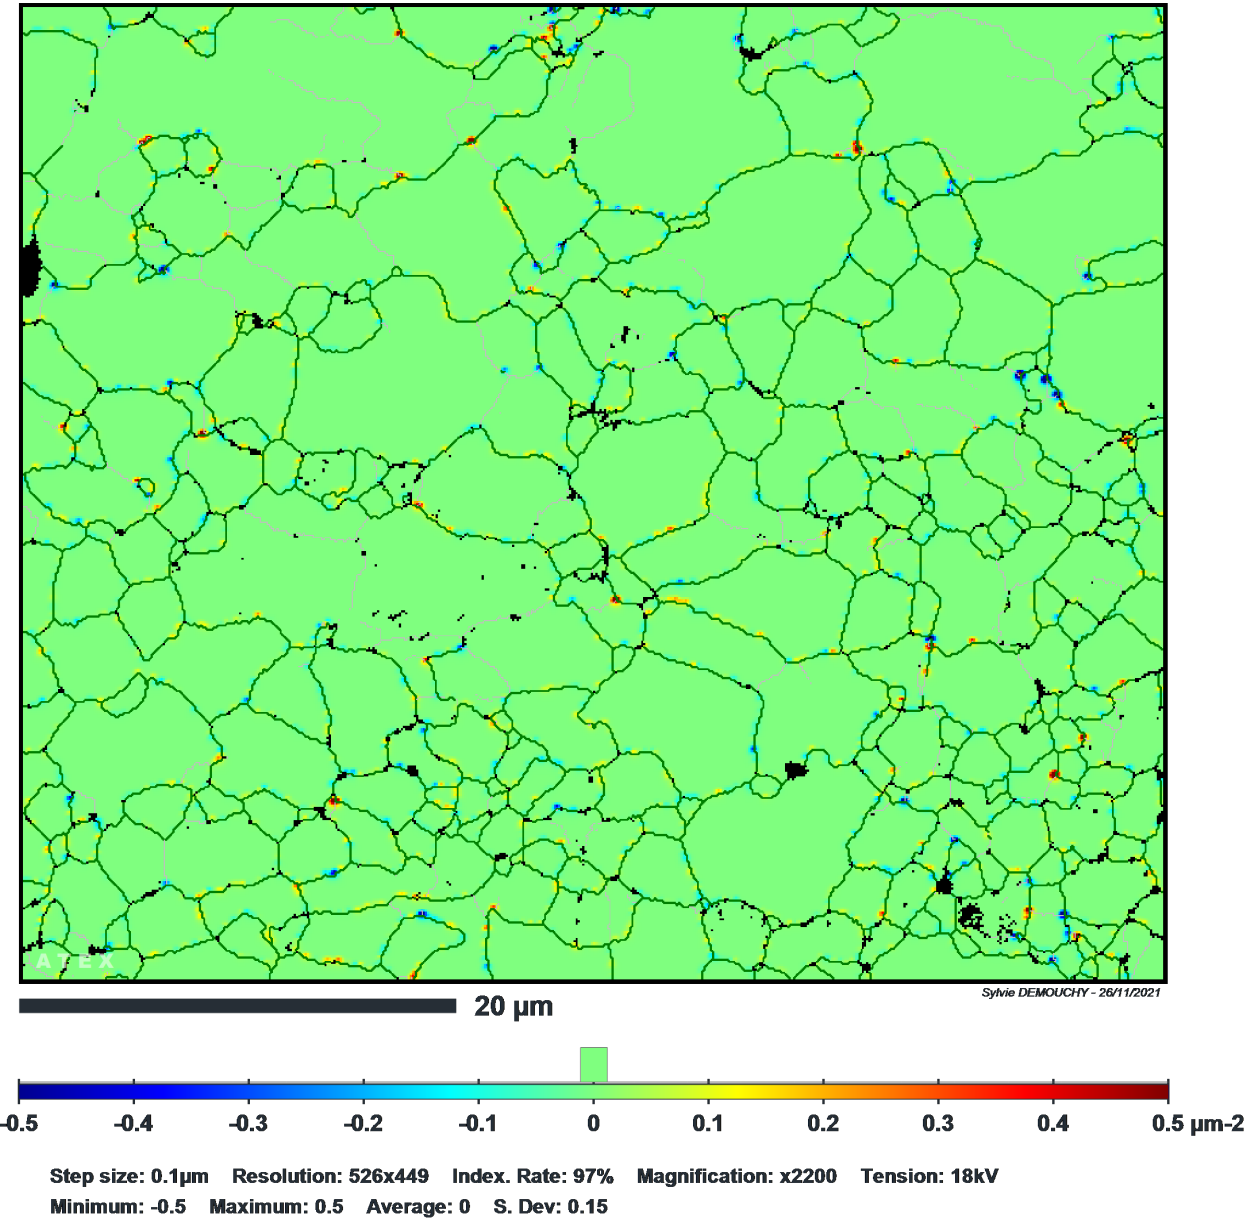

Entrywise Norm of the Nye Tensor

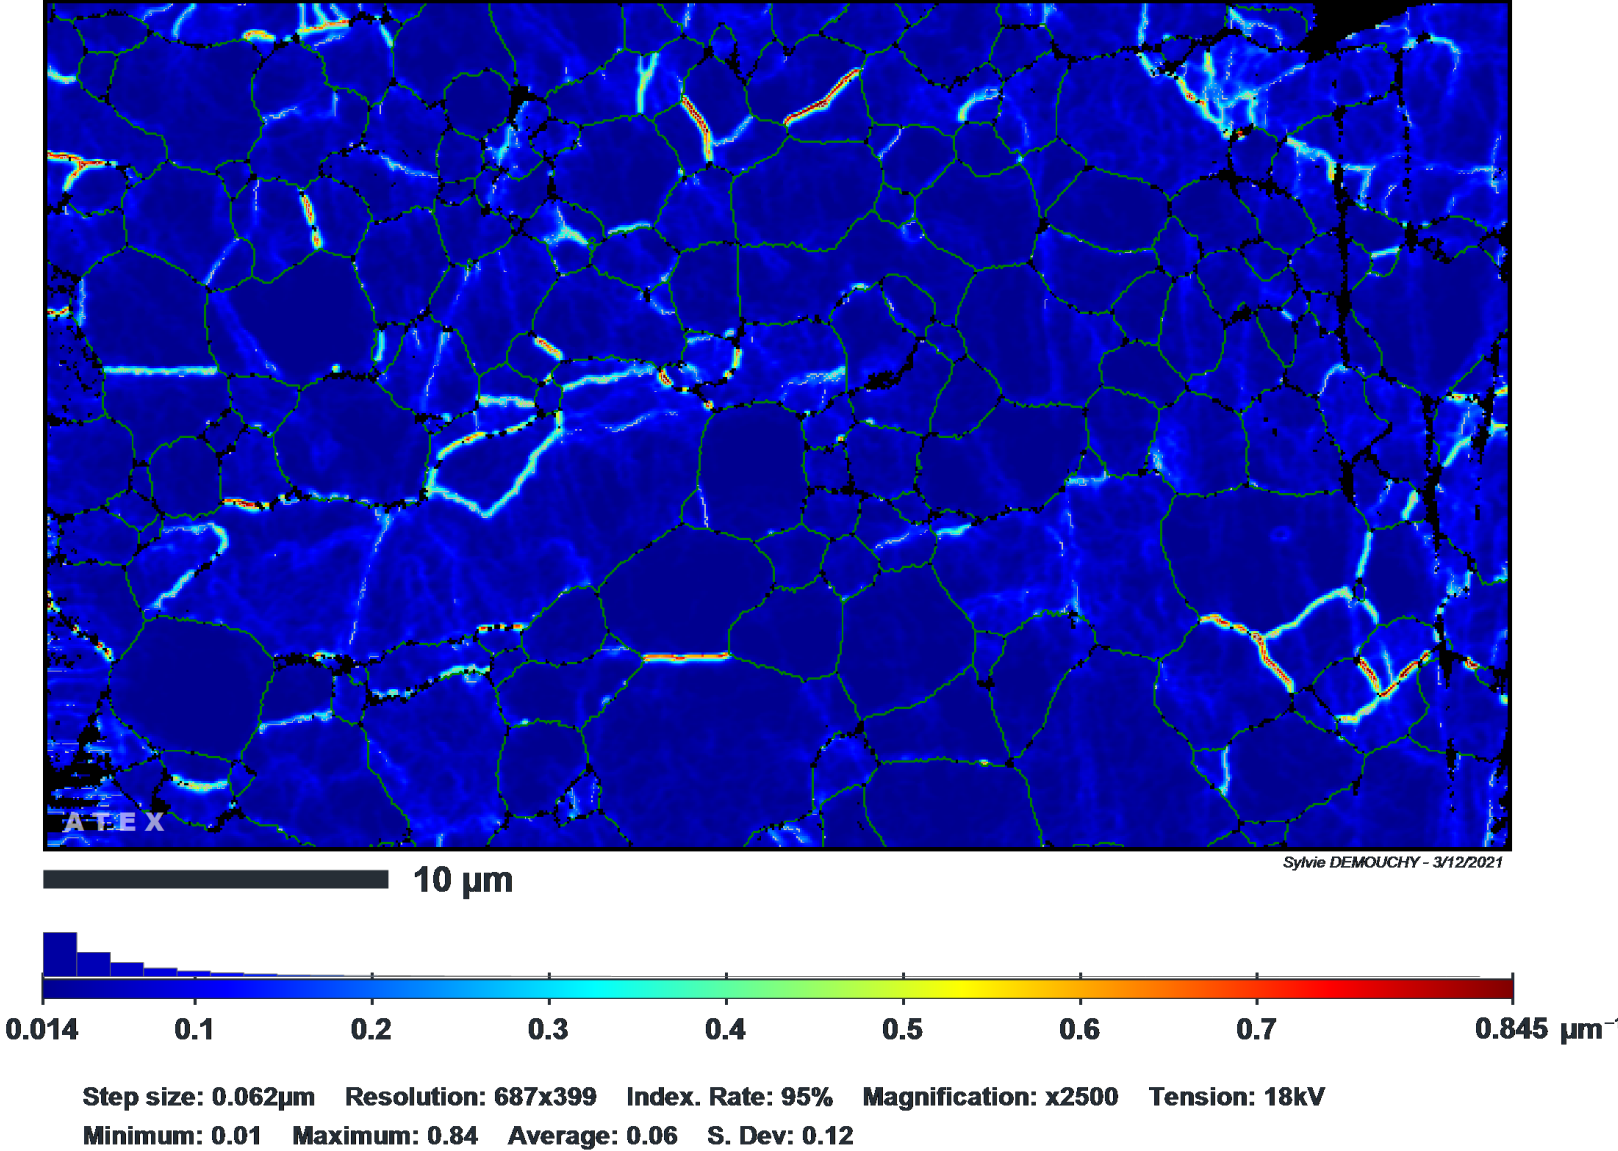

# 13 component Of Disclination Tensor

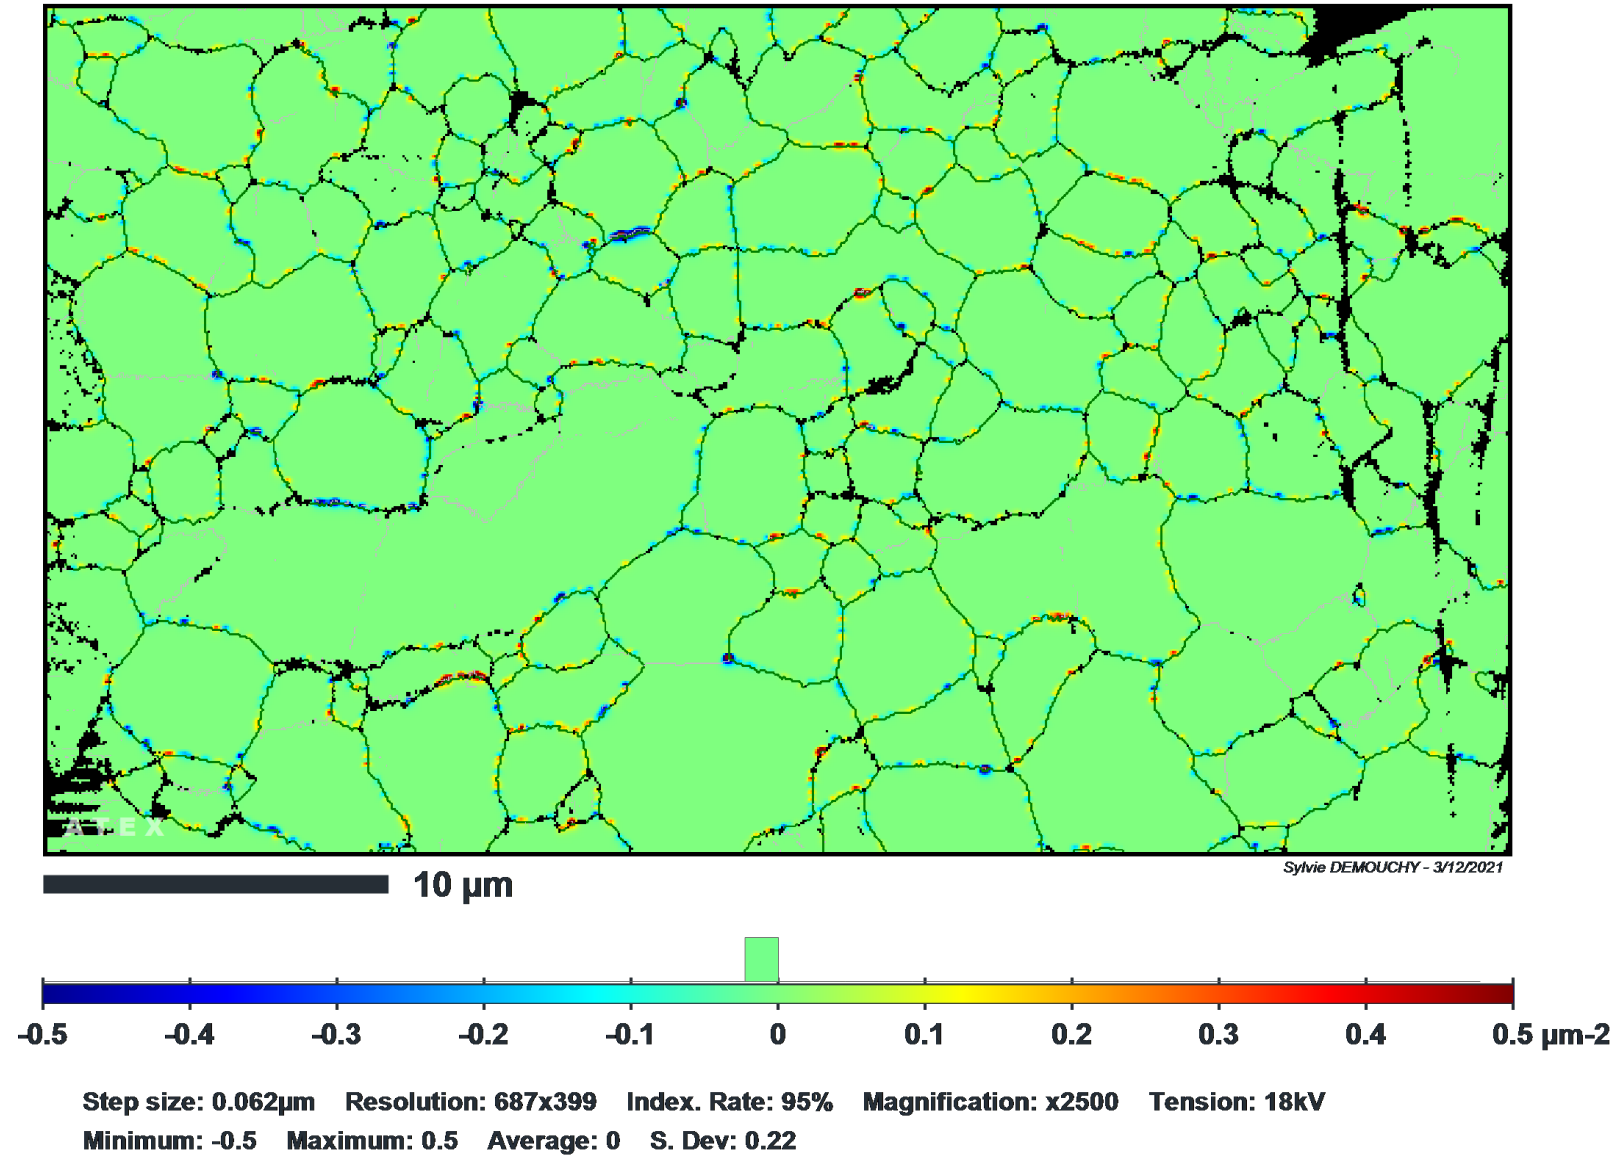

## 23 component Of Disclination Tensor

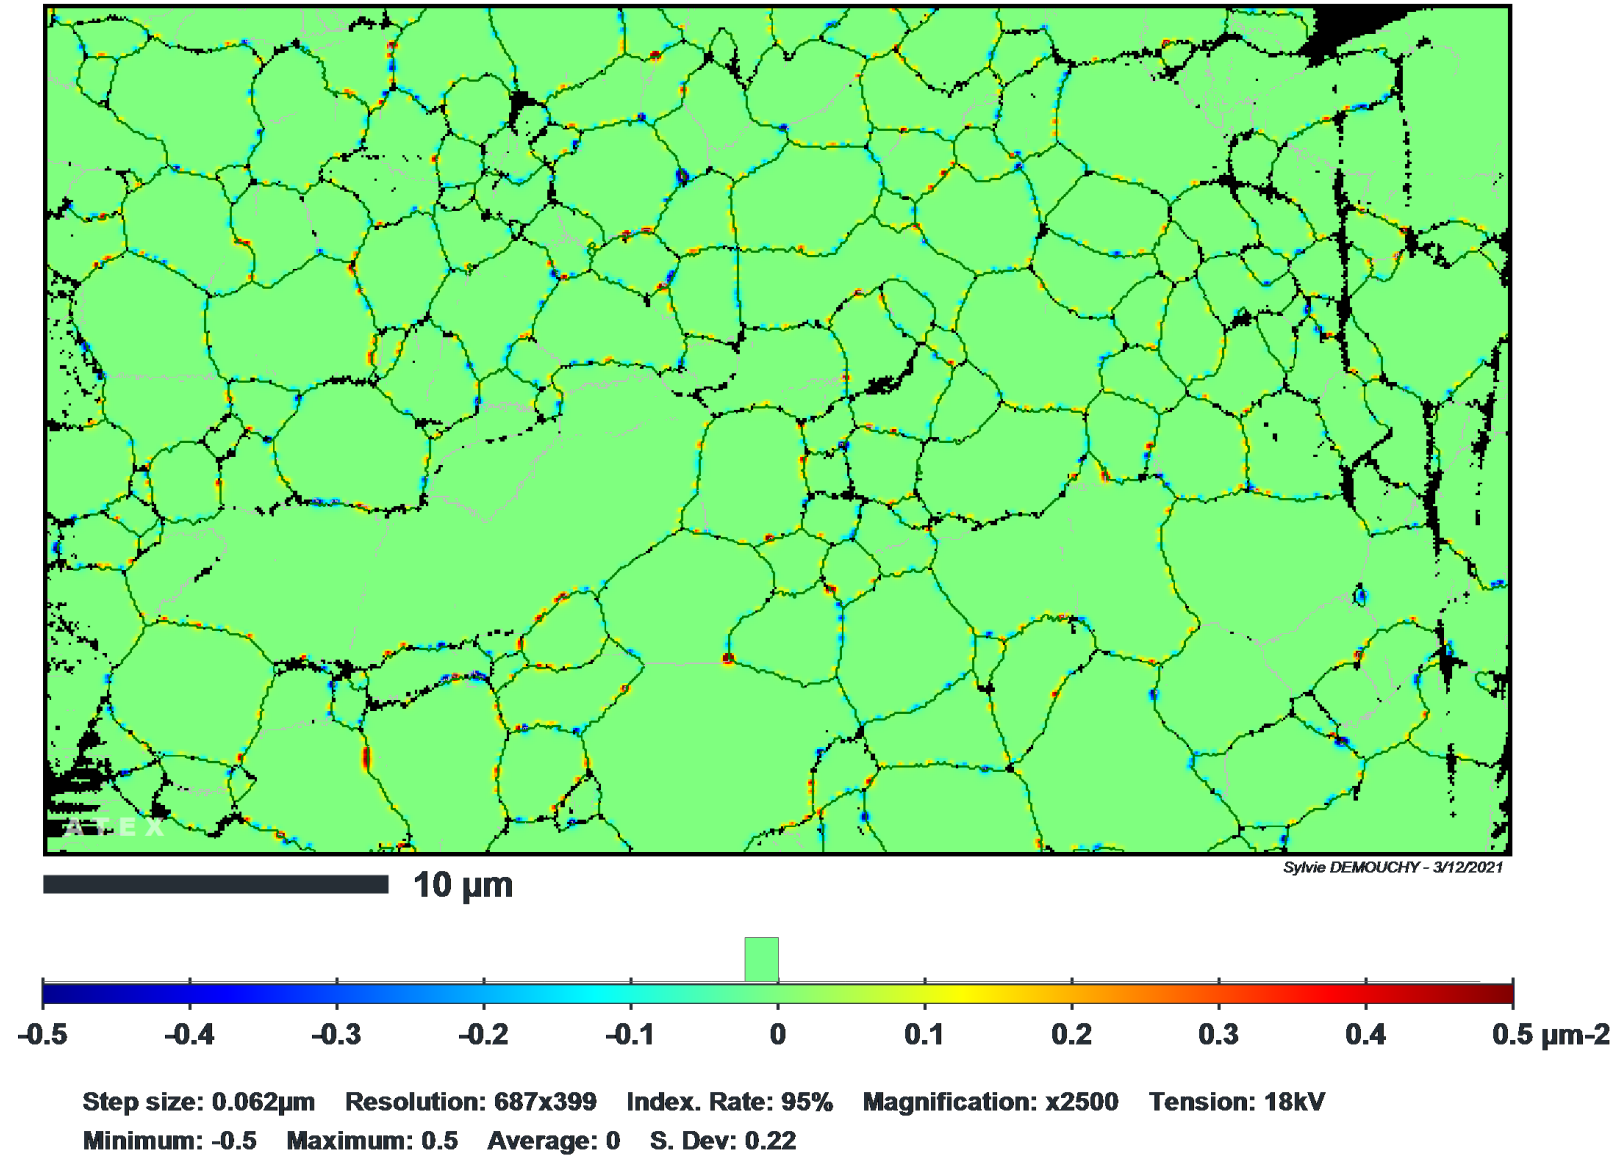

### 33 component Of Disclination Tensor

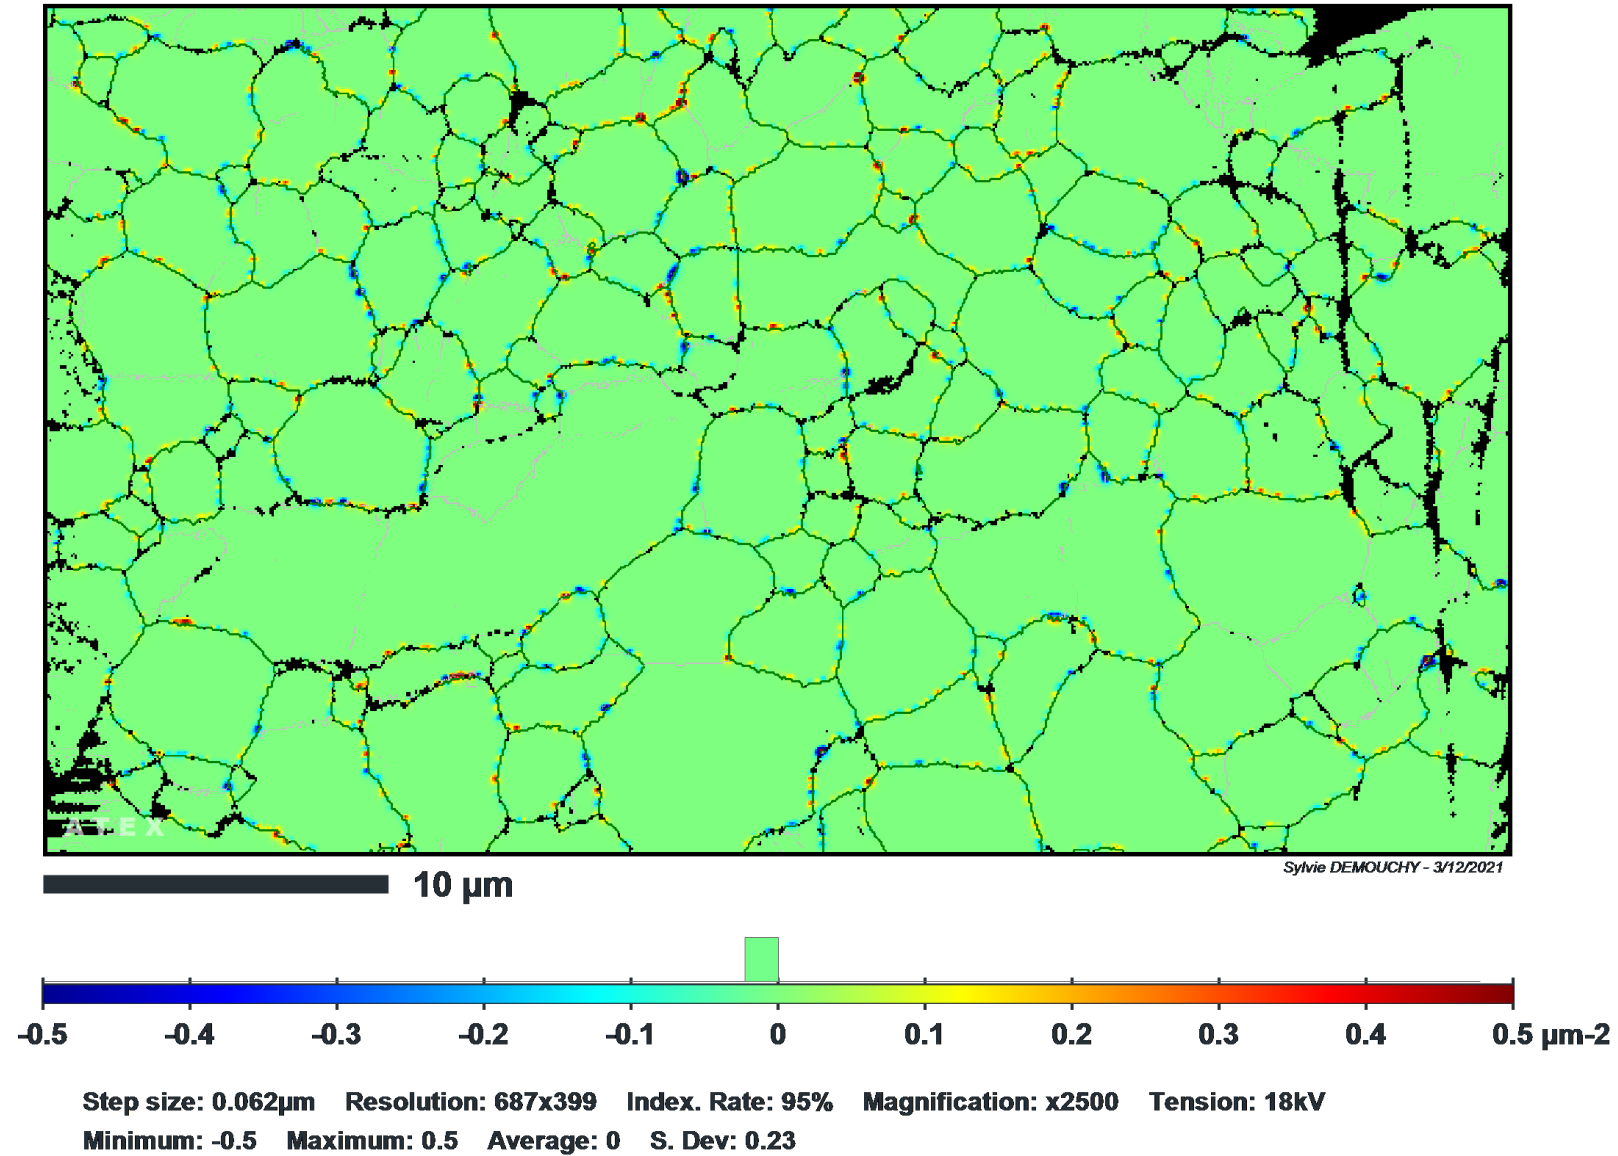

Entrywise Norm of the Nye Tensor

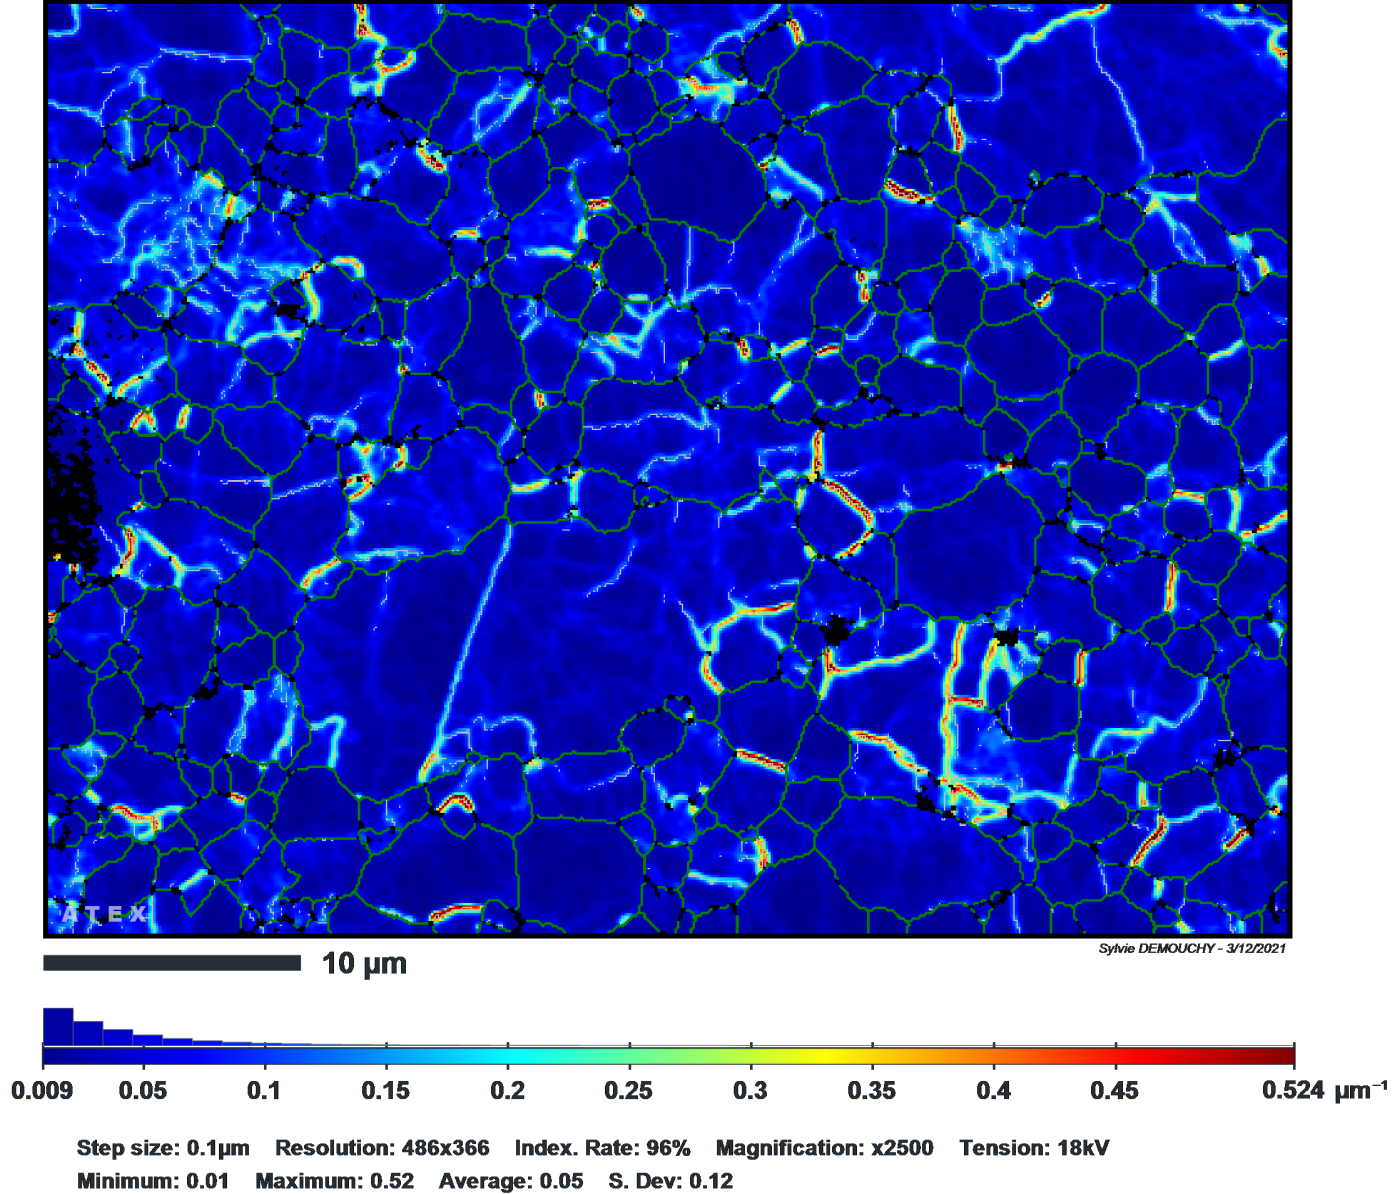

13 component Of Disclination Tensor

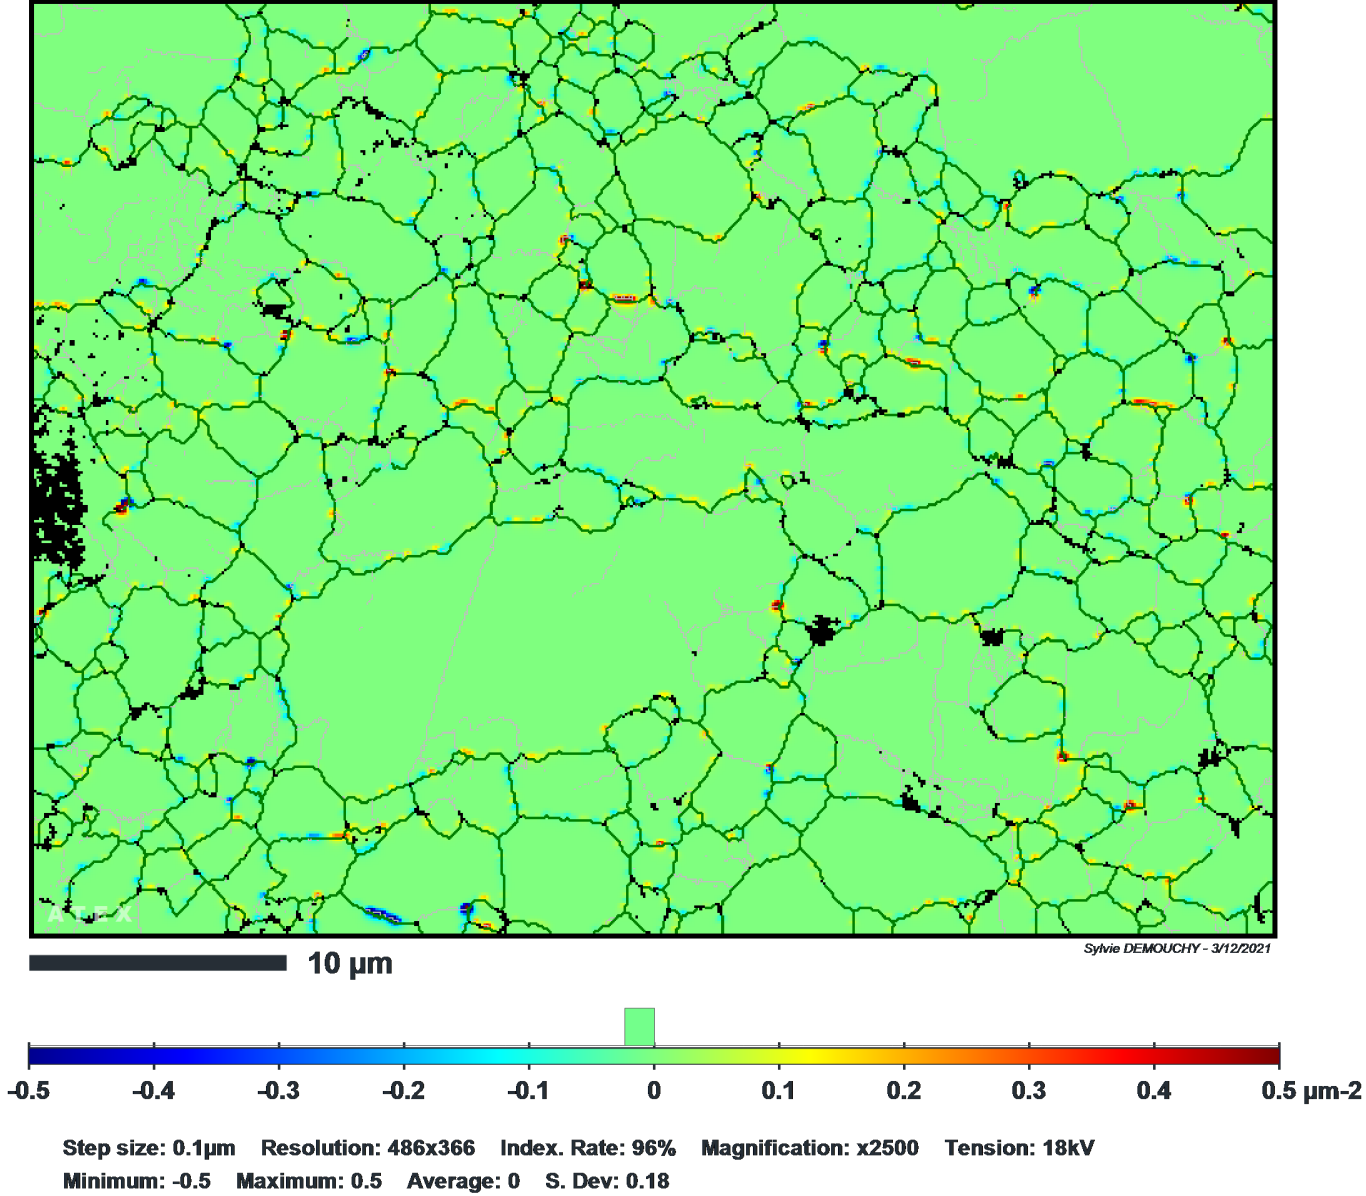

23 component Of Disclination Tensor

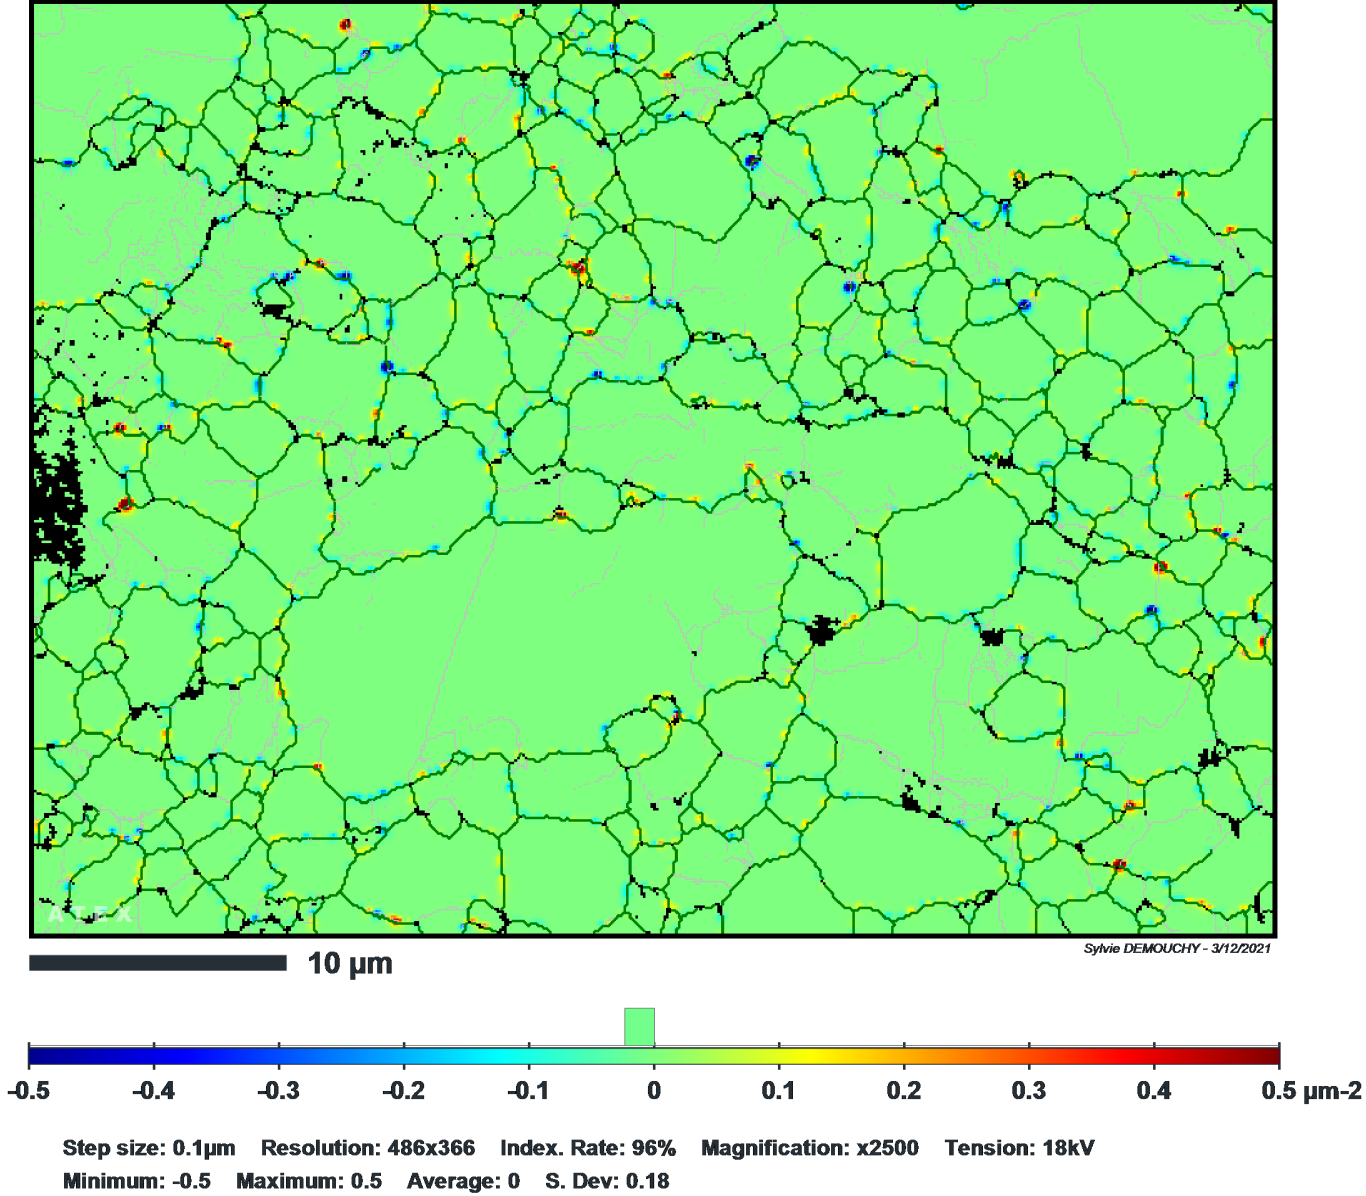

33 component Of Disclination Tensor

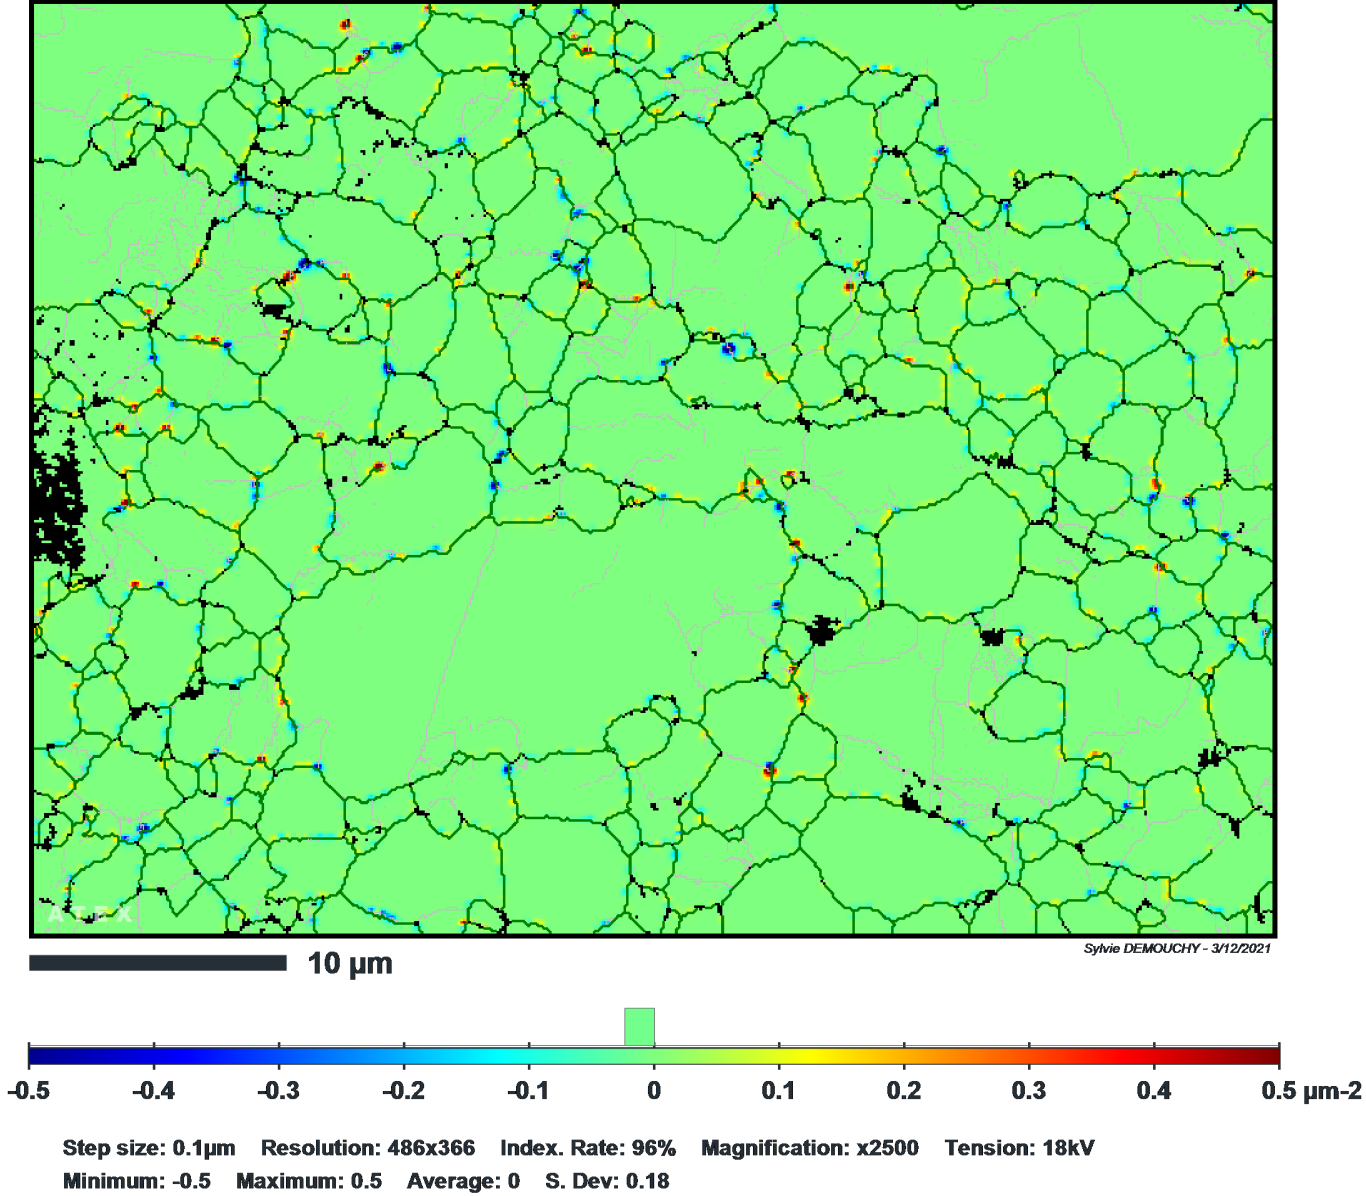

Entrywise Norm of the Nye Tensor

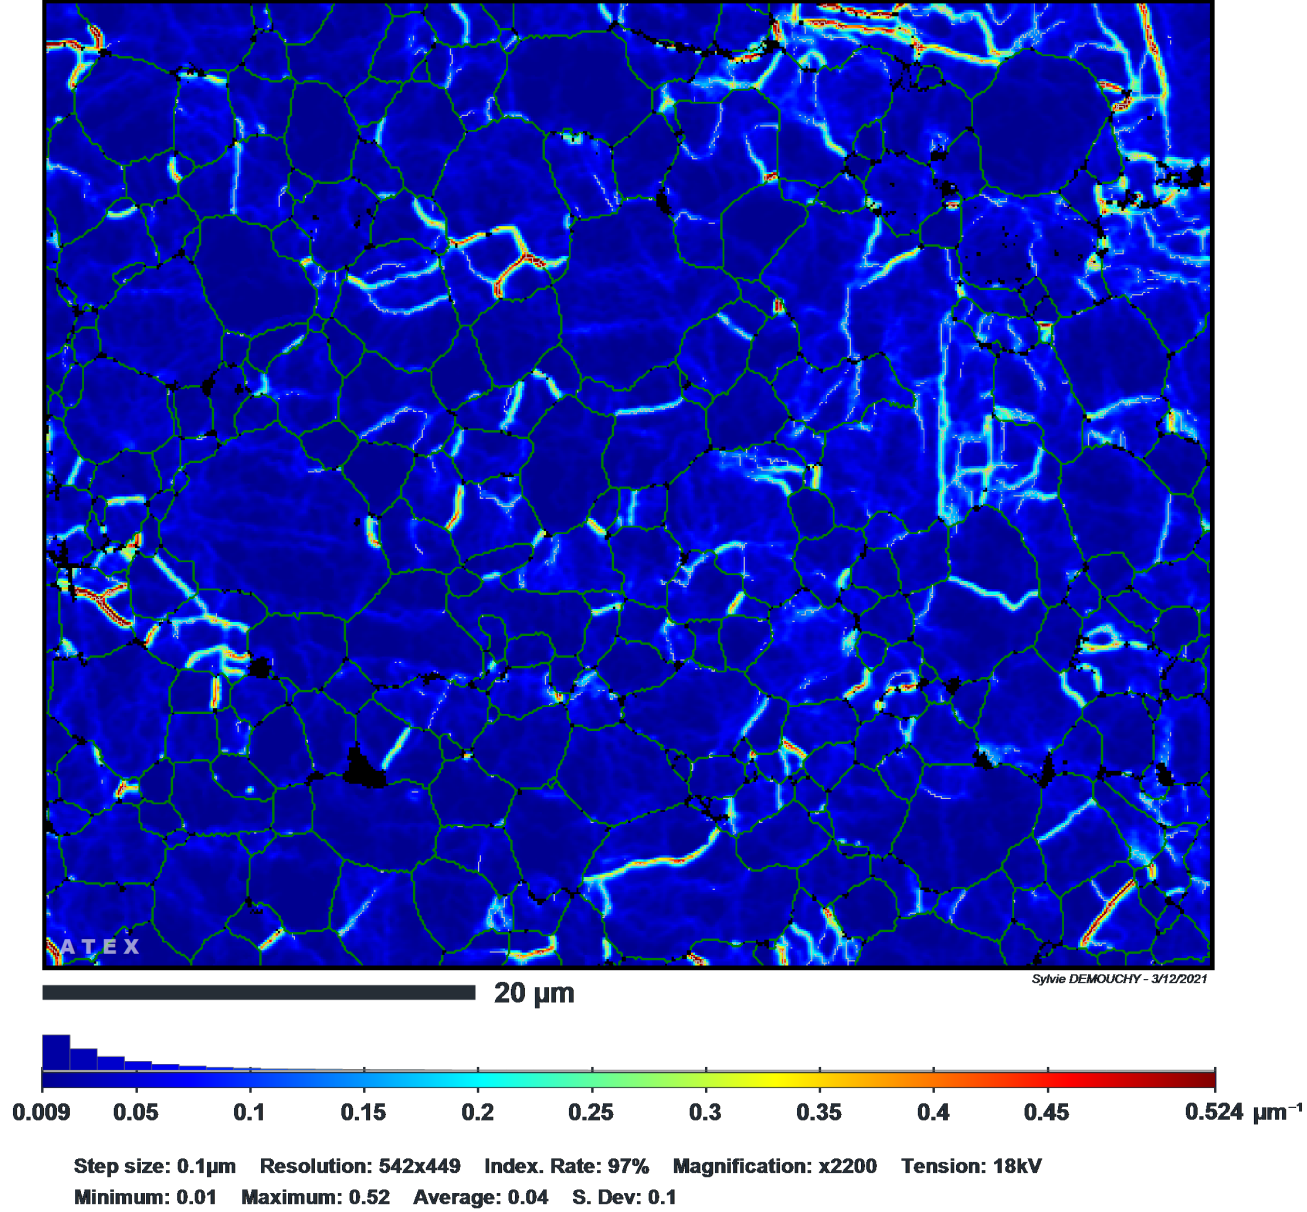

13 component Of Disclination Tensor

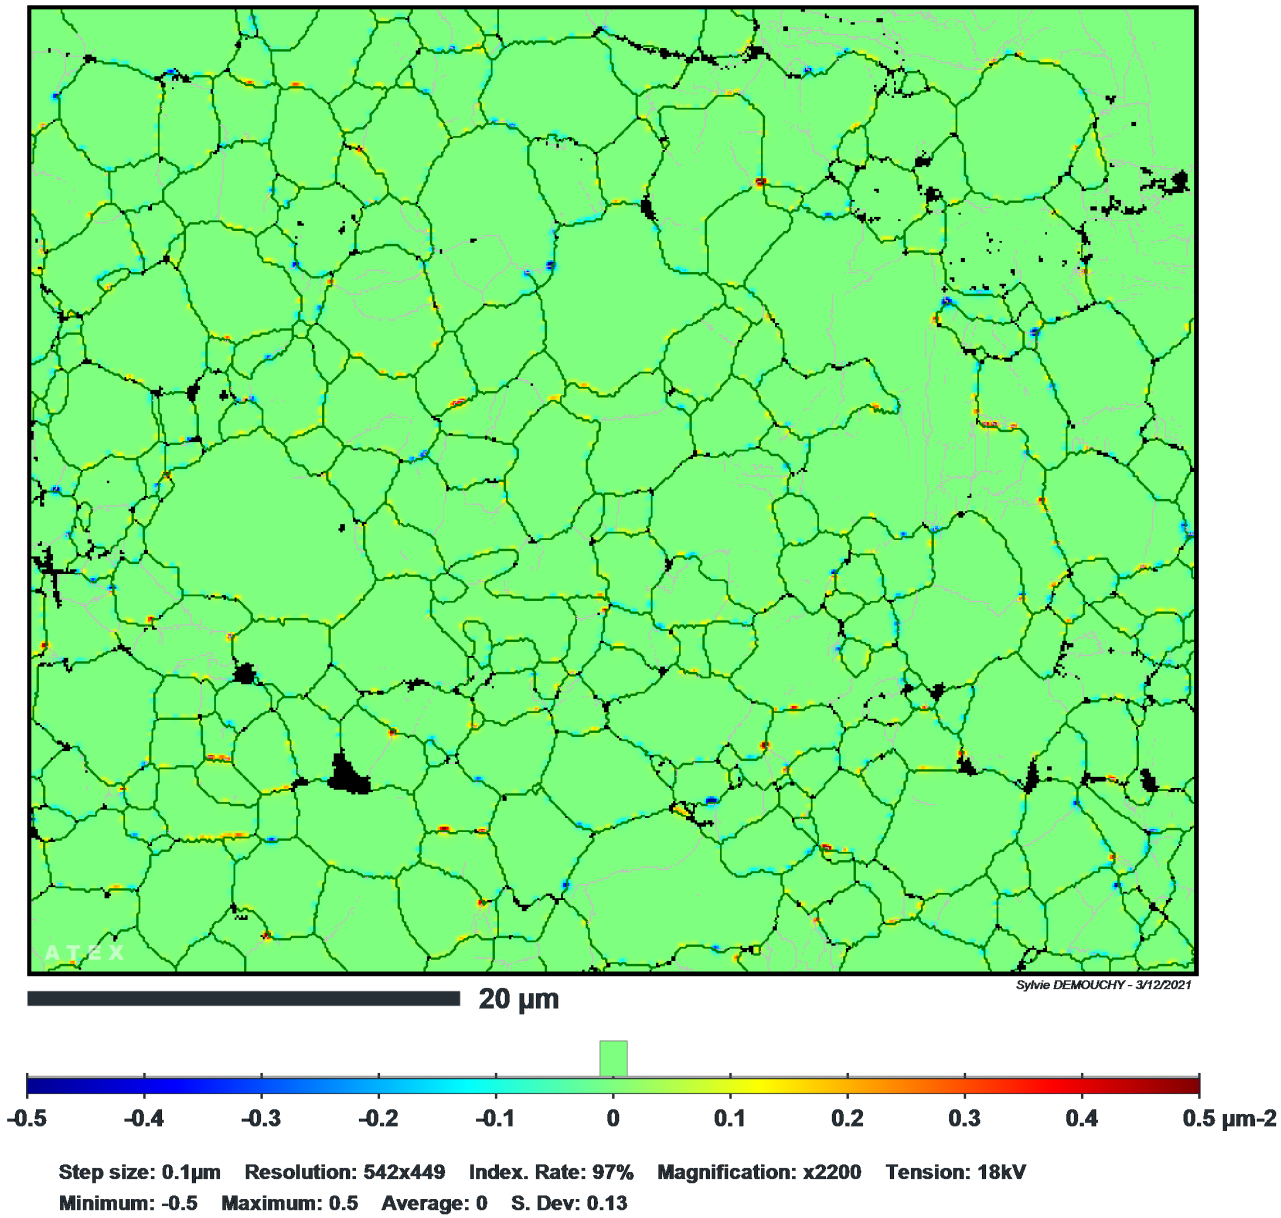

23 component Of Disclination Tensor

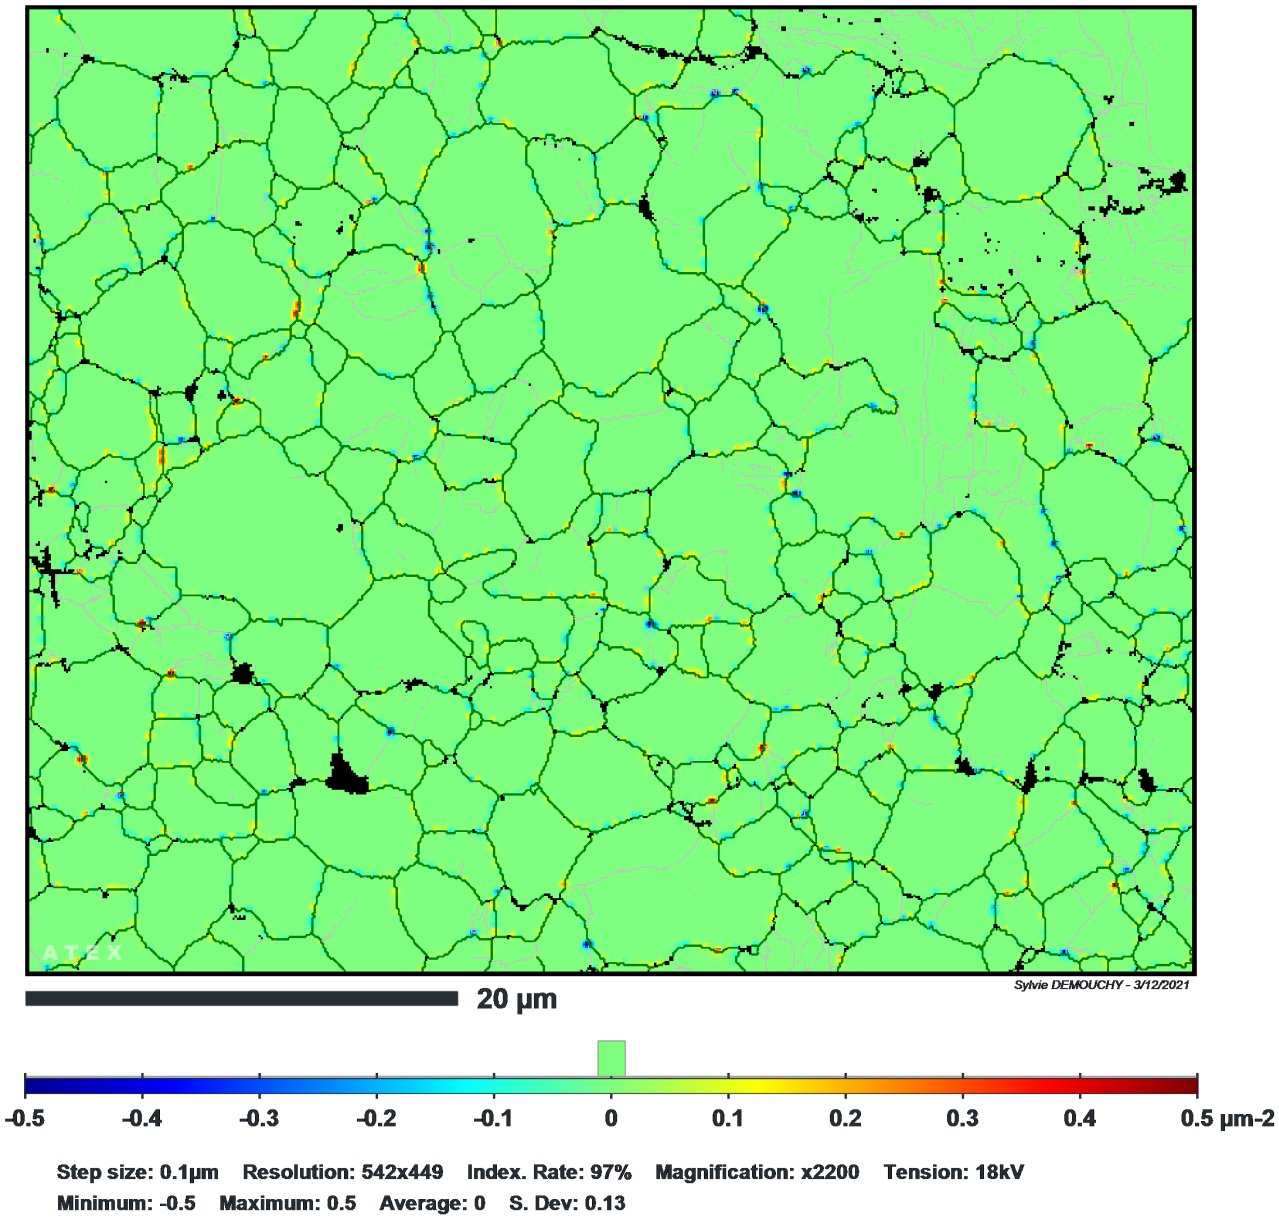

33 component Of Disclination Tensor

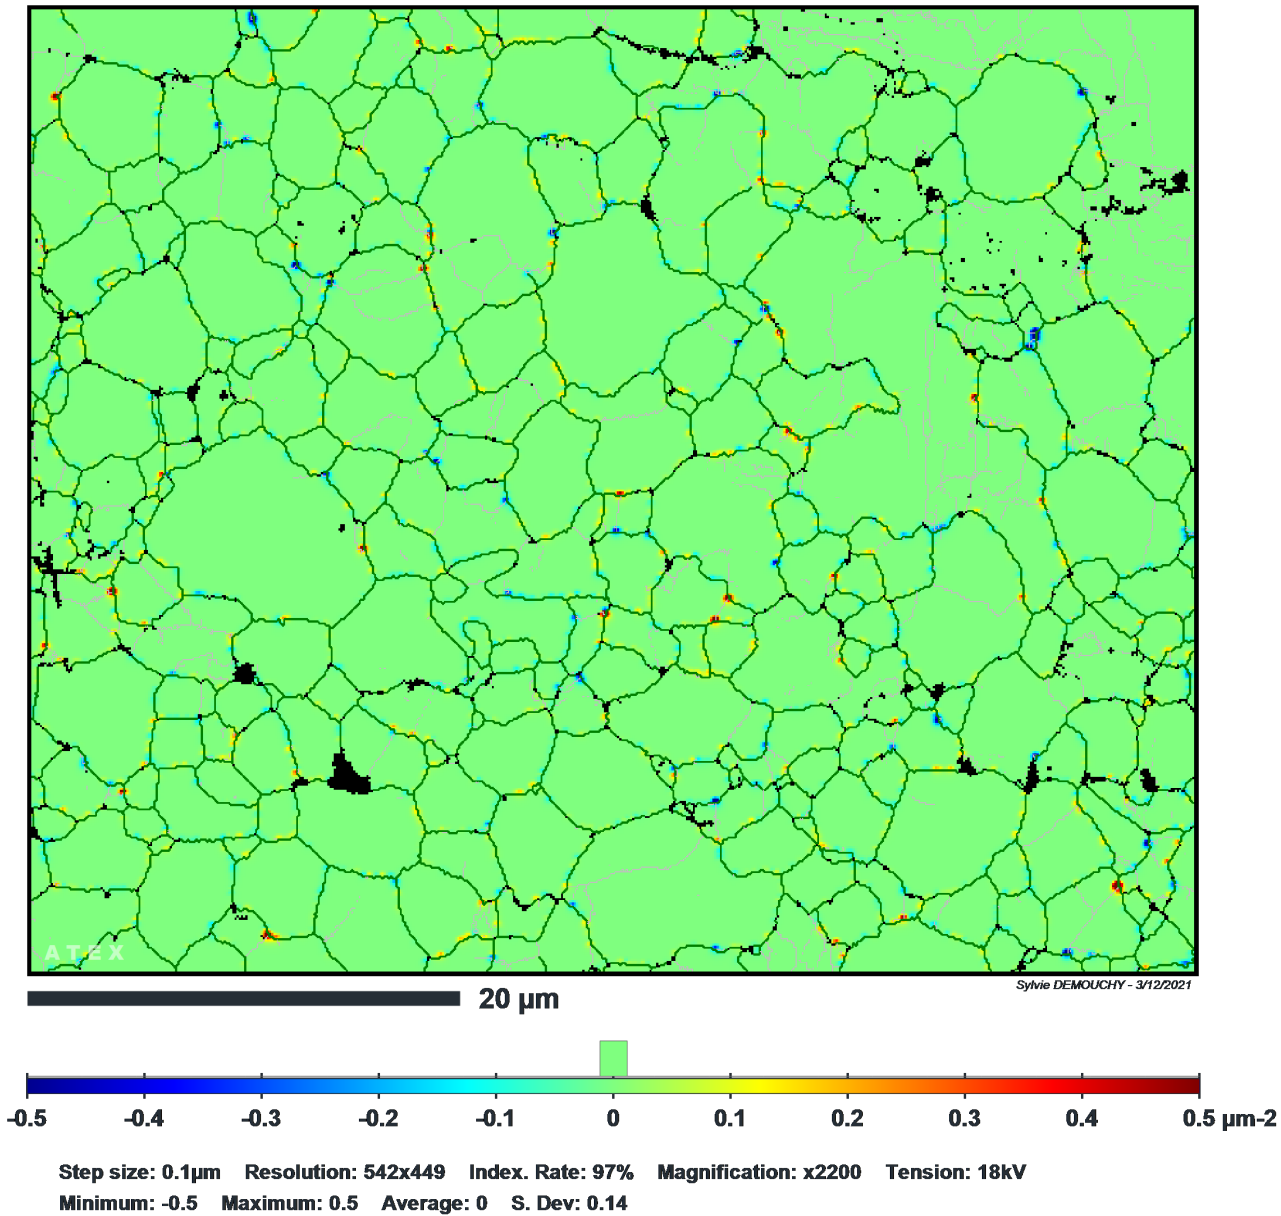

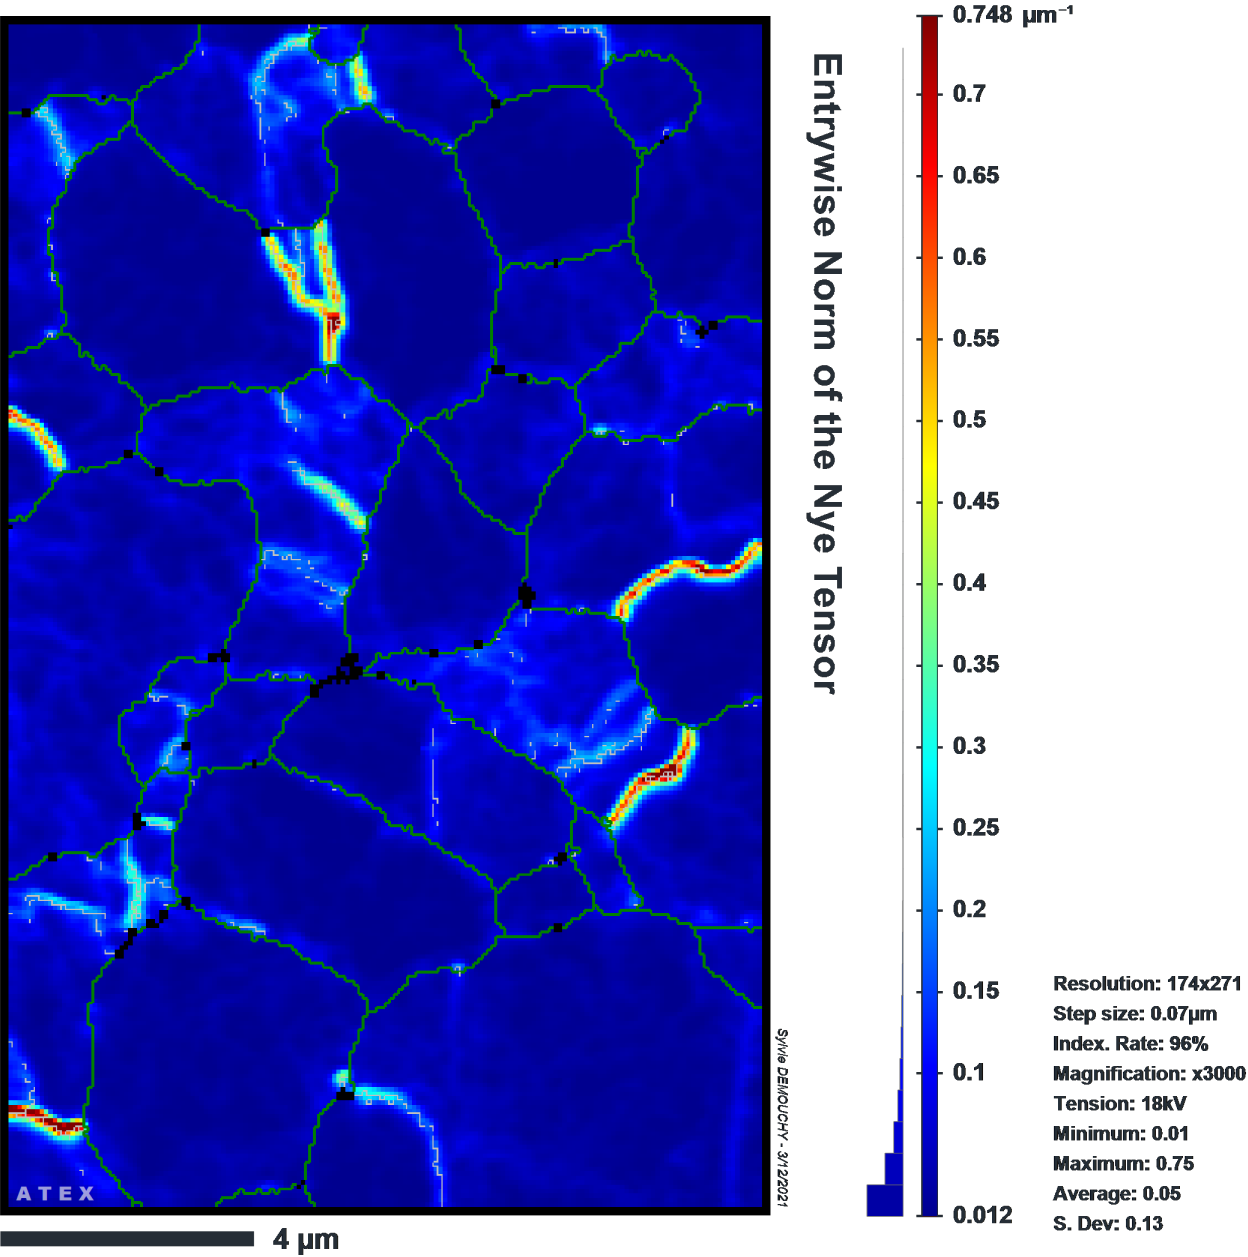

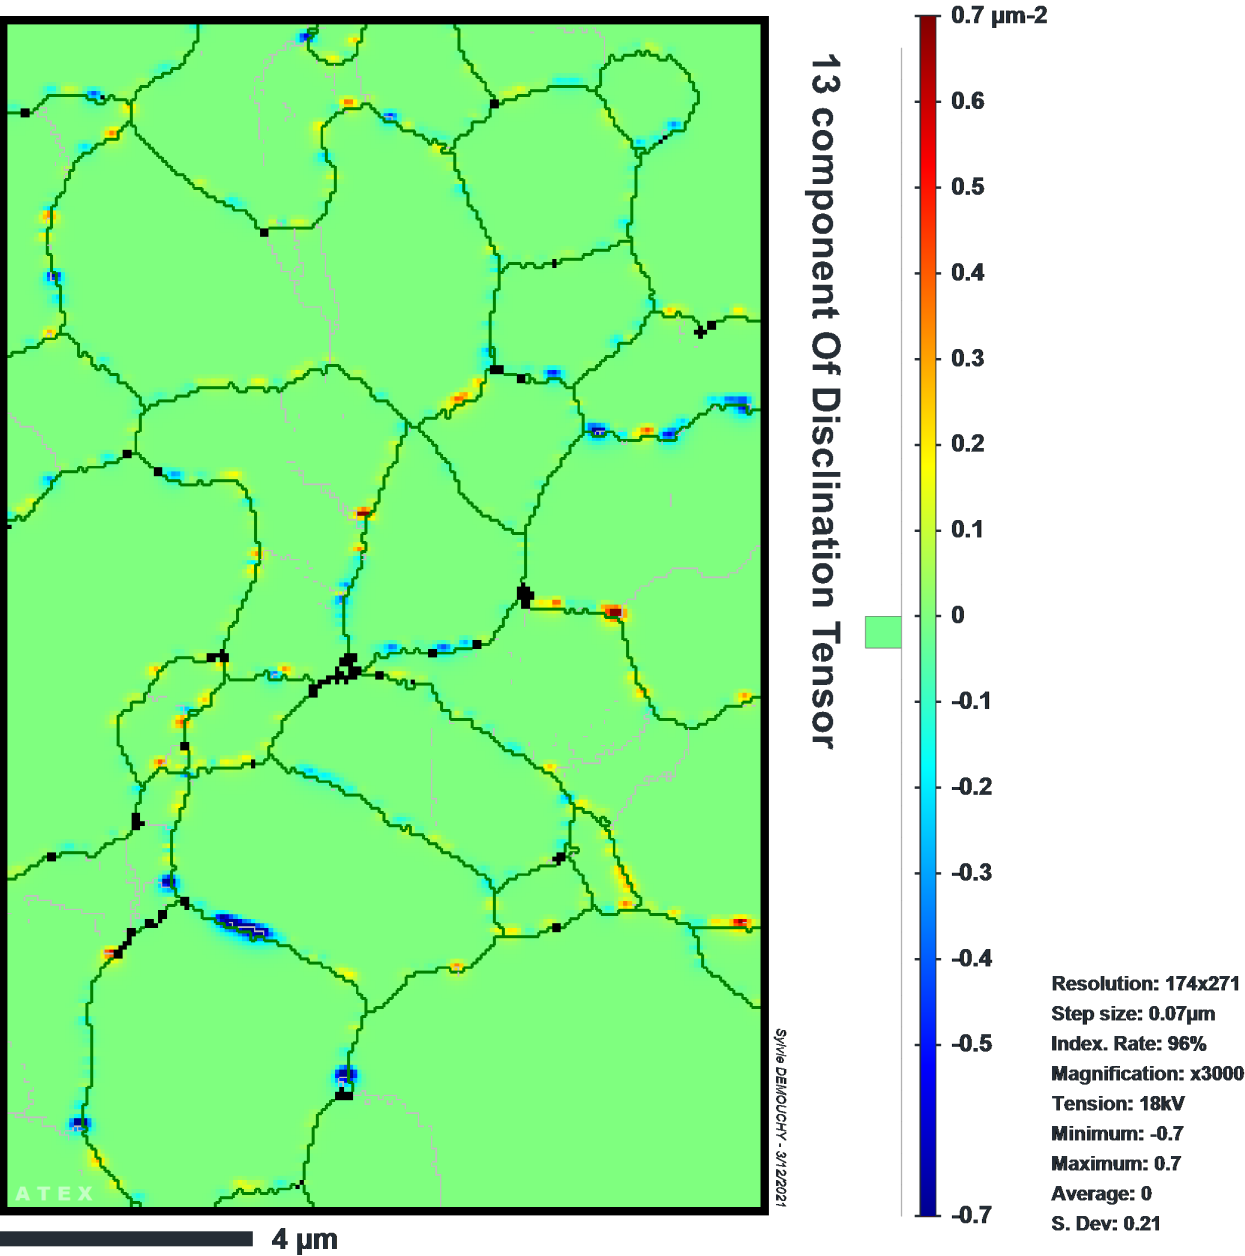

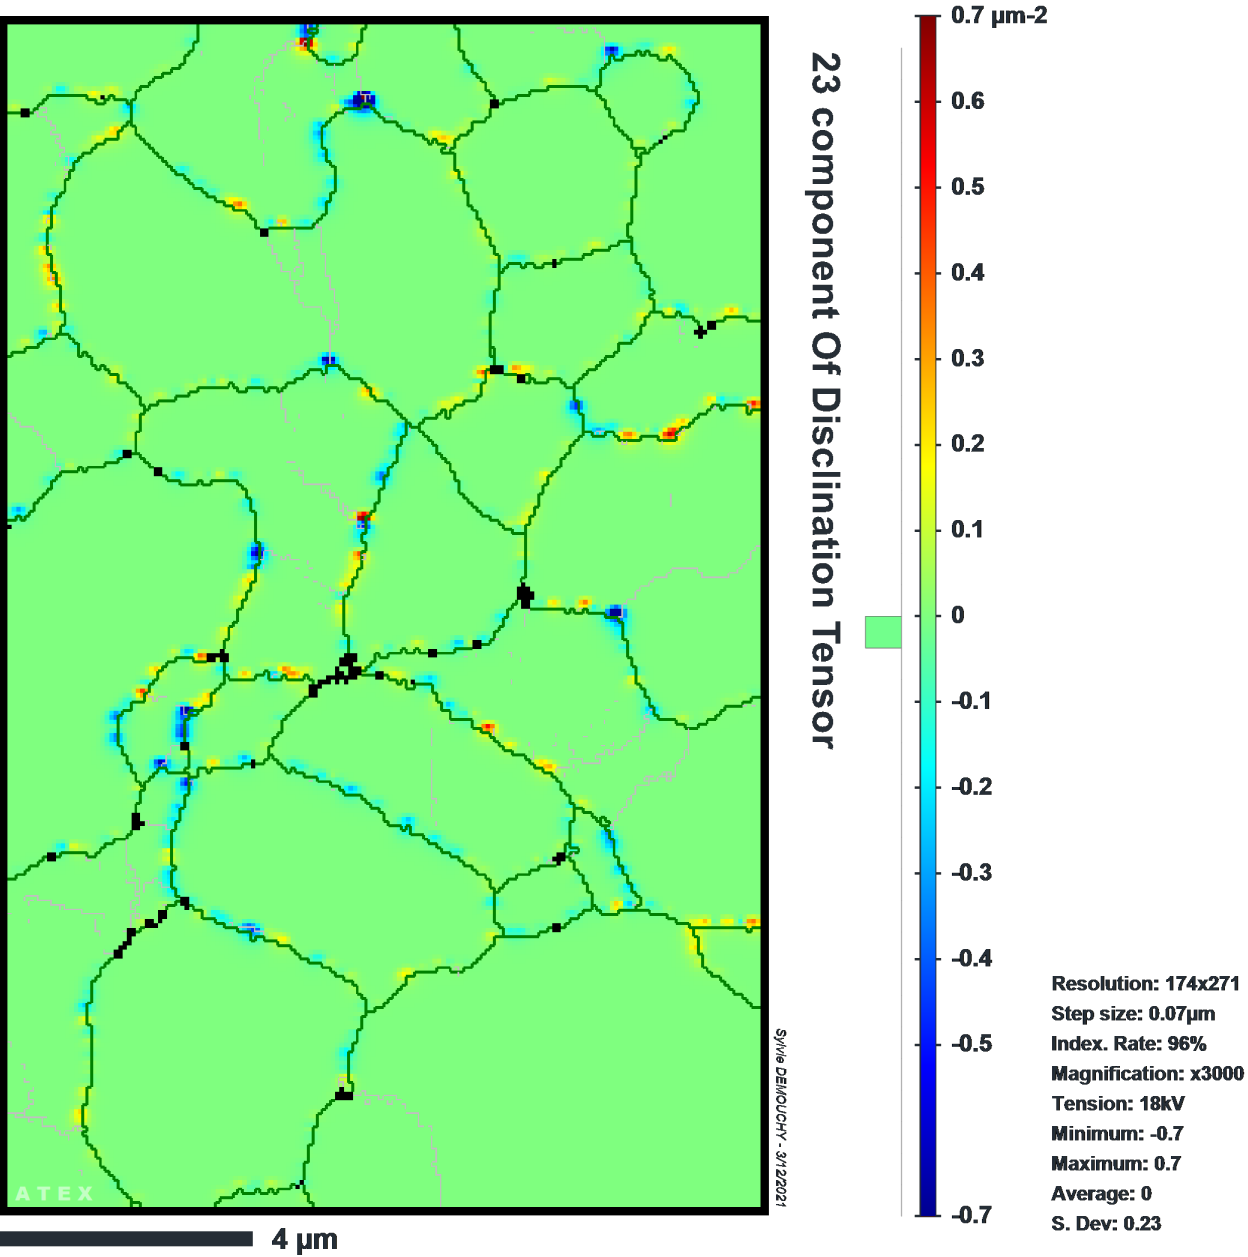

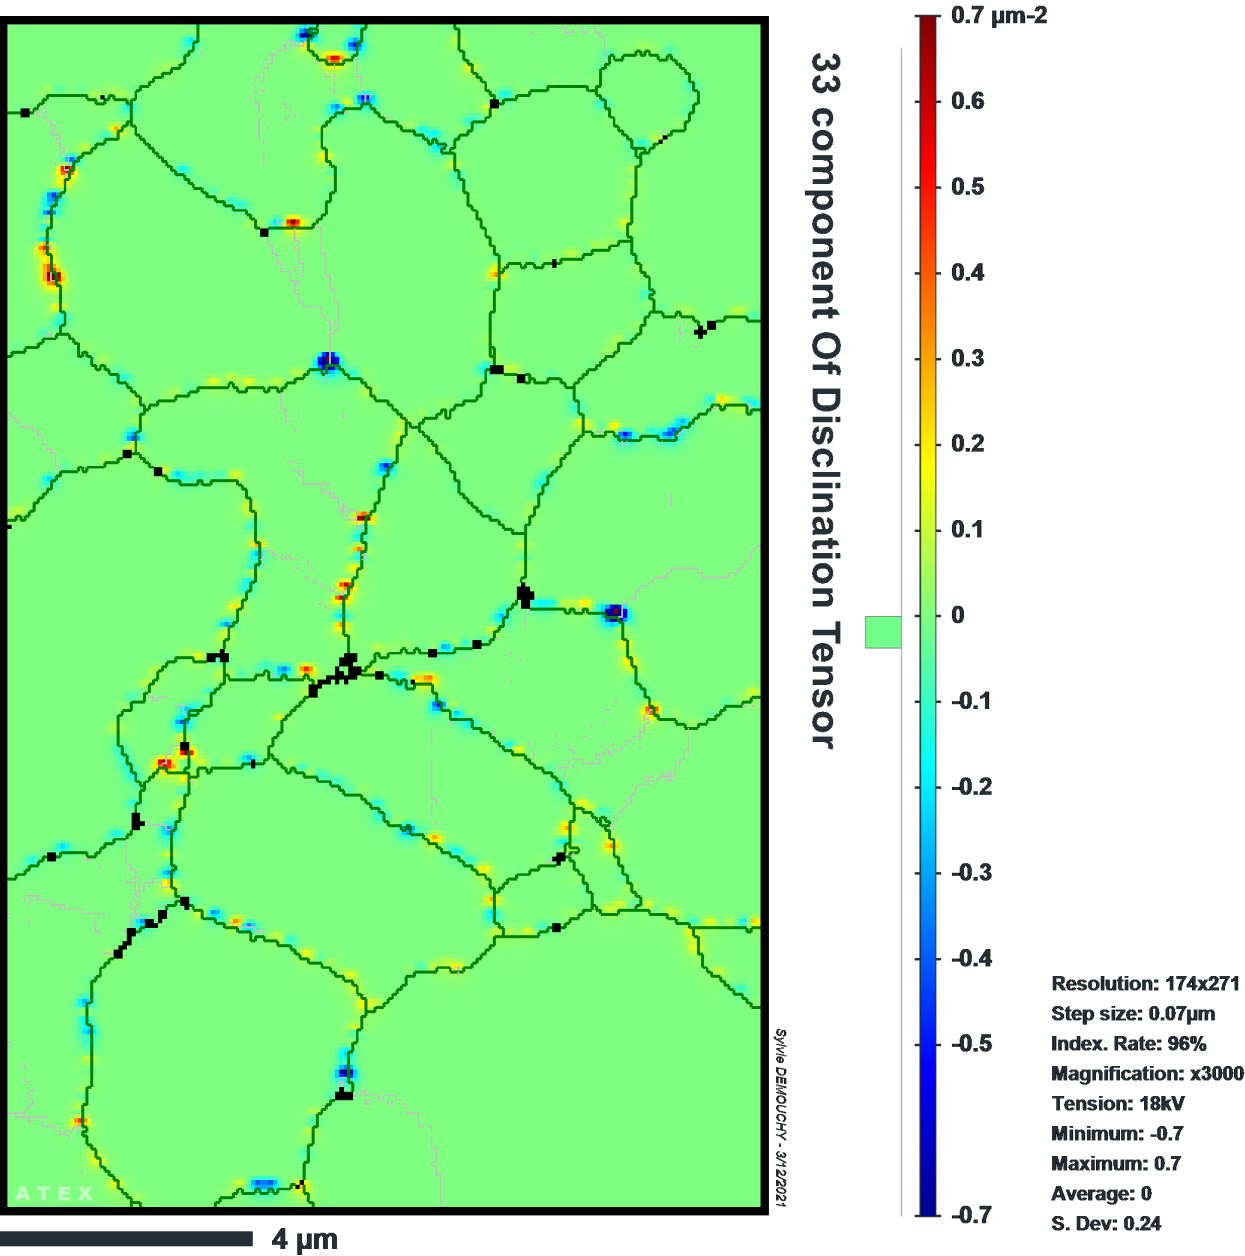

Entrywise Norm of the Nye Tensor

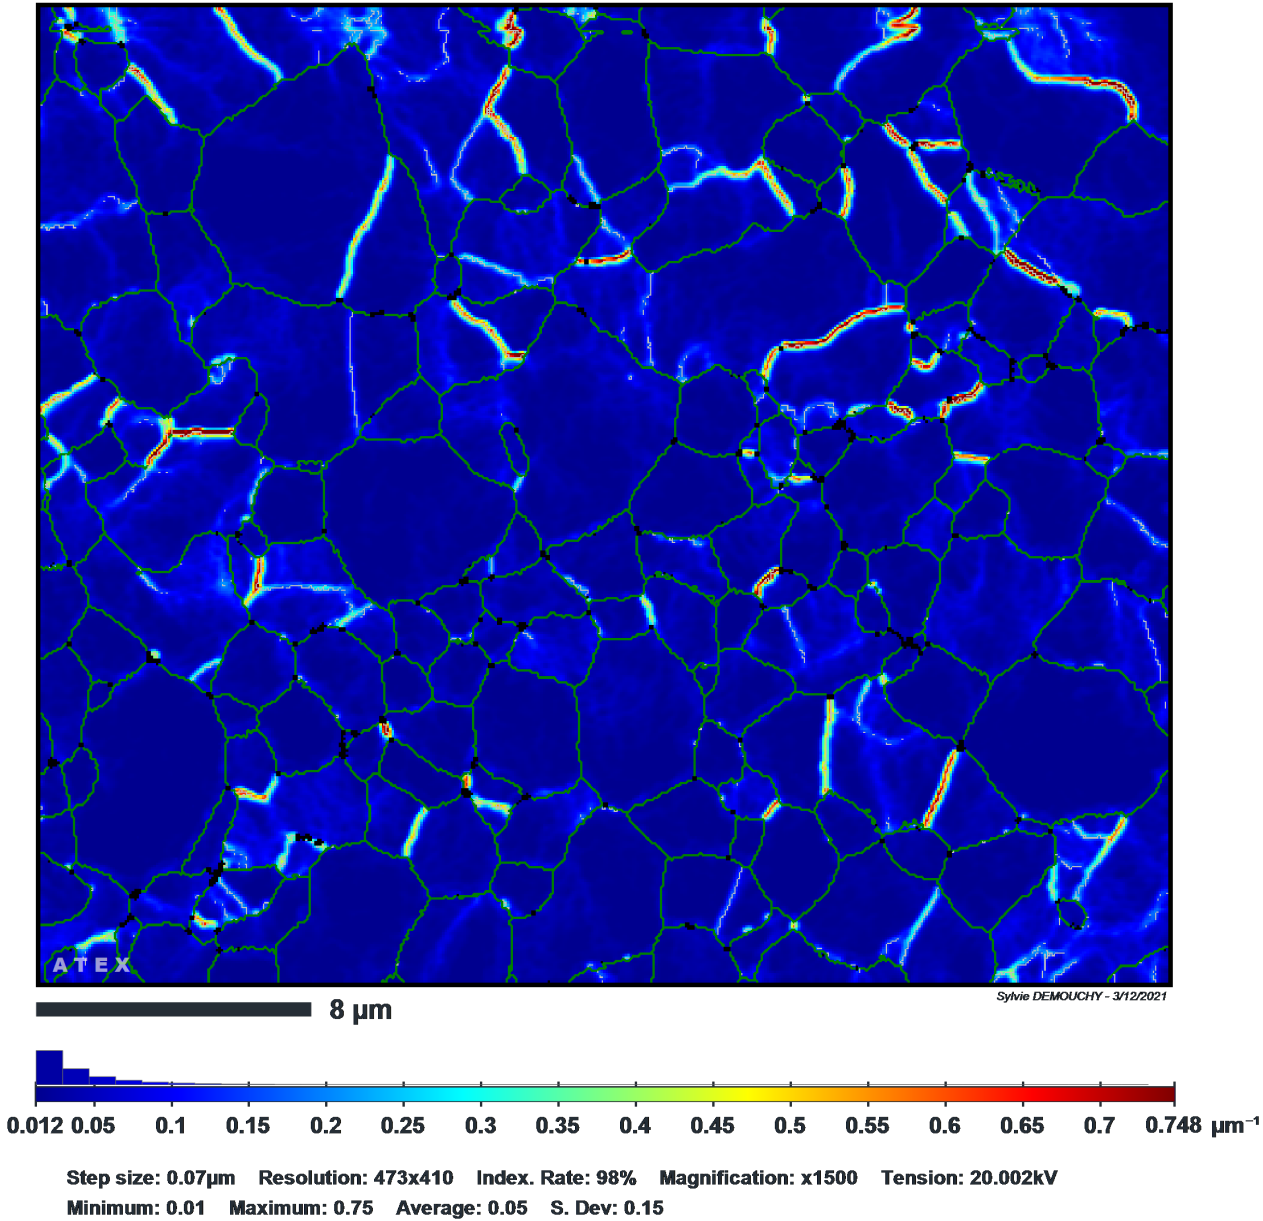

13 component Of Disclination Tensor

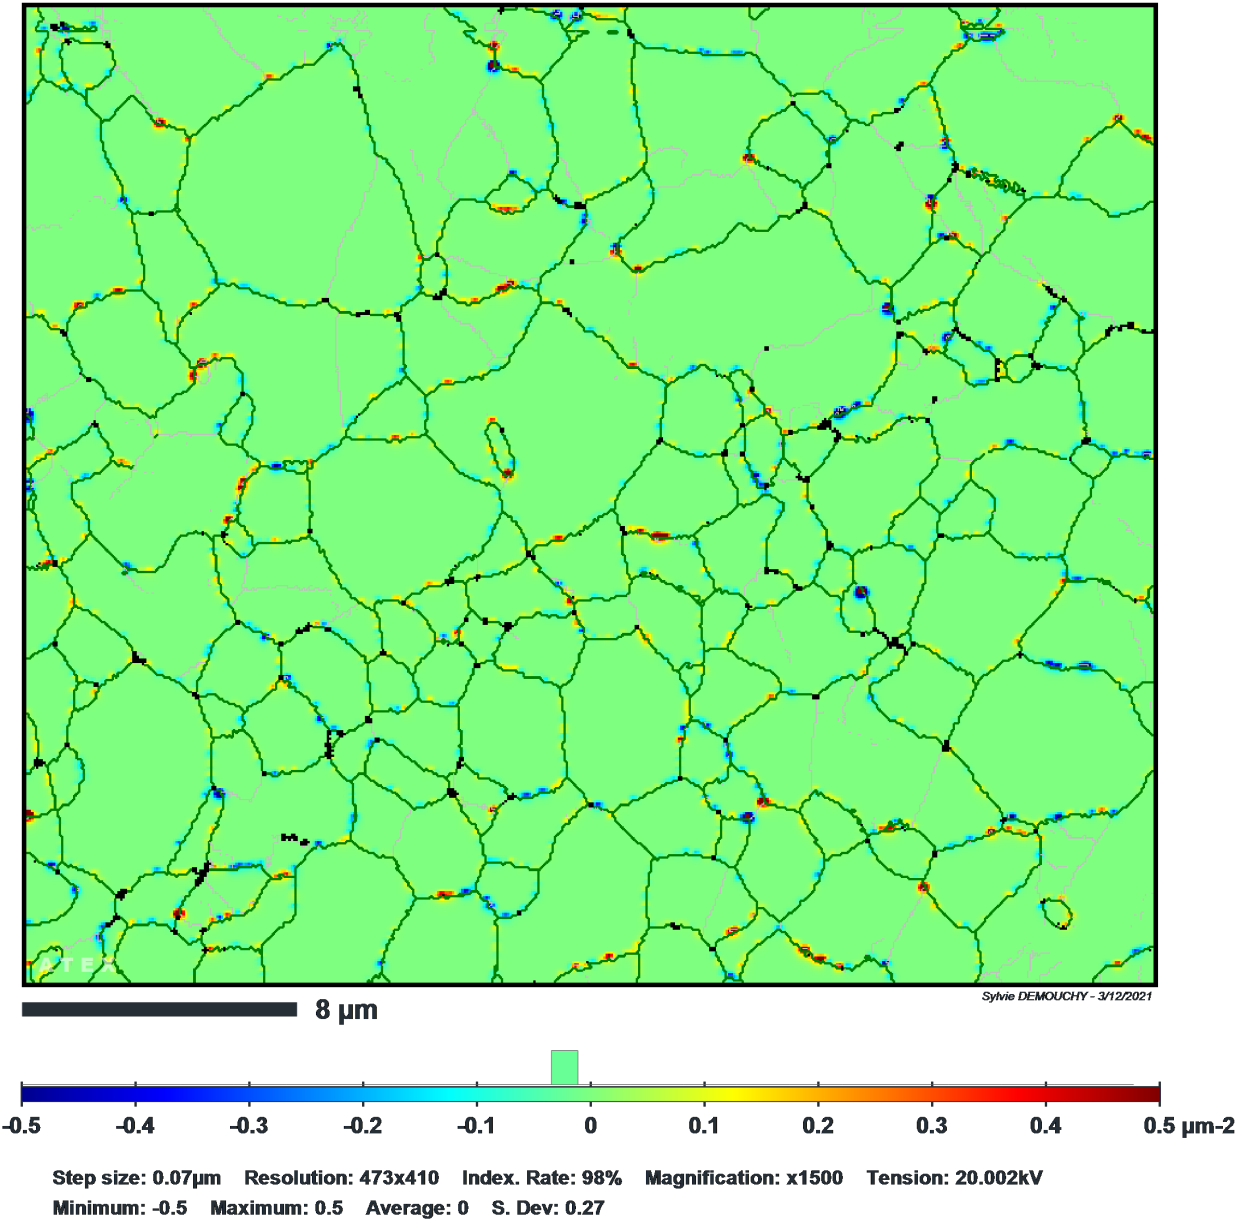

23 component Of Disclination Tensor

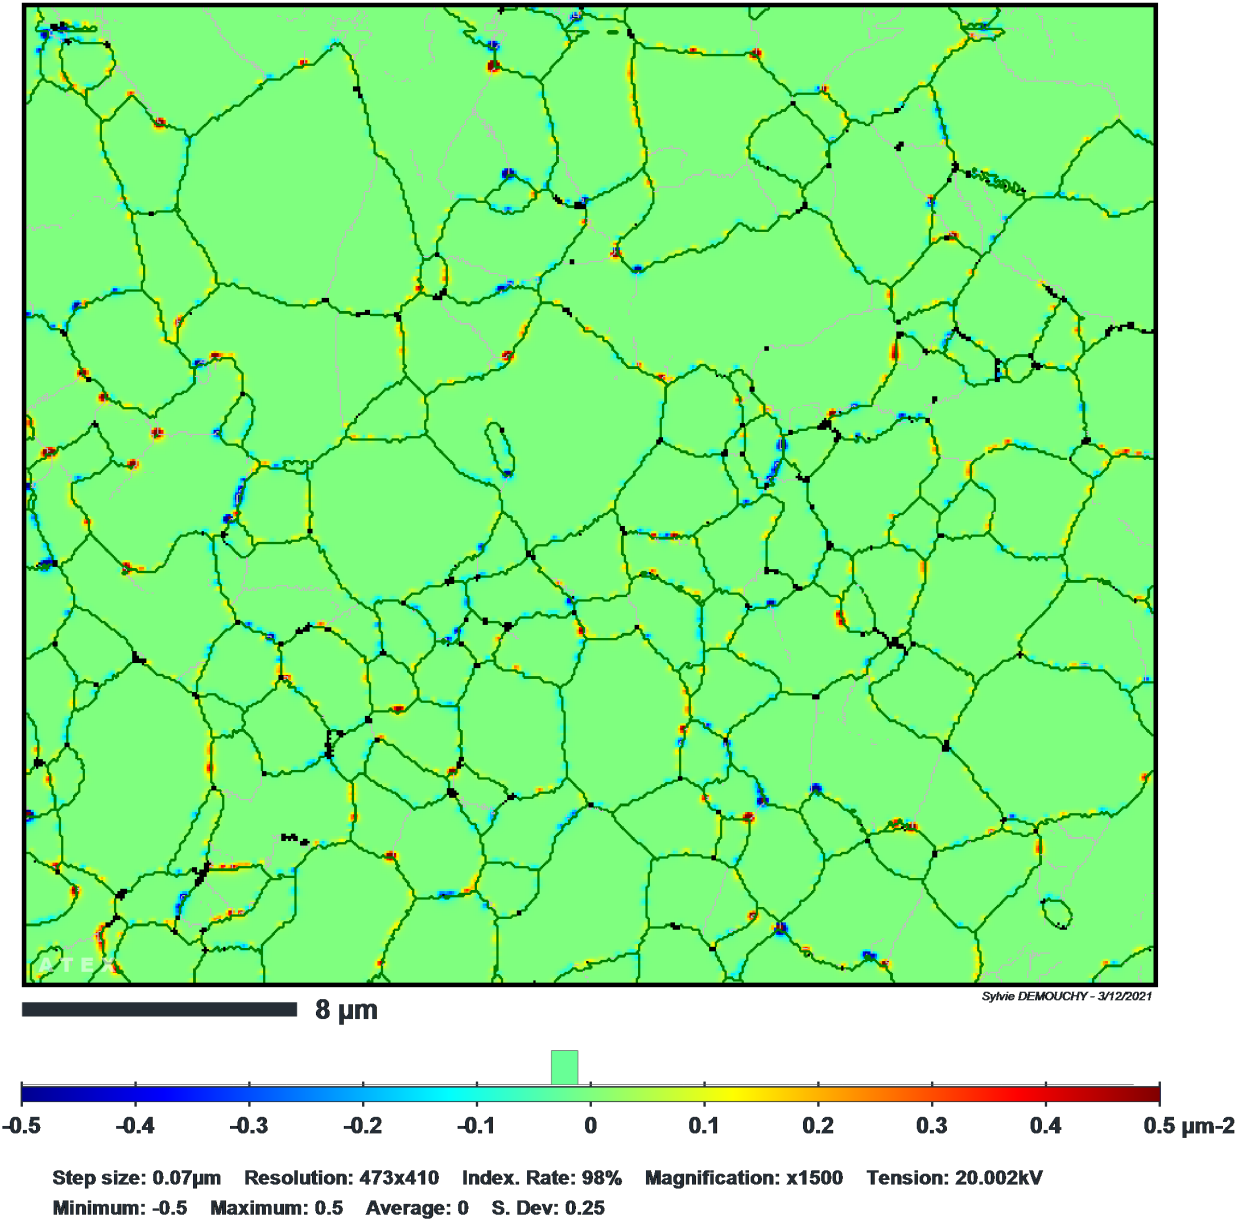

33 component Of Disclination Tensor

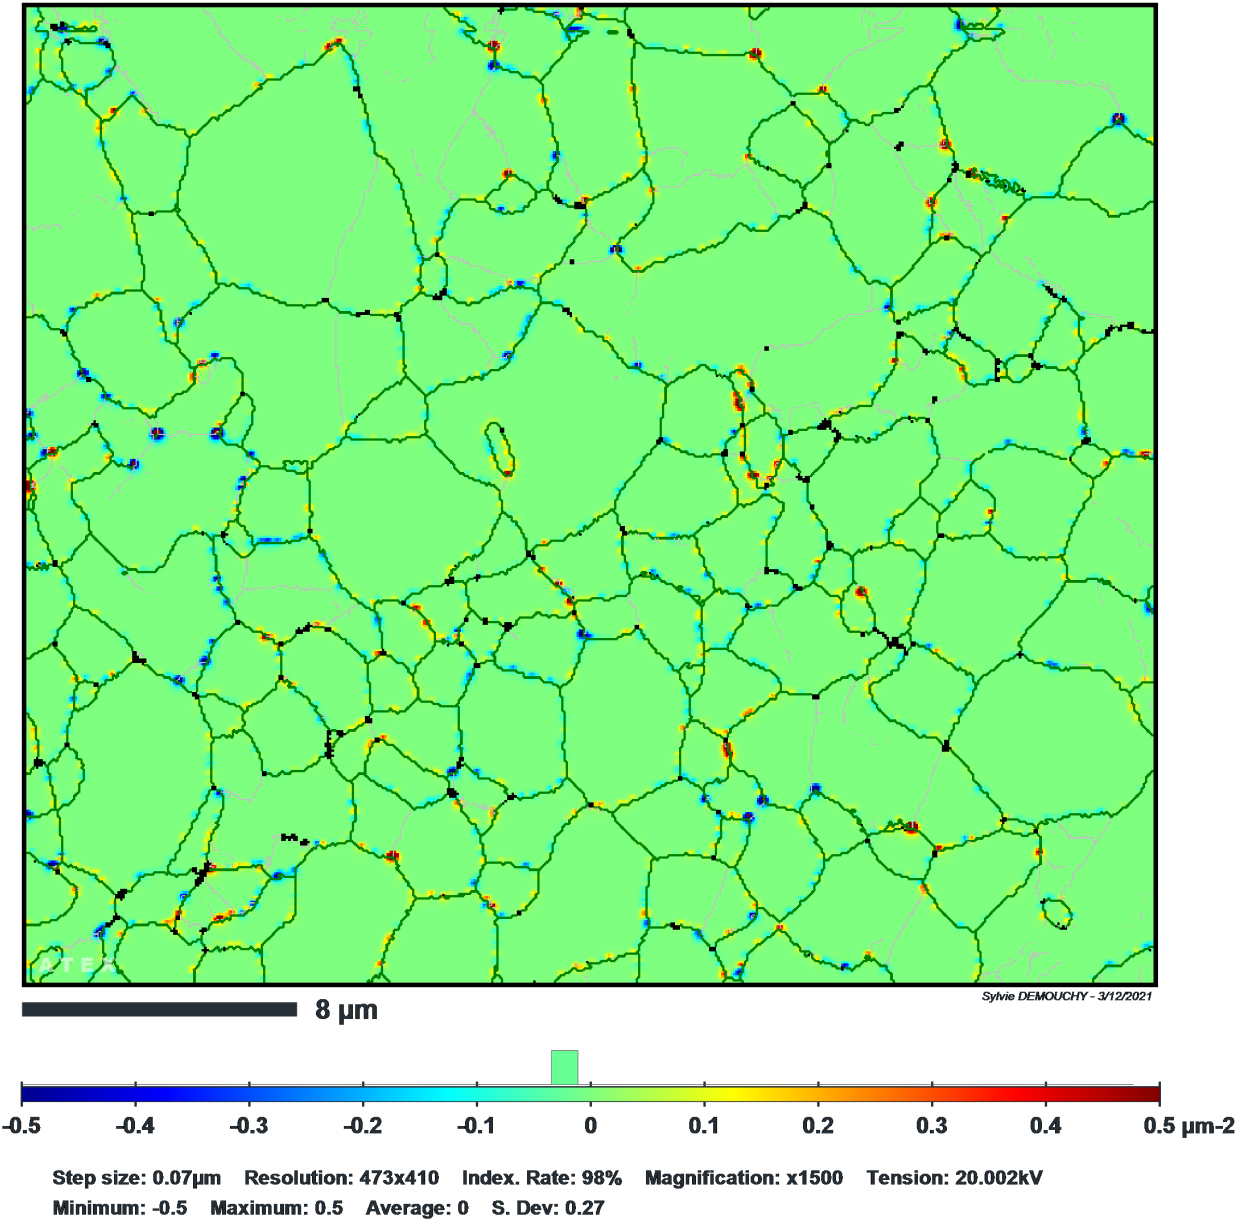

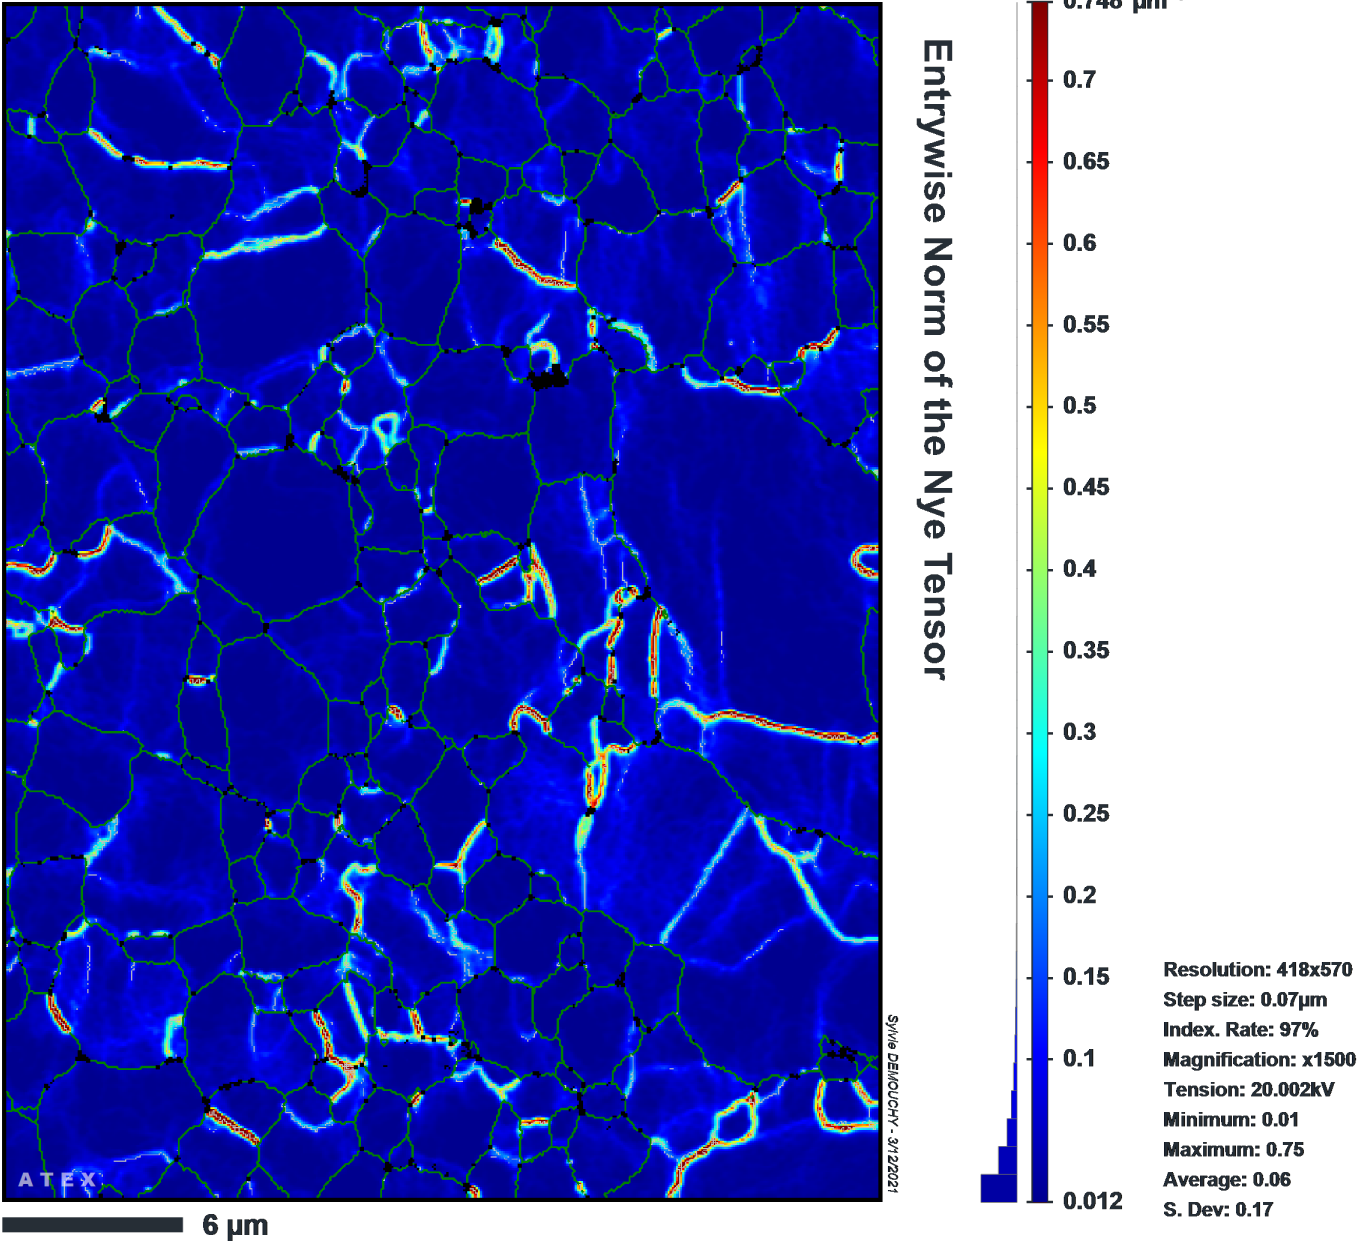

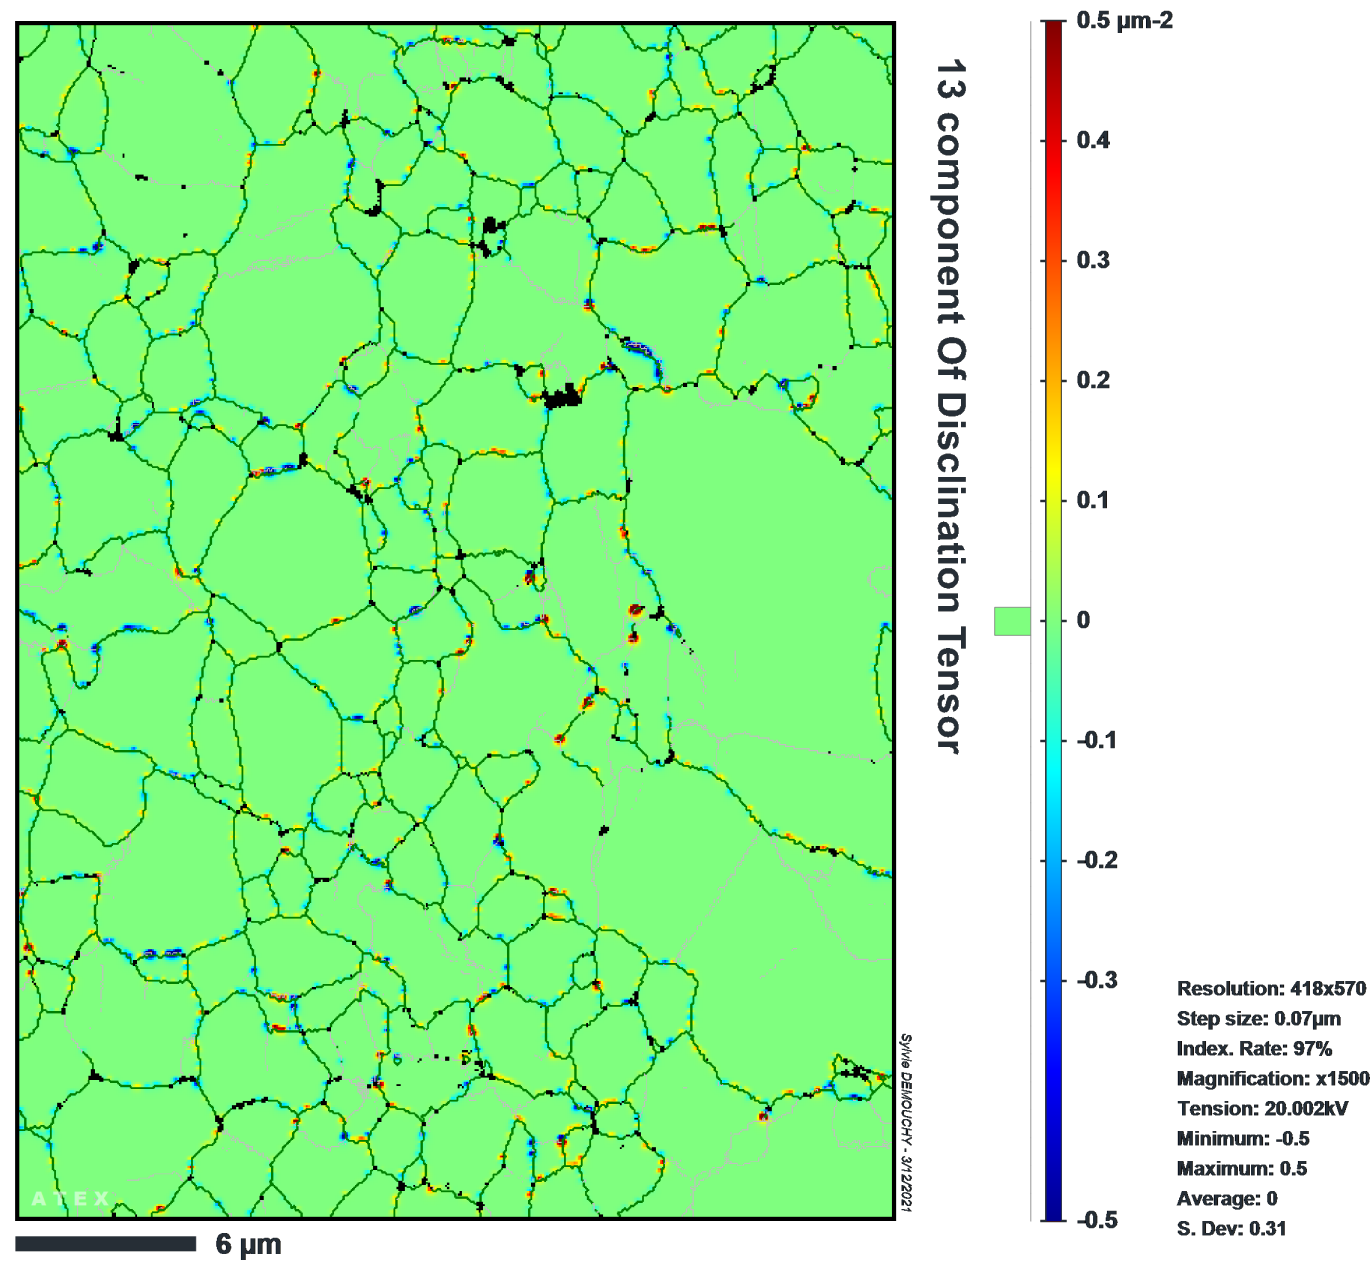

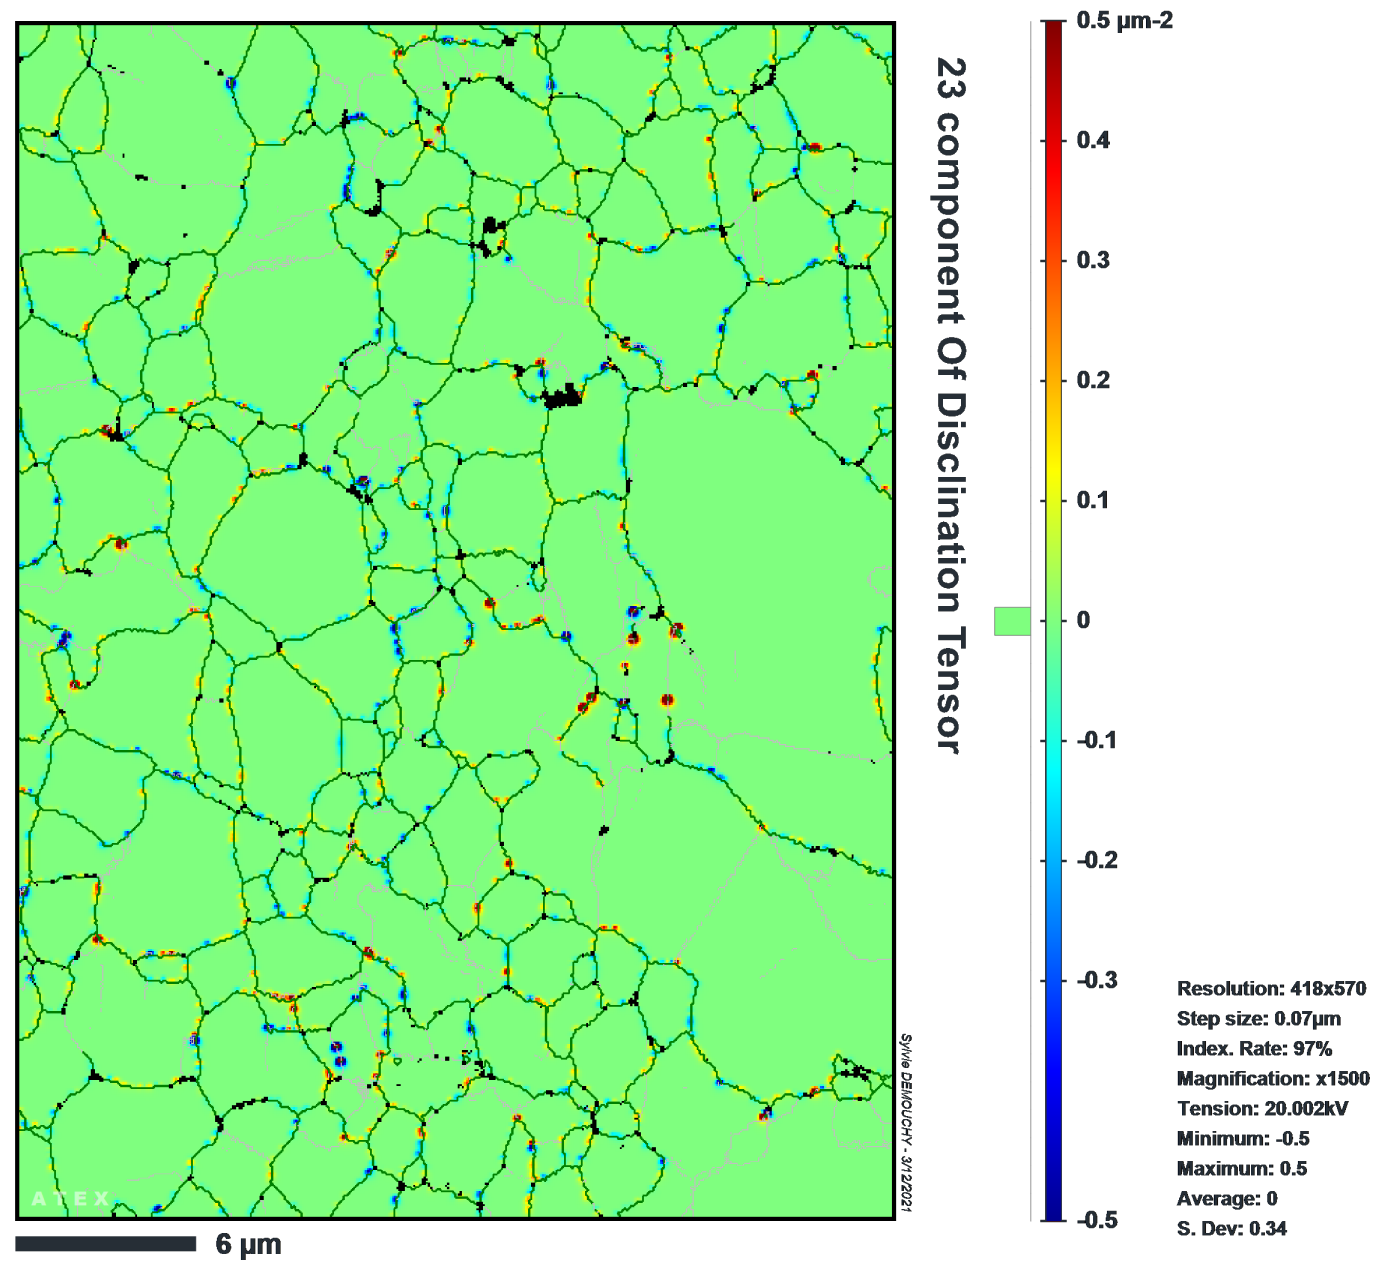

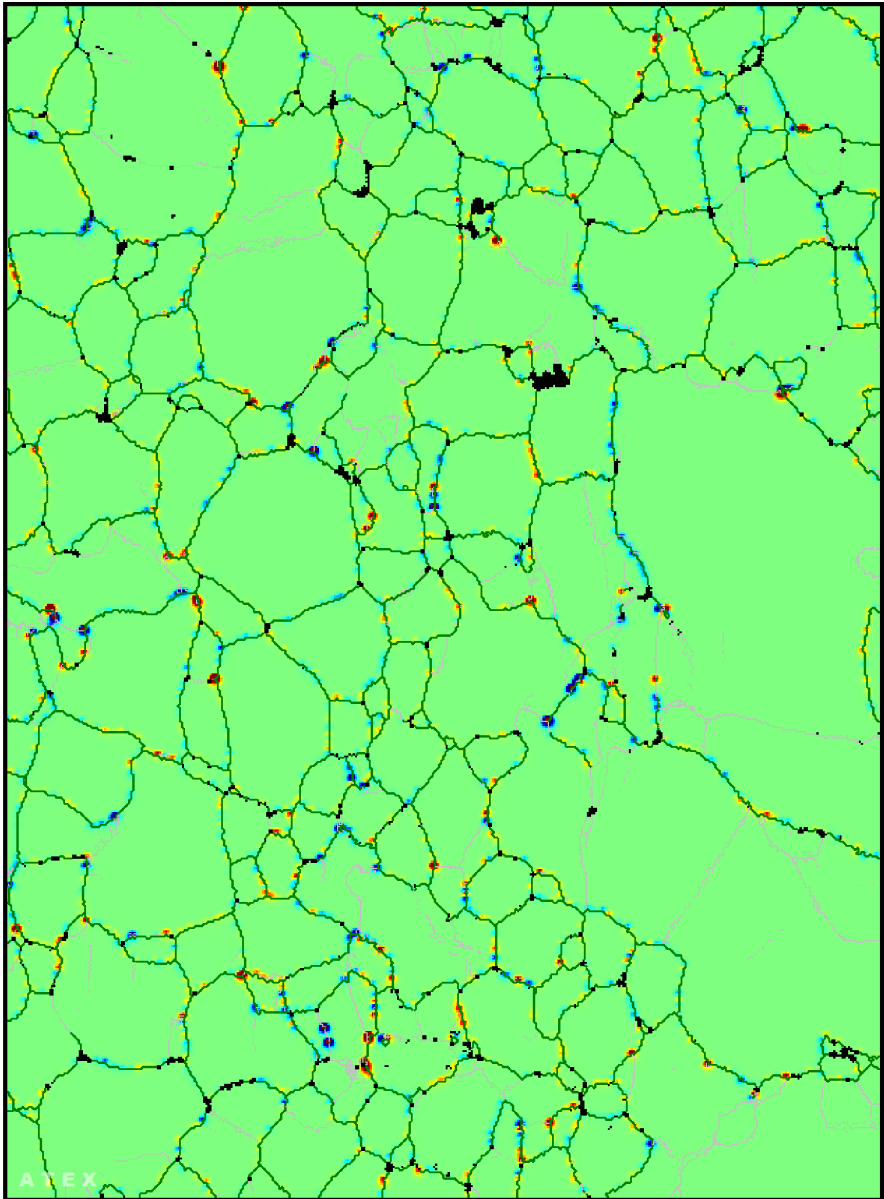

33 component Of Disclination Tensor

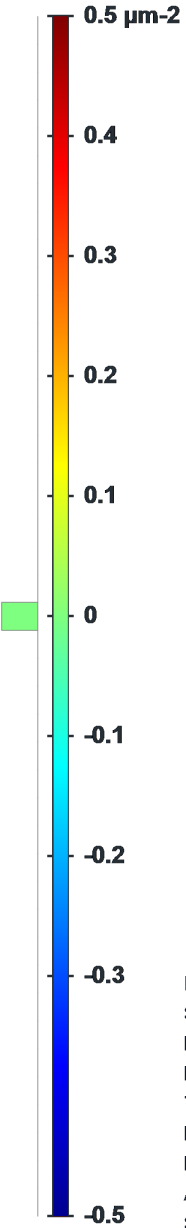

Resolution: 418x570  
Step size: 0.07μm  
Index. Rate: 97%  
Magnification: x1500  
Tension: 20.002kV  
Minimum: -0.5  
Maximum: 0.5  
Average: 0  
S. Dev: 0.35

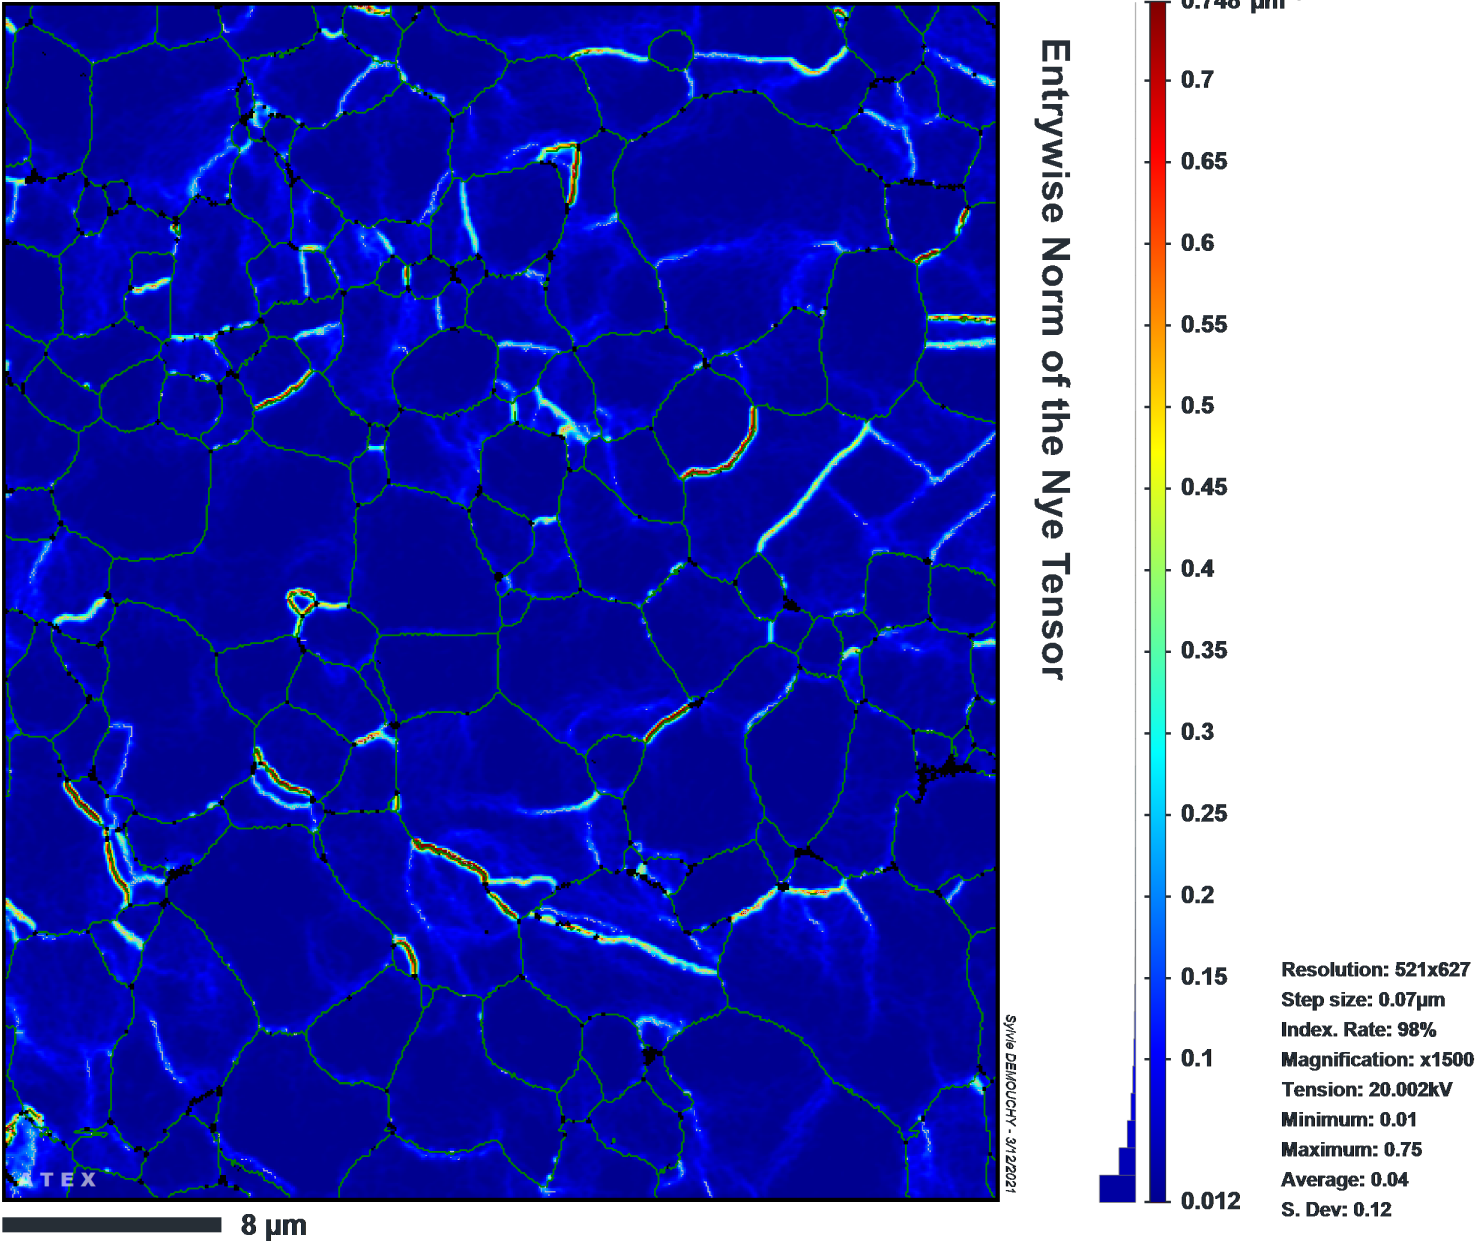

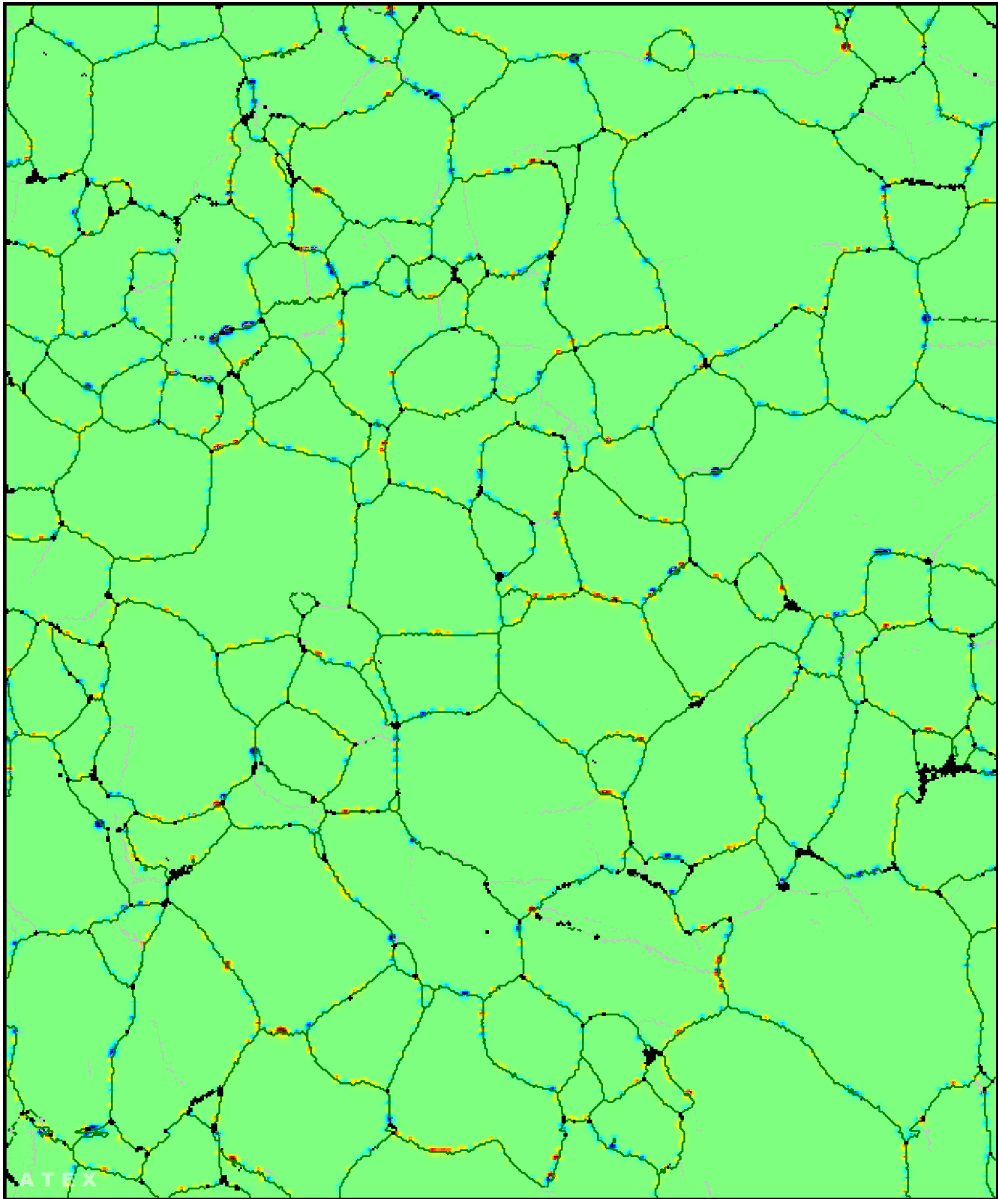

SYNTECH - 3/12/2021

13 component Of Disclination Tensor

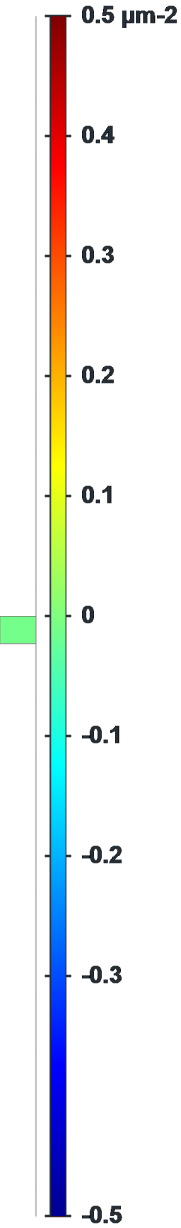

Resolution: 521x627  
Step size: 0.07μm  
Index. Rate: 98%  
Magnification: x1500  
Tension: 20.002kV  
Minimum: -0.5  
Maximum: 0.5  
Average: 0  
S. Dev: 0.2

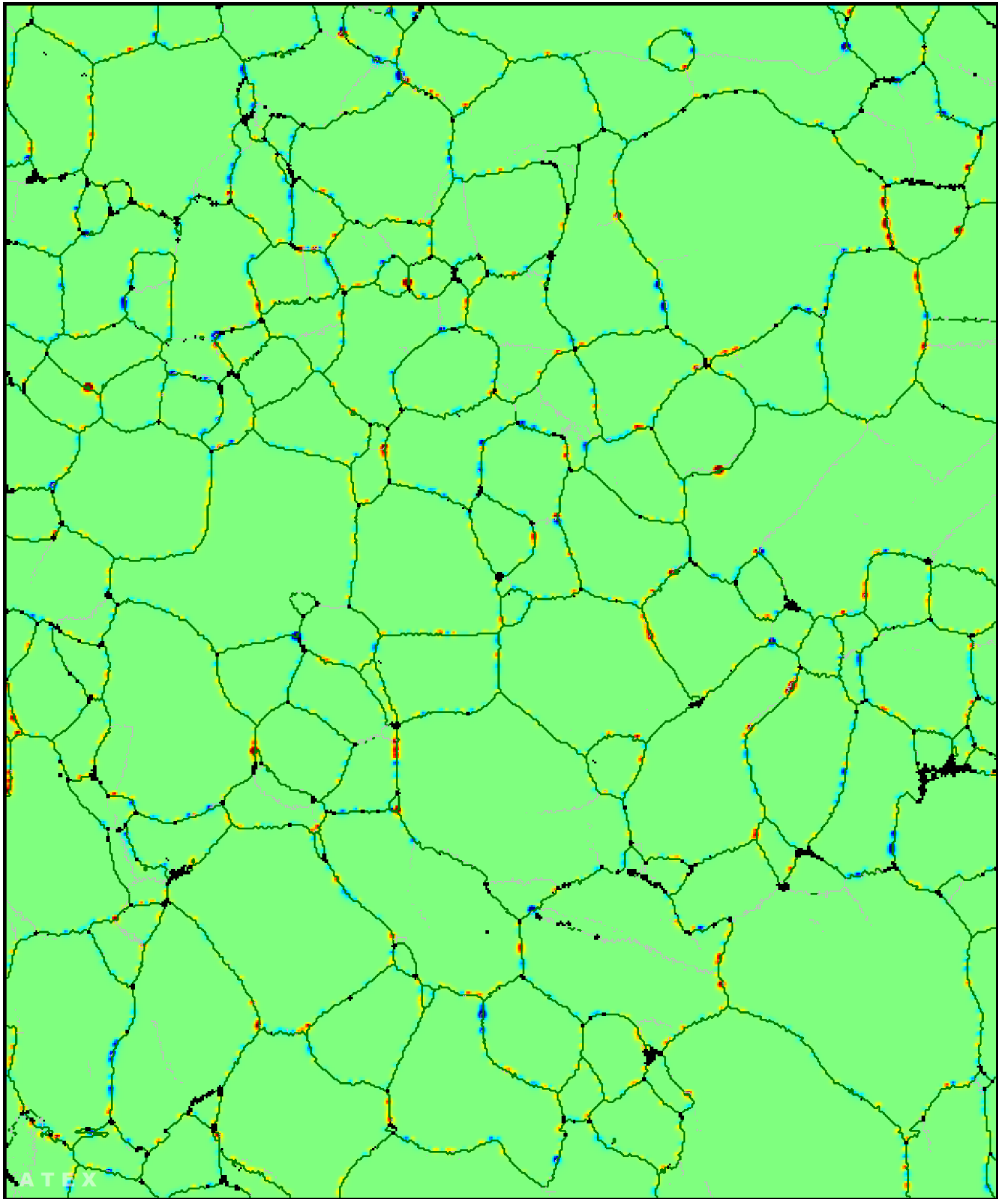

Sylvie DELOUCHY - 3/12/2021

23 component Of Disclination Tensor

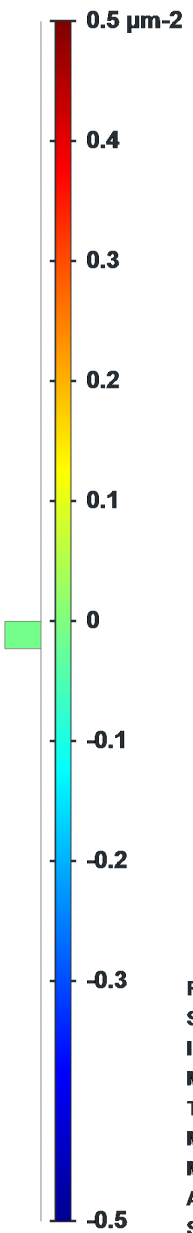

Resolution: 521x627  
Step size: 0.07μm  
Index. Rate: 98%  
Magnification: x1500  
Tension: 20.002kV  
Minimum: -0.5  
Maximum: 0.5  
Average: 0  
S. Dev: 0.19

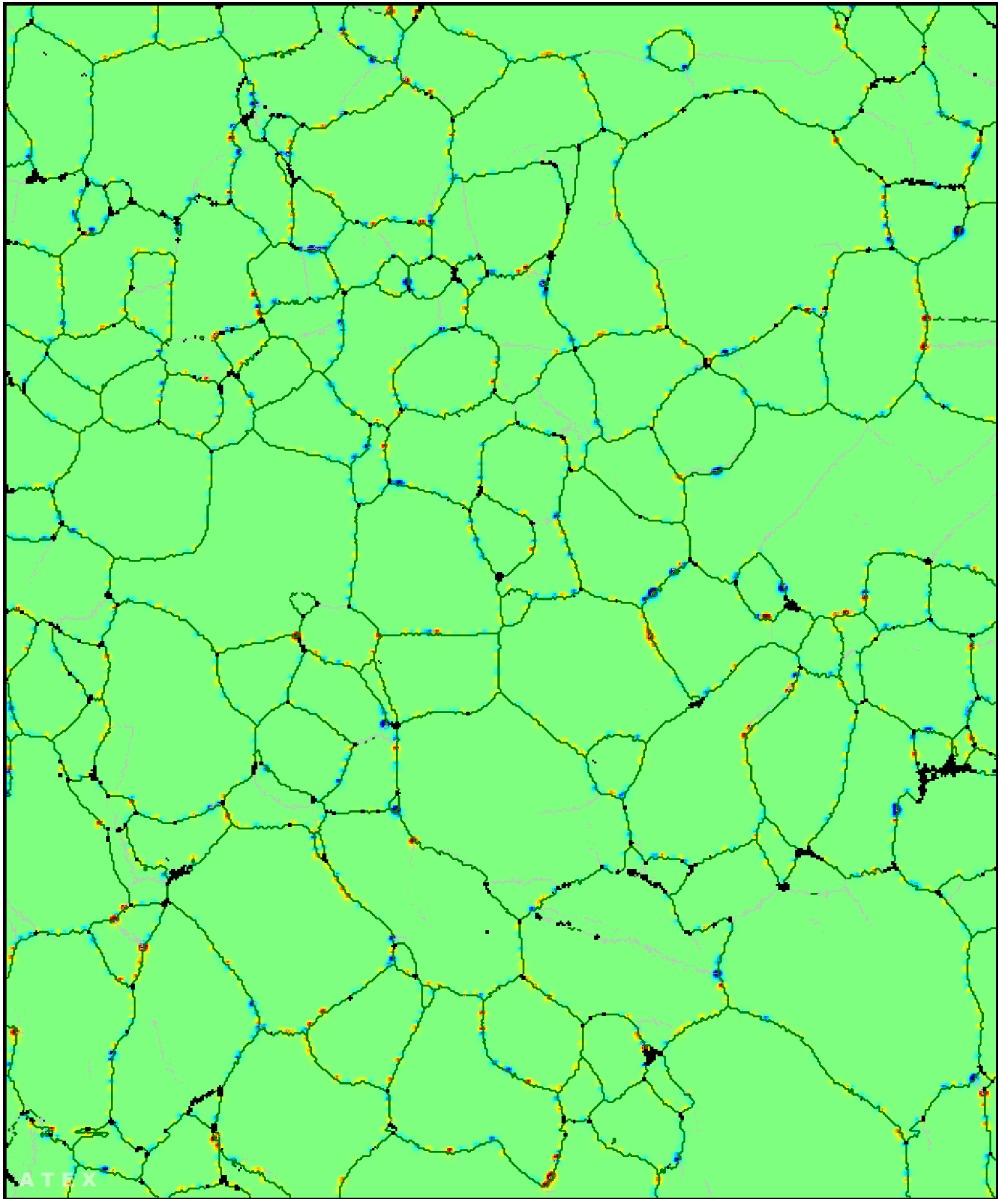

33 component Of Disclination Tensor

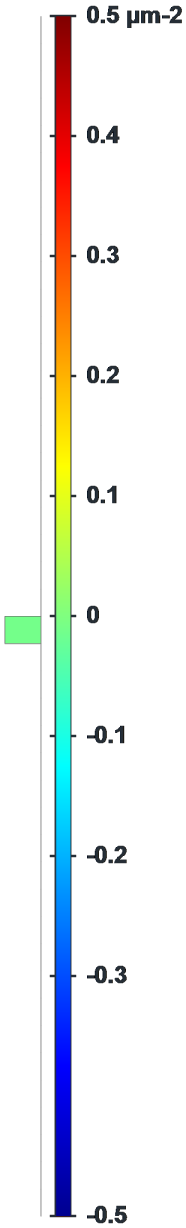

Resolution: 521x627  
Step size: 0.07 $\mu\text{m}$   
Index. Rate: 98%  
Magnification: x1500  
Tension: 20.002kV  
Minimum: -0.5  
Maximum: 0.5  
Average: 0  
S. Dev: 0.2

8  $\mu\text{m}$
